# Supplementary material for: Predictable NHEJ Insertion and Assessment of HDR Editing Strategies in Plants
Source: Front Genome Ed. 2022 Mar 16;4:825236. doi: 10.3389/fgeed.2022.825236 (PMC9037586; doi:10.3389/fgeed.2022.825236)
Supplement: Supplementary file 5 [file Table4.XLSX]

## Sheet: Plate1-A1_Canonical gRNA
TargetSequence	Reads	AvgQScore	Type	Pct	IndelLength	TargetAA	ReferenceAA	WideTargetSeq	WideReference	TargetLeftFlank	TargetRightFlank
CCTTTCTCTGTGCTGACTGCGGGGGGATGGGGATCTGGGTGGGGGTTCGCTACGATTCTCTGCTTGATGTGGAGACGGGCGGTTGAGATCGGAACTTGTTGGTGATAGATCTGCCTGTATGCTTCGTGTTGCATTGAATGGTGCTTAGATCTGTGGGATTGGTGATGGGATAGTCGGATTTGTCCATGTATTTGATACTTTCCCGGGTTGATTGCCATGGATTTGCGGGATATGGCATTA	13527	33	WT	20.85	0	PFSVLTAGGWGSGWGFATILCLMWRRAVEIGTCW*	PFSVLTAGGWGSGWGFATILCLMWRRAVEIGTCW*	CCTTTCTCTGTGCTGACTGCGGGGGGATGGGGATCTGGGTGGGGGTTCGCTACGATTCTCTGCTTGATGTGGAGACGGGCGGTTGAGATCGGAACTTGTTGGTGATAGATCTGCCTGTATGCTTCGTGTTGCATTGAATGGTGCTTAGATCTGTGGGATTGGTGATGGGATAGTCGGATTTGTCCATGTATTTGATACTTTCCCGGGTTGATTGCCATGGATTTGCGGGATATGGCATTA	CCTTTCTCTGTGCTGACTGCGGGGGGATGGGGATCTGGGTGGGGGTTCGCTACGATTCTCTGCTTGATGTGGAGACGGGCGGTTGAGATCGGAACTTGTTGGTGATAGATCTGCCTGTATGCTTCGTGTTGCATTGAATGGTGCTTAGATCTGTGGGATTGGTGATGGGATAGTCGGATTTGTCCATGTATTTGATACTTTCCCGGGTTGATTGCCATGGATTTGCGGGATATGGCATTA
CCTTTCTCTGTGCTGACTGCGGGGGGATGGGGATCTGGGTGGGGGTTCGCTACGATTCTCTGCTTGATGTGGAGACTgGGCGGTTGAGATCGGAACTTGTTGGTGATAGATCTGCCTGTATGCTTCGTGTTGCATTGAATGGTGCTTAGATCTGTGGGATTGGTGATGGGATAGTCGGATTTGTCCATGTATTTGATACTTTCCCGGGTTGATTGCCATGGATTTGCGGGATATGGCATTA	8799	33	Insertion	13.56	1	PFSVLTAGGWGSGWGFATILCLMWRLGG*	PFSVLTAGGWGSGWGFATILCLMWRRAVEIGTCW*	CCTTTCTCTGTGCTGACTGCGGGGGGATGGGGATCTGGGTGGGGGTTCGCTACGATTCTCTGCTTGATGTGGAGACTGGGCGGTTGAGATCGGAACTTGTTGGTGATAGATCTGCCTGTATGCTTCGTGTTGCATTGAATGGTGCTTAGATCTGTGGGATTGGTGATGGGATAGTCGGATTTGTCCATGTATTTGATACTTTCCCGGGTTGATTGCCATGGATTTGCGGGATATGGCATTA	CCTTTCTCTGTGCTGACTGCGGGGGGATGGGGATCTGGGTGGGGGTTCGCTACGATTCTCTGCTTGATGTGGAGACGGGCGGTTGAGATCGGAACTTGTTGGTGATAGATCTGCCTGTATGCTTCGTGTTGCATTGAATGGTGCTTAGATCTGTGGGATTGGTGATGGGATAGTCGGATTTGTCCATGTATTTGATACTTTCCCGGGTTGATTGCCATGGATTTGCGGGATATGGCATTA
CCTTTCTCTGTGCTGACTGCGGGGGGATGGGGATCTGGGTGGGGGTTCGCTACGATTCTCTGCTTGATGTGGAGACcGGGCGGTTGAGATCGGAACTTGTTGGTGATAGATCTGCCTGTATGCTTCGTGTTGCATTGAATGGTGCTTAGATCTGTGGGATTGGTGATGGGATAGTCGGATTTGTCCATGTATTTGATACTTTCCCGGGTTGATTGCCATGGATTTGCGGGATATGGCATTA	8278	33	Insertion	12.76	1	PFSVLTAGGWGSGWGFATILCLMWRPGG*	PFSVLTAGGWGSGWGFATILCLMWRRAVEIGTCW*	CCTTTCTCTGTGCTGACTGCGGGGGGATGGGGATCTGGGTGGGGGTTCGCTACGATTCTCTGCTTGATGTGGAGACCGGGCGGTTGAGATCGGAACTTGTTGGTGATAGATCTGCCTGTATGCTTCGTGTTGCATTGAATGGTGCTTAGATCTGTGGGATTGGTGATGGGATAGTCGGATTTGTCCATGTATTTGATACTTTCCCGGGTTGATTGCCATGGATTTGCGGGATATGGCATTA	CCTTTCTCTGTGCTGACTGCGGGGGGATGGGGATCTGGGTGGGGGTTCGCTACGATTCTCTGCTTGATGTGGAGACGGGCGGTTGAGATCGGAACTTGTTGGTGATAGATCTGCCTGTATGCTTCGTGTTGCATTGAATGGTGCTTAGATCTGTGGGATTGGTGATGGGATAGTCGGATTTGTCCATGTATTTGATACTTTCCCGGGTTGATTGCCATGGATTTGCGGGATATGGCATTA
CCTTTCTCTGTGCTGACTGCGGGGGGATGGGGATCTGGGTGGGGGTTCGCTACGATTCTCTGCTTGATGTGG---CGGGCGGTTGAGATCGGAACTTGTTGGTGATAGATCTGCCTGTATGCTTCGTGTTGCATTGAATGGTGCTTAGATCTGTGGGATTGGTGATGGGATAGTCGGATTTGTCCATGTATTTGATACTTTCCCGGGTTGATTGCCATGGATTTGCGGGATATGGCATTA	6381	29	Deletion	9.83	-3	PFSVLTAGGWGSGWGFATILCLMWRAVEIGTCW*	PFSVLTAGGWGSGWGFATILCLMWRRAVEIGTCW*	CCTTTCTCTGTGCTGACTGCGGGGGGATGGGGATCTGGGTGGGGGTTCGCTACGATTCTCTGCTTGATGTGG---CGGGCGGTTGAGATCGGAACTTGTTGGTGATAGATCTGCCTGTATGCTTCGTGTTGCATTGAATGGTGCTTAGATCTGTGGGATTGGTGATGGGATAGTCGGATTTGTCCATGTATTTGATACTTTCCCGGGTTGATTGCCATGGATTTGCGGGATATGGCATTA	CCTTTCTCTGTGCTGACTGCGGGGGGATGGGGATCTGGGTGGGGGTTCGCTACGATTCTCTGCTTGATGTGGAGACGGGCGGTTGAGATCGGAACTTGTTGGTGATAGATCTGCCTGTATGCTTCGTGTTGCATTGAATGGTGCTTAGATCTGTGGGATTGGTGATGGGATAGTCGGATTTGTCCATGTATTTGATACTTTCCCGGGTTGATTGCCATGGATTTGCGGGATATGGCATTA
CCTTTCTCTGTGCTGACTGCGGGGGGATGGGGATCTGGGTGGGGGTTCGCTACGATTCTCTGCTTGATGTGG----GGGCGGTTGAGATCGGAACTTGTTGGTGATAGATCTGCCTGTATGCTTCGTGTTGCATTGAATGGTGCTTAGATCTGTGGGATTGGTGATGGGATAGTCGGATTTGTCCATGTATTTGATACTTTCCCGGGTTGATTGCCATGGATTTGCGGGATATGGCATTA	4387	32	Deletion	6.76	-4	PFSVLTAGGWGSGWGFATILCLMWGRLRSELVGDRSACMLRVALNGA*	PFSVLTAGGWGSGWGFATILCLMWRRAVEIGTCW*	CCTTTCTCTGTGCTGACTGCGGGGGGATGGGGATCTGGGTGGGGGTTCGCTACGATTCTCTGCTTGATGTGG----GGGCGGTTGAGATCGGAACTTGTTGGTGATAGATCTGCCTGTATGCTTCGTGTTGCATTGAATGGTGCTTAGATCTGTGGGATTGGTGATGGGATAGTCGGATTTGTCCATGTATTTGATACTTTCCCGGGTTGATTGCCATGGATTTGCGGGATATGGCATTA	CCTTTCTCTGTGCTGACTGCGGGGGGATGGGGATCTGGGTGGGGGTTCGCTACGATTCTCTGCTTGATGTGGAGACGGGCGGTTGAGATCGGAACTTGTTGGTGATAGATCTGCCTGTATGCTTCGTGTTGCATTGAATGGTGCTTAGATCTGTGGGATTGGTGATGGGATAGTCGGATTTGTCCATGTATTTGATACTTTCCCGGGTTGATTGCCATGGATTTGCGGGATATGGCATTA
CCTTTCTCTGTGCTGACTGCGGGGGGATGGGGATCTGGGTGGGGGTTCGCTACGATTCTCTGCTTGATGTGGA---GGGCGGTTGAGATCGGAACTTGTTGGTGATAGATCTGCCTGTATGCTTCGTGTTGCATTGAATGGTGCTTAGATCTGTGGGATTGGTGATGGGATAGTCGGATTTGTCCATGTATTTGATACTTTCCCGGGTTGATTGCCATGGATTTGCGGGATATGGCATTA	2528	33	Deletion	3.9	-3	PFSVLTAGGWGSGWGFATILCLMWRAVEIGTCW*	PFSVLTAGGWGSGWGFATILCLMWRRAVEIGTCW*	CCTTTCTCTGTGCTGACTGCGGGGGGATGGGGATCTGGGTGGGGGTTCGCTACGATTCTCTGCTTGATGTGGA---GGGCGGTTGAGATCGGAACTTGTTGGTGATAGATCTGCCTGTATGCTTCGTGTTGCATTGAATGGTGCTTAGATCTGTGGGATTGGTGATGGGATAGTCGGATTTGTCCATGTATTTGATACTTTCCCGGGTTGATTGCCATGGATTTGCGGGATATGGCATTA	CCTTTCTCTGTGCTGACTGCGGGGGGATGGGGATCTGGGTGGGGGTTCGCTACGATTCTCTGCTTGATGTGGAGACGGGCGGTTGAGATCGGAACTTGTTGGTGATAGATCTGCCTGTATGCTTCGTGTTGCATTGAATGGTGCTTAGATCTGTGGGATTGGTGATGGGATAGTCGGATTTGTCCATGTATTTGATACTTTCCCGGGTTGATTGCCATGGATTTGCGGGATATGGCATTA
CCTTTCTCTGTGCTGACTGCGGGGGGATGGGGATCTGGGTGGGGGTTCGCTACGATTCTCTGC-------------------TTGAGATCGGAACTTGTTGGTGATAGATCTGCCTGTATGCTTCGTGTTGCATTGAATGGTGCTTAGATCTGTGGGATTGGTGATGGGATAGTCGGATTTGTCCATGTATTTGATACTTTCCCGGGTTGATTGCCATGGATTTGCGGGATATGGCATTA	1660	33	Deletion	2.56	-19	PFSVLTAGGWGSGWGFATILCLRSELVGDRSACMLRVALNGA*	PFSVLTAGGWGSGWGFATILCLMWRRAVEIGTCW*	CCTTTCTCTGTGCTGACTGCGGGGGGATGGGGATCTGGGTGGGGGTTCGCTACGATTCTCTGC-------------------TTGAGATCGGAACTTGTTGGTGATAGATCTGCCTGTATGCTTCGTGTTGCATTGAATGGTGCTTAGATCTGTGGGATTGGTGATGGGATAGTCGGATTTGTCCATGTATTTGATACTTTCCCGGGTTGATTGCCATGGATTTGCGGGATATGGCATTA	CCTTTCTCTGTGCTGACTGCGGGGGGATGGGGATCTGGGTGGGGGTTCGCTACGATTCTCTGCTTGATGTGGAGACGGGCGGTTGAGATCGGAACTTGTTGGTGATAGATCTGCCTGTATGCTTCGTGTTGCATTGAATGGTGCTTAGATCTGTGGGATTGGTGATGGGATAGTCGGATTTGTCCATGTATTTGATACTTTCCCGGGTTGATTGCCATGGATTTGCGGGATATGGCATTA
CCTTTCTCTGTGCTGACTGCGGGGGGATGGGGATCTGGGTGGGGGTTCGCTACGATTCTCTGCTTGATGTG-------------GAGATCGGAACTTGTTGGTGATAGATCTGCCTGTATGCTTCGTGTTGCATTGAATGGTGCTTAGATCTGTGGGATTGGTGATGGGATAGTCGGATTTGTCCATGTATTTGATACTTTCCCGGGTTGATTGCCATGGATTTGCGGGATATGGCATTA	1463	33	Deletion	2.25	-13	PFSVLTAGGWGSGWGFATILCLMWRSELVGDRSACMLRVALNGA*	PFSVLTAGGWGSGWGFATILCLMWRRAVEIGTCW*	CCTTTCTCTGTGCTGACTGCGGGGGGATGGGGATCTGGGTGGGGGTTCGCTACGATTCTCTGCTTGATGTG-------------GAGATCGGAACTTGTTGGTGATAGATCTGCCTGTATGCTTCGTGTTGCATTGAATGGTGCTTAGATCTGTGGGATTGGTGATGGGATAGTCGGATTTGTCCATGTATTTGATACTTTCCCGGGTTGATTGCCATGGATTTGCGGGATATGGCATTA	CCTTTCTCTGTGCTGACTGCGGGGGGATGGGGATCTGGGTGGGGGTTCGCTACGATTCTCTGCTTGATGTGGAGACGGGCGGTTGAGATCGGAACTTGTTGGTGATAGATCTGCCTGTATGCTTCGTGTTGCATTGAATGGTGCTTAGATCTGTGGGATTGGTGATGGGATAGTCGGATTTGTCCATGTATTTGATACTTTCCCGGGTTGATTGCCATGGATTTGCGGGATATGGCATTA
CCTTTCTCTGTGCTGACTGCGGGGGGATGGGGATCTGGGTGGGGGTTCGCTACGATTCTCTGCTT------------GGCGGTTGAGATCGGAACTTGTTGGTGATAGATCTGCCTGTATGCTTCGTGTTGCATTGAATGGTGCTTAGATCTGTGGGATTGGTGATGGGATAGTCGGATTTGTCCATGTATTTGATACTTTCCCGGGTTGATTGCCATGGATTTGCGGGATATGGCATTA	554	33	Deletion	0.85	-12	PFSVLTAGGWGSGWGFATILCLAVEIGTCW*	PFSVLTAGGWGSGWGFATILCLMWRRAVEIGTCW*	CCTTTCTCTGTGCTGACTGCGGGGGGATGGGGATCTGGGTGGGGGTTCGCTACGATTCTCTGCTT------------GGCGGTTGAGATCGGAACTTGTTGGTGATAGATCTGCCTGTATGCTTCGTGTTGCATTGAATGGTGCTTAGATCTGTGGGATTGGTGATGGGATAGTCGGATTTGTCCATGTATTTGATACTTTCCCGGGTTGATTGCCATGGATTTGCGGGATATGGCATTA	CCTTTCTCTGTGCTGACTGCGGGGGGATGGGGATCTGGGTGGGGGTTCGCTACGATTCTCTGCTTGATGTGGAGACGGGCGGTTGAGATCGGAACTTGTTGGTGATAGATCTGCCTGTATGCTTCGTGTTGCATTGAATGGTGCTTAGATCTGTGGGATTGGTGATGGGATAGTCGGATTTGTCCATGTATTTGATACTTTCCCGGGTTGATTGCCATGGATTTGCGGGATATGGCATTA
CCTTTCTCTGTGCTGACTGCGGGGGGATGGGGATCTGGGTGGG-------------------------------------GGTTGAGATCGGAACTTGTTGGTGATAGATCTGCCTGTATGCTTCGTGTTGCATTGAATGGTGCTTAGATCTGTGGGATTGGTGATGGGATAGTCGGATTTGTCCATGTATTTGATACTTTCCCGGGTTGATTGCCATGGATTTGCGGGATATGGCATTA	502	34	Deletion	0.77	-37	PFSVLTAGGWGSGWGLRSELVGDRSACMLRVALNGA*	PFSVLTAGGWGSGWGFATILCLMWRRAVEIGTCW*	CCTTTCTCTGTGCTGACTGCGGGGGGATGGGGATCTGGGTGGG-------------------------------------GGTTGAGATCGGAACTTGTTGGTGATAGATCTGCCTGTATGCTTCGTGTTGCATTGAATGGTGCTTAGATCTGTGGGATTGGTGATGGGATAGTCGGATTTGTCCATGTATTTGATACTTTCCCGGGTTGATTGCCATGGATTTGCGGGATATGGCATTA	CCTTTCTCTGTGCTGACTGCGGGGGGATGGGGATCTGGGTGGGGGTTCGCTACGATTCTCTGCTTGATGTGGAGACGGGCGGTTGAGATCGGAACTTGTTGGTGATAGATCTGCCTGTATGCTTCGTGTTGCATTGAATGGTGCTTAGATCTGTGGGATTGGTGATGGGATAGTCGGATTTGTCCATGTATTTGATACTTTCCCGGGTTGATTGCCATGGATTTGCGGGATATGGCATTA
CCTTTCTCTGTGCTGACTGCGGGGGGATGGGGATCTGGGTGGGGGTTCGCTACGATTCTCTG-------------CGGGCGGTTGAGATCGGAACTTGTTGGTGATAGATCTGCCTGTATGCTTCGTGTTGCATTGAATGGTGCTTAGATCTGTGGGATTGGTGATGGGATAGTCGGATTTGTCCATGTATTTGATACTTTCCCGGGTTGATTGCCATGGATTTGCGGGATATGGCATTA	356	33	Deletion	0.55	-13	PFSVLTAGGWGSGWGFATILCGRLRSELVGDRSACMLRVALNGA*	PFSVLTAGGWGSGWGFATILCLMWRRAVEIGTCW*	CCTTTCTCTGTGCTGACTGCGGGGGGATGGGGATCTGGGTGGGGGTTCGCTACGATTCTCTG-------------CGGGCGGTTGAGATCGGAACTTGTTGGTGATAGATCTGCCTGTATGCTTCGTGTTGCATTGAATGGTGCTTAGATCTGTGGGATTGGTGATGGGATAGTCGGATTTGTCCATGTATTTGATACTTTCCCGGGTTGATTGCCATGGATTTGCGGGATATGGCATTA	CCTTTCTCTGTGCTGACTGCGGGGGGATGGGGATCTGGGTGGGGGTTCGCTACGATTCTCTGCTTGATGTGGAGACGGGCGGTTGAGATCGGAACTTGTTGGTGATAGATCTGCCTGTATGCTTCGTGTTGCATTGAATGGTGCTTAGATCTGTGGGATTGGTGATGGGATAGTCGGATTTGTCCATGTATTTGATACTTTCCCGGGTTGATTGCCATGGATTTGCGGGATATGGCATTA
CCTTTCTCTGTGCTGACTGCGGGGGGATGGGGATCTGGGTGGGGGTTCGCTACGATTCTCTGCTTGATGTGGAGACGgGGCGGTTGAGATCGGAACTTGTTGGTGATAGATCTGCCTGTATGCTTCGTGTTGCATTGAATGGTGCTTAGATCTGTGGGATTGGTGATGGGATAGTCGGATTTGTCCATGTATTTGATACTTTCCCGGGTTGATTGCCATGGATTTGCGGGATATGGCATTA	349	32	Insertion	0.54	1	PFSVLTAGGWGSGWGFATILCLMWRRGG*	PFSVLTAGGWGSGWGFATILCLMWRRAVEIGTCW*	CCTTTCTCTGTGCTGACTGCGGGGGGATGGGGATCTGGGTGGGGGTTCGCTACGATTCTCTGCTTGATGTGGAGACGGGGCGGTTGAGATCGGAACTTGTTGGTGATAGATCTGCCTGTATGCTTCGTGTTGCATTGAATGGTGCTTAGATCTGTGGGATTGGTGATGGGATAGTCGGATTTGTCCATGTATTTGATACTTTCCCGGGTTGATTGCCATGGATTTGCGGGATATGGCATTA	CCTTTCTCTGTGCTGACTGCGGGGGGATGGGGATCTGGGTGGGGGTTCGCTACGATTCTCTGCTTGATGTGGAGACGGGCGGTTGAGATCGGAACTTGTTGGTGATAGATCTGCCTGTATGCTTCGTGTTGCATTGAATGGTGCTTAGATCTGTGGGATTGGTGATGGGATAGTCGGATTTGTCCATGTATTTGATACTTTCCCGGGTTGATTGCCATGGATTTGCGGGATATGGCATTA
CCTTTCTCTGTGCTGACTGCGGGGGGATGGGGATCTGGGTGGGGGTTCGCTACGATTCTCTGCTTGATGTGGAGA-GGGCGGTTGAGATCGGAACTTGTTGGTGATAGATCTGCCTGTATGCTTCGTGTTGCATTGAATGGTGCTTAGATCTGTGGGATTGGTGATGGGATAGTCGGATTTGTCCATGTATTTGATACTTTCCCGGGTTGATTGCCATGGATTTGCGGGATATGGCATTA	260	33	Deletion	0.4	-1	PFSVLTAGGWGSGWGFATILCLMWRGRLRSELVGDRSACMLRVALNGA*	PFSVLTAGGWGSGWGFATILCLMWRRAVEIGTCW*	CCTTTCTCTGTGCTGACTGCGGGGGGATGGGGATCTGGGTGGGGGTTCGCTACGATTCTCTGCTTGATGTGGAGA-GGGCGGTTGAGATCGGAACTTGTTGGTGATAGATCTGCCTGTATGCTTCGTGTTGCATTGAATGGTGCTTAGATCTGTGGGATTGGTGATGGGATAGTCGGATTTGTCCATGTATTTGATACTTTCCCGGGTTGATTGCCATGGATTTGCGGGATATGGCATTA	CCTTTCTCTGTGCTGACTGCGGGGGGATGGGGATCTGGGTGGGGGTTCGCTACGATTCTCTGCTTGATGTGGAGACGGGCGGTTGAGATCGGAACTTGTTGGTGATAGATCTGCCTGTATGCTTCGTGTTGCATTGAATGGTGCTTAGATCTGTGGGATTGGTGATGGGATAGTCGGATTTGTCCATGTATTTGATACTTTCCCGGGTTGATTGCCATGGATTTGCGGGATATGGCATTA
CCTTTCTCTGTGCTGACTGCGGGGGGATGGGGATCTGGGTGGGGGTTCGCTACGATTCTCTGCTTGATGTGGAGAC---------AGATCGGAACTTGTTGGTGATAGATCTGCCTGTATGCTTCGTGTTGCATTGAATGGTGCTTAGATCTGTGGGATTGGTGATGGGATAGTCGGATTTGTCCATGTATTTGATACTTTCCCGGGTTGATTGCCATGGATTTGCGGGATATGGCATTA	246	33	Deletion	0.38	-9	PFSVLTAGGWGSGWGFATILCLMWRQIGTCW*	PFSVLTAGGWGSGWGFATILCLMWRRAVEIGTCW*	CCTTTCTCTGTGCTGACTGCGGGGGGATGGGGATCTGGGTGGGGGTTCGCTACGATTCTCTGCTTGATGTGGAGAC---------AGATCGGAACTTGTTGGTGATAGATCTGCCTGTATGCTTCGTGTTGCATTGAATGGTGCTTAGATCTGTGGGATTGGTGATGGGATAGTCGGATTTGTCCATGTATTTGATACTTTCCCGGGTTGATTGCCATGGATTTGCGGGATATGGCATTA	CCTTTCTCTGTGCTGACTGCGGGGGGATGGGGATCTGGGTGGGGGTTCGCTACGATTCTCTGCTTGATGTGGAGACGGGCGGTTGAGATCGGAACTTGTTGGTGATAGATCTGCCTGTATGCTTCGTGTTGCATTGAATGGTGCTTAGATCTGTGGGATTGGTGATGGGATAGTCGGATTTGTCCATGTATTTGATACTTTCCCGGGTTGATTGCCATGGATTTGCGGGATATGGCATTA
CCTTTCTCTGTGCTGACTGCGGGGGGATGGGGATCTGGGTGGGGGTTCGCTACGATT------------------CGGGCGGTTGAGATCGGAACTTGTTGGTGATAGATCTGCCTGTATGCTTCGTGTTGCATTGAATGGTGCTTAGATCTGTGGGATTGGTGATGGGATAGTCGGATTTGTCCATGTATTTGATACTTTCCCGGGTTGATTGCCATGGATTTGCGGGATATGGCATTA	170	33	Deletion	0.26	-18	PFSVLTAGGWGSGWGFATIRAVEIGTCW*	PFSVLTAGGWGSGWGFATILCLMWRRAVEIGTCW*	CCTTTCTCTGTGCTGACTGCGGGGGGATGGGGATCTGGGTGGGGGTTCGCTACGATT------------------CGGGCGGTTGAGATCGGAACTTGTTGGTGATAGATCTGCCTGTATGCTTCGTGTTGCATTGAATGGTGCTTAGATCTGTGGGATTGGTGATGGGATAGTCGGATTTGTCCATGTATTTGATACTTTCCCGGGTTGATTGCCATGGATTTGCGGGATATGGCATTA	CCTTTCTCTGTGCTGACTGCGGGGGGATGGGGATCTGGGTGGGGGTTCGCTACGATTCTCTGCTTGATGTGGAGACGGGCGGTTGAGATCGGAACTTGTTGGTGATAGATCTGCCTGTATGCTTCGTGTTGCATTGAATGGTGCTTAGATCTGTGGGATTGGTGATGGGATAGTCGGATTTGTCCATGTATTTGATACTTTCCCGGGTTGATTGCCATGGATTTGCGGGATATGGCATTA
CCTTTCTCTGTGCTGACTGCGGGGGGATGGGGATCTGGGTGGGGGTTCGCTACGATTCTCTGCTTGATGTGGA-----------TAGATCTGAACTTGTTGGTGATAGATCTGCCTGTATGCTTCGTGTTGCATTGAATGGTGCTTAGATCTGTGGGATTGGTGATGGGATAGTCGGATTTGTCCATGTATTTGATACTTTCCCGGGTTGATTGCCATGGATTTGCGGGATATGGCATTA	143	33	Deletion	0.22	-11	PFSVLTAGGWGSGWGFATILCLMWIDLNLLVIDLPVCFVLH*	PFSVLTAGGWGSGWGFATILCLMWRRAVEIGTCW*	CCTTTCTCTGTGCTGACTGCGGGGGGATGGGGATCTGGGTGGGGGTTCGCTACGATTCTCTGCTTGATGTGGA-----------TAGATCTGAACTTGTTGGTGATAGATCTGCCTGTATGCTTCGTGTTGCATTGAATGGTGCTTAGATCTGTGGGATTGGTGATGGGATAGTCGGATTTGTCCATGTATTTGATACTTTCCCGGGTTGATTGCCATGGATTTGCGGGATATGGCATTA	CCTTTCTCTGTGCTGACTGCGGGGGGATGGGGATCTGGGTGGGGGTTCGCTACGATTCTCTGCTTGATGTGGAGACGGGCGGTTGAGATCGGAACTTGTTGGTGATAGATCTGCCTGTATGCTTCGTGTTGCATTGAATGGTGCTTAGATCTGTGGGATTGGTGATGGGATAGTCGGATTTGTCCATGTATTTGATACTTTCCCGGGTTGATTGCCATGGATTTGCGGGATATGGCATTA
CCTTTCTCTGTGCTGACTGCGGGGGGATGGGGATCTGGGTGGGGGTTCGCTACGATTCTCTGCTTGATGTGGAGACGGGCGGTTGAGATCGGAACTTGTTGGTGATAGATCTGCCTGTATGCTTCGTGTTGCATTGAATGGTGCTTAGATCTGTGGGATTGGTGATGGGATAGTCGGATTTGTCCATGTATTTGATACTTTCCCGGGTTGATTGCCATGGATTTGCGGGATAT-GCATTA	121	33	Deletion	0.19	-1	PFSVLTAGGWGSGWGFATILCLMWRRAVEIGTCW*	PFSVLTAGGWGSGWGFATILCLMWRRAVEIGTCW*	CCTTTCTCTGTGCTGACTGCGGGGGGATGGGGATCTGGGTGGGGGTTCGCTACGATTCTCTGCTTGATGTGGAGACGGGCGGTTGAGATCGGAACTTGTTGGTGATAGATCTGCCTGTATGCTTCGTGTTGCATTGAATGGTGCTTAGATCTGTGGGATTGGTGATGGGATAGTCGGATTTGTCCATGTATTTGATACTTTCCCGGGTTGATTGCCATGGATTTGCGGGATAT-GCATTA	CCTTTCTCTGTGCTGACTGCGGGGGGATGGGGATCTGGGTGGGGGTTCGCTACGATTCTCTGCTTGATGTGGAGACGGGCGGTTGAGATCGGAACTTGTTGGTGATAGATCTGCCTGTATGCTTCGTGTTGCATTGAATGGTGCTTAGATCTGTGGGATTGGTGATGGGATAGTCGGATTTGTCCATGTATTTGATACTTTCCCGGGTTGATTGCCATGGATTTGCGGGATATGGCATTA
CCTTTCTCTGTGCTGACTGCGGGGGGATGGGGATCTGGGTGGGGGTTCGCTACGATTTTCTGCTTGATGTGGAGACGGGCGGTTGAGATCGGAACTTGTTGGTGATAGATCTGCCTGTATGCTTCGTGTTGCATTGAATGGTGCTTAGATCTGTGGGATTGGTGATGGGATAGTCGGATTTGTCCATGTATTTGATACTTTCCCGGGTTGATTGCCATGGATTTGCGGGATATGGCATTA	81	32	1 Base Change	0.12	0	PFSVLTAGGWGSGWGFATIFCLMWRRAVEIGTCW*	PFSVLTAGGWGSGWGFATILCLMWRRAVEIGTCW*	CCTTTCTCTGTGCTGACTGCGGGGGGATGGGGATCTGGGTGGGGGTTCGCTACGATTTTCTGCTTGATGTGGAGACGGGCGGTTGAGATCGGAACTTGTTGGTGATAGATCTGCCTGTATGCTTCGTGTTGCATTGAATGGTGCTTAGATCTGTGGGATTGGTGATGGGATAGTCGGATTTGTCCATGTATTTGATACTTTCCCGGGTTGATTGCCATGGATTTGCGGGATATGGCATTA	CCTTTCTCTGTGCTGACTGCGGGGGGATGGGGATCTGGGTGGGGGTTCGCTACGATTCTCTGCTTGATGTGGAGACGGGCGGTTGAGATCGGAACTTGTTGGTGATAGATCTGCCTGTATGCTTCGTGTTGCATTGAATGGTGCTTAGATCTGTGGGATTGGTGATGGGATAGTCGGATTTGTCCATGTATTTGATACTTTCCCGGGTTGATTGCCATGGATTTGCGGGATATGGCATTA
CCTTTCTCTGTGCTGACTGCGGGGGGATGGGGATCTGGGTGGGGGTTCGCTACGATTCTCTGCTTGATGTGGAGACTgGGCGGTTGAGATCGGAACTTGTTGGTGATAGATCTGCCTGTATGCTTCGTGTTGCATTGAATGGTGCTTAGATCTGTGGGATTGGTGATGGGATAGTCGGATTTGTCCATGTATTTGATACTTTCCCGGGTTGATTGCCATGGATTTGCGGGATAT-GCATTA	68	33	Insertion and Deletion	0.1	0	PFSVLTAGGWGSGWGFATILCLMWRLGG*	PFSVLTAGGWGSGWGFATILCLMWRRAVEIGTCW*	CCTTTCTCTGTGCTGACTGCGGGGGGATGGGGATCTGGGTGGGGGTTCGCTACGATTCTCTGCTTGATGTGGAGACTGGGCGGTTGAGATCGGAACTTGTTGGTGATAGATCTGCCTGTATGCTTCGTGTTGCATTGAATGGTGCTTAGATCTGTGGGATTGGTGATGGGATAGTCGGATTTGTCCATGTATTTGATACTTTCCCGGGTTGATTGCCATGGATTTGCGGGATAT-GCATTA	CCTTTCTCTGTGCTGACTGCGGGGGGATGGGGATCTGGGTGGGGGTTCGCTACGATTCTCTGCTTGATGTGGAGACGGGCGGTTGAGATCGGAACTTGTTGGTGATAGATCTGCCTGTATGCTTCGTGTTGCATTGAATGGTGCTTAGATCTGTGGGATTGGTGATGGGATAGTCGGATTTGTCCATGTATTTGATACTTTCCCGGGTTGATTGCCATGGATTTGCGGGATATGGCATTA
CCTTTCTCTGTGCTGACTGCGGGGGGATGGGGATCTGGGTGGGGGTTCGCTACGATTTTCTGCTTGATGTGG----GGGCGGTTGAGATCGGAACTTGTTGGTGATAGATCTGCCTGTATGCTTCGTGTTGCATTGAATGGTGCTTAGATCTGTGGGATTGGTGATGGGATAGTCGGATTTGTCCATGTATTTGATACTTTCCCGGGTTGATTGCCATGGATTTGCGGGATATGGCATTA	63	32	Deletion	0.1	-4	PFSVLTAGGWGSGWGFATIFCLMWGRLRSELVGDRSACMLRVALNGA*	PFSVLTAGGWGSGWGFATILCLMWRRAVEIGTCW*	CCTTTCTCTGTGCTGACTGCGGGGGGATGGGGATCTGGGTGGGGGTTCGCTACGATTTTCTGCTTGATGTGG----GGGCGGTTGAGATCGGAACTTGTTGGTGATAGATCTGCCTGTATGCTTCGTGTTGCATTGAATGGTGCTTAGATCTGTGGGATTGGTGATGGGATAGTCGGATTTGTCCATGTATTTGATACTTTCCCGGGTTGATTGCCATGGATTTGCGGGATATGGCATTA	CCTTTCTCTGTGCTGACTGCGGGGGGATGGGGATCTGGGTGGGGGTTCGCTACGATTCTCTGCTTGATGTGGAGACGGGCGGTTGAGATCGGAACTTGTTGGTGATAGATCTGCCTGTATGCTTCGTGTTGCATTGAATGGTGCTTAGATCTGTGGGATTGGTGATGGGATAGTCGGATTTGTCCATGTATTTGATACTTTCCCGGGTTGATTGCCATGGATTTGCGGGATATGGCATTA
CCTTTCTCTGTGCTGACTGCGGGGGGATGGGGATCTGGGTGGGGGTTCGCTACGATTCTCTGCTTGATGTGGAGACcGGGCGGTTGAGATCGGAACTTGTTGGTGATAGATCTGCCTGTATGCTTCGTGTTGCATTGAATGGTGCTTAGATCTGTGGGATTGGTGATGGGATAGTCGGATTTGTCCATGTATTTGATACTTTCCCGGGTTGATTGCCATGGATTTGCGGGATAT-GCATTA	57	33	Insertion and Deletion	0.09	0	PFSVLTAGGWGSGWGFATILCLMWRPGG*	PFSVLTAGGWGSGWGFATILCLMWRRAVEIGTCW*	CCTTTCTCTGTGCTGACTGCGGGGGGATGGGGATCTGGGTGGGGGTTCGCTACGATTCTCTGCTTGATGTGGAGACCGGGCGGTTGAGATCGGAACTTGTTGGTGATAGATCTGCCTGTATGCTTCGTGTTGCATTGAATGGTGCTTAGATCTGTGGGATTGGTGATGGGATAGTCGGATTTGTCCATGTATTTGATACTTTCCCGGGTTGATTGCCATGGATTTGCGGGATAT-GCATTA	CCTTTCTCTGTGCTGACTGCGGGGGGATGGGGATCTGGGTGGGGGTTCGCTACGATTCTCTGCTTGATGTGGAGACGGGCGGTTGAGATCGGAACTTGTTGGTGATAGATCTGCCTGTATGCTTCGTGTTGCATTGAATGGTGCTTAGATCTGTGGGATTGGTGATGGGATAGTCGGATTTGTCCATGTATTTGATACTTTCCCGGGTTGATTGCCATGGATTTGCGGGATATGGCATTA
CCTTTCTCTGTGCTGACTGCGGGGGGATGGGGATCTGGGTGGGGGTTCGCTACGATTCTCTGCTTGATGTGG---CGGGCGGTTGAGATCGGAACTTGTTGGTGATAGATCTGCCTGTATGCTTCGTGTTGCATTGAATGGTGCTTAGATCTGTGGGATTGGTGATGGGATAGTCGGATTTGTCCATGTATTTGATACTTTCCCGGGTTGATTGCCATGGATTTGCGGGATAT-GCATTA	53	29	Deletion	0.08	-4	PFSVLTAGGWGSGWGFATILCLMWRAVEIGTCW*	PFSVLTAGGWGSGWGFATILCLMWRRAVEIGTCW*	CCTTTCTCTGTGCTGACTGCGGGGGGATGGGGATCTGGGTGGGGGTTCGCTACGATTCTCTGCTTGATGTGG---CGGGCGGTTGAGATCGGAACTTGTTGGTGATAGATCTGCCTGTATGCTTCGTGTTGCATTGAATGGTGCTTAGATCTGTGGGATTGGTGATGGGATAGTCGGATTTGTCCATGTATTTGATACTTTCCCGGGTTGATTGCCATGGATTTGCGGGATAT-GCATTA	CCTTTCTCTGTGCTGACTGCGGGGGGATGGGGATCTGGGTGGGGGTTCGCTACGATTCTCTGCTTGATGTGGAGACGGGCGGTTGAGATCGGAACTTGTTGGTGATAGATCTGCCTGTATGCTTCGTGTTGCATTGAATGGTGCTTAGATCTGTGGGATTGGTGATGGGATAGTCGGATTTGTCCATGTATTTGATACTTTCCCGGGTTGATTGCCATGGATTTGCGGGATATGGCATTA
CCTTTCTCTGTGCTGACTGCGGGGGGATGGGGATCTGGGTGGGGGTTCGCTACGATTCTCTGCTTGATGTGGAGACGGGCGGTTGAGATCGGAACTTGTTGGTGATAGATCTGCCTGTATGCTTCGTGTTGCATTGAATGGTGCTTAGATCTGTGGGATTGGTGATGGGATAGTCGGATTTGTCCATGTATTTGATACTTTCCCGGGTTGATTGCCATGGATTTGC-GGATATGGCATTA	49	33	Deletion	0.08	-1	PFSVLTAGGWGSGWGFATILCLMWRRAVEIGTCW*	PFSVLTAGGWGSGWGFATILCLMWRRAVEIGTCW*	CCTTTCTCTGTGCTGACTGCGGGGGGATGGGGATCTGGGTGGGGGTTCGCTACGATTCTCTGCTTGATGTGGAGACGGGCGGTTGAGATCGGAACTTGTTGGTGATAGATCTGCCTGTATGCTTCGTGTTGCATTGAATGGTGCTTAGATCTGTGGGATTGGTGATGGGATAGTCGGATTTGTCCATGTATTTGATACTTTCCCGGGTTGATTGCCATGGATTTGC-GGATATGGCATTA	CCTTTCTCTGTGCTGACTGCGGGGGGATGGGGATCTGGGTGGGGGTTCGCTACGATTCTCTGCTTGATGTGGAGACGGGCGGTTGAGATCGGAACTTGTTGGTGATAGATCTGCCTGTATGCTTCGTGTTGCATTGAATGGTGCTTAGATCTGTGGGATTGGTGATGGGATAGTCGGATTTGTCCATGTATTTGATACTTTCCCGGGTTGATTGCCATGGATTTGCGGGATATGGCATTA
CCTTTCTCTGTGCTGACTGCGGGGGGATGGGGATCTGGGTGGGGGTTCGCTACGATTCTCTGCTTGATGTGGAGACTgGGCGGTTGAGATCGGAACTTGTTGGTGATAGATCTGCCTGTATGCTTCGTGTTGCATTGAATGGTGCTTAGATCTGTGGGATTGGTGATGGGATAGTCGGATTTGTCCATGTATTTGATACTTTCCCGGGTTGATTGCCATGGATTTGC-GGATATGGCATTA	43	33	Insertion and Deletion	0.07	0	PFSVLTAGGWGSGWGFATILCLMWRLGG*	PFSVLTAGGWGSGWGFATILCLMWRRAVEIGTCW*	CCTTTCTCTGTGCTGACTGCGGGGGGATGGGGATCTGGGTGGGGGTTCGCTACGATTCTCTGCTTGATGTGGAGACTGGGCGGTTGAGATCGGAACTTGTTGGTGATAGATCTGCCTGTATGCTTCGTGTTGCATTGAATGGTGCTTAGATCTGTGGGATTGGTGATGGGATAGTCGGATTTGTCCATGTATTTGATACTTTCCCGGGTTGATTGCCATGGATTTGC-GGATATGGCATTA	CCTTTCTCTGTGCTGACTGCGGGGGGATGGGGATCTGGGTGGGGGTTCGCTACGATTCTCTGCTTGATGTGGAGACGGGCGGTTGAGATCGGAACTTGTTGGTGATAGATCTGCCTGTATGCTTCGTGTTGCATTGAATGGTGCTTAGATCTGTGGGATTGGTGATGGGATAGTCGGATTTGTCCATGTATTTGATACTTTCCCGGGTTGATTGCCATGGATTTGCGGGATATGGCATTA
CCTTTCTCTGTGCTGACTGCGGGGGGATGGGGATCTGGGTGGGGGTTCGCTACGATTTTCTGCTTGATGTGGAGACTgGGCGGTTGAGATCGGAACTTGTTGGTGATAGATCTGCCTGTATGCTTCGTGTTGCATTGAATGGTGCTTAGATCTGTGGGATTGGTGATGGGATAGTCGGATTTGTCCATGTATTTGATACTTTCCCGGGTTGATTGCCATGGATTTGCGGGATATGGCATTA	43	32	Insertion	0.07	1	PFSVLTAGGWGSGWGFATIFCLMWRLGG*	PFSVLTAGGWGSGWGFATILCLMWRRAVEIGTCW*	CCTTTCTCTGTGCTGACTGCGGGGGGATGGGGATCTGGGTGGGGGTTCGCTACGATTTTCTGCTTGATGTGGAGACTGGGCGGTTGAGATCGGAACTTGTTGGTGATAGATCTGCCTGTATGCTTCGTGTTGCATTGAATGGTGCTTAGATCTGTGGGATTGGTGATGGGATAGTCGGATTTGTCCATGTATTTGATACTTTCCCGGGTTGATTGCCATGGATTTGCGGGATATGGCATTA	CCTTTCTCTGTGCTGACTGCGGGGGGATGGGGATCTGGGTGGGGGTTCGCTACGATTCTCTGCTTGATGTGGAGACGGGCGGTTGAGATCGGAACTTGTTGGTGATAGATCTGCCTGTATGCTTCGTGTTGCATTGAATGGTGCTTAGATCTGTGGGATTGGTGATGGGATAGTCGGATTTGTCCATGTATTTGATACTTTCCCGGGTTGATTGCCATGGATTTGCGGGATATGGCATTA
CCTTTCTCTGTGCTGACTGCGGGGGGATGGGGATCTGGGTGGGGGTTCGCTACGATTCTCTGCTTGATGTGGAGACcGGGCGGTTGAGATCGGAACTTGTTGGTGATAGATCTGCCTGTATGCTTCGTGTTGCATTGAATGGTGCTTAGATCTGTGGGATTGGTGATGGGATAGTCGGATTTGTCCATGTATTTGATACTTTCCCGGGTTGATTGCCATGGATTTGC-GGATATGGCATTA	40	33	Insertion and Deletion	0.06	0	PFSVLTAGGWGSGWGFATILCLMWRPGG*	PFSVLTAGGWGSGWGFATILCLMWRRAVEIGTCW*	CCTTTCTCTGTGCTGACTGCGGGGGGATGGGGATCTGGGTGGGGGTTCGCTACGATTCTCTGCTTGATGTGGAGACCGGGCGGTTGAGATCGGAACTTGTTGGTGATAGATCTGCCTGTATGCTTCGTGTTGCATTGAATGGTGCTTAGATCTGTGGGATTGGTGATGGGATAGTCGGATTTGTCCATGTATTTGATACTTTCCCGGGTTGATTGCCATGGATTTGC-GGATATGGCATTA	CCTTTCTCTGTGCTGACTGCGGGGGGATGGGGATCTGGGTGGGGGTTCGCTACGATTCTCTGCTTGATGTGGAGACGGGCGGTTGAGATCGGAACTTGTTGGTGATAGATCTGCCTGTATGCTTCGTGTTGCATTGAATGGTGCTTAGATCTGTGGGATTGGTGATGGGATAGTCGGATTTGTCCATGTATTTGATACTTTCCCGGGTTGATTGCCATGGATTTGCGGGATATGGCATTA
CCTTTCTCTGTGCTGACTGCGGGGGGATGGGGATCTGGGTGGGGGTTCGCTACGATTCTCTGCTTGATGTGGGGACGGGCGGTTGAGATCGGAACTTGTTGGTGATAGATCTGCCTGTATGCTTCGTGTTGCATTGAATGGTGCTTAGATCTGTGGGATTGGTGATGGGATAGTCGGATTTGTCCATGTATTTGATACTTTCCCGGGTTGATTGCCATGGATTTGCGGGATATGGCATTA	40	33	1 Base Change	0.06	0	PFSVLTAGGWGSGWGFATILCLMWGRAVEIGTCW*	PFSVLTAGGWGSGWGFATILCLMWRRAVEIGTCW*	CCTTTCTCTGTGCTGACTGCGGGGGGATGGGGATCTGGGTGGGGGTTCGCTACGATTCTCTGCTTGATGTGGGGACGGGCGGTTGAGATCGGAACTTGTTGGTGATAGATCTGCCTGTATGCTTCGTGTTGCATTGAATGGTGCTTAGATCTGTGGGATTGGTGATGGGATAGTCGGATTTGTCCATGTATTTGATACTTTCCCGGGTTGATTGCCATGGATTTGCGGGATATGGCATTA	CCTTTCTCTGTGCTGACTGCGGGGGGATGGGGATCTGGGTGGGGGTTCGCTACGATTCTCTGCTTGATGTGGAGACGGGCGGTTGAGATCGGAACTTGTTGGTGATAGATCTGCCTGTATGCTTCGTGTTGCATTGAATGGTGCTTAGATCTGTGGGATTGGTGATGGGATAGTCGGATTTGTCCATGTATTTGATACTTTCCCGGGTTGATTGCCATGGATTTGCGGGATATGGCATTA
CCTTTCTCTGTGCTGACTGCGGGGGGATGGGGATCTGGGTGGGGGTTCGCTACGATTCTCTGCTTGATGTGGAGACGGGCGGTTGAGATCGGAACTTGTTGGTGATAGATCTGCCTGTATGCCTCGTGTTGCATTGAATGGTGCTTAGATCTGTGGGATTGGTGATGGGATAGTCGGATTTGTCCATGTATTTGATACTTTCCCGGGTTGATTGCCATGGATTTGCGGGATATGGCATTA	39	33	1 Base Change	0.06	0	PFSVLTAGGWGSGWGFATILCLMWRRAVEIGTCW*	PFSVLTAGGWGSGWGFATILCLMWRRAVEIGTCW*	CCTTTCTCTGTGCTGACTGCGGGGGGATGGGGATCTGGGTGGGGGTTCGCTACGATTCTCTGCTTGATGTGGAGACGGGCGGTTGAGATCGGAACTTGTTGGTGATAGATCTGCCTGTATGCCTCGTGTTGCATTGAATGGTGCTTAGATCTGTGGGATTGGTGATGGGATAGTCGGATTTGTCCATGTATTTGATACTTTCCCGGGTTGATTGCCATGGATTTGCGGGATATGGCATTA	CCTTTCTCTGTGCTGACTGCGGGGGGATGGGGATCTGGGTGGGGGTTCGCTACGATTCTCTGCTTGATGTGGAGACGGGCGGTTGAGATCGGAACTTGTTGGTGATAGATCTGCCTGTATGCTTCGTGTTGCATTGAATGGTGCTTAGATCTGTGGGATTGGTGATGGGATAGTCGGATTTGTCCATGTATTTGATACTTTCCCGGGTTGATTGCCATGGATTTGCGGGATATGGCATTA
CCTTTCTCTGTGCTGACTGCGGGGGGATGGGGATCTGGGT-------------------------------------GGCGGTTGAGATCGGAACTTGTTGGTGATAGATCTGCCTGTATGCTTCGTGTTGCATTGAATGGTGCTTAGATCTGTGGGATTGGTGATGGGATAGTCGGATTTGTCCATGTATTTGATACTTTCCCGGGTTGATTGCCATGGATTTGCGGGATATGGCATTA	36	34	Deletion	0.06	-37	PFSVLTAGGWGSGWRLRSELVGDRSACMLRVALNGA*	PFSVLTAGGWGSGWGFATILCLMWRRAVEIGTCW*	CCTTTCTCTGTGCTGACTGCGGGGGGATGGGGATCTGGGT-------------------------------------GGCGGTTGAGATCGGAACTTGTTGGTGATAGATCTGCCTGTATGCTTCGTGTTGCATTGAATGGTGCTTAGATCTGTGGGATTGGTGATGGGATAGTCGGATTTGTCCATGTATTTGATACTTTCCCGGGTTGATTGCCATGGATTTGCGGGATATGGCATTA	CCTTTCTCTGTGCTGACTGCGGGGGGATGGGGATCTGGGTGGGGGTTCGCTACGATTCTCTGCTTGATGTGGAGACGGGCGGTTGAGATCGGAACTTGTTGGTGATAGATCTGCCTGTATGCTTCGTGTTGCATTGAATGGTGCTTAGATCTGTGGGATTGGTGATGGGATAGTCGGATTTGTCCATGTATTTGATACTTTCCCGGGTTGATTGCCATGGATTTGCGGGATATGGCATTA
CCTTTCTCTGTGCTGACTGCGGGGGGATGGGGATCTGGGTGGGGGTTCGCTACGATTCTCTGCTTGATGTGGAGACGGGCGGTTGAGATCGGAACTTGTTGGTGATAGATCTGCCTGTATGCTTCGTGTTGCATTGAATGGTGCTTAGATCTGTGGGGTTGGTGATGGGATAGTCGGATTTGTCCATGTATTTGATACTTTCCCGGGTTGATTGCCATGGATTTGCGGGATATGGCATTA	35	33	1 Base Change	0.05	0	PFSVLTAGGWGSGWGFATILCLMWRRAVEIGTCW*	PFSVLTAGGWGSGWGFATILCLMWRRAVEIGTCW*	CCTTTCTCTGTGCTGACTGCGGGGGGATGGGGATCTGGGTGGGGGTTCGCTACGATTCTCTGCTTGATGTGGAGACGGGCGGTTGAGATCGGAACTTGTTGGTGATAGATCTGCCTGTATGCTTCGTGTTGCATTGAATGGTGCTTAGATCTGTGGGGTTGGTGATGGGATAGTCGGATTTGTCCATGTATTTGATACTTTCCCGGGTTGATTGCCATGGATTTGCGGGATATGGCATTA	CCTTTCTCTGTGCTGACTGCGGGGGGATGGGGATCTGGGTGGGGGTTCGCTACGATTCTCTGCTTGATGTGGAGACGGGCGGTTGAGATCGGAACTTGTTGGTGATAGATCTGCCTGTATGCTTCGTGTTGCATTGAATGGTGCTTAGATCTGTGGGATTGGTGATGGGATAGTCGGATTTGTCCATGTATTTGATACTTTCCCGGGTTGATTGCCATGGATTTGCGGGATATGGCATTA
CCTTTCTCTGTGCTGACTGCGGGGGGATGGGGATCTGGGTGGGGGTTCGCTACGATTTTCTGCTTGATGTGG---CGGGCGGTTGAGATCGGAACTTGTTGGTGATAGATCTGCCTGTATGCTTCGTGTTGCATTGAATGGTGCTTAGATCTGTGGGATTGGTGATGGGATAGTCGGATTTGTCCATGTATTTGATACTTTCCCGGGTTGATTGCCATGGATTTGCGGGATATGGCATTA	34	29	Deletion	0.05	-3	PFSVLTAGGWGSGWGFATIFCLMWRAVEIGTCW*	PFSVLTAGGWGSGWGFATILCLMWRRAVEIGTCW*	CCTTTCTCTGTGCTGACTGCGGGGGGATGGGGATCTGGGTGGGGGTTCGCTACGATTTTCTGCTTGATGTGG---CGGGCGGTTGAGATCGGAACTTGTTGGTGATAGATCTGCCTGTATGCTTCGTGTTGCATTGAATGGTGCTTAGATCTGTGGGATTGGTGATGGGATAGTCGGATTTGTCCATGTATTTGATACTTTCCCGGGTTGATTGCCATGGATTTGCGGGATATGGCATTA	CCTTTCTCTGTGCTGACTGCGGGGGGATGGGGATCTGGGTGGGGGTTCGCTACGATTCTCTGCTTGATGTGGAGACGGGCGGTTGAGATCGGAACTTGTTGGTGATAGATCTGCCTGTATGCTTCGTGTTGCATTGAATGGTGCTTAGATCTGTGGGATTGGTGATGGGATAGTCGGATTTGTCCATGTATTTGATACTTTCCCGGGTTGATTGCCATGGATTTGCGGGATATGGCATTA
CCTTTCTCTGTGCTGACTGCGGGGGGATGGGGATCTGGGTGGGGGTTCGCTA---------------------------CGGTTGAGATCGGAACTTGTTGGTGATAGATCTGCCTGTATGCTTCGTGTTGCATTGAATGGTGCTTAGATCTGTGGGATTGGTGATGGGATAGTCGGATTTGTCCATGTATTTGATACTTTCCCGGGTTGATTGCCATGGATTTGCGGGATATGGCATTA	32	34	Deletion	0.05	-27	PFSVLTAGGWGSGWGFATVEIGTCW*	PFSVLTAGGWGSGWGFATILCLMWRRAVEIGTCW*	CCTTTCTCTGTGCTGACTGCGGGGGGATGGGGATCTGGGTGGGGGTTCGCTA---------------------------CGGTTGAGATCGGAACTTGTTGGTGATAGATCTGCCTGTATGCTTCGTGTTGCATTGAATGGTGCTTAGATCTGTGGGATTGGTGATGGGATAGTCGGATTTGTCCATGTATTTGATACTTTCCCGGGTTGATTGCCATGGATTTGCGGGATATGGCATTA	CCTTTCTCTGTGCTGACTGCGGGGGGATGGGGATCTGGGTGGGGGTTCGCTACGATTCTCTGCTTGATGTGGAGACGGGCGGTTGAGATCGGAACTTGTTGGTGATAGATCTGCCTGTATGCTTCGTGTTGCATTGAATGGTGCTTAGATCTGTGGGATTGGTGATGGGATAGTCGGATTTGTCCATGTATTTGATACTTTCCCGGGTTGATTGCCATGGATTTGCGGGATATGGCATTA
CCTTTCTCTGTGCTGACTGCGGGGGGATGGGGATCTGGGTGGGGGTTCGCTACGATTCTCTGCTTGATGTGGAGACGGGCGGTTGAGGTCGGAACTTGTTGGTGATAGATCTGCCTGTATGCTTCGTGTTGCATTGAATGGTGCTTAGATCTGTGGGATTGGTGATGGGATAGTCGGATTTGTCCATGTATTTGATACTTTCCCGGGTTGATTGCCATGGATTTGCGGGATATGGCATTA	32	32	1 Base Change	0.05	0	PFSVLTAGGWGSGWGFATILCLMWRRAVEVGTCW*	PFSVLTAGGWGSGWGFATILCLMWRRAVEIGTCW*	CCTTTCTCTGTGCTGACTGCGGGGGGATGGGGATCTGGGTGGGGGTTCGCTACGATTCTCTGCTTGATGTGGAGACGGGCGGTTGAGGTCGGAACTTGTTGGTGATAGATCTGCCTGTATGCTTCGTGTTGCATTGAATGGTGCTTAGATCTGTGGGATTGGTGATGGGATAGTCGGATTTGTCCATGTATTTGATACTTTCCCGGGTTGATTGCCATGGATTTGCGGGATATGGCATTA	CCTTTCTCTGTGCTGACTGCGGGGGGATGGGGATCTGGGTGGGGGTTCGCTACGATTCTCTGCTTGATGTGGAGACGGGCGGTTGAGATCGGAACTTGTTGGTGATAGATCTGCCTGTATGCTTCGTGTTGCATTGAATGGTGCTTAGATCTGTGGGATTGGTGATGGGATAGTCGGATTTGTCCATGTATTTGATACTTTCCCGGGTTGATTGCCATGGATTTGCGGGATATGGCATTA
CCTTTCTCTGTGCTGACTGCGGGGGGATGGGGATCTGGGTGGGGGCTCGCTACGATTCTCTGCTTGATGTGGAGACGGGCGGTTGAGATCGGAACTTGTTGGTGATAGATCTGCCTGTATGCTTCGTGTTGCATTGAATGGTGCTTAGATCTGTGGGATTGGTGATGGGATAGTCGGATTTGTCCATGTATTTGATACTTTCCCGGGTTGATTGCCATGGATTTGCGGGATATGGCATTA	31	33	1 Base Change	0.05	0	PFSVLTAGGWGSGWGLATILCLMWRRAVEIGTCW*	PFSVLTAGGWGSGWGFATILCLMWRRAVEIGTCW*	CCTTTCTCTGTGCTGACTGCGGGGGGATGGGGATCTGGGTGGGGGCTCGCTACGATTCTCTGCTTGATGTGGAGACGGGCGGTTGAGATCGGAACTTGTTGGTGATAGATCTGCCTGTATGCTTCGTGTTGCATTGAATGGTGCTTAGATCTGTGGGATTGGTGATGGGATAGTCGGATTTGTCCATGTATTTGATACTTTCCCGGGTTGATTGCCATGGATTTGCGGGATATGGCATTA	CCTTTCTCTGTGCTGACTGCGGGGGGATGGGGATCTGGGTGGGGGTTCGCTACGATTCTCTGCTTGATGTGGAGACGGGCGGTTGAGATCGGAACTTGTTGGTGATAGATCTGCCTGTATGCTTCGTGTTGCATTGAATGGTGCTTAGATCTGTGGGATTGGTGATGGGATAGTCGGATTTGTCCATGTATTTGATACTTTCCCGGGTTGATTGCCATGGATTTGCGGGATATGGCATTA
CCTTTCTCTGTGCTGACTGCGGGGGGATGGGGATCTGGGTGGGGGTTCGCTACGATTTTCTGCTTGATGTGGAGACcGGGCGGTTGAGATCGGAACTTGTTGGTGATAGATCTGCCTGTATGCTTCGTGTTGCATTGAATGGTGCTTAGATCTGTGGGATTGGTGATGGGATAGTCGGATTTGTCCATGTATTTGATACTTTCCCGGGTTGATTGCCATGGATTTGCGGGATATGGCATTA	31	32	Insertion	0.05	1	PFSVLTAGGWGSGWGFATIFCLMWRPGG*	PFSVLTAGGWGSGWGFATILCLMWRRAVEIGTCW*	CCTTTCTCTGTGCTGACTGCGGGGGGATGGGGATCTGGGTGGGGGTTCGCTACGATTTTCTGCTTGATGTGGAGACCGGGCGGTTGAGATCGGAACTTGTTGGTGATAGATCTGCCTGTATGCTTCGTGTTGCATTGAATGGTGCTTAGATCTGTGGGATTGGTGATGGGATAGTCGGATTTGTCCATGTATTTGATACTTTCCCGGGTTGATTGCCATGGATTTGCGGGATATGGCATTA	CCTTTCTCTGTGCTGACTGCGGGGGGATGGGGATCTGGGTGGGGGTTCGCTACGATTCTCTGCTTGATGTGGAGACGGGCGGTTGAGATCGGAACTTGTTGGTGATAGATCTGCCTGTATGCTTCGTGTTGCATTGAATGGTGCTTAGATCTGTGGGATTGGTGATGGGATAGTCGGATTTGTCCATGTATTTGATACTTTCCCGGGTTGATTGCCATGGATTTGCGGGATATGGCATTA
CCTTTCTCTGTGCTGACTGC-GGGGGATGGGGATCTGGGTGGGGGTTCGCTACGATTCTCTGCTTGATGTGGAGACGGGCGGTTGAGATCGGAACTTGTTGGTGATAGATCTGCCTGTATGCTTCGTGTTGCATTGAATGGTGCTTAGATCTGTGGGATTGGTGATGGGATAGTCGGATTTGTCCATGTATTTGATACTTTCCCGGGTTGATTGCCATGGATTTGCGGGATATGGCATTA	30	33	Deletion	0.05	-1	PFSVLTAGDGDLGGGSLRFSA*	PFSVLTAGGWGSGWGFATILCLMWRRAVEIGTCW*	CCTTTCTCTGTGCTGACTGC-GGGGGATGGGGATCTGGGTGGGGGTTCGCTACGATTCTCTGCTTGATGTGGAGACGGGCGGTTGAGATCGGAACTTGTTGGTGATAGATCTGCCTGTATGCTTCGTGTTGCATTGAATGGTGCTTAGATCTGTGGGATTGGTGATGGGATAGTCGGATTTGTCCATGTATTTGATACTTTCCCGGGTTGATTGCCATGGATTTGCGGGATATGGCATTA	CCTTTCTCTGTGCTGACTGCGGGGGGATGGGGATCTGGGTGGGGGTTCGCTACGATTCTCTGCTTGATGTGGAGACGGGCGGTTGAGATCGGAACTTGTTGGTGATAGATCTGCCTGTATGCTTCGTGTTGCATTGAATGGTGCTTAGATCTGTGGGATTGGTGATGGGATAGTCGGATTTGTCCATGTATTTGATACTTTCCCGGGTTGATTGCCATGGATTTGCGGGATATGGCATTA
CCTTTCTCTGTGCTGACTGCGGGGGGATGGGGATCTGGGTGGGGGTTCGCTACGATTCTCTGCTTGATGTGGAGACGGGCGGTTGAGATCGGAACTTGTTGGTGATAGATCTGCCTGTATGCTTCGTGTTGCATTGAATGGTGCTTAGATCTGTGGGATTGGTGATGGGGTAGTCGGATTTGTCCATGTATTTGATACTTTCCCGGGTTGATTGCCATGGATTTGCGGGATATGGCATTA	30	33	1 Base Change	0.05	0	PFSVLTAGGWGSGWGFATILCLMWRRAVEIGTCW*	PFSVLTAGGWGSGWGFATILCLMWRRAVEIGTCW*	CCTTTCTCTGTGCTGACTGCGGGGGGATGGGGATCTGGGTGGGGGTTCGCTACGATTCTCTGCTTGATGTGGAGACGGGCGGTTGAGATCGGAACTTGTTGGTGATAGATCTGCCTGTATGCTTCGTGTTGCATTGAATGGTGCTTAGATCTGTGGGATTGGTGATGGGGTAGTCGGATTTGTCCATGTATTTGATACTTTCCCGGGTTGATTGCCATGGATTTGCGGGATATGGCATTA	CCTTTCTCTGTGCTGACTGCGGGGGGATGGGGATCTGGGTGGGGGTTCGCTACGATTCTCTGCTTGATGTGGAGACGGGCGGTTGAGATCGGAACTTGTTGGTGATAGATCTGCCTGTATGCTTCGTGTTGCATTGAATGGTGCTTAGATCTGTGGGATTGGTGATGGGATAGTCGGATTTGTCCATGTATTTGATACTTTCCCGGGTTGATTGCCATGGATTTGCGGGATATGGCATTA
CCTTTCTCTGTGCTGACTGCGGGGGGATGGGGATCTGGGTGGGGGTTCGCTACGACTCTCTGCTTGATGTGGAGACTgGGCGGTTGAGATCGGAACTTGTTGGTGATAGATCTGCCTGTATGCTTCGTGTTGCATTGAATGGTGCTTAGATCTGTGGGATTGGTGATGGGATAGTCGGATTTGTCCATGTATTTGATACTTTCCCGGGTTGATTGCCATGGATTTGCGGGATATGGCATTA	29	33	Insertion	0.04	1	PFSVLTAGGWGSGWGFATTLCLMWRLGG*	PFSVLTAGGWGSGWGFATILCLMWRRAVEIGTCW*	CCTTTCTCTGTGCTGACTGCGGGGGGATGGGGATCTGGGTGGGGGTTCGCTACGACTCTCTGCTTGATGTGGAGACTGGGCGGTTGAGATCGGAACTTGTTGGTGATAGATCTGCCTGTATGCTTCGTGTTGCATTGAATGGTGCTTAGATCTGTGGGATTGGTGATGGGATAGTCGGATTTGTCCATGTATTTGATACTTTCCCGGGTTGATTGCCATGGATTTGCGGGATATGGCATTA	CCTTTCTCTGTGCTGACTGCGGGGGGATGGGGATCTGGGTGGGGGTTCGCTACGATTCTCTGCTTGATGTGGAGACGGGCGGTTGAGATCGGAACTTGTTGGTGATAGATCTGCCTGTATGCTTCGTGTTGCATTGAATGGTGCTTAGATCTGTGGGATTGGTGATGGGATAGTCGGATTTGTCCATGTATTTGATACTTTCCCGGGTTGATTGCCATGGATTTGCGGGATATGGCATTA
CCTTTCTCTGTGCTGACTGCGGGGGGATGGGGATCTGGGTGGGGGTTCGCTACGATTCCCTGCTTGATGTGGAGACGGGCGGTTGAGATCGGAACTTGTTGGTGATAGATCTGCCTGTATGCTTCGTGTTGCATTGAATGGTGCTTAGATCTGTGGGATTGGTGATGGGATAGTCGGATTTGTCCATGTATTTGATACTTTCCCGGGTTGATTGCCATGGATTTGCGGGATATGGCATTA	29	33	1 Base Change	0.04	0	PFSVLTAGGWGSGWGFATIPCLMWRRAVEIGTCW*	PFSVLTAGGWGSGWGFATILCLMWRRAVEIGTCW*	CCTTTCTCTGTGCTGACTGCGGGGGGATGGGGATCTGGGTGGGGGTTCGCTACGATTCCCTGCTTGATGTGGAGACGGGCGGTTGAGATCGGAACTTGTTGGTGATAGATCTGCCTGTATGCTTCGTGTTGCATTGAATGGTGCTTAGATCTGTGGGATTGGTGATGGGATAGTCGGATTTGTCCATGTATTTGATACTTTCCCGGGTTGATTGCCATGGATTTGCGGGATATGGCATTA	CCTTTCTCTGTGCTGACTGCGGGGGGATGGGGATCTGGGTGGGGGTTCGCTACGATTCTCTGCTTGATGTGGAGACGGGCGGTTGAGATCGGAACTTGTTGGTGATAGATCTGCCTGTATGCTTCGTGTTGCATTGAATGGTGCTTAGATCTGTGGGATTGGTGATGGGATAGTCGGATTTGTCCATGTATTTGATACTTTCCCGGGTTGATTGCCATGGATTTGCGGGATATGGCATTA
CCTTTCTCTGTGCTGACTGCGGGGGGATGGGGATCTGGGTGGGGGTTCGCTACGATTCTCTGCTTGATGTGG----GGGCGGTTGAGATCGGAACTTGTTGGTGATAGATCTGCCTGTATGCTTCGTGTTGCATTGAATGGTGCTTAGATCTGTGGGATTGGTGATGGGATAGTCGGATTTGTCCATGTATTTGATACTTTCCCGGGTTGATTGCCATGGATTTGCGGGATAT-GCATTA	29	32	Deletion	0.04	-5	PFSVLTAGGWGSGWGFATILCLMWGRLRSELVGDRSACMLRVALNGA*	PFSVLTAGGWGSGWGFATILCLMWRRAVEIGTCW*	CCTTTCTCTGTGCTGACTGCGGGGGGATGGGGATCTGGGTGGGGGTTCGCTACGATTCTCTGCTTGATGTGG----GGGCGGTTGAGATCGGAACTTGTTGGTGATAGATCTGCCTGTATGCTTCGTGTTGCATTGAATGGTGCTTAGATCTGTGGGATTGGTGATGGGATAGTCGGATTTGTCCATGTATTTGATACTTTCCCGGGTTGATTGCCATGGATTTGCGGGATAT-GCATTA	CCTTTCTCTGTGCTGACTGCGGGGGGATGGGGATCTGGGTGGGGGTTCGCTACGATTCTCTGCTTGATGTGGAGACGGGCGGTTGAGATCGGAACTTGTTGGTGATAGATCTGCCTGTATGCTTCGTGTTGCATTGAATGGTGCTTAGATCTGTGGGATTGGTGATGGGATAGTCGGATTTGTCCATGTATTTGATACTTTCCCGGGTTGATTGCCATGGATTTGCGGGATATGGCATTA
CCTTTCTCTGTGCTGACTGCGGGGGGATGGGGATCTGGGTGGGGGTTCGCTACGATTCTCTGCTTGATGTGGAGACAgGGCGGTTGAGATCGGAACTTGTTGGTGATAGATCTGCCTGTATGCTTCGTGTTGCATTGAATGGTGCTTAGATCTGTGGGATTGGTGATGGGATAGTCGGATTTGTCCATGTATTTGATACTTTCCCGGGTTGATTGCCATGGATTTGCGGGATATGGCATTA	29	33	Insertion	0.04	1	PFSVLTAGGWGSGWGFATILCLMWRQGG*	PFSVLTAGGWGSGWGFATILCLMWRRAVEIGTCW*	CCTTTCTCTGTGCTGACTGCGGGGGGATGGGGATCTGGGTGGGGGTTCGCTACGATTCTCTGCTTGATGTGGAGACAGGGCGGTTGAGATCGGAACTTGTTGGTGATAGATCTGCCTGTATGCTTCGTGTTGCATTGAATGGTGCTTAGATCTGTGGGATTGGTGATGGGATAGTCGGATTTGTCCATGTATTTGATACTTTCCCGGGTTGATTGCCATGGATTTGCGGGATATGGCATTA	CCTTTCTCTGTGCTGACTGCGGGGGGATGGGGATCTGGGTGGGGGTTCGCTACGATTCTCTGCTTGATGTGGAGACGGGCGGTTGAGATCGGAACTTGTTGGTGATAGATCTGCCTGTATGCTTCGTGTTGCATTGAATGGTGCTTAGATCTGTGGGATTGGTGATGGGATAGTCGGATTTGTCCATGTATTTGATACTTTCCCGGGTTGATTGCCATGGATTTGCGGGATATGGCATTA
CCTTTCTCTGTGCTGACTGCGGGGGGATGGGGATCTGGGTGGGGGTTCGCTACGATTCTCTGCTTGATGTGGAGACGGGCGGTTGAGATCGGAACTTGTTGGTGATAGATCTGCCTGTATGCTTCGTGTTGCATTGAATGGTGCTTAGATCTGTGGGATTGGTGATGGGATAGTCGGATTTGCCCATGTATTTGATACTTTCCCGGGTTGATTGCCATGGATTTGCGGGATATGGCATTA	29	33	1 Base Change	0.04	0	PFSVLTAGGWGSGWGFATILCLMWRRAVEIGTCW*	PFSVLTAGGWGSGWGFATILCLMWRRAVEIGTCW*	CCTTTCTCTGTGCTGACTGCGGGGGGATGGGGATCTGGGTGGGGGTTCGCTACGATTCTCTGCTTGATGTGGAGACGGGCGGTTGAGATCGGAACTTGTTGGTGATAGATCTGCCTGTATGCTTCGTGTTGCATTGAATGGTGCTTAGATCTGTGGGATTGGTGATGGGATAGTCGGATTTGCCCATGTATTTGATACTTTCCCGGGTTGATTGCCATGGATTTGCGGGATATGGCATTA	CCTTTCTCTGTGCTGACTGCGGGGGGATGGGGATCTGGGTGGGGGTTCGCTACGATTCTCTGCTTGATGTGGAGACGGGCGGTTGAGATCGGAACTTGTTGGTGATAGATCTGCCTGTATGCTTCGTGTTGCATTGAATGGTGCTTAGATCTGTGGGATTGGTGATGGGATAGTCGGATTTGTCCATGTATTTGATACTTTCCCGGGTTGATTGCCATGGATTTGCGGGATATGGCATTA
CCTTTCTCTGTGCTGACTGCGGGGGGATGGGGATCTGGGTGGGGGTTCGCTACGATTCTCTGCTTGATGTGGAGACGGGCGGTTGAGATCGGAACTTGTTGGTGATAGATCTGCCTGTATGCTTCGTGTTGCATTGAATGGTGCTTAGATCTGTGGGATTGGTGATGGGATAGTCGGATTTGTCCATGTATTTGATACTTTCCCGGGTTGATTGCCATGGATTTGCGGGATA-GGCATTA	29	33	Deletion	0.04	-1	PFSVLTAGGWGSGWGFATILCLMWRRAVEIGTCW*	PFSVLTAGGWGSGWGFATILCLMWRRAVEIGTCW*	CCTTTCTCTGTGCTGACTGCGGGGGGATGGGGATCTGGGTGGGGGTTCGCTACGATTCTCTGCTTGATGTGGAGACGGGCGGTTGAGATCGGAACTTGTTGGTGATAGATCTGCCTGTATGCTTCGTGTTGCATTGAATGGTGCTTAGATCTGTGGGATTGGTGATGGGATAGTCGGATTTGTCCATGTATTTGATACTTTCCCGGGTTGATTGCCATGGATTTGCGGGATA-GGCATTA	CCTTTCTCTGTGCTGACTGCGGGGGGATGGGGATCTGGGTGGGGGTTCGCTACGATTCTCTGCTTGATGTGGAGACGGGCGGTTGAGATCGGAACTTGTTGGTGATAGATCTGCCTGTATGCTTCGTGTTGCATTGAATGGTGCTTAGATCTGTGGGATTGGTGATGGGATAGTCGGATTTGTCCATGTATTTGATACTTTCCCGGGTTGATTGCCATGGATTTGCGGGATATGGCATTA
CCTTTCTCTGTGCTGACTGCGGGGGGATGGGGATCTGGGTGGGGGTTCGCTACGATTCTCTGCTTGATGTGGAGACGGGCGGTTGAGATCGGAACTTGTTGGTGATAGATCTGCCTGTATGCTTCGTGTTGCATTGAGTGGTGCTTAGATCTGTGGGATTGGTGATGGGATAGTCGGATTTGTCCATGTATTTGATACTTTCCCGGGTTGATTGCCATGGATTTGCGGGATATGGCATTA	29	34	1 Base Change	0.04	0	PFSVLTAGGWGSGWGFATILCLMWRRAVEIGTCW*	PFSVLTAGGWGSGWGFATILCLMWRRAVEIGTCW*	CCTTTCTCTGTGCTGACTGCGGGGGGATGGGGATCTGGGTGGGGGTTCGCTACGATTCTCTGCTTGATGTGGAGACGGGCGGTTGAGATCGGAACTTGTTGGTGATAGATCTGCCTGTATGCTTCGTGTTGCATTGAGTGGTGCTTAGATCTGTGGGATTGGTGATGGGATAGTCGGATTTGTCCATGTATTTGATACTTTCCCGGGTTGATTGCCATGGATTTGCGGGATATGGCATTA	CCTTTCTCTGTGCTGACTGCGGGGGGATGGGGATCTGGGTGGGGGTTCGCTACGATTCTCTGCTTGATGTGGAGACGGGCGGTTGAGATCGGAACTTGTTGGTGATAGATCTGCCTGTATGCTTCGTGTTGCATTGAATGGTGCTTAGATCTGTGGGATTGGTGATGGGATAGTCGGATTTGTCCATGTATTTGATACTTTCCCGGGTTGATTGCCATGGATTTGCGGGATATGGCATTA
CCTTTCTCTGTGCTGACTGCGGGGGGATGGGGATCTGGGTGGGGGTTCGCTACGATTCTCTGCTTGATGTGGAGGCGGGCGGTTGAGATCGGAACTTGTTGGTGATAGATCTGCCTGTATGCTTCGTGTTGCATTGAATGGTGCTTAGATCTGTGGGATTGGTGATGGGATAGTCGGATTTGTCCATGTATTTGATACTTTCCCGGGTTGATTGCCATGGATTTGCGGGATATGGCATTA	29	33	1 Base Change	0.04	0	PFSVLTAGGWGSGWGFATILCLMWRRAVEIGTCW*	PFSVLTAGGWGSGWGFATILCLMWRRAVEIGTCW*	CCTTTCTCTGTGCTGACTGCGGGGGGATGGGGATCTGGGTGGGGGTTCGCTACGATTCTCTGCTTGATGTGGAGGCGGGCGGTTGAGATCGGAACTTGTTGGTGATAGATCTGCCTGTATGCTTCGTGTTGCATTGAATGGTGCTTAGATCTGTGGGATTGGTGATGGGATAGTCGGATTTGTCCATGTATTTGATACTTTCCCGGGTTGATTGCCATGGATTTGCGGGATATGGCATTA	CCTTTCTCTGTGCTGACTGCGGGGGGATGGGGATCTGGGTGGGGGTTCGCTACGATTCTCTGCTTGATGTGGAGACGGGCGGTTGAGATCGGAACTTGTTGGTGATAGATCTGCCTGTATGCTTCGTGTTGCATTGAATGGTGCTTAGATCTGTGGGATTGGTGATGGGATAGTCGGATTTGTCCATGTATTTGATACTTTCCCGGGTTGATTGCCATGGATTTGCGGGATATGGCATTA
CCTTTCTCTGTGCTGACTGCGGGGGGATGGGGATCTGGGTGGGGGTTCGCTACGATTCTCTGCTTGATGTGGAGACGGGCGGCTGAGATCGGAACTTGTTGGTGATAGATCTGCCTGTATGCTTCGTGTTGCATTGAATGGTGCTTAGATCTGTGGGATTGGTGATGGGATAGTCGGATTTGTCCATGTATTTGATACTTTCCCGGGTTGATTGCCATGGATTTGCGGGATATGGCATTA	28	33	1 Base Change	0.04	0	PFSVLTAGGWGSGWGFATILCLMWRRAAEIGTCW*	PFSVLTAGGWGSGWGFATILCLMWRRAVEIGTCW*	CCTTTCTCTGTGCTGACTGCGGGGGGATGGGGATCTGGGTGGGGGTTCGCTACGATTCTCTGCTTGATGTGGAGACGGGCGGCTGAGATCGGAACTTGTTGGTGATAGATCTGCCTGTATGCTTCGTGTTGCATTGAATGGTGCTTAGATCTGTGGGATTGGTGATGGGATAGTCGGATTTGTCCATGTATTTGATACTTTCCCGGGTTGATTGCCATGGATTTGCGGGATATGGCATTA	CCTTTCTCTGTGCTGACTGCGGGGGGATGGGGATCTGGGTGGGGGTTCGCTACGATTCTCTGCTTGATGTGGAGACGGGCGGTTGAGATCGGAACTTGTTGGTGATAGATCTGCCTGTATGCTTCGTGTTGCATTGAATGGTGCTTAGATCTGTGGGATTGGTGATGGGATAGTCGGATTTGTCCATGTATTTGATACTTTCCCGGGTTGATTGCCATGGATTTGCGGGATATGGCATTA
CCTTTCTCTGTGCTGACTGC-GGGGGATGGGGATCTGGGTGGGGGTTCGCTACGATTCTCTGCTTGATGTGGAGACcGGGCGGTTGAGATCGGAACTTGTTGGTGATAGATCTGCCTGTATGCTTCGTGTTGCATTGAATGGTGCTTAGATCTGTGGGATTGGTGATGGGATAGTCGGATTTGTCCATGTATTTGATACTTTCCCGGGTTGATTGCCATGGATTTGCGGGATATGGCATTA	27	33	Insertion and Deletion	0.04	0	PFSVLTAGDGDLGGGSLRFSA*	PFSVLTAGGWGSGWGFATILCLMWRRAVEIGTCW*	CCTTTCTCTGTGCTGACTGC-GGGGGATGGGGATCTGGGTGGGGGTTCGCTACGATTCTCTGCTTGATGTGGAGACCGGGCGGTTGAGATCGGAACTTGTTGGTGATAGATCTGCCTGTATGCTTCGTGTTGCATTGAATGGTGCTTAGATCTGTGGGATTGGTGATGGGATAGTCGGATTTGTCCATGTATTTGATACTTTCCCGGGTTGATTGCCATGGATTTGCGGGATATGGCATTA	CCTTTCTCTGTGCTGACTGCGGGGGGATGGGGATCTGGGTGGGGGTTCGCTACGATTCTCTGCTTGATGTGGAGACGGGCGGTTGAGATCGGAACTTGTTGGTGATAGATCTGCCTGTATGCTTCGTGTTGCATTGAATGGTGCTTAGATCTGTGGGATTGGTGATGGGATAGTCGGATTTGTCCATGTATTTGATACTTTCCCGGGTTGATTGCCATGGATTTGCGGGATATGGCATTA
CCTTTCTCTGTGCTGACTGC-GGGGGATGGGGATCTGGGTGGGGGTTCGCTACGATTCTCTGCTTGATGTGGAGACTgGGCGGTTGAGATCGGAACTTGTTGGTGATAGATCTGCCTGTATGCTTCGTGTTGCATTGAATGGTGCTTAGATCTGTGGGATTGGTGATGGGATAGTCGGATTTGTCCATGTATTTGATACTTTCCCGGGTTGATTGCCATGGATTTGCGGGATATGGCATTA	27	33	Insertion and Deletion	0.04	0	PFSVLTAGDGDLGGGSLRFSA*	PFSVLTAGGWGSGWGFATILCLMWRRAVEIGTCW*	CCTTTCTCTGTGCTGACTGC-GGGGGATGGGGATCTGGGTGGGGGTTCGCTACGATTCTCTGCTTGATGTGGAGACTGGGCGGTTGAGATCGGAACTTGTTGGTGATAGATCTGCCTGTATGCTTCGTGTTGCATTGAATGGTGCTTAGATCTGTGGGATTGGTGATGGGATAGTCGGATTTGTCCATGTATTTGATACTTTCCCGGGTTGATTGCCATGGATTTGCGGGATATGGCATTA	CCTTTCTCTGTGCTGACTGCGGGGGGATGGGGATCTGGGTGGGGGTTCGCTACGATTCTCTGCTTGATGTGGAGACGGGCGGTTGAGATCGGAACTTGTTGGTGATAGATCTGCCTGTATGCTTCGTGTTGCATTGAATGGTGCTTAGATCTGTGGGATTGGTGATGGGATAGTCGGATTTGTCCATGTATTTGATACTTTCCCGGGTTGATTGCCATGGATTTGCGGGATATGGCATTA
CCTTTCTCTGTGCTGACTGCGGGGGGATGGGGATCTGGGTGGGGGTTCGCTACGATTCTCTGCTTGATGTGGAGACGGGCGGTTGAGATCGGAACTTGTTGGTGATAGATCTGCCTGTATGCTTCGTGTTGCATTGAATGGTGCTTAGACCTGTGGGATTGGTGATGGGATAGTCGGATTTGTCCATGTATTTGATACTTTCCCGGGTTGATTGCCATGGATTTGCGGGATATGGCATTA	27	33	1 Base Change	0.04	0	PFSVLTAGGWGSGWGFATILCLMWRRAVEIGTCW*	PFSVLTAGGWGSGWGFATILCLMWRRAVEIGTCW*	CCTTTCTCTGTGCTGACTGCGGGGGGATGGGGATCTGGGTGGGGGTTCGCTACGATTCTCTGCTTGATGTGGAGACGGGCGGTTGAGATCGGAACTTGTTGGTGATAGATCTGCCTGTATGCTTCGTGTTGCATTGAATGGTGCTTAGACCTGTGGGATTGGTGATGGGATAGTCGGATTTGTCCATGTATTTGATACTTTCCCGGGTTGATTGCCATGGATTTGCGGGATATGGCATTA	CCTTTCTCTGTGCTGACTGCGGGGGGATGGGGATCTGGGTGGGGGTTCGCTACGATTCTCTGCTTGATGTGGAGACGGGCGGTTGAGATCGGAACTTGTTGGTGATAGATCTGCCTGTATGCTTCGTGTTGCATTGAATGGTGCTTAGATCTGTGGGATTGGTGATGGGATAGTCGGATTTGTCCATGTATTTGATACTTTCCCGGGTTGATTGCCATGGATTTGCGGGATATGGCATTA
CCTTTCTCTGTGCTGACTGCGGGGGGATGGGGATCTGGGCGGGGGTTCGCTACGATTCTCTGCTTGATGTGGAGACTgGGCGGTTGAGATCGGAACTTGTTGGTGATAGATCTGCCTGTATGCTTCGTGTTGCATTGAATGGTGCTTAGATCTGTGGGATTGGTGATGGGATAGTCGGATTTGTCCATGTATTTGATACTTTCCCGGGTTGATTGCCATGGATTTGCGGGATATGGCATTA	26	32	Insertion	0.04	1	PFSVLTAGGWGSGRGFATILCLMWRLGG*	PFSVLTAGGWGSGWGFATILCLMWRRAVEIGTCW*	CCTTTCTCTGTGCTGACTGCGGGGGGATGGGGATCTGGGCGGGGGTTCGCTACGATTCTCTGCTTGATGTGGAGACTGGGCGGTTGAGATCGGAACTTGTTGGTGATAGATCTGCCTGTATGCTTCGTGTTGCATTGAATGGTGCTTAGATCTGTGGGATTGGTGATGGGATAGTCGGATTTGTCCATGTATTTGATACTTTCCCGGGTTGATTGCCATGGATTTGCGGGATATGGCATTA	CCTTTCTCTGTGCTGACTGCGGGGGGATGGGGATCTGGGTGGGGGTTCGCTACGATTCTCTGCTTGATGTGGAGACGGGCGGTTGAGATCGGAACTTGTTGGTGATAGATCTGCCTGTATGCTTCGTGTTGCATTGAATGGTGCTTAGATCTGTGGGATTGGTGATGGGATAGTCGGATTTGTCCATGTATTTGATACTTTCCCGGGTTGATTGCCATGGATTTGCGGGATATGGCATTA
CCTTTCTCTGTGCTGACTGCGGGGGGATGGGGATCTGGGTGGGGGTTCGCTACGATTCTCTGCTTGATGTGGAGACGGGCGGTTGAGATCGGAACTTGTTGGTGATAGATCTGCCTGTATGCTTCGTGTTGCATTGAATGGTGCTTAGATCTGTGGGATTGGTGATGGGATAGTCGGATTTGTCCATGTATTTGATACTTTCCCGGGCTGATTGCCATGGATTTGCGGGATATGGCATTA	26	33	1 Base Change	0.04	0	PFSVLTAGGWGSGWGFATILCLMWRRAVEIGTCW*	PFSVLTAGGWGSGWGFATILCLMWRRAVEIGTCW*	CCTTTCTCTGTGCTGACTGCGGGGGGATGGGGATCTGGGTGGGGGTTCGCTACGATTCTCTGCTTGATGTGGAGACGGGCGGTTGAGATCGGAACTTGTTGGTGATAGATCTGCCTGTATGCTTCGTGTTGCATTGAATGGTGCTTAGATCTGTGGGATTGGTGATGGGATAGTCGGATTTGTCCATGTATTTGATACTTTCCCGGGCTGATTGCCATGGATTTGCGGGATATGGCATTA	CCTTTCTCTGTGCTGACTGCGGGGGGATGGGGATCTGGGTGGGGGTTCGCTACGATTCTCTGCTTGATGTGGAGACGGGCGGTTGAGATCGGAACTTGTTGGTGATAGATCTGCCTGTATGCTTCGTGTTGCATTGAATGGTGCTTAGATCTGTGGGATTGGTGATGGGATAGTCGGATTTGTCCATGTATTTGATACTTTCCCGGGTTGATTGCCATGGATTTGCGGGATATGGCATTA
CCTTTCTCTGTGCTGACTGCGGGGGGATGGGGATCTGGGTGGGGGTTCGCTACGATTCTCTGCTTGATGTGG---CGGGCGGTTGAGATCGGAACTTGTTGGTGATAGATCTGCCTGTATGCTTCGTGTTGCATTGAATGGTGCTTAGATCTGTGGGATTGGTGATGGGATAGTCGGATTTGTCCATGTATTTGATACTTTCCCGGGTTGATTGCCATGGATTTGC-GGATATGGCATTA	25	29	Deletion	0.04	-4	PFSVLTAGGWGSGWGFATILCLMWRAVEIGTCW*	PFSVLTAGGWGSGWGFATILCLMWRRAVEIGTCW*	CCTTTCTCTGTGCTGACTGCGGGGGGATGGGGATCTGGGTGGGGGTTCGCTACGATTCTCTGCTTGATGTGG---CGGGCGGTTGAGATCGGAACTTGTTGGTGATAGATCTGCCTGTATGCTTCGTGTTGCATTGAATGGTGCTTAGATCTGTGGGATTGGTGATGGGATAGTCGGATTTGTCCATGTATTTGATACTTTCCCGGGTTGATTGCCATGGATTTGC-GGATATGGCATTA	CCTTTCTCTGTGCTGACTGCGGGGGGATGGGGATCTGGGTGGGGGTTCGCTACGATTCTCTGCTTGATGTGGAGACGGGCGGTTGAGATCGGAACTTGTTGGTGATAGATCTGCCTGTATGCTTCGTGTTGCATTGAATGGTGCTTAGATCTGTGGGATTGGTGATGGGATAGTCGGATTTGTCCATGTATTTGATACTTTCCCGGGTTGATTGCCATGGATTTGCGGGATATGGCATTA
CCTTTCTCTGTGCTGACTGCGGGGGGATGGGGATCTGGGTGGGGGTTCGCTACGATTCTCTGCTTGATGTGGA---GGGCGGTTGAGATCGGAACTTGTTGGTGATAGATCTGCCTGTATGCTTCGTGTTGCATTGAATGGTGCTTAGATCTGTGGGATTGGTGATGGGATAGTCGGATTTGTCCATGTATTTGATACTTTCCCGGGTTGATTGCCATGGATTTGCGGGATAT-GCATTA	25	33	Deletion	0.04	-4	PFSVLTAGGWGSGWGFATILCLMWRAVEIGTCW*	PFSVLTAGGWGSGWGFATILCLMWRRAVEIGTCW*	CCTTTCTCTGTGCTGACTGCGGGGGGATGGGGATCTGGGTGGGGGTTCGCTACGATTCTCTGCTTGATGTGGA---GGGCGGTTGAGATCGGAACTTGTTGGTGATAGATCTGCCTGTATGCTTCGTGTTGCATTGAATGGTGCTTAGATCTGTGGGATTGGTGATGGGATAGTCGGATTTGTCCATGTATTTGATACTTTCCCGGGTTGATTGCCATGGATTTGCGGGATAT-GCATTA	CCTTTCTCTGTGCTGACTGCGGGGGGATGGGGATCTGGGTGGGGGTTCGCTACGATTCTCTGCTTGATGTGGAGACGGGCGGTTGAGATCGGAACTTGTTGGTGATAGATCTGCCTGTATGCTTCGTGTTGCATTGAATGGTGCTTAGATCTGTGGGATTGGTGATGGGATAGTCGGATTTGTCCATGTATTTGATACTTTCCCGGGTTGATTGCCATGGATTTGCGGGATATGGCATTA
CCTTTCTCTGTGCTGACTGCGGGGGGATGGGGATCTGGGTGGGGGTTCGCTACGATTCTCTGCTTGATGTGGAGACGGGCGGTTGAGATCGGAACTTGTTGGTGATAGATCTGCCTGTATGCTTCGTGTTGCATTGAATGGTGCTTAGATCTGTGGGATTGGTGATGGGATAGTCGGATTTGTCCATGTACTTGATACTTTCCCGGGTTGATTGCCATGGATTTGCGGGATATGGCATTA	25	32	1 Base Change	0.04	0	PFSVLTAGGWGSGWGFATILCLMWRRAVEIGTCW*	PFSVLTAGGWGSGWGFATILCLMWRRAVEIGTCW*	CCTTTCTCTGTGCTGACTGCGGGGGGATGGGGATCTGGGTGGGGGTTCGCTACGATTCTCTGCTTGATGTGGAGACGGGCGGTTGAGATCGGAACTTGTTGGTGATAGATCTGCCTGTATGCTTCGTGTTGCATTGAATGGTGCTTAGATCTGTGGGATTGGTGATGGGATAGTCGGATTTGTCCATGTACTTGATACTTTCCCGGGTTGATTGCCATGGATTTGCGGGATATGGCATTA	CCTTTCTCTGTGCTGACTGCGGGGGGATGGGGATCTGGGTGGGGGTTCGCTACGATTCTCTGCTTGATGTGGAGACGGGCGGTTGAGATCGGAACTTGTTGGTGATAGATCTGCCTGTATGCTTCGTGTTGCATTGAATGGTGCTTAGATCTGTGGGATTGGTGATGGGATAGTCGGATTTGTCCATGTATTTGATACTTTCCCGGGTTGATTGCCATGGATTTGCGGGATATGGCATTA
CCTTTCTCTGTGCTGACTGCGGGGGGATGGGGATCTGGGTGGGGGTTCGCTACGATTCTCTGCTTGATGTGGAGACTgGGCGGTTGAGATCGGAACTTGTTGGTGATAGATCTGCCTGTATGCTTCGTGTTGCATTGAATGGTGCTTAGATCTGTGGGATTGGTGATGGGATAGTCGGATTTGTCCATGTATTTGATACTTTCCCGGGTTGATTGCCATGGATTTGCGGGATA-GGCATTA	25	33	Insertion and Deletion	0.04	0	PFSVLTAGGWGSGWGFATILCLMWRLGG*	PFSVLTAGGWGSGWGFATILCLMWRRAVEIGTCW*	CCTTTCTCTGTGCTGACTGCGGGGGGATGGGGATCTGGGTGGGGGTTCGCTACGATTCTCTGCTTGATGTGGAGACTGGGCGGTTGAGATCGGAACTTGTTGGTGATAGATCTGCCTGTATGCTTCGTGTTGCATTGAATGGTGCTTAGATCTGTGGGATTGGTGATGGGATAGTCGGATTTGTCCATGTATTTGATACTTTCCCGGGTTGATTGCCATGGATTTGCGGGATA-GGCATTA	CCTTTCTCTGTGCTGACTGCGGGGGGATGGGGATCTGGGTGGGGGTTCGCTACGATTCTCTGCTTGATGTGGAGACGGGCGGTTGAGATCGGAACTTGTTGGTGATAGATCTGCCTGTATGCTTCGTGTTGCATTGAATGGTGCTTAGATCTGTGGGATTGGTGATGGGATAGTCGGATTTGTCCATGTATTTGATACTTTCCCGGGTTGATTGCCATGGATTTGCGGGATATGGCATTA
CCTTTCTCTGTGCTGACTGCGGGGGGATGGGGATCTGGGTGGGGGTTCGCTACGATTCTCTGCTTGATGT--------------------GGAACTTGTTGGTGATAGATCTGCCTGTATGCTTCGTGTTGCATTGAATGGTGCTTAGATCTGTGGGATTGGTGATGGGATAGTCGGATTTGTCCATGTATTTGATACTTTCCCGGGTTGATTGCCATGGATTTGCGGGATATGGCATTA	24	33	Deletion	0.04	-20	PFSVLTAGGWGSGWGFATILCLMWNLLVIDLPVCFVLH*	PFSVLTAGGWGSGWGFATILCLMWRRAVEIGTCW*	CCTTTCTCTGTGCTGACTGCGGGGGGATGGGGATCTGGGTGGGGGTTCGCTACGATTCTCTGCTTGATGT--------------------GGAACTTGTTGGTGATAGATCTGCCTGTATGCTTCGTGTTGCATTGAATGGTGCTTAGATCTGTGGGATTGGTGATGGGATAGTCGGATTTGTCCATGTATTTGATACTTTCCCGGGTTGATTGCCATGGATTTGCGGGATATGGCATTA	CCTTTCTCTGTGCTGACTGCGGGGGGATGGGGATCTGGGTGGGGGTTCGCTACGATTCTCTGCTTGATGTGGAGACGGGCGGTTGAGATCGGAACTTGTTGGTGATAGATCTGCCTGTATGCTTCGTGTTGCATTGAATGGTGCTTAGATCTGTGGGATTGGTGATGGGATAGTCGGATTTGTCCATGTATTTGATACTTTCCCGGGTTGATTGCCATGGATTTGCGGGATATGGCATTA
CCTTTCTCTGTGCTGACTGCGGGGGGATGGGGATCTGGGTGGGGGTTCGCTACGATTCTCTGCTTGATGTGGAGACGGGCGGTTGAGATCGGAACTTGTTGGTGATAGATCTGCCTGTATGCTTCGTGTTGCATTGAATGGTGCTTAGATCTGCGGGATTGGTGATGGGATAGTCGGATTTGTCCATGTATTTGATACTTTCCCGGGTTGATTGCCATGGATTTGCGGGATATGGCATTA	24	33	1 Base Change	0.04	0	PFSVLTAGGWGSGWGFATILCLMWRRAVEIGTCW*	PFSVLTAGGWGSGWGFATILCLMWRRAVEIGTCW*	CCTTTCTCTGTGCTGACTGCGGGGGGATGGGGATCTGGGTGGGGGTTCGCTACGATTCTCTGCTTGATGTGGAGACGGGCGGTTGAGATCGGAACTTGTTGGTGATAGATCTGCCTGTATGCTTCGTGTTGCATTGAATGGTGCTTAGATCTGCGGGATTGGTGATGGGATAGTCGGATTTGTCCATGTATTTGATACTTTCCCGGGTTGATTGCCATGGATTTGCGGGATATGGCATTA	CCTTTCTCTGTGCTGACTGCGGGGGGATGGGGATCTGGGTGGGGGTTCGCTACGATTCTCTGCTTGATGTGGAGACGGGCGGTTGAGATCGGAACTTGTTGGTGATAGATCTGCCTGTATGCTTCGTGTTGCATTGAATGGTGCTTAGATCTGTGGGATTGGTGATGGGATAGTCGGATTTGTCCATGTATTTGATACTTTCCCGGGTTGATTGCCATGGATTTGCGGGATATGGCATTA
CCTTTCTCTGTGCTGACTGCGGGGGGATGGGGATCTGGGTGGGGGTTCGCTACGATTCTCTGCTTGATGTGGAGACGGGCGGTTGAGATCGGAACTTGTTGGTGATAGATCTGCCTGTATGCTTCGTGTTGCATTGAATGGTGCTTAGATCTGTGGGATTGGTGATGGGATAGTCGGATTTGTCCATGTATTTGATACTTTCCCGGGTTGATTGCCATGGATTTGCGGGAT-TGGCATTA	24	33	Deletion	0.04	-1	PFSVLTAGGWGSGWGFATILCLMWRRAVEIGTCW*	PFSVLTAGGWGSGWGFATILCLMWRRAVEIGTCW*	CCTTTCTCTGTGCTGACTGCGGGGGGATGGGGATCTGGGTGGGGGTTCGCTACGATTCTCTGCTTGATGTGGAGACGGGCGGTTGAGATCGGAACTTGTTGGTGATAGATCTGCCTGTATGCTTCGTGTTGCATTGAATGGTGCTTAGATCTGTGGGATTGGTGATGGGATAGTCGGATTTGTCCATGTATTTGATACTTTCCCGGGTTGATTGCCATGGATTTGCGGGAT-TGGCATTA	CCTTTCTCTGTGCTGACTGCGGGGGGATGGGGATCTGGGTGGGGGTTCGCTACGATTCTCTGCTTGATGTGGAGACGGGCGGTTGAGATCGGAACTTGTTGGTGATAGATCTGCCTGTATGCTTCGTGTTGCATTGAATGGTGCTTAGATCTGTGGGATTGGTGATGGGATAGTCGGATTTGTCCATGTATTTGATACTTTCCCGGGTTGATTGCCATGGATTTGCGGGATATGGCATTA
CCTTTC-CTGTGCTGACTGCGGGGGGATGGGGATCTGGGTGGGGGTTCGCTACGATTCTCTGCTTGATGTGGAGACGGGCGGTTGAGATCGGAACTTGTTGGTGATAGATCTGCCTGTATGCTTCGTGTTGCATTGAATGGTGCTTAGATCTGTGGGATTGGTGATGGGATAGTCGGATTTGTCCATGTATTTGATACTTTCCCGGGTTGATTGCCATGGATTTGCGGGATATGGCATTA	23	33	Deletion	0.04	-1	PFLC*	PFSVLTAGGWGSGWGFATILCLMWRRAVEIGTCW*	CCTTTC-CTGTGCTGACTGCGGGGGGATGGGGATCTGGGTGGGGGTTCGCTACGATTCTCTGCTTGATGTGGAGACGGGCGGTTGAGATCGGAACTTGTTGGTGATAGATCTGCCTGTATGCTTCGTGTTGCATTGAATGGTGCTTAGATCTGTGGGATTGGTGATGGGATAGTCGGATTTGTCCATGTATTTGATACTTTCCCGGGTTGATTGCCATGGATTTGCGGGATATGGCATTA	CCTTTCTCTGTGCTGACTGCGGGGGGATGGGGATCTGGGTGGGGGTTCGCTACGATTCTCTGCTTGATGTGGAGACGGGCGGTTGAGATCGGAACTTGTTGGTGATAGATCTGCCTGTATGCTTCGTGTTGCATTGAATGGTGCTTAGATCTGTGGGATTGGTGATGGGATAGTCGGATTTGTCCATGTATTTGATACTTTCCCGGGTTGATTGCCATGGATTTGCGGGATATGGCATTA
CCTTTCTCTGTGCTGACTGCGGGGGGATGGGGATCTGGGCGGGGGTTCGCTACGATTCTCTGCTTGATGTGGAGACGGGCGGTTGAGATCGGAACTTGTTGGTGATAGATCTGCCTGTATGCTTCGTGTTGCATTGAATGGTGCTTAGATCTGTGGGATTGGTGATGGGATAGTCGGATTTGTCCATGTATTTGATACTTTCCCGGGTTGATTGCCATGGATTTGCGGGATATGGCATTA	23	31	1 Base Change	0.04	0	PFSVLTAGGWGSGRGFATILCLMWRRAVEIGTCW*	PFSVLTAGGWGSGWGFATILCLMWRRAVEIGTCW*	CCTTTCTCTGTGCTGACTGCGGGGGGATGGGGATCTGGGCGGGGGTTCGCTACGATTCTCTGCTTGATGTGGAGACGGGCGGTTGAGATCGGAACTTGTTGGTGATAGATCTGCCTGTATGCTTCGTGTTGCATTGAATGGTGCTTAGATCTGTGGGATTGGTGATGGGATAGTCGGATTTGTCCATGTATTTGATACTTTCCCGGGTTGATTGCCATGGATTTGCGGGATATGGCATTA	CCTTTCTCTGTGCTGACTGCGGGGGGATGGGGATCTGGGTGGGGGTTCGCTACGATTCTCTGCTTGATGTGGAGACGGGCGGTTGAGATCGGAACTTGTTGGTGATAGATCTGCCTGTATGCTTCGTGTTGCATTGAATGGTGCTTAGATCTGTGGGATTGGTGATGGGATAGTCGGATTTGTCCATGTATTTGATACTTTCCCGGGTTGATTGCCATGGATTTGCGGGATATGGCATTA
CCTTTCTCTGTGCTGACTGCGGGGGGATGGGGATCTGGGTGGGGGTTCGCTACGATCCTCTGCTTGATGTGGAGACGGGCGGTTGAGATCGGAACTTGTTGGTGATAGATCTGCCTGTATGCTTCGTGTTGCATTGAATGGTGCTTAGATCTGTGGGATTGGTGATGGGATAGTCGGATTTGTCCATGTATTTGATACTTTCCCGGGTTGATTGCCATGGATTTGCGGGATATGGCATTA	23	32	1 Base Change	0.04	0	PFSVLTAGGWGSGWGFATILCLMWRRAVEIGTCW*	PFSVLTAGGWGSGWGFATILCLMWRRAVEIGTCW*	CCTTTCTCTGTGCTGACTGCGGGGGGATGGGGATCTGGGTGGGGGTTCGCTACGATCCTCTGCTTGATGTGGAGACGGGCGGTTGAGATCGGAACTTGTTGGTGATAGATCTGCCTGTATGCTTCGTGTTGCATTGAATGGTGCTTAGATCTGTGGGATTGGTGATGGGATAGTCGGATTTGTCCATGTATTTGATACTTTCCCGGGTTGATTGCCATGGATTTGCGGGATATGGCATTA	CCTTTCTCTGTGCTGACTGCGGGGGGATGGGGATCTGGGTGGGGGTTCGCTACGATTCTCTGCTTGATGTGGAGACGGGCGGTTGAGATCGGAACTTGTTGGTGATAGATCTGCCTGTATGCTTCGTGTTGCATTGAATGGTGCTTAGATCTGTGGGATTGGTGATGGGATAGTCGGATTTGTCCATGTATTTGATACTTTCCCGGGTTGATTGCCATGGATTTGCGGGATATGGCATTA
CCTTTCTCTGTGCTGACTGCGGGGGGATGGGGATCTGGGTGGGGGTTCGCTACGATTCTCTGCTTGATGTGGAGACGGGCGGTTGAGATCGGAACTTGTTGGCGATAGATCTGCCTGTATGCTTCGTGTTGCATTGAATGGTGCTTAGATCTGTGGGATTGGTGATGGGATAGTCGGATTTGTCCATGTATTTGATACTTTCCCGGGTTGATTGCCATGGATTTGCGGGATATGGCATTA	23	33	1 Base Change	0.04	0	PFSVLTAGGWGSGWGFATILCLMWRRAVEIGTCWR*	PFSVLTAGGWGSGWGFATILCLMWRRAVEIGTCW*	CCTTTCTCTGTGCTGACTGCGGGGGGATGGGGATCTGGGTGGGGGTTCGCTACGATTCTCTGCTTGATGTGGAGACGGGCGGTTGAGATCGGAACTTGTTGGCGATAGATCTGCCTGTATGCTTCGTGTTGCATTGAATGGTGCTTAGATCTGTGGGATTGGTGATGGGATAGTCGGATTTGTCCATGTATTTGATACTTTCCCGGGTTGATTGCCATGGATTTGCGGGATATGGCATTA	CCTTTCTCTGTGCTGACTGCGGGGGGATGGGGATCTGGGTGGGGGTTCGCTACGATTCTCTGCTTGATGTGGAGACGGGCGGTTGAGATCGGAACTTGTTGGTGATAGATCTGCCTGTATGCTTCGTGTTGCATTGAATGGTGCTTAGATCTGTGGGATTGGTGATGGGATAGTCGGATTTGTCCATGTATTTGATACTTTCCCGGGTTGATTGCCATGGATTTGCGGGATATGGCATTA
CCTTTCTCTGTGCTGACTGCGGGGGGATGGGGATCTGGGTGGGGGTTCGCTACGATTCTCTGCTTGATGTGGAGACGGGCGGTTGGGATCGGAACTTGTTGGTGATAGATCTGCCTGTATGCTTCGTGTTGCATTGAATGGTGCTTAGATCTGTGGGATTGGTGATGGGATAGTCGGATTTGTCCATGTATTTGATACTTTCCCGGGTTGATTGCCATGGATTTGCGGGATATGGCATTA	23	33	1 Base Change	0.04	0	PFSVLTAGGWGSGWGFATILCLMWRRAVGIGTCW*	PFSVLTAGGWGSGWGFATILCLMWRRAVEIGTCW*	CCTTTCTCTGTGCTGACTGCGGGGGGATGGGGATCTGGGTGGGGGTTCGCTACGATTCTCTGCTTGATGTGGAGACGGGCGGTTGGGATCGGAACTTGTTGGTGATAGATCTGCCTGTATGCTTCGTGTTGCATTGAATGGTGCTTAGATCTGTGGGATTGGTGATGGGATAGTCGGATTTGTCCATGTATTTGATACTTTCCCGGGTTGATTGCCATGGATTTGCGGGATATGGCATTA	CCTTTCTCTGTGCTGACTGCGGGGGGATGGGGATCTGGGTGGGGGTTCGCTACGATTCTCTGCTTGATGTGGAGACGGGCGGTTGAGATCGGAACTTGTTGGTGATAGATCTGCCTGTATGCTTCGTGTTGCATTGAATGGTGCTTAGATCTGTGGGATTGGTGATGGGATAGTCGGATTTGTCCATGTATTTGATACTTTCCCGGGTTGATTGCCATGGATTTGCGGGATATGGCATTA
CCTTTCTCTGTGCTGACTGCGGGGGGATGGGGATCTGGGTGGGGGTTCGCTACGATTCTCTGCTTGATGTGGAGACTgGGCGGTTGAGATCGGAACTTGTTGGTGATAGATCTGCCTGTATGCTTCGTGTTGCATTGAATGGTGCTTAGATCTGTGGGATTGGTGATGGGATAGTCGGATTTGCCCATGTATTTGATACTTTCCCGGGTTGATTGCCATGGATTTGCGGGATATGGCATTA	23	33	Insertion	0.04	1	PFSVLTAGGWGSGWGFATILCLMWRLGG*	PFSVLTAGGWGSGWGFATILCLMWRRAVEIGTCW*	CCTTTCTCTGTGCTGACTGCGGGGGGATGGGGATCTGGGTGGGGGTTCGCTACGATTCTCTGCTTGATGTGGAGACTGGGCGGTTGAGATCGGAACTTGTTGGTGATAGATCTGCCTGTATGCTTCGTGTTGCATTGAATGGTGCTTAGATCTGTGGGATTGGTGATGGGATAGTCGGATTTGCCCATGTATTTGATACTTTCCCGGGTTGATTGCCATGGATTTGCGGGATATGGCATTA	CCTTTCTCTGTGCTGACTGCGGGGGGATGGGGATCTGGGTGGGGGTTCGCTACGATTCTCTGCTTGATGTGGAGACGGGCGGTTGAGATCGGAACTTGTTGGTGATAGATCTGCCTGTATGCTTCGTGTTGCATTGAATGGTGCTTAGATCTGTGGGATTGGTGATGGGATAGTCGGATTTGTCCATGTATTTGATACTTTCCCGGGTTGATTGCCATGGATTTGCGGGATATGGCATTA
CCTTTCTCTGTGCTGACTGCGGGGGGATGGGGATCTGGGTGGGGGCTCGCTACGATTCTCTGCTTGATGTGGAGACTgGGCGGTTGAGATCGGAACTTGTTGGTGATAGATCTGCCTGTATGCTTCGTGTTGCATTGAATGGTGCTTAGATCTGTGGGATTGGTGATGGGATAGTCGGATTTGTCCATGTATTTGATACTTTCCCGGGTTGATTGCCATGGATTTGCGGGATATGGCATTA	22	33	Insertion	0.03	1	PFSVLTAGGWGSGWGLATILCLMWRLGG*	PFSVLTAGGWGSGWGFATILCLMWRRAVEIGTCW*	CCTTTCTCTGTGCTGACTGCGGGGGGATGGGGATCTGGGTGGGGGCTCGCTACGATTCTCTGCTTGATGTGGAGACTGGGCGGTTGAGATCGGAACTTGTTGGTGATAGATCTGCCTGTATGCTTCGTGTTGCATTGAATGGTGCTTAGATCTGTGGGATTGGTGATGGGATAGTCGGATTTGTCCATGTATTTGATACTTTCCCGGGTTGATTGCCATGGATTTGCGGGATATGGCATTA	CCTTTCTCTGTGCTGACTGCGGGGGGATGGGGATCTGGGTGGGGGTTCGCTACGATTCTCTGCTTGATGTGGAGACGGGCGGTTGAGATCGGAACTTGTTGGTGATAGATCTGCCTGTATGCTTCGTGTTGCATTGAATGGTGCTTAGATCTGTGGGATTGGTGATGGGATAGTCGGATTTGTCCATGTATTTGATACTTTCCCGGGTTGATTGCCATGGATTTGCGGGATATGGCATTA
CCTTTCTCTGTGCTGACTGCGGGGGGATGGGGATCTGGGTGGGGGTTCGCTACGATTCTCT---------------GGGCGGTTGAGATCGGAACTTGTTGGTGATAGATCTGCCTGTATGCTTCGTGTTGCATTGAATGGTGCTTAGATCTGTGGGATTGGTGATGGGATAGTCGGATTTGTCCATGTATTTGATACTTTCCCGGGTTGATTGCCATGGATTTGCGGGATATGGCATTA	22	32	Deletion	0.03	-15	PFSVLTAGGWGSGWGFATILWAVEIGTCW*	PFSVLTAGGWGSGWGFATILCLMWRRAVEIGTCW*	CCTTTCTCTGTGCTGACTGCGGGGGGATGGGGATCTGGGTGGGGGTTCGCTACGATTCTCT---------------GGGCGGTTGAGATCGGAACTTGTTGGTGATAGATCTGCCTGTATGCTTCGTGTTGCATTGAATGGTGCTTAGATCTGTGGGATTGGTGATGGGATAGTCGGATTTGTCCATGTATTTGATACTTTCCCGGGTTGATTGCCATGGATTTGCGGGATATGGCATTA	CCTTTCTCTGTGCTGACTGCGGGGGGATGGGGATCTGGGTGGGGGTTCGCTACGATTCTCTGCTTGATGTGGAGACGGGCGGTTGAGATCGGAACTTGTTGGTGATAGATCTGCCTGTATGCTTCGTGTTGCATTGAATGGTGCTTAGATCTGTGGGATTGGTGATGGGATAGTCGGATTTGTCCATGTATTTGATACTTTCCCGGGTTGATTGCCATGGATTTGCGGGATATGGCATTA
CCTTTCTCTGTGCTGACTGCGGGGGGATGGGGATCTGGGTGGGGGTTCGCTACGATTCTCTGCTTGATGTGGAGACcGGGCGGTTGAGATCGGAACTTGTTGGTGATAGATCTGCCTGTATGCTTCGTGTTGCATTGAATGGTGCTTAGATCTGTGGGATTGGTGATGGGATAGTCGGATTTGTCCATGTATTTGATACTTTCCCGGGTTGATTGCCATGGATTTGCGGGATA-GGCATTA	22	33	Insertion and Deletion	0.03	0	PFSVLTAGGWGSGWGFATILCLMWRPGG*	PFSVLTAGGWGSGWGFATILCLMWRRAVEIGTCW*	CCTTTCTCTGTGCTGACTGCGGGGGGATGGGGATCTGGGTGGGGGTTCGCTACGATTCTCTGCTTGATGTGGAGACCGGGCGGTTGAGATCGGAACTTGTTGGTGATAGATCTGCCTGTATGCTTCGTGTTGCATTGAATGGTGCTTAGATCTGTGGGATTGGTGATGGGATAGTCGGATTTGTCCATGTATTTGATACTTTCCCGGGTTGATTGCCATGGATTTGCGGGATA-GGCATTA	CCTTTCTCTGTGCTGACTGCGGGGGGATGGGGATCTGGGTGGGGGTTCGCTACGATTCTCTGCTTGATGTGGAGACGGGCGGTTGAGATCGGAACTTGTTGGTGATAGATCTGCCTGTATGCTTCGTGTTGCATTGAATGGTGCTTAGATCTGTGGGATTGGTGATGGGATAGTCGGATTTGTCCATGTATTTGATACTTTCCCGGGTTGATTGCCATGGATTTGCGGGATATGGCATTA
CCTTTCTCTGTGCTGACTGCGGGGGGATGGGGATCTGGGTGGGGGTTCGCTACGATTCTCTGCTTGATGTGGAGACGGGCGGTTGAGATCGGAACTTGTTGGTGATAGATCTGCCTGTATGCTTCGTGTCGCATTGAATGGTGCTTAGATCTGTGGGATTGGTGATGGGATAGTCGGATTTGTCCATGTATTTGATACTTTCCCGGGTTGATTGCCATGGATTTGCGGGATATGGCATTA	22	33	1 Base Change	0.03	0	PFSVLTAGGWGSGWGFATILCLMWRRAVEIGTCW*	PFSVLTAGGWGSGWGFATILCLMWRRAVEIGTCW*	CCTTTCTCTGTGCTGACTGCGGGGGGATGGGGATCTGGGTGGGGGTTCGCTACGATTCTCTGCTTGATGTGGAGACGGGCGGTTGAGATCGGAACTTGTTGGTGATAGATCTGCCTGTATGCTTCGTGTCGCATTGAATGGTGCTTAGATCTGTGGGATTGGTGATGGGATAGTCGGATTTGTCCATGTATTTGATACTTTCCCGGGTTGATTGCCATGGATTTGCGGGATATGGCATTA	CCTTTCTCTGTGCTGACTGCGGGGGGATGGGGATCTGGGTGGGGGTTCGCTACGATTCTCTGCTTGATGTGGAGACGGGCGGTTGAGATCGGAACTTGTTGGTGATAGATCTGCCTGTATGCTTCGTGTTGCATTGAATGGTGCTTAGATCTGTGGGATTGGTGATGGGATAGTCGGATTTGTCCATGTATTTGATACTTTCCCGGGTTGATTGCCATGGATTTGCGGGATATGGCATTA
CCTTTCTCTGTGCTGACTGCGGGGGGATGGGGATCTGGGTGGGGGTTCGCTACGATTCTCTGCTTGATGTGGAGACGGGCGGTTGAGATCGGAACTTGTTGGTGATAGATCTGCCTGTATGCTTCGTGTTGCATTGAATGGTGCTTAGATCTGTGGGATTGGCGATGGGATAGTCGGATTTGTCCATGTATTTGATACTTTCCCGGGTTGATTGCCATGGATTTGCGGGATATGGCATTA	22	33	1 Base Change	0.03	0	PFSVLTAGGWGSGWGFATILCLMWRRAVEIGTCW*	PFSVLTAGGWGSGWGFATILCLMWRRAVEIGTCW*	CCTTTCTCTGTGCTGACTGCGGGGGGATGGGGATCTGGGTGGGGGTTCGCTACGATTCTCTGCTTGATGTGGAGACGGGCGGTTGAGATCGGAACTTGTTGGTGATAGATCTGCCTGTATGCTTCGTGTTGCATTGAATGGTGCTTAGATCTGTGGGATTGGCGATGGGATAGTCGGATTTGTCCATGTATTTGATACTTTCCCGGGTTGATTGCCATGGATTTGCGGGATATGGCATTA	CCTTTCTCTGTGCTGACTGCGGGGGGATGGGGATCTGGGTGGGGGTTCGCTACGATTCTCTGCTTGATGTGGAGACGGGCGGTTGAGATCGGAACTTGTTGGTGATAGATCTGCCTGTATGCTTCGTGTTGCATTGAATGGTGCTTAGATCTGTGGGATTGGTGATGGGATAGTCGGATTTGTCCATGTATTTGATACTTTCCCGGGTTGATTGCCATGGATTTGCGGGATATGGCATTA
CCTTTCTCTGTGCTGACTGCGGGGGGATGGGGATCTGGGTGGGGGTTCGCTACGATTCTCTGCTTGATGTGGAGACTgGGCGGTTGAGATCGGAACTTGTTGGTGATAGATCTGCCTGTATGCTTCGTGTTGCATTGAATGGTGCTTAGATCTGTGGGATTGGTGGTGGGATAGTCGGATTTGTCCATGTATTTGATACTTTCCCGGGTTGATTGCCATGGATTTGCGGGATATGGCATTA	22	32	Insertion	0.03	1	PFSVLTAGGWGSGWGFATILCLMWRLGG*	PFSVLTAGGWGSGWGFATILCLMWRRAVEIGTCW*	CCTTTCTCTGTGCTGACTGCGGGGGGATGGGGATCTGGGTGGGGGTTCGCTACGATTCTCTGCTTGATGTGGAGACTGGGCGGTTGAGATCGGAACTTGTTGGTGATAGATCTGCCTGTATGCTTCGTGTTGCATTGAATGGTGCTTAGATCTGTGGGATTGGTGGTGGGATAGTCGGATTTGTCCATGTATTTGATACTTTCCCGGGTTGATTGCCATGGATTTGCGGGATATGGCATTA	CCTTTCTCTGTGCTGACTGCGGGGGGATGGGGATCTGGGTGGGGGTTCGCTACGATTCTCTGCTTGATGTGGAGACGGGCGGTTGAGATCGGAACTTGTTGGTGATAGATCTGCCTGTATGCTTCGTGTTGCATTGAATGGTGCTTAGATCTGTGGGATTGGTGATGGGATAGTCGGATTTGTCCATGTATTTGATACTTTCCCGGGTTGATTGCCATGGATTTGCGGGATATGGCATTA
CCTTTCTCTGTGCTGACTGCGGGGGGATGGGGATCTGGGTGGGGGTTCGCTACGATTCTCTGCTTGATGTGGAGACTgGGCGGTTGGGATCGGAACTTGTTGGTGATAGATCTGCCTGTATGCTTCGTGTTGCATTGAATGGTGCTTAGATCTGTGGGATTGGTGATGGGATAGTCGGATTTGTCCATGTATTTGATACTTTCCCGGGTTGATTGCCATGGATTTGCGGGATATGGCATTA	22	33	Insertion	0.03	1	PFSVLTAGGWGSGWGFATILCLMWRLGGWDRNLLVIDLPVCFVLH*	PFSVLTAGGWGSGWGFATILCLMWRRAVEIGTCW*	CCTTTCTCTGTGCTGACTGCGGGGGGATGGGGATCTGGGTGGGGGTTCGCTACGATTCTCTGCTTGATGTGGAGACTGGGCGGTTGGGATCGGAACTTGTTGGTGATAGATCTGCCTGTATGCTTCGTGTTGCATTGAATGGTGCTTAGATCTGTGGGATTGGTGATGGGATAGTCGGATTTGTCCATGTATTTGATACTTTCCCGGGTTGATTGCCATGGATTTGCGGGATATGGCATTA	CCTTTCTCTGTGCTGACTGCGGGGGGATGGGGATCTGGGTGGGGGTTCGCTACGATTCTCTGCTTGATGTGGAGACGGGCGGTTGAGATCGGAACTTGTTGGTGATAGATCTGCCTGTATGCTTCGTGTTGCATTGAATGGTGCTTAGATCTGTGGGATTGGTGATGGGATAGTCGGATTTGTCCATGTATTTGATACTTTCCCGGGTTGATTGCCATGGATTTGCGGGATATGGCATTA
CCTTTCTCTGTGCTGACTGCGGGGGGATGGGGATCTGGGTGGGGGTTCGCTACGATTCTCTGCTTGATGTGGAGGCTgGGCGGTTGAGATCGGAACTTGTTGGTGATAGATCTGCCTGTATGCTTCGTGTTGCATTGAATGGTGCTTAGATCTGTGGGATTGGTGATGGGATAGTCGGATTTGTCCATGTATTTGATACTTTCCCGGGTTGATTGCCATGGATTTGCGGGATATGGCATTA	22	33	Insertion	0.03	1	PFSVLTAGGWGSGWGFATILCLMWRLGG*	PFSVLTAGGWGSGWGFATILCLMWRRAVEIGTCW*	CCTTTCTCTGTGCTGACTGCGGGGGGATGGGGATCTGGGTGGGGGTTCGCTACGATTCTCTGCTTGATGTGGAGGCTGGGCGGTTGAGATCGGAACTTGTTGGTGATAGATCTGCCTGTATGCTTCGTGTTGCATTGAATGGTGCTTAGATCTGTGGGATTGGTGATGGGATAGTCGGATTTGTCCATGTATTTGATACTTTCCCGGGTTGATTGCCATGGATTTGCGGGATATGGCATTA	CCTTTCTCTGTGCTGACTGCGGGGGGATGGGGATCTGGGTGGGGGTTCGCTACGATTCTCTGCTTGATGTGGAGACGGGCGGTTGAGATCGGAACTTGTTGGTGATAGATCTGCCTGTATGCTTCGTGTTGCATTGAATGGTGCTTAGATCTGTGGGATTGGTGATGGGATAGTCGGATTTGTCCATGTATTTGATACTTTCCCGGGTTGATTGCCATGGATTTGCGGGATATGGCATTA
CCTTTCTCTGTGCTGACTGCGGGGGGATGGGGATCTGGGTGGGGGTTCGCTACGATTCTCTGCTTGATGTGGAGACGGGCGGTTGAGATCGGAACTTGTCGGTGATAGATCTGCCTGTATGCTTCGTGTTGCATTGAATGGTGCTTAGATCTGTGGGATTGGTGATGGGATAGTCGGATTTGTCCATGTATTTGATACTTTCCCGGGTTGATTGCCATGGATTTGCGGGATATGGCATTA	21	33	1 Base Change	0.03	0	PFSVLTAGGWGSGWGFATILCLMWRRAVEIGTCR*	PFSVLTAGGWGSGWGFATILCLMWRRAVEIGTCW*	CCTTTCTCTGTGCTGACTGCGGGGGGATGGGGATCTGGGTGGGGGTTCGCTACGATTCTCTGCTTGATGTGGAGACGGGCGGTTGAGATCGGAACTTGTCGGTGATAGATCTGCCTGTATGCTTCGTGTTGCATTGAATGGTGCTTAGATCTGTGGGATTGGTGATGGGATAGTCGGATTTGTCCATGTATTTGATACTTTCCCGGGTTGATTGCCATGGATTTGCGGGATATGGCATTA	CCTTTCTCTGTGCTGACTGCGGGGGGATGGGGATCTGGGTGGGGGTTCGCTACGATTCTCTGCTTGATGTGGAGACGGGCGGTTGAGATCGGAACTTGTTGGTGATAGATCTGCCTGTATGCTTCGTGTTGCATTGAATGGTGCTTAGATCTGTGGGATTGGTGATGGGATAGTCGGATTTGTCCATGTATTTGATACTTTCCCGGGTTGATTGCCATGGATTTGCGGGATATGGCATTA
CCTTTCTCTGTGCTGACTGCGGGGGGATGGGGATCTGGGTGGGGGTTCGCTACGATTCTCTGCTTGATGTGGAGACGGGCGGTTGAGATCGGAACTTGTTGGTGATAGATCTGCCTGTATGCTTCGTGTTGCATTGAATGGTGCTTAGATCTGTGGGATTGGTGGTGGGATAGTCGGATTTGTCCATGTATTTGATACTTTCCCGGGTTGATTGCCATGGATTTGCGGGATATGGCATTA	21	33	1 Base Change	0.03	0	PFSVLTAGGWGSGWGFATILCLMWRRAVEIGTCW*	PFSVLTAGGWGSGWGFATILCLMWRRAVEIGTCW*	CCTTTCTCTGTGCTGACTGCGGGGGGATGGGGATCTGGGTGGGGGTTCGCTACGATTCTCTGCTTGATGTGGAGACGGGCGGTTGAGATCGGAACTTGTTGGTGATAGATCTGCCTGTATGCTTCGTGTTGCATTGAATGGTGCTTAGATCTGTGGGATTGGTGGTGGGATAGTCGGATTTGTCCATGTATTTGATACTTTCCCGGGTTGATTGCCATGGATTTGCGGGATATGGCATTA	CCTTTCTCTGTGCTGACTGCGGGGGGATGGGGATCTGGGTGGGGGTTCGCTACGATTCTCTGCTTGATGTGGAGACGGGCGGTTGAGATCGGAACTTGTTGGTGATAGATCTGCCTGTATGCTTCGTGTTGCATTGAATGGTGCTTAGATCTGTGGGATTGGTGATGGGATAGTCGGATTTGTCCATGTATTTGATACTTTCCCGGGTTGATTGCCATGGATTTGCGGGATATGGCATTA
CCTTTCTCTGTGCTGACTGCGGGGGGACGGGGATCTGGGTGGGGGTTCGCTACGATTCTCTGCTTGATGTGGAGACGGGCGGTTGAGATCGGAACTTGTTGGTGATAGATCTGCCTGTATGCTTCGTGTTGCATTGAATGGTGCTTAGATCTGTGGGATTGGTGATGGGATAGTCGGATTTGTCCATGTATTTGATACTTTCCCGGGTTGATTGCCATGGATTTGCGGGATATGGCATTA	20	33	1 Base Change	0.03	0	PFSVLTAGGRGSGWGFATILCLMWRRAVEIGTCW*	PFSVLTAGGWGSGWGFATILCLMWRRAVEIGTCW*	CCTTTCTCTGTGCTGACTGCGGGGGGACGGGGATCTGGGTGGGGGTTCGCTACGATTCTCTGCTTGATGTGGAGACGGGCGGTTGAGATCGGAACTTGTTGGTGATAGATCTGCCTGTATGCTTCGTGTTGCATTGAATGGTGCTTAGATCTGTGGGATTGGTGATGGGATAGTCGGATTTGTCCATGTATTTGATACTTTCCCGGGTTGATTGCCATGGATTTGCGGGATATGGCATTA	CCTTTCTCTGTGCTGACTGCGGGGGGATGGGGATCTGGGTGGGGGTTCGCTACGATTCTCTGCTTGATGTGGAGACGGGCGGTTGAGATCGGAACTTGTTGGTGATAGATCTGCCTGTATGCTTCGTGTTGCATTGAATGGTGCTTAGATCTGTGGGATTGGTGATGGGATAGTCGGATTTGTCCATGTATTTGATACTTTCCCGGGTTGATTGCCATGGATTTGCGGGATATGGCATTA
CCTTTCTCTGTGCTGACTGCGGGGGGATGGGGACCTGGGTGGGGGTTCGCTACGATTCTCTGCTTGATGTGGAGACGGGCGGTTGAGATCGGAACTTGTTGGTGATAGATCTGCCTGTATGCTTCGTGTTGCATTGAATGGTGCTTAGATCTGTGGGATTGGTGATGGGATAGTCGGATTTGTCCATGTATTTGATACTTTCCCGGGTTGATTGCCATGGATTTGCGGGATATGGCATTA	20	33	1 Base Change	0.03	0	PFSVLTAGGWGPGWGFATILCLMWRRAVEIGTCW*	PFSVLTAGGWGSGWGFATILCLMWRRAVEIGTCW*	CCTTTCTCTGTGCTGACTGCGGGGGGATGGGGACCTGGGTGGGGGTTCGCTACGATTCTCTGCTTGATGTGGAGACGGGCGGTTGAGATCGGAACTTGTTGGTGATAGATCTGCCTGTATGCTTCGTGTTGCATTGAATGGTGCTTAGATCTGTGGGATTGGTGATGGGATAGTCGGATTTGTCCATGTATTTGATACTTTCCCGGGTTGATTGCCATGGATTTGCGGGATATGGCATTA	CCTTTCTCTGTGCTGACTGCGGGGGGATGGGGATCTGGGTGGGGGTTCGCTACGATTCTCTGCTTGATGTGGAGACGGGCGGTTGAGATCGGAACTTGTTGGTGATAGATCTGCCTGTATGCTTCGTGTTGCATTGAATGGTGCTTAGATCTGTGGGATTGGTGATGGGATAGTCGGATTTGTCCATGTATTTGATACTTTCCCGGGTTGATTGCCATGGATTTGCGGGATATGGCATTA
CCTTTCTCTGTGCTGACTGCGGGGGGATGGGGATCCGGGTGGGGGTTCGCTACGATTCTCTGCTTGATGTGGAGACGGGCGGTTGAGATCGGAACTTGTTGGTGATAGATCTGCCTGTATGCTTCGTGTTGCATTGAATGGTGCTTAGATCTGTGGGATTGGTGATGGGATAGTCGGATTTGTCCATGTATTTGATACTTTCCCGGGTTGATTGCCATGGATTTGCGGGATATGGCATTA	20	33	1 Base Change	0.03	0	PFSVLTAGGWGSGWGFATILCLMWRRAVEIGTCW*	PFSVLTAGGWGSGWGFATILCLMWRRAVEIGTCW*	CCTTTCTCTGTGCTGACTGCGGGGGGATGGGGATCCGGGTGGGGGTTCGCTACGATTCTCTGCTTGATGTGGAGACGGGCGGTTGAGATCGGAACTTGTTGGTGATAGATCTGCCTGTATGCTTCGTGTTGCATTGAATGGTGCTTAGATCTGTGGGATTGGTGATGGGATAGTCGGATTTGTCCATGTATTTGATACTTTCCCGGGTTGATTGCCATGGATTTGCGGGATATGGCATTA	CCTTTCTCTGTGCTGACTGCGGGGGGATGGGGATCTGGGTGGGGGTTCGCTACGATTCTCTGCTTGATGTGGAGACGGGCGGTTGAGATCGGAACTTGTTGGTGATAGATCTGCCTGTATGCTTCGTGTTGCATTGAATGGTGCTTAGATCTGTGGGATTGGTGATGGGATAGTCGGATTTGTCCATGTATTTGATACTTTCCCGGGTTGATTGCCATGGATTTGCGGGATATGGCATTA
CCTTTCTCTGTGCTGACTGCGGGGGGATGGGGATCTGGGTGGGGGTTCGCTACGATTCTCTGCTTGATGTGGAGACGGGCGGTTGAGATCGGAACTTGTTGGTGATAGATCTGCCCGTATGCTTCGTGTTGCATTGAATGGTGCTTAGATCTGTGGGATTGGTGATGGGATAGTCGGATTTGTCCATGTATTTGATACTTTCCCGGGTTGATTGCCATGGATTTGCGGGATATGGCATTA	20	34	1 Base Change	0.03	0	PFSVLTAGGWGSGWGFATILCLMWRRAVEIGTCW*	PFSVLTAGGWGSGWGFATILCLMWRRAVEIGTCW*	CCTTTCTCTGTGCTGACTGCGGGGGGATGGGGATCTGGGTGGGGGTTCGCTACGATTCTCTGCTTGATGTGGAGACGGGCGGTTGAGATCGGAACTTGTTGGTGATAGATCTGCCCGTATGCTTCGTGTTGCATTGAATGGTGCTTAGATCTGTGGGATTGGTGATGGGATAGTCGGATTTGTCCATGTATTTGATACTTTCCCGGGTTGATTGCCATGGATTTGCGGGATATGGCATTA	CCTTTCTCTGTGCTGACTGCGGGGGGATGGGGATCTGGGTGGGGGTTCGCTACGATTCTCTGCTTGATGTGGAGACGGGCGGTTGAGATCGGAACTTGTTGGTGATAGATCTGCCTGTATGCTTCGTGTTGCATTGAATGGTGCTTAGATCTGTGGGATTGGTGATGGGATAGTCGGATTTGTCCATGTATTTGATACTTTCCCGGGTTGATTGCCATGGATTTGCGGGATATGGCATTA
CCTTTCTCTGTGCTGACTGCGGGGGGATGGGGATCTGGGTGGGGGTTCGCTACGATTCTCTGCTTGATGTGGAGACGGGCGGTTGAGATCGGAACTTGTTGGTGATAGATCTGCCTGTATGCTTCGCGTTGCATTGAATGGTGCTTAGATCTGTGGGATTGGTGATGGGATAGTCGGATTTGTCCATGTATTTGATACTTTCCCGGGTTGATTGCCATGGATTTGCGGGATATGGCATTA	20	32	1 Base Change	0.03	0	PFSVLTAGGWGSGWGFATILCLMWRRAVEIGTCW*	PFSVLTAGGWGSGWGFATILCLMWRRAVEIGTCW*	CCTTTCTCTGTGCTGACTGCGGGGGGATGGGGATCTGGGTGGGGGTTCGCTACGATTCTCTGCTTGATGTGGAGACGGGCGGTTGAGATCGGAACTTGTTGGTGATAGATCTGCCTGTATGCTTCGCGTTGCATTGAATGGTGCTTAGATCTGTGGGATTGGTGATGGGATAGTCGGATTTGTCCATGTATTTGATACTTTCCCGGGTTGATTGCCATGGATTTGCGGGATATGGCATTA	CCTTTCTCTGTGCTGACTGCGGGGGGATGGGGATCTGGGTGGGGGTTCGCTACGATTCTCTGCTTGATGTGGAGACGGGCGGTTGAGATCGGAACTTGTTGGTGATAGATCTGCCTGTATGCTTCGTGTTGCATTGAATGGTGCTTAGATCTGTGGGATTGGTGATGGGATAGTCGGATTTGTCCATGTATTTGATACTTTCCCGGGTTGATTGCCATGGATTTGCGGGATATGGCATTA
CCTTTCTCTGTGCTGACTGCGGGGGGATGGGGATCTGGGTGGGGGTTCGCTACGATTCTCTGCTTGATGTGGAGACGGGCGGTTGAGATCGGAACTTGTTGGTGATAGATCTGCCTGTATGCTTCGTGCTGCATTGAATGGTGCTTAGATCTGTGGGATTGGTGATGGGATAGTCGGATTTGTCCATGTATTTGATACTTTCCCGGGTTGATTGCCATGGATTTGCGGGATATGGCATTA	20	33	1 Base Change	0.03	0	PFSVLTAGGWGSGWGFATILCLMWRRAVEIGTCW*	PFSVLTAGGWGSGWGFATILCLMWRRAVEIGTCW*	CCTTTCTCTGTGCTGACTGCGGGGGGATGGGGATCTGGGTGGGGGTTCGCTACGATTCTCTGCTTGATGTGGAGACGGGCGGTTGAGATCGGAACTTGTTGGTGATAGATCTGCCTGTATGCTTCGTGCTGCATTGAATGGTGCTTAGATCTGTGGGATTGGTGATGGGATAGTCGGATTTGTCCATGTATTTGATACTTTCCCGGGTTGATTGCCATGGATTTGCGGGATATGGCATTA	CCTTTCTCTGTGCTGACTGCGGGGGGATGGGGATCTGGGTGGGGGTTCGCTACGATTCTCTGCTTGATGTGGAGACGGGCGGTTGAGATCGGAACTTGTTGGTGATAGATCTGCCTGTATGCTTCGTGTTGCATTGAATGGTGCTTAGATCTGTGGGATTGGTGATGGGATAGTCGGATTTGTCCATGTATTTGATACTTTCCCGGGTTGATTGCCATGGATTTGCGGGATATGGCATTA
CCTTTCTCTGTGCTGACTGCGGGGGGATGGGGATCTGGGTGGGGGTTCGCTACGATTCTCTGCTTGATGTGGAGACGGGCGGTTGAGATCGGAACTTGTTGGTGATAGATCTGCCTGTATGCTTCGTGTTGCATTGAATGGTGCTTAGATCTGTGGGATTGGTGATGGGATAGCCGGATTTGTCCATGTATTTGATACTTTCCCGGGTTGATTGCCATGGATTTGCGGGATATGGCATTA	20	33	1 Base Change	0.03	0	PFSVLTAGGWGSGWGFATILCLMWRRAVEIGTCW*	PFSVLTAGGWGSGWGFATILCLMWRRAVEIGTCW*	CCTTTCTCTGTGCTGACTGCGGGGGGATGGGGATCTGGGTGGGGGTTCGCTACGATTCTCTGCTTGATGTGGAGACGGGCGGTTGAGATCGGAACTTGTTGGTGATAGATCTGCCTGTATGCTTCGTGTTGCATTGAATGGTGCTTAGATCTGTGGGATTGGTGATGGGATAGCCGGATTTGTCCATGTATTTGATACTTTCCCGGGTTGATTGCCATGGATTTGCGGGATATGGCATTA	CCTTTCTCTGTGCTGACTGCGGGGGGATGGGGATCTGGGTGGGGGTTCGCTACGATTCTCTGCTTGATGTGGAGACGGGCGGTTGAGATCGGAACTTGTTGGTGATAGATCTGCCTGTATGCTTCGTGTTGCATTGAATGGTGCTTAGATCTGTGGGATTGGTGATGGGATAGTCGGATTTGTCCATGTATTTGATACTTTCCCGGGTTGATTGCCATGGATTTGCGGGATATGGCATTA
CCTTTCTCTGTGCTGACTGCGGGGGGATGGGGATCTGGGTGGGGGTTCGCTACGATTCTCTGCTTGATGTGGAGACGGGCGGTTGAGATCGGAACTTGTTGGTGATAGATCTGCCTGTATGCTTCGTGTTGCATTGAATGGTGCTTAGGTCTGTGGGATTGGTGATGGGATAGTCGGATTTGTCCATGTATTTGATACTTTCCCGGGTTGATTGCCATGGATTTGCGGGATATGGCATTA	20	33	1 Base Change	0.03	0	PFSVLTAGGWGSGWGFATILCLMWRRAVEIGTCW*	PFSVLTAGGWGSGWGFATILCLMWRRAVEIGTCW*	CCTTTCTCTGTGCTGACTGCGGGGGGATGGGGATCTGGGTGGGGGTTCGCTACGATTCTCTGCTTGATGTGGAGACGGGCGGTTGAGATCGGAACTTGTTGGTGATAGATCTGCCTGTATGCTTCGTGTTGCATTGAATGGTGCTTAGGTCTGTGGGATTGGTGATGGGATAGTCGGATTTGTCCATGTATTTGATACTTTCCCGGGTTGATTGCCATGGATTTGCGGGATATGGCATTA	CCTTTCTCTGTGCTGACTGCGGGGGGATGGGGATCTGGGTGGGGGTTCGCTACGATTCTCTGCTTGATGTGGAGACGGGCGGTTGAGATCGGAACTTGTTGGTGATAGATCTGCCTGTATGCTTCGTGTTGCATTGAATGGTGCTTAGATCTGTGGGATTGGTGATGGGATAGTCGGATTTGTCCATGTATTTGATACTTTCCCGGGTTGATTGCCATGGATTTGCGGGATATGGCATTA
CCTTTCTCTGTGCTGACTGCGGGGGGATGGGGATCTGGGTGGGGGTTCGCTACGATTCTCTGCTTGATGTGGAGACTgGGCGGTTGAGATCGGAACTTGTTGGTGATAGGTCTGCCTGTATGCTTCGTGTTGCATTGAATGGTGCTTAGATCTGTGGGATTGGTGATGGGATAGTCGGATTTGTCCATGTATTTGATACTTTCCCGGGTTGATTGCCATGGATTTGCGGGATATGGCATTA	20	33	Insertion	0.03	1	PFSVLTAGGWGSGWGFATILCLMWRLGG*	PFSVLTAGGWGSGWGFATILCLMWRRAVEIGTCW*	CCTTTCTCTGTGCTGACTGCGGGGGGATGGGGATCTGGGTGGGGGTTCGCTACGATTCTCTGCTTGATGTGGAGACTGGGCGGTTGAGATCGGAACTTGTTGGTGATAGGTCTGCCTGTATGCTTCGTGTTGCATTGAATGGTGCTTAGATCTGTGGGATTGGTGATGGGATAGTCGGATTTGTCCATGTATTTGATACTTTCCCGGGTTGATTGCCATGGATTTGCGGGATATGGCATTA	CCTTTCTCTGTGCTGACTGCGGGGGGATGGGGATCTGGGTGGGGGTTCGCTACGATTCTCTGCTTGATGTGGAGACGGGCGGTTGAGATCGGAACTTGTTGGTGATAGATCTGCCTGTATGCTTCGTGTTGCATTGAATGGTGCTTAGATCTGTGGGATTGGTGATGGGATAGTCGGATTTGTCCATGTATTTGATACTTTCCCGGGTTGATTGCCATGGATTTGCGGGATATGGCATTA
CCTTTCTCTGTGCTGACTGCGGGGGGATGGGGATCTGGGTGGGGGTTCGCTACGATTCTCTGCTTGACGTGGAGACGGGCGGTTGAGATCGGAACTTGTTGGTGATAGATCTGCCTGTATGCTTCGTGTTGCATTGAATGGTGCTTAGATCTGTGGGATTGGTGATGGGATAGTCGGATTTGTCCATGTATTTGATACTTTCCCGGGTTGATTGCCATGGATTTGCGGGATATGGCATTA	19	34	1 Base Change	0.03	0	PFSVLTAGGWGSGWGFATILCLTWRRAVEIGTCW*	PFSVLTAGGWGSGWGFATILCLMWRRAVEIGTCW*	CCTTTCTCTGTGCTGACTGCGGGGGGATGGGGATCTGGGTGGGGGTTCGCTACGATTCTCTGCTTGACGTGGAGACGGGCGGTTGAGATCGGAACTTGTTGGTGATAGATCTGCCTGTATGCTTCGTGTTGCATTGAATGGTGCTTAGATCTGTGGGATTGGTGATGGGATAGTCGGATTTGTCCATGTATTTGATACTTTCCCGGGTTGATTGCCATGGATTTGCGGGATATGGCATTA	CCTTTCTCTGTGCTGACTGCGGGGGGATGGGGATCTGGGTGGGGGTTCGCTACGATTCTCTGCTTGATGTGGAGACGGGCGGTTGAGATCGGAACTTGTTGGTGATAGATCTGCCTGTATGCTTCGTGTTGCATTGAATGGTGCTTAGATCTGTGGGATTGGTGATGGGATAGTCGGATTTGTCCATGTATTTGATACTTTCCCGGGTTGATTGCCATGGATTTGCGGGATATGGCATTA
CCTTTCTCTGTGCTGACTGCGGGGGGATGGGGATCTGGGTGGGGGTTCGCTACGATTCTCTGCTTGACGTGGAGACTgGGCGGTTGAGATCGGAACTTGTTGGTGATAGATCTGCCTGTATGCTTCGTGTTGCATTGAATGGTGCTTAGATCTGTGGGATTGGTGATGGGATAGTCGGATTTGTCCATGTATTTGATACTTTCCCGGGTTGATTGCCATGGATTTGCGGGATATGGCATTA	19	32	Insertion	0.03	1	PFSVLTAGGWGSGWGFATILCLTWRLGG*	PFSVLTAGGWGSGWGFATILCLMWRRAVEIGTCW*	CCTTTCTCTGTGCTGACTGCGGGGGGATGGGGATCTGGGTGGGGGTTCGCTACGATTCTCTGCTTGACGTGGAGACTGGGCGGTTGAGATCGGAACTTGTTGGTGATAGATCTGCCTGTATGCTTCGTGTTGCATTGAATGGTGCTTAGATCTGTGGGATTGGTGATGGGATAGTCGGATTTGTCCATGTATTTGATACTTTCCCGGGTTGATTGCCATGGATTTGCGGGATATGGCATTA	CCTTTCTCTGTGCTGACTGCGGGGGGATGGGGATCTGGGTGGGGGTTCGCTACGATTCTCTGCTTGATGTGGAGACGGGCGGTTGAGATCGGAACTTGTTGGTGATAGATCTGCCTGTATGCTTCGTGTTGCATTGAATGGTGCTTAGATCTGTGGGATTGGTGATGGGATAGTCGGATTTGTCCATGTATTTGATACTTTCCCGGGTTGATTGCCATGGATTTGCGGGATATGGCATTA
CCTTTCTCTGTGCTGACTGCGGGGGGATGGGGATCTGGGTGGGGGTTCGCTACGATTCTCTGCTTGATGTGGAGACcGGGCGGTTGAGATCGGAACTTGTTGGTGATAGATCTGCCTGTATGCCTCGTGTTGCATTGAATGGTGCTTAGATCTGTGGGATTGGTGATGGGATAGTCGGATTTGTCCATGTATTTGATACTTTCCCGGGTTGATTGCCATGGATTTGCGGGATATGGCATTA	19	33	Insertion	0.03	1	PFSVLTAGGWGSGWGFATILCLMWRPGG*	PFSVLTAGGWGSGWGFATILCLMWRRAVEIGTCW*	CCTTTCTCTGTGCTGACTGCGGGGGGATGGGGATCTGGGTGGGGGTTCGCTACGATTCTCTGCTTGATGTGGAGACCGGGCGGTTGAGATCGGAACTTGTTGGTGATAGATCTGCCTGTATGCCTCGTGTTGCATTGAATGGTGCTTAGATCTGTGGGATTGGTGATGGGATAGTCGGATTTGTCCATGTATTTGATACTTTCCCGGGTTGATTGCCATGGATTTGCGGGATATGGCATTA	CCTTTCTCTGTGCTGACTGCGGGGGGATGGGGATCTGGGTGGGGGTTCGCTACGATTCTCTGCTTGATGTGGAGACGGGCGGTTGAGATCGGAACTTGTTGGTGATAGATCTGCCTGTATGCTTCGTGTTGCATTGAATGGTGCTTAGATCTGTGGGATTGGTGATGGGATAGTCGGATTTGTCCATGTATTTGATACTTTCCCGGGTTGATTGCCATGGATTTGCGGGATATGGCATTA
CCTTTCTCTGTGCTGACTGCGGGGGGATGGGGATCTGGGTGGGGGTTCGCTACGATTCTCTGCTTGATGTGGAGACcGGGCGGTTGAGATCGGAACTTGTTGGTGATAGATCTGCCTGTATGCTTCGTGTTGCATTGAATGGTGCTTAGATCTGTGGGATTGGTGATGGGATAGTCGGATTTGCCCATGTATTTGATACTTTCCCGGGTTGATTGCCATGGATTTGCGGGATATGGCATTA	19	32	Insertion	0.03	1	PFSVLTAGGWGSGWGFATILCLMWRPGG*	PFSVLTAGGWGSGWGFATILCLMWRRAVEIGTCW*	CCTTTCTCTGTGCTGACTGCGGGGGGATGGGGATCTGGGTGGGGGTTCGCTACGATTCTCTGCTTGATGTGGAGACCGGGCGGTTGAGATCGGAACTTGTTGGTGATAGATCTGCCTGTATGCTTCGTGTTGCATTGAATGGTGCTTAGATCTGTGGGATTGGTGATGGGATAGTCGGATTTGCCCATGTATTTGATACTTTCCCGGGTTGATTGCCATGGATTTGCGGGATATGGCATTA	CCTTTCTCTGTGCTGACTGCGGGGGGATGGGGATCTGGGTGGGGGTTCGCTACGATTCTCTGCTTGATGTGGAGACGGGCGGTTGAGATCGGAACTTGTTGGTGATAGATCTGCCTGTATGCTTCGTGTTGCATTGAATGGTGCTTAGATCTGTGGGATTGGTGATGGGATAGTCGGATTTGTCCATGTATTTGATACTTTCCCGGGTTGATTGCCATGGATTTGCGGGATATGGCATTA
CCTTTCTCTGTGCTGACTGCGGGGGGATGGGGATCTGGGTGGGGGTTCGCTACGATTCTCTGCTTGATGTGGAGACGGGCGGTTGAGATCGGAACTTGTTGGTGATAGATCTGCCTGTATGCTCCGTGTTGCATTGAATGGTGCTTAGATCTGTGGGATTGGTGATGGGATAGTCGGATTTGTCCATGTATTTGATACTTTCCCGGGTTGATTGCCATGGATTTGCGGGATATGGCATTA	19	33	1 Base Change	0.03	0	PFSVLTAGGWGSGWGFATILCLMWRRAVEIGTCW*	PFSVLTAGGWGSGWGFATILCLMWRRAVEIGTCW*	CCTTTCTCTGTGCTGACTGCGGGGGGATGGGGATCTGGGTGGGGGTTCGCTACGATTCTCTGCTTGATGTGGAGACGGGCGGTTGAGATCGGAACTTGTTGGTGATAGATCTGCCTGTATGCTCCGTGTTGCATTGAATGGTGCTTAGATCTGTGGGATTGGTGATGGGATAGTCGGATTTGTCCATGTATTTGATACTTTCCCGGGTTGATTGCCATGGATTTGCGGGATATGGCATTA	CCTTTCTCTGTGCTGACTGCGGGGGGATGGGGATCTGGGTGGGGGTTCGCTACGATTCTCTGCTTGATGTGGAGACGGGCGGTTGAGATCGGAACTTGTTGGTGATAGATCTGCCTGTATGCTTCGTGTTGCATTGAATGGTGCTTAGATCTGTGGGATTGGTGATGGGATAGTCGGATTTGTCCATGTATTTGATACTTTCCCGGGTTGATTGCCATGGATTTGCGGGATATGGCATTA
CCTTTCTCTGTGCTGACTGCGGGGGGATGGGGATCTGGGTGGGGGTTCGCTACGATTCTCTGCTTGATGTGGAGACGGGCGGTTGAGATCGGAACTTGTTGGTGATAGATCTGCCTGTATGCTTCGTGTTGCATTGAATGGTGCCTAGATCTGTGGGATTGGTGATGGGATAGTCGGATTTGTCCATGTATTTGATACTTTCCCGGGTTGATTGCCATGGATTTGCGGGATATGGCATTA	19	34	1 Base Change	0.03	0	PFSVLTAGGWGSGWGFATILCLMWRRAVEIGTCW*	PFSVLTAGGWGSGWGFATILCLMWRRAVEIGTCW*	CCTTTCTCTGTGCTGACTGCGGGGGGATGGGGATCTGGGTGGGGGTTCGCTACGATTCTCTGCTTGATGTGGAGACGGGCGGTTGAGATCGGAACTTGTTGGTGATAGATCTGCCTGTATGCTTCGTGTTGCATTGAATGGTGCCTAGATCTGTGGGATTGGTGATGGGATAGTCGGATTTGTCCATGTATTTGATACTTTCCCGGGTTGATTGCCATGGATTTGCGGGATATGGCATTA	CCTTTCTCTGTGCTGACTGCGGGGGGATGGGGATCTGGGTGGGGGTTCGCTACGATTCTCTGCTTGATGTGGAGACGGGCGGTTGAGATCGGAACTTGTTGGTGATAGATCTGCCTGTATGCTTCGTGTTGCATTGAATGGTGCTTAGATCTGTGGGATTGGTGATGGGATAGTCGGATTTGTCCATGTATTTGATACTTTCCCGGGTTGATTGCCATGGATTTGCGGGATATGGCATTA
CCTTTCTCTGTGCTGACTGCGGGGGGATGGGGATCTGGGTGGGGGTTCGCTACGATTCTCTGCTTGATGTGGAGACGGGCGGTTGAGATCGGAACTTGTTGGTGATAGATCTGCCTGTATGCTTCGTGTTGCATTGAATGGTGCTTAGATCTGTGGGATTGGTGATGGGATAGTCGGATTTGTCCATGTATTTGATACCTTCCCGGGTTGATTGCCATGGATTTGCGGGATATGGCATTA	19	33	1 Base Change	0.03	0	PFSVLTAGGWGSGWGFATILCLMWRRAVEIGTCW*	PFSVLTAGGWGSGWGFATILCLMWRRAVEIGTCW*	CCTTTCTCTGTGCTGACTGCGGGGGGATGGGGATCTGGGTGGGGGTTCGCTACGATTCTCTGCTTGATGTGGAGACGGGCGGTTGAGATCGGAACTTGTTGGTGATAGATCTGCCTGTATGCTTCGTGTTGCATTGAATGGTGCTTAGATCTGTGGGATTGGTGATGGGATAGTCGGATTTGTCCATGTATTTGATACCTTCCCGGGTTGATTGCCATGGATTTGCGGGATATGGCATTA	CCTTTCTCTGTGCTGACTGCGGGGGGATGGGGATCTGGGTGGGGGTTCGCTACGATTCTCTGCTTGATGTGGAGACGGGCGGTTGAGATCGGAACTTGTTGGTGATAGATCTGCCTGTATGCTTCGTGTTGCATTGAATGGTGCTTAGATCTGTGGGATTGGTGATGGGATAGTCGGATTTGTCCATGTATTTGATACTTTCCCGGGTTGATTGCCATGGATTTGCGGGATATGGCATTA
CCTTTCTCTGTGCTGACTGCGGGGGGATGGGGATCTGGGTGGGGGTTCGCTACGATTCTCTGCTTGATGTGGAGACGGGCGGTTGAGATCGGAACTTGTTGGTGATAGATCTGCCTGTATGCTTCGTGTTGCATTGAATGGTGCTTAGATCTGTGGGATTGGTGATGGGATAGTCGGATTTGTCCATGTATTTGATACTTCCCCGGGTTGATTGCCATGGATTTGCGGGATATGGCATTA	19	33	1 Base Change	0.03	0	PFSVLTAGGWGSGWGFATILCLMWRRAVEIGTCW*	PFSVLTAGGWGSGWGFATILCLMWRRAVEIGTCW*	CCTTTCTCTGTGCTGACTGCGGGGGGATGGGGATCTGGGTGGGGGTTCGCTACGATTCTCTGCTTGATGTGGAGACGGGCGGTTGAGATCGGAACTTGTTGGTGATAGATCTGCCTGTATGCTTCGTGTTGCATTGAATGGTGCTTAGATCTGTGGGATTGGTGATGGGATAGTCGGATTTGTCCATGTATTTGATACTTCCCCGGGTTGATTGCCATGGATTTGCGGGATATGGCATTA	CCTTTCTCTGTGCTGACTGCGGGGGGATGGGGATCTGGGTGGGGGTTCGCTACGATTCTCTGCTTGATGTGGAGACGGGCGGTTGAGATCGGAACTTGTTGGTGATAGATCTGCCTGTATGCTTCGTGTTGCATTGAATGGTGCTTAGATCTGTGGGATTGGTGATGGGATAGTCGGATTTGTCCATGTATTTGATACTTTCCCGGGTTGATTGCCATGGATTTGCGGGATATGGCATTA
CCTTTCTCTGTGCTGACTGCGGGGGGATGGGGATCTGGGTGGGGGTTCGCTACGATTCTCTGCTTGATGTGGAGACTgGGCGGTTGAGATCGGAACTTGCTGGTGATAGATCTGCCTGTATGCTTCGTGTTGCATTGAATGGTGCTTAGATCTGTGGGATTGGTGATGGGATAGTCGGATTTGTCCATGTATTTGATACTTTCCCGGGTTGATTGCCATGGATTTGCGGGATATGGCATTA	19	33	Insertion	0.03	1	PFSVLTAGGWGSGWGFATILCLMWRLGG*	PFSVLTAGGWGSGWGFATILCLMWRRAVEIGTCW*	CCTTTCTCTGTGCTGACTGCGGGGGGATGGGGATCTGGGTGGGGGTTCGCTACGATTCTCTGCTTGATGTGGAGACTGGGCGGTTGAGATCGGAACTTGCTGGTGATAGATCTGCCTGTATGCTTCGTGTTGCATTGAATGGTGCTTAGATCTGTGGGATTGGTGATGGGATAGTCGGATTTGTCCATGTATTTGATACTTTCCCGGGTTGATTGCCATGGATTTGCGGGATATGGCATTA	CCTTTCTCTGTGCTGACTGCGGGGGGATGGGGATCTGGGTGGGGGTTCGCTACGATTCTCTGCTTGATGTGGAGACGGGCGGTTGAGATCGGAACTTGTTGGTGATAGATCTGCCTGTATGCTTCGTGTTGCATTGAATGGTGCTTAGATCTGTGGGATTGGTGATGGGATAGTCGGATTTGTCCATGTATTTGATACTTTCCCGGGTTGATTGCCATGGATTTGCGGGATATGGCATTA
CCTTTCTCTGTGCTGACTGCGGGGGGATGGGGATCTGGGTGGGGGTTCGCTACGATTCTCTGCTTGATGTGGAGACTgGGCGGTTGAGATCGGAACTTGTTGGTGATAGATCTGCCTGTATGCCTCGTGTTGCATTGAATGGTGCTTAGATCTGTGGGATTGGTGATGGGATAGTCGGATTTGTCCATGTATTTGATACTTTCCCGGGTTGATTGCCATGGATTTGCGGGATATGGCATTA	19	33	Insertion	0.03	1	PFSVLTAGGWGSGWGFATILCLMWRLGG*	PFSVLTAGGWGSGWGFATILCLMWRRAVEIGTCW*	CCTTTCTCTGTGCTGACTGCGGGGGGATGGGGATCTGGGTGGGGGTTCGCTACGATTCTCTGCTTGATGTGGAGACTGGGCGGTTGAGATCGGAACTTGTTGGTGATAGATCTGCCTGTATGCCTCGTGTTGCATTGAATGGTGCTTAGATCTGTGGGATTGGTGATGGGATAGTCGGATTTGTCCATGTATTTGATACTTTCCCGGGTTGATTGCCATGGATTTGCGGGATATGGCATTA	CCTTTCTCTGTGCTGACTGCGGGGGGATGGGGATCTGGGTGGGGGTTCGCTACGATTCTCTGCTTGATGTGGAGACGGGCGGTTGAGATCGGAACTTGTTGGTGATAGATCTGCCTGTATGCTTCGTGTTGCATTGAATGGTGCTTAGATCTGTGGGATTGGTGATGGGATAGTCGGATTTGTCCATGTATTTGATACTTTCCCGGGTTGATTGCCATGGATTTGCGGGATATGGCATTA
CCTTTCTCTGTGCTGACTGCGGGGGGATGGGGATCTGGGTGGGGGTTCGCTACGATTCTCTGCTTGATGTGGAGACTgGGCGGTTGAGATCGGAACTTGTTGGTGATAGATCTGCCTGTATGCTTCGTGTTGCATTGAATGGTGCTTAGATCTGTGGGATTGGTGATGGGATAGTCGGATTTGTCCATGTACTTGATACTTTCCCGGGTTGATTGCCATGGATTTGCGGGATATGGCATTA	19	33	Insertion	0.03	1	PFSVLTAGGWGSGWGFATILCLMWRLGG*	PFSVLTAGGWGSGWGFATILCLMWRRAVEIGTCW*	CCTTTCTCTGTGCTGACTGCGGGGGGATGGGGATCTGGGTGGGGGTTCGCTACGATTCTCTGCTTGATGTGGAGACTGGGCGGTTGAGATCGGAACTTGTTGGTGATAGATCTGCCTGTATGCTTCGTGTTGCATTGAATGGTGCTTAGATCTGTGGGATTGGTGATGGGATAGTCGGATTTGTCCATGTACTTGATACTTTCCCGGGTTGATTGCCATGGATTTGCGGGATATGGCATTA	CCTTTCTCTGTGCTGACTGCGGGGGGATGGGGATCTGGGTGGGGGTTCGCTACGATTCTCTGCTTGATGTGGAGACGGGCGGTTGAGATCGGAACTTGTTGGTGATAGATCTGCCTGTATGCTTCGTGTTGCATTGAATGGTGCTTAGATCTGTGGGATTGGTGATGGGATAGTCGGATTTGTCCATGTATTTGATACTTTCCCGGGTTGATTGCCATGGATTTGCGGGATATGGCATTA
CCTTTCTCTGTGCTGACTGCGGGGGGATGGGGATCTGGGTGGGGGTTCGCTACGATTCTCTGCTTGATGTGGAGACTgGGCGGTTGAGATCGGAACTTGTTGGTGATAGATCTGCCTGTATGCTTCGTGTTGCATTGAATGGTGCTTAGATCTGTGGGATTGGTGATGGGATAGTCGGATTTGTCCATGTATTTGATACTTTCCCGGGTTGGTTGCCATGGATTTGCGGGATATGGCATTA	19	33	Insertion	0.03	1	PFSVLTAGGWGSGWGFATILCLMWRLGG*	PFSVLTAGGWGSGWGFATILCLMWRRAVEIGTCW*	CCTTTCTCTGTGCTGACTGCGGGGGGATGGGGATCTGGGTGGGGGTTCGCTACGATTCTCTGCTTGATGTGGAGACTGGGCGGTTGAGATCGGAACTTGTTGGTGATAGATCTGCCTGTATGCTTCGTGTTGCATTGAATGGTGCTTAGATCTGTGGGATTGGTGATGGGATAGTCGGATTTGTCCATGTATTTGATACTTTCCCGGGTTGGTTGCCATGGATTTGCGGGATATGGCATTA	CCTTTCTCTGTGCTGACTGCGGGGGGATGGGGATCTGGGTGGGGGTTCGCTACGATTCTCTGCTTGATGTGGAGACGGGCGGTTGAGATCGGAACTTGTTGGTGATAGATCTGCCTGTATGCTTCGTGTTGCATTGAATGGTGCTTAGATCTGTGGGATTGGTGATGGGATAGTCGGATTTGTCCATGTATTTGATACTTTCCCGGGTTGATTGCCATGGATTTGCGGGATATGGCATTA
CCTTTCTCTGTGCTGACTGCGGGGGGATGGGGATCTGGGTGGGGGTTCGCTACGATTCTCTGCTTGATGTGGAGACTgGGCGGTTGAGATCGGAGCTTGTTGGTGATAGATCTGCCTGTATGCTTCGTGTTGCATTGAATGGTGCTTAGATCTGTGGGATTGGTGATGGGATAGTCGGATTTGTCCATGTATTTGATACTTTCCCGGGTTGATTGCCATGGATTTGCGGGATATGGCATTA	19	32	Insertion	0.03	1	PFSVLTAGGWGSGWGFATILCLMWRLGG*	PFSVLTAGGWGSGWGFATILCLMWRRAVEIGTCW*	CCTTTCTCTGTGCTGACTGCGGGGGGATGGGGATCTGGGTGGGGGTTCGCTACGATTCTCTGCTTGATGTGGAGACTGGGCGGTTGAGATCGGAGCTTGTTGGTGATAGATCTGCCTGTATGCTTCGTGTTGCATTGAATGGTGCTTAGATCTGTGGGATTGGTGATGGGATAGTCGGATTTGTCCATGTATTTGATACTTTCCCGGGTTGATTGCCATGGATTTGCGGGATATGGCATTA	CCTTTCTCTGTGCTGACTGCGGGGGGATGGGGATCTGGGTGGGGGTTCGCTACGATTCTCTGCTTGATGTGGAGACGGGCGGTTGAGATCGGAACTTGTTGGTGATAGATCTGCCTGTATGCTTCGTGTTGCATTGAATGGTGCTTAGATCTGTGGGATTGGTGATGGGATAGTCGGATTTGTCCATGTATTTGATACTTTCCCGGGTTGATTGCCATGGATTTGCGGGATATGGCATTA
CCTTTCTCTGTGCTGACTGCGGGGGGATGGGGATCTGGGTGGGGGTCCGCTACGATTCTCTGCTTGATGTGGAGACGGGCGGTTGAGATCGGAACTTGTTGGTGATAGATCTGCCTGTATGCTTCGTGTTGCATTGAATGGTGCTTAGATCTGTGGGATTGGTGATGGGATAGTCGGATTTGTCCATGTATTTGATACTTTCCCGGGTTGATTGCCATGGATTTGCGGGATATGGCATTA	18	34	1 Base Change	0.03	0	PFSVLTAGGWGSGWGSATILCLMWRRAVEIGTCW*	PFSVLTAGGWGSGWGFATILCLMWRRAVEIGTCW*	CCTTTCTCTGTGCTGACTGCGGGGGGATGGGGATCTGGGTGGGGGTCCGCTACGATTCTCTGCTTGATGTGGAGACGGGCGGTTGAGATCGGAACTTGTTGGTGATAGATCTGCCTGTATGCTTCGTGTTGCATTGAATGGTGCTTAGATCTGTGGGATTGGTGATGGGATAGTCGGATTTGTCCATGTATTTGATACTTTCCCGGGTTGATTGCCATGGATTTGCGGGATATGGCATTA	CCTTTCTCTGTGCTGACTGCGGGGGGATGGGGATCTGGGTGGGGGTTCGCTACGATTCTCTGCTTGATGTGGAGACGGGCGGTTGAGATCGGAACTTGTTGGTGATAGATCTGCCTGTATGCTTCGTGTTGCATTGAATGGTGCTTAGATCTGTGGGATTGGTGATGGGATAGTCGGATTTGTCCATGTATTTGATACTTTCCCGGGTTGATTGCCATGGATTTGCGGGATATGGCATTA
CCTTTCTCTGTGCTGACTGCGGGGGGATGGGGATCTGGGTGGGGGTTCGCTACGACTCTCTGCTTGATGTGGAGACGGGCGGTTGAGATCGGAACTTGTTGGTGATAGATCTGCCTGTATGCTTCGTGTTGCATTGAATGGTGCTTAGATCTGTGGGATTGGTGATGGGATAGTCGGATTTGTCCATGTATTTGATACTTTCCCGGGTTGATTGCCATGGATTTGCGGGATATGGCATTA	18	33	1 Base Change	0.03	0	PFSVLTAGGWGSGWGFATTLCLMWRRAVEIGTCW*	PFSVLTAGGWGSGWGFATILCLMWRRAVEIGTCW*	CCTTTCTCTGTGCTGACTGCGGGGGGATGGGGATCTGGGTGGGGGTTCGCTACGACTCTCTGCTTGATGTGGAGACGGGCGGTTGAGATCGGAACTTGTTGGTGATAGATCTGCCTGTATGCTTCGTGTTGCATTGAATGGTGCTTAGATCTGTGGGATTGGTGATGGGATAGTCGGATTTGTCCATGTATTTGATACTTTCCCGGGTTGATTGCCATGGATTTGCGGGATATGGCATTA	CCTTTCTCTGTGCTGACTGCGGGGGGATGGGGATCTGGGTGGGGGTTCGCTACGATTCTCTGCTTGATGTGGAGACGGGCGGTTGAGATCGGAACTTGTTGGTGATAGATCTGCCTGTATGCTTCGTGTTGCATTGAATGGTGCTTAGATCTGTGGGATTGGTGATGGGATAGTCGGATTTGTCCATGTATTTGATACTTTCCCGGGTTGATTGCCATGGATTTGCGGGATATGGCATTA
CCTTTCTCTGTGCTGACTGCGGGGGGATGGGGATCTGGGTGGGGGTTCGCTACGATTCTCCGCTTGATGTGGAGACGGGCGGTTGAGATCGGAACTTGTTGGTGATAGATCTGCCTGTATGCTTCGTGTTGCATTGAATGGTGCTTAGATCTGTGGGATTGGTGATGGGATAGTCGGATTTGTCCATGTATTTGATACTTTCCCGGGTTGATTGCCATGGATTTGCGGGATATGGCATTA	18	34	1 Base Change	0.03	0	PFSVLTAGGWGSGWGFATILRLMWRRAVEIGTCW*	PFSVLTAGGWGSGWGFATILCLMWRRAVEIGTCW*	CCTTTCTCTGTGCTGACTGCGGGGGGATGGGGATCTGGGTGGGGGTTCGCTACGATTCTCCGCTTGATGTGGAGACGGGCGGTTGAGATCGGAACTTGTTGGTGATAGATCTGCCTGTATGCTTCGTGTTGCATTGAATGGTGCTTAGATCTGTGGGATTGGTGATGGGATAGTCGGATTTGTCCATGTATTTGATACTTTCCCGGGTTGATTGCCATGGATTTGCGGGATATGGCATTA	CCTTTCTCTGTGCTGACTGCGGGGGGATGGGGATCTGGGTGGGGGTTCGCTACGATTCTCTGCTTGATGTGGAGACGGGCGGTTGAGATCGGAACTTGTTGGTGATAGATCTGCCTGTATGCTTCGTGTTGCATTGAATGGTGCTTAGATCTGTGGGATTGGTGATGGGATAGTCGGATTTGTCCATGTATTTGATACTTTCCCGGGTTGATTGCCATGGATTTGCGGGATATGGCATTA
CCTTTCTCTGTGCTGACTGCGGGGGGATGGGGATCTGGGTGGGGGTTCGCTACGATTCTCTGCCTGATGTGGAGACGGGCGGTTGAGATCGGAACTTGTTGGTGATAGATCTGCCTGTATGCTTCGTGTTGCATTGAATGGTGCTTAGATCTGTGGGATTGGTGATGGGATAGTCGGATTTGTCCATGTATTTGATACTTTCCCGGGTTGATTGCCATGGATTTGCGGGATATGGCATTA	18	34	1 Base Change	0.03	0	PFSVLTAGGWGSGWGFATILCLMWRRAVEIGTCW*	PFSVLTAGGWGSGWGFATILCLMWRRAVEIGTCW*	CCTTTCTCTGTGCTGACTGCGGGGGGATGGGGATCTGGGTGGGGGTTCGCTACGATTCTCTGCCTGATGTGGAGACGGGCGGTTGAGATCGGAACTTGTTGGTGATAGATCTGCCTGTATGCTTCGTGTTGCATTGAATGGTGCTTAGATCTGTGGGATTGGTGATGGGATAGTCGGATTTGTCCATGTATTTGATACTTTCCCGGGTTGATTGCCATGGATTTGCGGGATATGGCATTA	CCTTTCTCTGTGCTGACTGCGGGGGGATGGGGATCTGGGTGGGGGTTCGCTACGATTCTCTGCTTGATGTGGAGACGGGCGGTTGAGATCGGAACTTGTTGGTGATAGATCTGCCTGTATGCTTCGTGTTGCATTGAATGGTGCTTAGATCTGTGGGATTGGTGATGGGATAGTCGGATTTGTCCATGTATTTGATACTTTCCCGGGTTGATTGCCATGGATTTGCGGGATATGGCATTA
CCTTTCTCTGTGCTGACTGCGGGGGGATGGGGATCTGGGTGGGGGTTCGCTACGATTCTCTGCTTGATGTGGAGACGGGCGGTTGAGATCGGAACTTGTTGGTGATAGATCTGCCTGTATGCTTCGTGTTGCATTGAATGGTGCTTAGATCTGTGGGATCGGTGATGGGATAGTCGGATTTGTCCATGTATTTGATACTTTCCCGGGTTGATTGCCATGGATTTGCGGGATATGGCATTA	18	32	1 Base Change	0.03	0	PFSVLTAGGWGSGWGFATILCLMWRRAVEIGTCW*	PFSVLTAGGWGSGWGFATILCLMWRRAVEIGTCW*	CCTTTCTCTGTGCTGACTGCGGGGGGATGGGGATCTGGGTGGGGGTTCGCTACGATTCTCTGCTTGATGTGGAGACGGGCGGTTGAGATCGGAACTTGTTGGTGATAGATCTGCCTGTATGCTTCGTGTTGCATTGAATGGTGCTTAGATCTGTGGGATCGGTGATGGGATAGTCGGATTTGTCCATGTATTTGATACTTTCCCGGGTTGATTGCCATGGATTTGCGGGATATGGCATTA	CCTTTCTCTGTGCTGACTGCGGGGGGATGGGGATCTGGGTGGGGGTTCGCTACGATTCTCTGCTTGATGTGGAGACGGGCGGTTGAGATCGGAACTTGTTGGTGATAGATCTGCCTGTATGCTTCGTGTTGCATTGAATGGTGCTTAGATCTGTGGGATTGGTGATGGGATAGTCGGATTTGTCCATGTATTTGATACTTTCCCGGGTTGATTGCCATGGATTTGCGGGATATGGCATTA
CCTTTCTCTGTGCTGACTGCGGGGGGATGGGGATCTGGGTGGGGGTTCGCTACGATTCTCTGCTTGATGTGGAGACGGGCGGTTGAGATCGGAACTTGTTGGTGATAGATCTGCCTGTATGCTTCGTGTTGCATTGAATGGTGCTTAGATCTGTGGGATTGGTGATGGGATAGTCGGATTTGTCCACGTATTTGATACTTTCCCGGGTTGATTGCCATGGATTTGCGGGATATGGCATTA	18	33	1 Base Change	0.03	0	PFSVLTAGGWGSGWGFATILCLMWRRAVEIGTCW*	PFSVLTAGGWGSGWGFATILCLMWRRAVEIGTCW*	CCTTTCTCTGTGCTGACTGCGGGGGGATGGGGATCTGGGTGGGGGTTCGCTACGATTCTCTGCTTGATGTGGAGACGGGCGGTTGAGATCGGAACTTGTTGGTGATAGATCTGCCTGTATGCTTCGTGTTGCATTGAATGGTGCTTAGATCTGTGGGATTGGTGATGGGATAGTCGGATTTGTCCACGTATTTGATACTTTCCCGGGTTGATTGCCATGGATTTGCGGGATATGGCATTA	CCTTTCTCTGTGCTGACTGCGGGGGGATGGGGATCTGGGTGGGGGTTCGCTACGATTCTCTGCTTGATGTGGAGACGGGCGGTTGAGATCGGAACTTGTTGGTGATAGATCTGCCTGTATGCTTCGTGTTGCATTGAATGGTGCTTAGATCTGTGGGATTGGTGATGGGATAGTCGGATTTGTCCATGTATTTGATACTTTCCCGGGTTGATTGCCATGGATTTGCGGGATATGGCATTA
CCTTTCTCTGTGCTGACTGCGGGGGGATGGGGATCTGGGTGGGGGTTCGCTACGATTCTCTGCTTGATGTGGAGACGGGCGGTTGAGATCGGAACTTGTTGGTGATAGATCTGCCTGTATGCTTCGTGTTGCATTGAATGGTGCTTAGATCTGTGGGATTGGTGATGGGATAGTCGGATTTGTCCATGTATCTGATACTTTCCCGGGTTGATTGCCATGGATTTGCGGGATATGGCATTA	18	33	1 Base Change	0.03	0	PFSVLTAGGWGSGWGFATILCLMWRRAVEIGTCW*	PFSVLTAGGWGSGWGFATILCLMWRRAVEIGTCW*	CCTTTCTCTGTGCTGACTGCGGGGGGATGGGGATCTGGGTGGGGGTTCGCTACGATTCTCTGCTTGATGTGGAGACGGGCGGTTGAGATCGGAACTTGTTGGTGATAGATCTGCCTGTATGCTTCGTGTTGCATTGAATGGTGCTTAGATCTGTGGGATTGGTGATGGGATAGTCGGATTTGTCCATGTATCTGATACTTTCCCGGGTTGATTGCCATGGATTTGCGGGATATGGCATTA	CCTTTCTCTGTGCTGACTGCGGGGGGATGGGGATCTGGGTGGGGGTTCGCTACGATTCTCTGCTTGATGTGGAGACGGGCGGTTGAGATCGGAACTTGTTGGTGATAGATCTGCCTGTATGCTTCGTGTTGCATTGAATGGTGCTTAGATCTGTGGGATTGGTGATGGGATAGTCGGATTTGTCCATGTATTTGATACTTTCCCGGGTTGATTGCCATGGATTTGCGGGATATGGCATTA
CCTTTCTCTGTGCTGACTGCGGGGGGATGGGGATCTGGGTGGGGGTTCGCTACGATTCTCTGCTTGATGTGGAGACGGGCGGTTGAGATCGGAACTTGTTGGTGATAGATCTGCCTGTATGCTTCGTGTTGCATTGAATGGTGCTTAGATCTGTGGGATTGGTGATGGGATAGTCGGATTTGTCCATGTATTTGATACTTTCCCGGGTTGATCGCCATGGATTTGCGGGATATGGCATTA	18	33	1 Base Change	0.03	0	PFSVLTAGGWGSGWGFATILCLMWRRAVEIGTCW*	PFSVLTAGGWGSGWGFATILCLMWRRAVEIGTCW*	CCTTTCTCTGTGCTGACTGCGGGGGGATGGGGATCTGGGTGGGGGTTCGCTACGATTCTCTGCTTGATGTGGAGACGGGCGGTTGAGATCGGAACTTGTTGGTGATAGATCTGCCTGTATGCTTCGTGTTGCATTGAATGGTGCTTAGATCTGTGGGATTGGTGATGGGATAGTCGGATTTGTCCATGTATTTGATACTTTCCCGGGTTGATCGCCATGGATTTGCGGGATATGGCATTA	CCTTTCTCTGTGCTGACTGCGGGGGGATGGGGATCTGGGTGGGGGTTCGCTACGATTCTCTGCTTGATGTGGAGACGGGCGGTTGAGATCGGAACTTGTTGGTGATAGATCTGCCTGTATGCTTCGTGTTGCATTGAATGGTGCTTAGATCTGTGGGATTGGTGATGGGATAGTCGGATTTGTCCATGTATTTGATACTTTCCCGGGTTGATTGCCATGGATTTGCGGGATATGGCATTA
CCTTTCTCTGTGCTGACTGCGGGGGGATGGGGATCTGGGTGGGGGTTCGCTACGATTCTCTGCTTGATGTGGAGACGGGCGGTTGAGATCGGAACTTGTTGGTGATAGATCTGCCTGTATGCTTCGTGTTGCATTGAATGGTGCTTAGATCTGTGGGATTGGTGATGGGATAGTCGGATTTGTCCATGTATTTGATACTTTCCCGGGTTGATTGCCATGGATTTGCGGGATATGGC-TTA	18	33	Deletion	0.03	-1	PFSVLTAGGWGSGWGFATILCLMWRRAVEIGTCW*	PFSVLTAGGWGSGWGFATILCLMWRRAVEIGTCW*	CCTTTCTCTGTGCTGACTGCGGGGGGATGGGGATCTGGGTGGGGGTTCGCTACGATTCTCTGCTTGATGTGGAGACGGGCGGTTGAGATCGGAACTTGTTGGTGATAGATCTGCCTGTATGCTTCGTGTTGCATTGAATGGTGCTTAGATCTGTGGGATTGGTGATGGGATAGTCGGATTTGTCCATGTATTTGATACTTTCCCGGGTTGATTGCCATGGATTTGCGGGATATGGC-TTA	CCTTTCTCTGTGCTGACTGCGGGGGGATGGGGATCTGGGTGGGGGTTCGCTACGATTCTCTGCTTGATGTGGAGACGGGCGGTTGAGATCGGAACTTGTTGGTGATAGATCTGCCTGTATGCTTCGTGTTGCATTGAATGGTGCTTAGATCTGTGGGATTGGTGATGGGATAGTCGGATTTGTCCATGTATTTGATACTTTCCCGGGTTGATTGCCATGGATTTGCGGGATATGGCATTA
CCTTTCTCTGTGCTGACTGCGGGGGGATGGGGATCTGGGTGGGGGTTCGCTACGATTCTCTGCTTGATGTGGAGACGGGCGGTTGAGATCGGAACTTGTTGGTGATAGGTCTGCCTGTATGCTTCGTGTTGCATTGAATGGTGCTTAGATCTGTGGGATTGGTGATGGGATAGTCGGATTTGTCCATGTATTTGATACTTTCCCGGGTTGATTGCCATGGATTTGCGGGATATGGCATTA	18	33	1 Base Change	0.03	0	PFSVLTAGGWGSGWGFATILCLMWRRAVEIGTCW*	PFSVLTAGGWGSGWGFATILCLMWRRAVEIGTCW*	CCTTTCTCTGTGCTGACTGCGGGGGGATGGGGATCTGGGTGGGGGTTCGCTACGATTCTCTGCTTGATGTGGAGACGGGCGGTTGAGATCGGAACTTGTTGGTGATAGGTCTGCCTGTATGCTTCGTGTTGCATTGAATGGTGCTTAGATCTGTGGGATTGGTGATGGGATAGTCGGATTTGTCCATGTATTTGATACTTTCCCGGGTTGATTGCCATGGATTTGCGGGATATGGCATTA	CCTTTCTCTGTGCTGACTGCGGGGGGATGGGGATCTGGGTGGGGGTTCGCTACGATTCTCTGCTTGATGTGGAGACGGGCGGTTGAGATCGGAACTTGTTGGTGATAGATCTGCCTGTATGCTTCGTGTTGCATTGAATGGTGCTTAGATCTGTGGGATTGGTGATGGGATAGTCGGATTTGTCCATGTATTTGATACTTTCCCGGGTTGATTGCCATGGATTTGCGGGATATGGCATTA
CCTTTCTCTGTGCTGACTGCGGGGGGATGGGGATCTGGGTGGGGGTTCGCTACGATTCTCTGCTTGATGTGGAGACGGGCGGTTGAGATCGGAGCTTGTTGGTGATAGATCTGCCTGTATGCTTCGTGTTGCATTGAATGGTGCTTAGATCTGTGGGATTGGTGATGGGATAGTCGGATTTGTCCATGTATTTGATACTTTCCCGGGTTGATTGCCATGGATTTGCGGGATATGGCATTA	18	33	1 Base Change	0.03	0	PFSVLTAGGWGSGWGFATILCLMWRRAVEIGACW*	PFSVLTAGGWGSGWGFATILCLMWRRAVEIGTCW*	CCTTTCTCTGTGCTGACTGCGGGGGGATGGGGATCTGGGTGGGGGTTCGCTACGATTCTCTGCTTGATGTGGAGACGGGCGGTTGAGATCGGAGCTTGTTGGTGATAGATCTGCCTGTATGCTTCGTGTTGCATTGAATGGTGCTTAGATCTGTGGGATTGGTGATGGGATAGTCGGATTTGTCCATGTATTTGATACTTTCCCGGGTTGATTGCCATGGATTTGCGGGATATGGCATTA	CCTTTCTCTGTGCTGACTGCGGGGGGATGGGGATCTGGGTGGGGGTTCGCTACGATTCTCTGCTTGATGTGGAGACGGGCGGTTGAGATCGGAACTTGTTGGTGATAGATCTGCCTGTATGCTTCGTGTTGCATTGAATGGTGCTTAGATCTGTGGGATTGGTGATGGGATAGTCGGATTTGTCCATGTATTTGATACTTTCCCGGGTTGATTGCCATGGATTTGCGGGATATGGCATTA
CCTTTCTCTGTGCTGACTGCGGGGGGATGGGGATCTGGGTGGGGGTTCGCTACGATTCTCTGCTTGATGTGGAGACTgGGCGGTTGAGATCGGAACTTGTTGGTGATAGATCTGCCTGTATGCTTCGTGCTGCATTGAATGGTGCTTAGATCTGTGGGATTGGTGATGGGATAGTCGGATTTGTCCATGTATTTGATACTTTCCCGGGTTGATTGCCATGGATTTGCGGGATATGGCATTA	18	32	Insertion	0.03	1	PFSVLTAGGWGSGWGFATILCLMWRLGG*	PFSVLTAGGWGSGWGFATILCLMWRRAVEIGTCW*	CCTTTCTCTGTGCTGACTGCGGGGGGATGGGGATCTGGGTGGGGGTTCGCTACGATTCTCTGCTTGATGTGGAGACTGGGCGGTTGAGATCGGAACTTGTTGGTGATAGATCTGCCTGTATGCTTCGTGCTGCATTGAATGGTGCTTAGATCTGTGGGATTGGTGATGGGATAGTCGGATTTGTCCATGTATTTGATACTTTCCCGGGTTGATTGCCATGGATTTGCGGGATATGGCATTA	CCTTTCTCTGTGCTGACTGCGGGGGGATGGGGATCTGGGTGGGGGTTCGCTACGATTCTCTGCTTGATGTGGAGACGGGCGGTTGAGATCGGAACTTGTTGGTGATAGATCTGCCTGTATGCTTCGTGTTGCATTGAATGGTGCTTAGATCTGTGGGATTGGTGATGGGATAGTCGGATTTGTCCATGTATTTGATACTTTCCCGGGTTGATTGCCATGGATTTGCGGGATATGGCATTA
CCTTTCTCTGTGCTGACTGCGGGGGGATGGGGATCTGGGTGGGGGTTCGCTACGATTCTCTGCTTGATGTGGAGACTgGGCGGTTGAGATCGGAACTTGTTGGTGATAGATCTGCCTGTATGCTTCGTGTTGCATTGAATGGTGCTTAGATCCGTGGGATTGGTGATGGGATAGTCGGATTTGTCCATGTATTTGATACTTTCCCGGGTTGATTGCCATGGATTTGCGGGATATGGCATTA	18	33	Insertion	0.03	1	PFSVLTAGGWGSGWGFATILCLMWRLGG*	PFSVLTAGGWGSGWGFATILCLMWRRAVEIGTCW*	CCTTTCTCTGTGCTGACTGCGGGGGGATGGGGATCTGGGTGGGGGTTCGCTACGATTCTCTGCTTGATGTGGAGACTGGGCGGTTGAGATCGGAACTTGTTGGTGATAGATCTGCCTGTATGCTTCGTGTTGCATTGAATGGTGCTTAGATCCGTGGGATTGGTGATGGGATAGTCGGATTTGTCCATGTATTTGATACTTTCCCGGGTTGATTGCCATGGATTTGCGGGATATGGCATTA	CCTTTCTCTGTGCTGACTGCGGGGGGATGGGGATCTGGGTGGGGGTTCGCTACGATTCTCTGCTTGATGTGGAGACGGGCGGTTGAGATCGGAACTTGTTGGTGATAGATCTGCCTGTATGCTTCGTGTTGCATTGAATGGTGCTTAGATCTGTGGGATTGGTGATGGGATAGTCGGATTTGTCCATGTATTTGATACTTTCCCGGGTTGATTGCCATGGATTTGCGGGATATGGCATTA
CCTTTCTCTGTGCTGACTGCGGGGGGATGGGGATCTGGGTGGGGGTTCGCTACGATTCTCTGCTTGATGTGGAGACTgGGCGGTTGAGATCGGAACTTGTTGGTGATAGATCTGCCTGTATGCTTCGTGTTGCATTGAGTGGTGCTTAGATCTGTGGGATTGGTGATGGGATAGTCGGATTTGTCCATGTATTTGATACTTTCCCGGGTTGATTGCCATGGATTTGCGGGATATGGCATTA	18	33	Insertion	0.03	1	PFSVLTAGGWGSGWGFATILCLMWRLGG*	PFSVLTAGGWGSGWGFATILCLMWRRAVEIGTCW*	CCTTTCTCTGTGCTGACTGCGGGGGGATGGGGATCTGGGTGGGGGTTCGCTACGATTCTCTGCTTGATGTGGAGACTGGGCGGTTGAGATCGGAACTTGTTGGTGATAGATCTGCCTGTATGCTTCGTGTTGCATTGAGTGGTGCTTAGATCTGTGGGATTGGTGATGGGATAGTCGGATTTGTCCATGTATTTGATACTTTCCCGGGTTGATTGCCATGGATTTGCGGGATATGGCATTA	CCTTTCTCTGTGCTGACTGCGGGGGGATGGGGATCTGGGTGGGGGTTCGCTACGATTCTCTGCTTGATGTGGAGACGGGCGGTTGAGATCGGAACTTGTTGGTGATAGATCTGCCTGTATGCTTCGTGTTGCATTGAATGGTGCTTAGATCTGTGGGATTGGTGATGGGATAGTCGGATTTGTCCATGTATTTGATACTTTCCCGGGTTGATTGCCATGGATTTGCGGGATATGGCATTA
CCTTTCTCTGTGCTGACTGCGGGGGGATGGGGATCTGGGTGGGGGTTCGCTACGATTCTCTGCTTGATGTGGAGACTgGGCGGTTGAGATCGGAACTTGTTGGTGATAGATCTGCCTGTATGCTTCGTGTTGCGTTGAATGGTGCTTAGATCTGTGGGATTGGTGATGGGATAGTCGGATTTGTCCATGTATTTGATACTTTCCCGGGTTGATTGCCATGGATTTGCGGGATATGGCATTA	18	33	Insertion	0.03	1	PFSVLTAGGWGSGWGFATILCLMWRLGG*	PFSVLTAGGWGSGWGFATILCLMWRRAVEIGTCW*	CCTTTCTCTGTGCTGACTGCGGGGGGATGGGGATCTGGGTGGGGGTTCGCTACGATTCTCTGCTTGATGTGGAGACTGGGCGGTTGAGATCGGAACTTGTTGGTGATAGATCTGCCTGTATGCTTCGTGTTGCGTTGAATGGTGCTTAGATCTGTGGGATTGGTGATGGGATAGTCGGATTTGTCCATGTATTTGATACTTTCCCGGGTTGATTGCCATGGATTTGCGGGATATGGCATTA	CCTTTCTCTGTGCTGACTGCGGGGGGATGGGGATCTGGGTGGGGGTTCGCTACGATTCTCTGCTTGATGTGGAGACGGGCGGTTGAGATCGGAACTTGTTGGTGATAGATCTGCCTGTATGCTTCGTGTTGCATTGAATGGTGCTTAGATCTGTGGGATTGGTGATGGGATAGTCGGATTTGTCCATGTATTTGATACTTTCCCGGGTTGATTGCCATGGATTTGCGGGATATGGCATTA
CCTTTCTCTGTGCTGACTGCGGGGGGATGGGGGTCTGGGTGGGGGTTCGCTACGATTCTCTGCTTGATGTGGAGACGGGCGGTTGAGATCGGAACTTGTTGGTGATAGATCTGCCTGTATGCTTCGTGTTGCATTGAATGGTGCTTAGATCTGTGGGATTGGTGATGGGATAGTCGGATTTGTCCATGTATTTGATACTTTCCCGGGTTGATTGCCATGGATTTGCGGGATATGGCATTA	18	33	1 Base Change	0.03	0	PFSVLTAGGWGSGWGFATILCLMWRRAVEIGTCW*	PFSVLTAGGWGSGWGFATILCLMWRRAVEIGTCW*	CCTTTCTCTGTGCTGACTGCGGGGGGATGGGGGTCTGGGTGGGGGTTCGCTACGATTCTCTGCTTGATGTGGAGACGGGCGGTTGAGATCGGAACTTGTTGGTGATAGATCTGCCTGTATGCTTCGTGTTGCATTGAATGGTGCTTAGATCTGTGGGATTGGTGATGGGATAGTCGGATTTGTCCATGTATTTGATACTTTCCCGGGTTGATTGCCATGGATTTGCGGGATATGGCATTA	CCTTTCTCTGTGCTGACTGCGGGGGGATGGGGATCTGGGTGGGGGTTCGCTACGATTCTCTGCTTGATGTGGAGACGGGCGGTTGAGATCGGAACTTGTTGGTGATAGATCTGCCTGTATGCTTCGTGTTGCATTGAATGGTGCTTAGATCTGTGGGATTGGTGATGGGATAGTCGGATTTGTCCATGTATTTGATACTTTCCCGGGTTGATTGCCATGGATTTGCGGGATATGGCATTA
CCTTTCT-TGTGCTGACTGCGGGGGGATGGGGATCTGGGTGGGGGTTCGCTACGATTCTCTGCTTGATGTGGAGACcGGGCGGTTGAGATCGGAACTTGTTGGTGATAGATCTGCCTGTATGCTTCGTGTTGCATTGAATGGTGCTTAGATCTGTGGGATTGGTGATGGGATAGTCGGATTTGTCCATGTATTTGATACTTTCCCGGGTTGATTGCCATGGATTTGCGGGATATGGCATTA	17	33	Insertion and Deletion	0.03	0	PFLC*	PFSVLTAGGWGSGWGFATILCLMWRRAVEIGTCW*	CCTTTCT-TGTGCTGACTGCGGGGGGATGGGGATCTGGGTGGGGGTTCGCTACGATTCTCTGCTTGATGTGGAGACCGGGCGGTTGAGATCGGAACTTGTTGGTGATAGATCTGCCTGTATGCTTCGTGTTGCATTGAATGGTGCTTAGATCTGTGGGATTGGTGATGGGATAGTCGGATTTGTCCATGTATTTGATACTTTCCCGGGTTGATTGCCATGGATTTGCGGGATATGGCATTA	CCTTTCTCTGTGCTGACTGCGGGGGGATGGGGATCTGGGTGGGGGTTCGCTACGATTCTCTGCTTGATGTGGAGACGGGCGGTTGAGATCGGAACTTGTTGGTGATAGATCTGCCTGTATGCTTCGTGTTGCATTGAATGGTGCTTAGATCTGTGGGATTGGTGATGGGATAGTCGGATTTGTCCATGTATTTGATACTTTCCCGGGTTGATTGCCATGGATTTGCGGGATATGGCATTA
CCTTTCTC-GTGCTGACTGCGGGGGGATGGGGATCTGGGTGGGGGTTCGCTACGATTCTCTGCTTGATGTGGAGACGGGCGGTTGAGATCGGAACTTGTTGGTGATAGATCTGCCTGTATGCTTCGTGTTGCATTGAATGGTGCTTAGATCTGTGGGATTGGTGATGGGATAGTCGGATTTGTCCATGTATTTGATACTTTCCCGGGTTGATTGCCATGGATTTGCGGGATATGGCATTA	17	33	Deletion	0.03	-1	PFSC*	PFSVLTAGGWGSGWGFATILCLMWRRAVEIGTCW*	CCTTTCTC-GTGCTGACTGCGGGGGGATGGGGATCTGGGTGGGGGTTCGCTACGATTCTCTGCTTGATGTGGAGACGGGCGGTTGAGATCGGAACTTGTTGGTGATAGATCTGCCTGTATGCTTCGTGTTGCATTGAATGGTGCTTAGATCTGTGGGATTGGTGATGGGATAGTCGGATTTGTCCATGTATTTGATACTTTCCCGGGTTGATTGCCATGGATTTGCGGGATATGGCATTA	CCTTTCTCTGTGCTGACTGCGGGGGGATGGGGATCTGGGTGGGGGTTCGCTACGATTCTCTGCTTGATGTGGAGACGGGCGGTTGAGATCGGAACTTGTTGGTGATAGATCTGCCTGTATGCTTCGTGTTGCATTGAATGGTGCTTAGATCTGTGGGATTGGTGATGGGATAGTCGGATTTGTCCATGTATTTGATACTTTCCCGGGTTGATTGCCATGGATTTGCGGGATATGGCATTA
CCTTTCTCTGTGCTGACTGCGGGGGGATGGGGATCTGGGTGGGGGTTCGCTACGATCCTCTGCTTGATGTGGAGACTgGGCGGTTGAGATCGGAACTTGTTGGTGATAGATCTGCCTGTATGCTTCGTGTTGCATTGAATGGTGCTTAGATCTGTGGGATTGGTGATGGGATAGTCGGATTTGTCCATGTATTTGATACTTTCCCGGGTTGATTGCCATGGATTTGCGGGATATGGCATTA	17	32	Insertion	0.03	1	PFSVLTAGGWGSGWGFATILCLMWRLGG*	PFSVLTAGGWGSGWGFATILCLMWRRAVEIGTCW*	CCTTTCTCTGTGCTGACTGCGGGGGGATGGGGATCTGGGTGGGGGTTCGCTACGATCCTCTGCTTGATGTGGAGACTGGGCGGTTGAGATCGGAACTTGTTGGTGATAGATCTGCCTGTATGCTTCGTGTTGCATTGAATGGTGCTTAGATCTGTGGGATTGGTGATGGGATAGTCGGATTTGTCCATGTATTTGATACTTTCCCGGGTTGATTGCCATGGATTTGCGGGATATGGCATTA	CCTTTCTCTGTGCTGACTGCGGGGGGATGGGGATCTGGGTGGGGGTTCGCTACGATTCTCTGCTTGATGTGGAGACGGGCGGTTGAGATCGGAACTTGTTGGTGATAGATCTGCCTGTATGCTTCGTGTTGCATTGAATGGTGCTTAGATCTGTGGGATTGGTGATGGGATAGTCGGATTTGTCCATGTATTTGATACTTTCCCGGGTTGATTGCCATGGATTTGCGGGATATGGCATTA
CCTTTCTCTGTGCTGACTGCGGGGGGATGGGGATCTGGGTGGGGGTTCGCTACGATTCTCTGCTTGATGTG-------------GAGATCGGAACTTGTTGGTGATAGATCTGCCTGTATGCTTCGTGTTGCATTGAATGGTGCTTAGATCTGTGGGATTGGTGATGGGATAGTCGGATTTGTCCATGTATTTGATACTTTCCCGGGTTGATTGCCATGGATTTGCGGGATAT-GCATTA	17	33	Deletion	0.03	-14	PFSVLTAGGWGSGWGFATILCLMWRSELVGDRSACMLRVALNGA*	PFSVLTAGGWGSGWGFATILCLMWRRAVEIGTCW*	CCTTTCTCTGTGCTGACTGCGGGGGGATGGGGATCTGGGTGGGGGTTCGCTACGATTCTCTGCTTGATGTG-------------GAGATCGGAACTTGTTGGTGATAGATCTGCCTGTATGCTTCGTGTTGCATTGAATGGTGCTTAGATCTGTGGGATTGGTGATGGGATAGTCGGATTTGTCCATGTATTTGATACTTTCCCGGGTTGATTGCCATGGATTTGCGGGATAT-GCATTA	CCTTTCTCTGTGCTGACTGCGGGGGGATGGGGATCTGGGTGGGGGTTCGCTACGATTCTCTGCTTGATGTGGAGACGGGCGGTTGAGATCGGAACTTGTTGGTGATAGATCTGCCTGTATGCTTCGTGTTGCATTGAATGGTGCTTAGATCTGTGGGATTGGTGATGGGATAGTCGGATTTGTCCATGTATTTGATACTTTCCCGGGTTGATTGCCATGGATTTGCGGGATATGGCATTA
CCTTTCTCTGTGCTGACTGCGGGGGGATGGGGATCTGGGTGGGGGTTCGCTACGATTCTCTGCTTGATGTGG---CGGGCGGTTGAGATCGGAACTTGTTGGTGATAGATCTGCCTGTATGCTTCGTGTTGCATTGAATGGTGCTTAGATCTGTGGGATTGGTGATGGGGTAGTCGGATTTGTCCATGTATTTGATACTTTCCCGGGTTGATTGCCATGGATTTGCGGGATATGGCATTA	17	29	Deletion	0.03	-3	PFSVLTAGGWGSGWGFATILCLMWRAVEIGTCW*	PFSVLTAGGWGSGWGFATILCLMWRRAVEIGTCW*	CCTTTCTCTGTGCTGACTGCGGGGGGATGGGGATCTGGGTGGGGGTTCGCTACGATTCTCTGCTTGATGTGG---CGGGCGGTTGAGATCGGAACTTGTTGGTGATAGATCTGCCTGTATGCTTCGTGTTGCATTGAATGGTGCTTAGATCTGTGGGATTGGTGATGGGGTAGTCGGATTTGTCCATGTATTTGATACTTTCCCGGGTTGATTGCCATGGATTTGCGGGATATGGCATTA	CCTTTCTCTGTGCTGACTGCGGGGGGATGGGGATCTGGGTGGGGGTTCGCTACGATTCTCTGCTTGATGTGGAGACGGGCGGTTGAGATCGGAACTTGTTGGTGATAGATCTGCCTGTATGCTTCGTGTTGCATTGAATGGTGCTTAGATCTGTGGGATTGGTGATGGGATAGTCGGATTTGTCCATGTATTTGATACTTTCCCGGGTTGATTGCCATGGATTTGCGGGATATGGCATTA
CCTTTCTCTGTGCTGACTGCGGGGGGATGGGGATCTGGGTGGGGGTTCGCTACGATTCTCTGCTTGATGTGGAGACcGGGCGGTTGAGATCGGAACTTGTTGGTGATAGATCTGCCTGTATGCTTCGTGTTGCATTGAATGGTGCTTAGATCTGTGGGATTGGTGATGGGATAGTCGGATTTGTCCATGTATTTGATACTTTCCCGGGTTGATTGCCGTGGATTTGCGGGATATGGCATTA	17	33	Insertion	0.03	1	PFSVLTAGGWGSGWGFATILCLMWRPGG*	PFSVLTAGGWGSGWGFATILCLMWRRAVEIGTCW*	CCTTTCTCTGTGCTGACTGCGGGGGGATGGGGATCTGGGTGGGGGTTCGCTACGATTCTCTGCTTGATGTGGAGACCGGGCGGTTGAGATCGGAACTTGTTGGTGATAGATCTGCCTGTATGCTTCGTGTTGCATTGAATGGTGCTTAGATCTGTGGGATTGGTGATGGGATAGTCGGATTTGTCCATGTATTTGATACTTTCCCGGGTTGATTGCCGTGGATTTGCGGGATATGGCATTA	CCTTTCTCTGTGCTGACTGCGGGGGGATGGGGATCTGGGTGGGGGTTCGCTACGATTCTCTGCTTGATGTGGAGACGGGCGGTTGAGATCGGAACTTGTTGGTGATAGATCTGCCTGTATGCTTCGTGTTGCATTGAATGGTGCTTAGATCTGTGGGATTGGTGATGGGATAGTCGGATTTGTCCATGTATTTGATACTTTCCCGGGTTGATTGCCATGGATTTGCGGGATATGGCATTA
CCTTTCTCTGTGCTGACTGCGGGGGGATGGGGATCTGGGTGGGGGTTCGCTACGATTCTCTGCTTGATGTGGAGACcGGGCGGTTGGGATCGGAACTTGTTGGTGATAGATCTGCCTGTATGCTTCGTGTTGCATTGAATGGTGCTTAGATCTGTGGGATTGGTGATGGGATAGTCGGATTTGTCCATGTATTTGATACTTTCCCGGGTTGATTGCCATGGATTTGCGGGATATGGCATTA	17	34	Insertion	0.03	1	PFSVLTAGGWGSGWGFATILCLMWRPGGWDRNLLVIDLPVCFVLH*	PFSVLTAGGWGSGWGFATILCLMWRRAVEIGTCW*	CCTTTCTCTGTGCTGACTGCGGGGGGATGGGGATCTGGGTGGGGGTTCGCTACGATTCTCTGCTTGATGTGGAGACCGGGCGGTTGGGATCGGAACTTGTTGGTGATAGATCTGCCTGTATGCTTCGTGTTGCATTGAATGGTGCTTAGATCTGTGGGATTGGTGATGGGATAGTCGGATTTGTCCATGTATTTGATACTTTCCCGGGTTGATTGCCATGGATTTGCGGGATATGGCATTA	CCTTTCTCTGTGCTGACTGCGGGGGGATGGGGATCTGGGTGGGGGTTCGCTACGATTCTCTGCTTGATGTGGAGACGGGCGGTTGAGATCGGAACTTGTTGGTGATAGATCTGCCTGTATGCTTCGTGTTGCATTGAATGGTGCTTAGATCTGTGGGATTGGTGATGGGATAGTCGGATTTGTCCATGTATTTGATACTTTCCCGGGTTGATTGCCATGGATTTGCGGGATATGGCATTA
CCTTTCTCTGTGCTGACTGCGGGGGGATGGGGATCTGGGTGGGGGTTCGCTACGATTCTCTGCTTGATGTGGAGACGGGCGGTTGAGATCGGAACTTGTTGGTGATAGATCTGCCTGTATGCTTCGTGTTGCATTGAATGGTGCTTAGATCTGTGGGATTGGTGATGGGATAGTCGGATTTGTCCATGTATTTGATACTTTCCCGGGTTGATTGCCGTGGATTTGCGGGATATGGCATTA	17	33	1 Base Change	0.03	0	PFSVLTAGGWGSGWGFATILCLMWRRAVEIGTCW*	PFSVLTAGGWGSGWGFATILCLMWRRAVEIGTCW*	CCTTTCTCTGTGCTGACTGCGGGGGGATGGGGATCTGGGTGGGGGTTCGCTACGATTCTCTGCTTGATGTGGAGACGGGCGGTTGAGATCGGAACTTGTTGGTGATAGATCTGCCTGTATGCTTCGTGTTGCATTGAATGGTGCTTAGATCTGTGGGATTGGTGATGGGATAGTCGGATTTGTCCATGTATTTGATACTTTCCCGGGTTGATTGCCGTGGATTTGCGGGATATGGCATTA	CCTTTCTCTGTGCTGACTGCGGGGGGATGGGGATCTGGGTGGGGGTTCGCTACGATTCTCTGCTTGATGTGGAGACGGGCGGTTGAGATCGGAACTTGTTGGTGATAGATCTGCCTGTATGCTTCGTGTTGCATTGAATGGTGCTTAGATCTGTGGGATTGGTGATGGGATAGTCGGATTTGTCCATGTATTTGATACTTTCCCGGGTTGATTGCCATGGATTTGCGGGATATGGCATTA
CCTTTCTCTGTGCTGACTGCGGGGGGATGGGGATCTGGGTGGGGGTTCGCTACGATTCTCTGCTTGATGTGGAGACTgGGCGGTTGAGATCGGAACTTGTTGGTGATAGATCCGCCTGTATGCTTCGTGTTGCATTGAATGGTGCTTAGATCTGTGGGATTGGTGATGGGATAGTCGGATTTGTCCATGTATTTGATACTTTCCCGGGTTGATTGCCATGGATTTGCGGGATATGGCATTA	17	32	Insertion	0.03	1	PFSVLTAGGWGSGWGFATILCLMWRLGG*	PFSVLTAGGWGSGWGFATILCLMWRRAVEIGTCW*	CCTTTCTCTGTGCTGACTGCGGGGGGATGGGGATCTGGGTGGGGGTTCGCTACGATTCTCTGCTTGATGTGGAGACTGGGCGGTTGAGATCGGAACTTGTTGGTGATAGATCCGCCTGTATGCTTCGTGTTGCATTGAATGGTGCTTAGATCTGTGGGATTGGTGATGGGATAGTCGGATTTGTCCATGTATTTGATACTTTCCCGGGTTGATTGCCATGGATTTGCGGGATATGGCATTA	CCTTTCTCTGTGCTGACTGCGGGGGGATGGGGATCTGGGTGGGGGTTCGCTACGATTCTCTGCTTGATGTGGAGACGGGCGGTTGAGATCGGAACTTGTTGGTGATAGATCTGCCTGTATGCTTCGTGTTGCATTGAATGGTGCTTAGATCTGTGGGATTGGTGATGGGATAGTCGGATTTGTCCATGTATTTGATACTTTCCCGGGTTGATTGCCATGGATTTGCGGGATATGGCATTA
CCTTTCTCTGTGCTGACTGCGGGGGGATGGGGATCTGGGTGGGGGTTCGCTACGATTCTCTGCTTGATGTGGAGACTgGGCGGTTGAGATCGGAACTTGTTGGTGATAGATCTGCCTGTATGCTTCGTGTTGCATTGAATGGTGCTTAGATCTGTGGGATTGGTGACGGGATAGTCGGATTTGTCCATGTATTTGATACTTTCCCGGGTTGATTGCCATGGATTTGCGGGATATGGCATTA	17	34	Insertion	0.03	1	PFSVLTAGGWGSGWGFATILCLMWRLGG*	PFSVLTAGGWGSGWGFATILCLMWRRAVEIGTCW*	CCTTTCTCTGTGCTGACTGCGGGGGGATGGGGATCTGGGTGGGGGTTCGCTACGATTCTCTGCTTGATGTGGAGACTGGGCGGTTGAGATCGGAACTTGTTGGTGATAGATCTGCCTGTATGCTTCGTGTTGCATTGAATGGTGCTTAGATCTGTGGGATTGGTGACGGGATAGTCGGATTTGTCCATGTATTTGATACTTTCCCGGGTTGATTGCCATGGATTTGCGGGATATGGCATTA	CCTTTCTCTGTGCTGACTGCGGGGGGATGGGGATCTGGGTGGGGGTTCGCTACGATTCTCTGCTTGATGTGGAGACGGGCGGTTGAGATCGGAACTTGTTGGTGATAGATCTGCCTGTATGCTTCGTGTTGCATTGAATGGTGCTTAGATCTGTGGGATTGGTGATGGGATAGTCGGATTTGTCCATGTATTTGATACTTTCCCGGGTTGATTGCCATGGATTTGCGGGATATGGCATTA
CCTTTCTCTGTGCTGACTGCGGGGGGATGGGGATCTGGGTGGGGGTTCGCTACGATTCTCTGCTTGATGTGGAGACTgGGCGGTTGAGATCGGAACTTGTTGGTGATAGATCTGCCTGTATGCTTCGTGTTGCATTGAATGGTGCTTAGATCTGTGGGATTGGTGATGGGATAGTCGGATTTGTCCATGTATTTGATACTTTCCCGGGTTGATTGCCATGGATTTGCGGGAT-TGGCATTA	17	34	Insertion and Deletion	0.03	0	PFSVLTAGGWGSGWGFATILCLMWRLGG*	PFSVLTAGGWGSGWGFATILCLMWRRAVEIGTCW*	CCTTTCTCTGTGCTGACTGCGGGGGGATGGGGATCTGGGTGGGGGTTCGCTACGATTCTCTGCTTGATGTGGAGACTGGGCGGTTGAGATCGGAACTTGTTGGTGATAGATCTGCCTGTATGCTTCGTGTTGCATTGAATGGTGCTTAGATCTGTGGGATTGGTGATGGGATAGTCGGATTTGTCCATGTATTTGATACTTTCCCGGGTTGATTGCCATGGATTTGCGGGAT-TGGCATTA	CCTTTCTCTGTGCTGACTGCGGGGGGATGGGGATCTGGGTGGGGGTTCGCTACGATTCTCTGCTTGATGTGGAGACGGGCGGTTGAGATCGGAACTTGTTGGTGATAGATCTGCCTGTATGCTTCGTGTTGCATTGAATGGTGCTTAGATCTGTGGGATTGGTGATGGGATAGTCGGATTTGTCCATGTATTTGATACTTTCCCGGGTTGATTGCCATGGATTTGCGGGATATGGCATTA
CCTTTCTCTGTGCTGACTGCGGGGGGATGGGGATCTGGGTGGGGGTTCGCTACGATTCTCTGCTTGATGTGGAGACTgGGCGGTTGAGATCGGAACTTGTTGGTGATAGATCTGCCTGTATGCTTCGTGTTGCATTGGATGGTGCTTAGATCTGTGGGATTGGTGATGGGATAGTCGGATTTGTCCATGTATTTGATACTTTCCCGGGTTGATTGCCATGGATTTGCGGGATATGGCATTA	17	32	Insertion	0.03	1	PFSVLTAGGWGSGWGFATILCLMWRLGG*	PFSVLTAGGWGSGWGFATILCLMWRRAVEIGTCW*	CCTTTCTCTGTGCTGACTGCGGGGGGATGGGGATCTGGGTGGGGGTTCGCTACGATTCTCTGCTTGATGTGGAGACTGGGCGGTTGAGATCGGAACTTGTTGGTGATAGATCTGCCTGTATGCTTCGTGTTGCATTGGATGGTGCTTAGATCTGTGGGATTGGTGATGGGATAGTCGGATTTGTCCATGTATTTGATACTTTCCCGGGTTGATTGCCATGGATTTGCGGGATATGGCATTA	CCTTTCTCTGTGCTGACTGCGGGGGGATGGGGATCTGGGTGGGGGTTCGCTACGATTCTCTGCTTGATGTGGAGACGGGCGGTTGAGATCGGAACTTGTTGGTGATAGATCTGCCTGTATGCTTCGTGTTGCATTGAATGGTGCTTAGATCTGTGGGATTGGTGATGGGATAGTCGGATTTGTCCATGTATTTGATACTTTCCCGGGTTGATTGCCATGGATTTGCGGGATATGGCATTA
CCTTTC-CTGTGCTGACTGCGGGGGGATGGGGATCTGGGTGGGGGTTCGCTACGATTCTCTGCTTGATGTGG---CGGGCGGTTGAGATCGGAACTTGTTGGTGATAGATCTGCCTGTATGCTTCGTGTTGCATTGAATGGTGCTTAGATCTGTGGGATTGGTGATGGGATAGTCGGATTTGTCCATGTATTTGATACTTTCCCGGGTTGATTGCCATGGATTTGCGGGATATGGCATTA	16	28	Deletion	0.02	-4	PFLC*	PFSVLTAGGWGSGWGFATILCLMWRRAVEIGTCW*	CCTTTC-CTGTGCTGACTGCGGGGGGATGGGGATCTGGGTGGGGGTTCGCTACGATTCTCTGCTTGATGTGG---CGGGCGGTTGAGATCGGAACTTGTTGGTGATAGATCTGCCTGTATGCTTCGTGTTGCATTGAATGGTGCTTAGATCTGTGGGATTGGTGATGGGATAGTCGGATTTGTCCATGTATTTGATACTTTCCCGGGTTGATTGCCATGGATTTGCGGGATATGGCATTA	CCTTTCTCTGTGCTGACTGCGGGGGGATGGGGATCTGGGTGGGGGTTCGCTACGATTCTCTGCTTGATGTGGAGACGGGCGGTTGAGATCGGAACTTGTTGGTGATAGATCTGCCTGTATGCTTCGTGTTGCATTGAATGGTGCTTAGATCTGTGGGATTGGTGATGGGATAGTCGGATTTGTCCATGTATTTGATACTTTCCCGGGTTGATTGCCATGGATTTGCGGGATATGGCATTA
CCTTTCT-TGTGCTGACTGCGGGGGGATGGGGATCTGGGTGGGGGTTCGCTACGATTCTCTGCTTGATGTGGAGACTgGGCGGTTGAGATCGGAACTTGTTGGTGATAGATCTGCCTGTATGCTTCGTGTTGCATTGAATGGTGCTTAGATCTGTGGGATTGGTGATGGGATAGTCGGATTTGTCCATGTATTTGATACTTTCCCGGGTTGATTGCCATGGATTTGCGGGATATGGCATTA	16	34	Insertion and Deletion	0.02	0	PFLC*	PFSVLTAGGWGSGWGFATILCLMWRRAVEIGTCW*	CCTTTCT-TGTGCTGACTGCGGGGGGATGGGGATCTGGGTGGGGGTTCGCTACGATTCTCTGCTTGATGTGGAGACTGGGCGGTTGAGATCGGAACTTGTTGGTGATAGATCTGCCTGTATGCTTCGTGTTGCATTGAATGGTGCTTAGATCTGTGGGATTGGTGATGGGATAGTCGGATTTGTCCATGTATTTGATACTTTCCCGGGTTGATTGCCATGGATTTGCGGGATATGGCATTA	CCTTTCTCTGTGCTGACTGCGGGGGGATGGGGATCTGGGTGGGGGTTCGCTACGATTCTCTGCTTGATGTGGAGACGGGCGGTTGAGATCGGAACTTGTTGGTGATAGATCTGCCTGTATGCTTCGTGTTGCATTGAATGGTGCTTAGATCTGTGGGATTGGTGATGGGATAGTCGGATTTGTCCATGTATTTGATACTTTCCCGGGTTGATTGCCATGGATTTGCGGGATATGGCATTA
CCTTTCTCTGTGCTGACTGCGGGGGGATGGGGATCTGGGT------------------------------------GGGCGGTTGAGATCGGAACTTGTTGGTGATAGATCTGCCTGTATGCTTCGTGTTGCATTGAATGGTGCTTAGATCTGTGGGATTGGTGATGGGATAGTCGGATTTGTCCATGTATTTGATACTTTCCCGGGTTGATTGCCATGGATTTGCGGGATATGGCATTA	16	34	Deletion	0.02	-36	PFSVLTAGGWGSGWAVEIGTCW*	PFSVLTAGGWGSGWGFATILCLMWRRAVEIGTCW*	CCTTTCTCTGTGCTGACTGCGGGGGGATGGGGATCTGGGT------------------------------------GGGCGGTTGAGATCGGAACTTGTTGGTGATAGATCTGCCTGTATGCTTCGTGTTGCATTGAATGGTGCTTAGATCTGTGGGATTGGTGATGGGATAGTCGGATTTGTCCATGTATTTGATACTTTCCCGGGTTGATTGCCATGGATTTGCGGGATATGGCATTA	CCTTTCTCTGTGCTGACTGCGGGGGGATGGGGATCTGGGTGGGGGTTCGCTACGATTCTCTGCTTGATGTGGAGACGGGCGGTTGAGATCGGAACTTGTTGGTGATAGATCTGCCTGTATGCTTCGTGTTGCATTGAATGGTGCTTAGATCTGTGGGATTGGTGATGGGATAGTCGGATTTGTCCATGTATTTGATACTTTCCCGGGTTGATTGCCATGGATTTGCGGGATATGGCATTA
CCTTTCTCTGTGCTGACTGCGGGGGGATGGGGATCTGGGTGGGGGCTCGCTACGATTCTCTGCTTGATGTGG---CGGGCGGTTGAGATCGGAACTTGTTGGTGATAGATCTGCCTGTATGCTTCGTGTTGCATTGAATGGTGCTTAGATCTGTGGGATTGGTGATGGGATAGTCGGATTTGTCCATGTATTTGATACTTTCCCGGGTTGATTGCCATGGATTTGCGGGATATGGCATTA	16	29	Deletion	0.02	-3	PFSVLTAGGWGSGWGLATILCLMWRAVEIGTCW*	PFSVLTAGGWGSGWGFATILCLMWRRAVEIGTCW*	CCTTTCTCTGTGCTGACTGCGGGGGGATGGGGATCTGGGTGGGGGCTCGCTACGATTCTCTGCTTGATGTGG---CGGGCGGTTGAGATCGGAACTTGTTGGTGATAGATCTGCCTGTATGCTTCGTGTTGCATTGAATGGTGCTTAGATCTGTGGGATTGGTGATGGGATAGTCGGATTTGTCCATGTATTTGATACTTTCCCGGGTTGATTGCCATGGATTTGCGGGATATGGCATTA	CCTTTCTCTGTGCTGACTGCGGGGGGATGGGGATCTGGGTGGGGGTTCGCTACGATTCTCTGCTTGATGTGGAGACGGGCGGTTGAGATCGGAACTTGTTGGTGATAGATCTGCCTGTATGCTTCGTGTTGCATTGAATGGTGCTTAGATCTGTGGGATTGGTGATGGGATAGTCGGATTTGTCCATGTATTTGATACTTTCCCGGGTTGATTGCCATGGATTTGCGGGATATGGCATTA
CCTTTCTCTGTGCTGACTGCGGGGGGATGGGGATCTGGGTGGGGGTTCGCTACGATTCTCTGCTTGATGCGGAGACcGGGCGGTTGAGATCGGAACTTGTTGGTGATAGATCTGCCTGTATGCTTCGTGTTGCATTGAATGGTGCTTAGATCTGTGGGATTGGTGATGGGATAGTCGGATTTGTCCATGTATTTGATACTTTCCCGGGTTGATTGCCATGGATTTGCGGGATATGGCATTA	16	32	Insertion	0.02	1	PFSVLTAGGWGSGWGFATILCLMRRPGG*	PFSVLTAGGWGSGWGFATILCLMWRRAVEIGTCW*	CCTTTCTCTGTGCTGACTGCGGGGGGATGGGGATCTGGGTGGGGGTTCGCTACGATTCTCTGCTTGATGCGGAGACCGGGCGGTTGAGATCGGAACTTGTTGGTGATAGATCTGCCTGTATGCTTCGTGTTGCATTGAATGGTGCTTAGATCTGTGGGATTGGTGATGGGATAGTCGGATTTGTCCATGTATTTGATACTTTCCCGGGTTGATTGCCATGGATTTGCGGGATATGGCATTA	CCTTTCTCTGTGCTGACTGCGGGGGGATGGGGATCTGGGTGGGGGTTCGCTACGATTCTCTGCTTGATGTGGAGACGGGCGGTTGAGATCGGAACTTGTTGGTGATAGATCTGCCTGTATGCTTCGTGTTGCATTGAATGGTGCTTAGATCTGTGGGATTGGTGATGGGATAGTCGGATTTGTCCATGTATTTGATACTTTCCCGGGTTGATTGCCATGGATTTGCGGGATATGGCATTA
CCTTTCTCTGTGCTGACTGCGGGGGGATGGGGATCTGGGTGGGGGTTCGCTACGATTCTCTGCTTGATGTGG---CGGGCGGTTGAGATCGGAACTTGTTGGTGATAGATCTGCCTGTATGCTTCGTGTTGCATTGAATGGTGCTTAGATCTGTGGGATTGGTGATGGGATAGTCGGATTTGTCCATGTATTTGATGCTTTCCCGGGTTGATTGCCATGGATTTGCGGGATATGGCATTA	16	31	Deletion	0.02	-3	PFSVLTAGGWGSGWGFATILCLMWRAVEIGTCW*	PFSVLTAGGWGSGWGFATILCLMWRRAVEIGTCW*	CCTTTCTCTGTGCTGACTGCGGGGGGATGGGGATCTGGGTGGGGGTTCGCTACGATTCTCTGCTTGATGTGG---CGGGCGGTTGAGATCGGAACTTGTTGGTGATAGATCTGCCTGTATGCTTCGTGTTGCATTGAATGGTGCTTAGATCTGTGGGATTGGTGATGGGATAGTCGGATTTGTCCATGTATTTGATGCTTTCCCGGGTTGATTGCCATGGATTTGCGGGATATGGCATTA	CCTTTCTCTGTGCTGACTGCGGGGGGATGGGGATCTGGGTGGGGGTTCGCTACGATTCTCTGCTTGATGTGGAGACGGGCGGTTGAGATCGGAACTTGTTGGTGATAGATCTGCCTGTATGCTTCGTGTTGCATTGAATGGTGCTTAGATCTGTGGGATTGGTGATGGGATAGTCGGATTTGTCCATGTATTTGATACTTTCCCGGGTTGATTGCCATGGATTTGCGGGATATGGCATTA
CCTTTCTCTGTGCTGACTGCGGGGGGATGGGGATCTGGGTGGGGGTTCGCTACGATTCTCTGCTTGATGTGGAG--GGGCGGTTGAGATCGGAACTTGTTGGTGATAGATCTGCCTGTATGCTTCGTGTTGCATTGAATGGTGCTTAGATCTGTGGGATTGGTGATGGGATAGTCGGATTTGTCCATGTATTTGATACTTTCCCGGGTTGATTGCCATGGATTTGCGGGATATGGCATTA	16	31	Deletion	0.02	-2	PFSVLTAGGWGSGWGFATILCLMWRGG*	PFSVLTAGGWGSGWGFATILCLMWRRAVEIGTCW*	CCTTTCTCTGTGCTGACTGCGGGGGGATGGGGATCTGGGTGGGGGTTCGCTACGATTCTCTGCTTGATGTGGAG--GGGCGGTTGAGATCGGAACTTGTTGGTGATAGATCTGCCTGTATGCTTCGTGTTGCATTGAATGGTGCTTAGATCTGTGGGATTGGTGATGGGATAGTCGGATTTGTCCATGTATTTGATACTTTCCCGGGTTGATTGCCATGGATTTGCGGGATATGGCATTA	CCTTTCTCTGTGCTGACTGCGGGGGGATGGGGATCTGGGTGGGGGTTCGCTACGATTCTCTGCTTGATGTGGAGACGGGCGGTTGAGATCGGAACTTGTTGGTGATAGATCTGCCTGTATGCTTCGTGTTGCATTGAATGGTGCTTAGATCTGTGGGATTGGTGATGGGATAGTCGGATTTGTCCATGTATTTGATACTTTCCCGGGTTGATTGCCATGGATTTGCGGGATATGGCATTA
CCTTTCTCTGTGCTGACTGCGGGGGGATGGGGATCTGGGTGGGGGTTCGCTACGATTCTCTGCTTGATGTGGAGACGGGCGGTTGAGATCGGAACTTGTTGGTGATAGACCTGCCTGTATGCTTCGTGTTGCATTGAATGGTGCTTAGATCTGTGGGATTGGTGATGGGATAGTCGGATTTGTCCATGTATTTGATACTTTCCCGGGTTGATTGCCATGGATTTGCGGGATATGGCATTA	16	32	1 Base Change	0.02	0	PFSVLTAGGWGSGWGFATILCLMWRRAVEIGTCW*	PFSVLTAGGWGSGWGFATILCLMWRRAVEIGTCW*	CCTTTCTCTGTGCTGACTGCGGGGGGATGGGGATCTGGGTGGGGGTTCGCTACGATTCTCTGCTTGATGTGGAGACGGGCGGTTGAGATCGGAACTTGTTGGTGATAGACCTGCCTGTATGCTTCGTGTTGCATTGAATGGTGCTTAGATCTGTGGGATTGGTGATGGGATAGTCGGATTTGTCCATGTATTTGATACTTTCCCGGGTTGATTGCCATGGATTTGCGGGATATGGCATTA	CCTTTCTCTGTGCTGACTGCGGGGGGATGGGGATCTGGGTGGGGGTTCGCTACGATTCTCTGCTTGATGTGGAGACGGGCGGTTGAGATCGGAACTTGTTGGTGATAGATCTGCCTGTATGCTTCGTGTTGCATTGAATGGTGCTTAGATCTGTGGGATTGGTGATGGGATAGTCGGATTTGTCCATGTATTTGATACTTTCCCGGGTTGATTGCCATGGATTTGCGGGATATGGCATTA
CCTTTCTCTGTGCTGACTGCGGGGGGATGGGGATCTGGGTGGGGGTTCGCTACGATTCTCTGCTTGATGTGGAGACGGGCGGTTGAGATCGGAACTTGTTGGTGATAGATCTGCCTGTACGCTTCGTGTTGCATTGAATGGTGCTTAGATCTGTGGGATTGGTGATGGGATAGTCGGATTTGTCCATGTATTTGATACTTTCCCGGGTTGATTGCCATGGATTTGCGGGATATGGCATTA	16	33	1 Base Change	0.02	0	PFSVLTAGGWGSGWGFATILCLMWRRAVEIGTCW*	PFSVLTAGGWGSGWGFATILCLMWRRAVEIGTCW*	CCTTTCTCTGTGCTGACTGCGGGGGGATGGGGATCTGGGTGGGGGTTCGCTACGATTCTCTGCTTGATGTGGAGACGGGCGGTTGAGATCGGAACTTGTTGGTGATAGATCTGCCTGTACGCTTCGTGTTGCATTGAATGGTGCTTAGATCTGTGGGATTGGTGATGGGATAGTCGGATTTGTCCATGTATTTGATACTTTCCCGGGTTGATTGCCATGGATTTGCGGGATATGGCATTA	CCTTTCTCTGTGCTGACTGCGGGGGGATGGGGATCTGGGTGGGGGTTCGCTACGATTCTCTGCTTGATGTGGAGACGGGCGGTTGAGATCGGAACTTGTTGGTGATAGATCTGCCTGTATGCTTCGTGTTGCATTGAATGGTGCTTAGATCTGTGGGATTGGTGATGGGATAGTCGGATTTGTCCATGTATTTGATACTTTCCCGGGTTGATTGCCATGGATTTGCGGGATATGGCATTA
CCTTTCTCTGTGCTGACTGCGGGGGGATGGGGATCTGGGTGGGGGTTCGCTACGATTCTCTGCTTGATGTGGAGACGGGCGGTTGAGATCGGAACTTGTTGGTGATAGATCTGCCTGTATGCTTCGTGTTGCACTGAATGGTGCTTAGATCTGTGGGATTGGTGATGGGATAGTCGGATTTGTCCATGTATTTGATACTTTCCCGGGTTGATTGCCATGGATTTGCGGGATATGGCATTA	16	33	1 Base Change	0.02	0	PFSVLTAGGWGSGWGFATILCLMWRRAVEIGTCW*	PFSVLTAGGWGSGWGFATILCLMWRRAVEIGTCW*	CCTTTCTCTGTGCTGACTGCGGGGGGATGGGGATCTGGGTGGGGGTTCGCTACGATTCTCTGCTTGATGTGGAGACGGGCGGTTGAGATCGGAACTTGTTGGTGATAGATCTGCCTGTATGCTTCGTGTTGCACTGAATGGTGCTTAGATCTGTGGGATTGGTGATGGGATAGTCGGATTTGTCCATGTATTTGATACTTTCCCGGGTTGATTGCCATGGATTTGCGGGATATGGCATTA	CCTTTCTCTGTGCTGACTGCGGGGGGATGGGGATCTGGGTGGGGGTTCGCTACGATTCTCTGCTTGATGTGGAGACGGGCGGTTGAGATCGGAACTTGTTGGTGATAGATCTGCCTGTATGCTTCGTGTTGCATTGAATGGTGCTTAGATCTGTGGGATTGGTGATGGGATAGTCGGATTTGTCCATGTATTTGATACTTTCCCGGGTTGATTGCCATGGATTTGCGGGATATGGCATTA
CCTTTCTCTGTGCTGACTGCGGGGGGATGGGGATCTGGGTGGGGGTTCGCTACGATTCTCTGCTTGATGTGGAGACGGGCGGTTGAGATCGGAACTTGTTGGTGATAGATCTGCCTGTATGCTTCGTGTTGCATTGAATGGCGCTTAGATCTGTGGGATTGGTGATGGGATAGTCGGATTTGTCCATGTATTTGATACTTTCCCGGGTTGATTGCCATGGATTTGCGGGATATGGCATTA	16	32	1 Base Change	0.02	0	PFSVLTAGGWGSGWGFATILCLMWRRAVEIGTCW*	PFSVLTAGGWGSGWGFATILCLMWRRAVEIGTCW*	CCTTTCTCTGTGCTGACTGCGGGGGGATGGGGATCTGGGTGGGGGTTCGCTACGATTCTCTGCTTGATGTGGAGACGGGCGGTTGAGATCGGAACTTGTTGGTGATAGATCTGCCTGTATGCTTCGTGTTGCATTGAATGGCGCTTAGATCTGTGGGATTGGTGATGGGATAGTCGGATTTGTCCATGTATTTGATACTTTCCCGGGTTGATTGCCATGGATTTGCGGGATATGGCATTA	CCTTTCTCTGTGCTGACTGCGGGGGGATGGGGATCTGGGTGGGGGTTCGCTACGATTCTCTGCTTGATGTGGAGACGGGCGGTTGAGATCGGAACTTGTTGGTGATAGATCTGCCTGTATGCTTCGTGTTGCATTGAATGGTGCTTAGATCTGTGGGATTGGTGATGGGATAGTCGGATTTGTCCATGTATTTGATACTTTCCCGGGTTGATTGCCATGGATTTGCGGGATATGGCATTA
CCTTTCTCTGTGCTGACTGCGGGGGGATGGGGATCTGGGTGGGGGTTCGCTACGATTCTCTGCTTGATGTGGAGACGGGCGGTTGAGATCGGAACTTGTTGGTGATAGATCTGCCTGTATGCTTCGTGTTGCATTGAATGGTGCTTAGATCCGTGGGATTGGTGATGGGATAGTCGGATTTGTCCATGTATTTGATACTTTCCCGGGTTGATTGCCATGGATTTGCGGGATATGGCATTA	16	33	1 Base Change	0.02	0	PFSVLTAGGWGSGWGFATILCLMWRRAVEIGTCW*	PFSVLTAGGWGSGWGFATILCLMWRRAVEIGTCW*	CCTTTCTCTGTGCTGACTGCGGGGGGATGGGGATCTGGGTGGGGGTTCGCTACGATTCTCTGCTTGATGTGGAGACGGGCGGTTGAGATCGGAACTTGTTGGTGATAGATCTGCCTGTATGCTTCGTGTTGCATTGAATGGTGCTTAGATCCGTGGGATTGGTGATGGGATAGTCGGATTTGTCCATGTATTTGATACTTTCCCGGGTTGATTGCCATGGATTTGCGGGATATGGCATTA	CCTTTCTCTGTGCTGACTGCGGGGGGATGGGGATCTGGGTGGGGGTTCGCTACGATTCTCTGCTTGATGTGGAGACGGGCGGTTGAGATCGGAACTTGTTGGTGATAGATCTGCCTGTATGCTTCGTGTTGCATTGAATGGTGCTTAGATCTGTGGGATTGGTGATGGGATAGTCGGATTTGTCCATGTATTTGATACTTTCCCGGGTTGATTGCCATGGATTTGCGGGATATGGCATTA
CCTTTCTCTGTGCTGACTGCGGGGGGATGGGGATCTGGGTGGGGGTTCGCTACGATTCTCTGCTTGATGTGGAGACGGGCGGTTGAGATCGGAACTTGTTGGTGATAGATCTGCCTGTATGCTTCGTGTTGCATTGAATGGTGCTTAGATCTGTGGGACTGGTGATGGGATAGTCGGATTTGTCCATGTATTTGATACTTTCCCGGGTTGATTGCCATGGATTTGCGGGATATGGCATTA	16	33	1 Base Change	0.02	0	PFSVLTAGGWGSGWGFATILCLMWRRAVEIGTCW*	PFSVLTAGGWGSGWGFATILCLMWRRAVEIGTCW*	CCTTTCTCTGTGCTGACTGCGGGGGGATGGGGATCTGGGTGGGGGTTCGCTACGATTCTCTGCTTGATGTGGAGACGGGCGGTTGAGATCGGAACTTGTTGGTGATAGATCTGCCTGTATGCTTCGTGTTGCATTGAATGGTGCTTAGATCTGTGGGACTGGTGATGGGATAGTCGGATTTGTCCATGTATTTGATACTTTCCCGGGTTGATTGCCATGGATTTGCGGGATATGGCATTA	CCTTTCTCTGTGCTGACTGCGGGGGGATGGGGATCTGGGTGGGGGTTCGCTACGATTCTCTGCTTGATGTGGAGACGGGCGGTTGAGATCGGAACTTGTTGGTGATAGATCTGCCTGTATGCTTCGTGTTGCATTGAATGGTGCTTAGATCTGTGGGATTGGTGATGGGATAGTCGGATTTGTCCATGTATTTGATACTTTCCCGGGTTGATTGCCATGGATTTGCGGGATATGGCATTA
CCTTTCTCTGTGCTGACTGCGGGGGGATGGGGATCTGGGTGGGGGTTCGCTACGATTCTCTGCTTGATGTGGAGACGGGCGGTTGAGATCGGAACTTGTTGGTGATAGATCTGCCTGTATGCTTCGTGTTGCATTGAATGGTGCTTAGATCTGTGGGATTGGTGATGGGATAGTCAGATTTGTCCATGTATTTGATACTTTCCCGGGTTGATTGCCATGGATTTGCGGGATATGGCATTA	16	33	1 Base Change	0.02	0	PFSVLTAGGWGSGWGFATILCLMWRRAVEIGTCW*	PFSVLTAGGWGSGWGFATILCLMWRRAVEIGTCW*	CCTTTCTCTGTGCTGACTGCGGGGGGATGGGGATCTGGGTGGGGGTTCGCTACGATTCTCTGCTTGATGTGGAGACGGGCGGTTGAGATCGGAACTTGTTGGTGATAGATCTGCCTGTATGCTTCGTGTTGCATTGAATGGTGCTTAGATCTGTGGGATTGGTGATGGGATAGTCAGATTTGTCCATGTATTTGATACTTTCCCGGGTTGATTGCCATGGATTTGCGGGATATGGCATTA	CCTTTCTCTGTGCTGACTGCGGGGGGATGGGGATCTGGGTGGGGGTTCGCTACGATTCTCTGCTTGATGTGGAGACGGGCGGTTGAGATCGGAACTTGTTGGTGATAGATCTGCCTGTATGCTTCGTGTTGCATTGAATGGTGCTTAGATCTGTGGGATTGGTGATGGGATAGTCGGATTTGTCCATGTATTTGATACTTTCCCGGGTTGATTGCCATGGATTTGCGGGATATGGCATTA
CCTTTCTCTGTGCTGACTGCGGGGGGATGGGGATCTGGGTGGGGGTTCGCTACGATTCTCTGCTTGATGTGGAGACGGGCGGTTGAGATCGGAACTTGTTGGTGATAGATCTGCCTGTATGCTTCGTGTTGCATTGAATGGTGCTTAGATCTGTGGGATTGGTGATGGGATAGTCGGATTCGTCCATGTATTTGATACTTTCCCGGGTTGATTGCCATGGATTTGCGGGATATGGCATTA	16	32	1 Base Change	0.02	0	PFSVLTAGGWGSGWGFATILCLMWRRAVEIGTCW*	PFSVLTAGGWGSGWGFATILCLMWRRAVEIGTCW*	CCTTTCTCTGTGCTGACTGCGGGGGGATGGGGATCTGGGTGGGGGTTCGCTACGATTCTCTGCTTGATGTGGAGACGGGCGGTTGAGATCGGAACTTGTTGGTGATAGATCTGCCTGTATGCTTCGTGTTGCATTGAATGGTGCTTAGATCTGTGGGATTGGTGATGGGATAGTCGGATTCGTCCATGTATTTGATACTTTCCCGGGTTGATTGCCATGGATTTGCGGGATATGGCATTA	CCTTTCTCTGTGCTGACTGCGGGGGGATGGGGATCTGGGTGGGGGTTCGCTACGATTCTCTGCTTGATGTGGAGACGGGCGGTTGAGATCGGAACTTGTTGGTGATAGATCTGCCTGTATGCTTCGTGTTGCATTGAATGGTGCTTAGATCTGTGGGATTGGTGATGGGATAGTCGGATTTGTCCATGTATTTGATACTTTCCCGGGTTGATTGCCATGGATTTGCGGGATATGGCATTA
CCTTTCTCTGTGCTGACTGCGGGGGGATGGGGATCTGGGTGGGGGTTCGCTACGATTCTCTGCTTGATGTGGAGACGGGCGGTTGAGATCGGAACTTGTTGGTGATAGATCTGCCTGTATGCTTCGTGTTGCATTGAATGGTGCTTAGATCTGTGGGATTGGTGATGGGATAGTCGGATTTGTCCATGTATTTGATACTTTCCCGGGTCGATTGCCATGGATTTGCGGGATATGGCATTA	16	33	1 Base Change	0.02	0	PFSVLTAGGWGSGWGFATILCLMWRRAVEIGTCW*	PFSVLTAGGWGSGWGFATILCLMWRRAVEIGTCW*	CCTTTCTCTGTGCTGACTGCGGGGGGATGGGGATCTGGGTGGGGGTTCGCTACGATTCTCTGCTTGATGTGGAGACGGGCGGTTGAGATCGGAACTTGTTGGTGATAGATCTGCCTGTATGCTTCGTGTTGCATTGAATGGTGCTTAGATCTGTGGGATTGGTGATGGGATAGTCGGATTTGTCCATGTATTTGATACTTTCCCGGGTCGATTGCCATGGATTTGCGGGATATGGCATTA	CCTTTCTCTGTGCTGACTGCGGGGGGATGGGGATCTGGGTGGGGGTTCGCTACGATTCTCTGCTTGATGTGGAGACGGGCGGTTGAGATCGGAACTTGTTGGTGATAGATCTGCCTGTATGCTTCGTGTTGCATTGAATGGTGCTTAGATCTGTGGGATTGGTGATGGGATAGTCGGATTTGTCCATGTATTTGATACTTTCCCGGGTTGATTGCCATGGATTTGCGGGATATGGCATTA
CCTTTCTCTGTGCTGACTGCGGGGGGATGGGGATCTGGGTGGGGGTTCGCTACGATTCTCTGCTTGATGTGGAGACGGGCGGTTGAGATCGGAACTTGTTGGTGATAGATCTGCCTGTATGCTTCGTGTTGCATTGGATGGTGCTTAGATCTGTGGGATTGGTGATGGGATAGTCGGATTTGTCCATGTATTTGATACTTTCCCGGGTTGATTGCCATGGATTTGCGGGATATGGCATTA	16	32	1 Base Change	0.02	0	PFSVLTAGGWGSGWGFATILCLMWRRAVEIGTCW*	PFSVLTAGGWGSGWGFATILCLMWRRAVEIGTCW*	CCTTTCTCTGTGCTGACTGCGGGGGGATGGGGATCTGGGTGGGGGTTCGCTACGATTCTCTGCTTGATGTGGAGACGGGCGGTTGAGATCGGAACTTGTTGGTGATAGATCTGCCTGTATGCTTCGTGTTGCATTGGATGGTGCTTAGATCTGTGGGATTGGTGATGGGATAGTCGGATTTGTCCATGTATTTGATACTTTCCCGGGTTGATTGCCATGGATTTGCGGGATATGGCATTA	CCTTTCTCTGTGCTGACTGCGGGGGGATGGGGATCTGGGTGGGGGTTCGCTACGATTCTCTGCTTGATGTGGAGACGGGCGGTTGAGATCGGAACTTGTTGGTGATAGATCTGCCTGTATGCTTCGTGTTGCATTGAATGGTGCTTAGATCTGTGGGATTGGTGATGGGATAGTCGGATTTGTCCATGTATTTGATACTTTCCCGGGTTGATTGCCATGGATTTGCGGGATATGGCATTA
CCTTTCTCTGTGCTGACTGCGGGGGGATGGGGATCTGGGTGGGGGTTCGCTACGATTCTCTGCTTGATGTGGAGACGGGCGGTTGAGATCGGAACTTGTTGGTGATGGATCTGCCTGTATGCTTCGTGTTGCATTGAATGGTGCTTAGATCTGTGGGATTGGTGATGGGATAGTCGGATTTGTCCATGTATTTGATACTTTCCCGGGTTGATTGCCATGGATTTGCGGGATATGGCATTA	16	34	1 Base Change	0.02	0	PFSVLTAGGWGSGWGFATILCLMWRRAVEIGTCW*	PFSVLTAGGWGSGWGFATILCLMWRRAVEIGTCW*	CCTTTCTCTGTGCTGACTGCGGGGGGATGGGGATCTGGGTGGGGGTTCGCTACGATTCTCTGCTTGATGTGGAGACGGGCGGTTGAGATCGGAACTTGTTGGTGATGGATCTGCCTGTATGCTTCGTGTTGCATTGAATGGTGCTTAGATCTGTGGGATTGGTGATGGGATAGTCGGATTTGTCCATGTATTTGATACTTTCCCGGGTTGATTGCCATGGATTTGCGGGATATGGCATTA	CCTTTCTCTGTGCTGACTGCGGGGGGATGGGGATCTGGGTGGGGGTTCGCTACGATTCTCTGCTTGATGTGGAGACGGGCGGTTGAGATCGGAACTTGTTGGTGATAGATCTGCCTGTATGCTTCGTGTTGCATTGAATGGTGCTTAGATCTGTGGGATTGGTGATGGGATAGTCGGATTTGTCCATGTATTTGATACTTTCCCGGGTTGATTGCCATGGATTTGCGGGATATGGCATTA
CCTTTCTCTGTGCTGACTGCGGGGGGATGGGGATCTGGGTGGGGGTTCGCTACGATTCTCTGCTTGATGTGGAGACGGGCGGTTGAGATCGGAACTTGTTGGTGGTAGATCTGCCTGTATGCTTCGTGTTGCATTGAATGGTGCTTAGATCTGTGGGATTGGTGATGGGATAGTCGGATTTGTCCATGTATTTGATACTTTCCCGGGTTGATTGCCATGGATTTGCGGGATATGGCATTA	16	33	1 Base Change	0.02	0	PFSVLTAGGWGSGWGFATILCLMWRRAVEIGTCWW*	PFSVLTAGGWGSGWGFATILCLMWRRAVEIGTCW*	CCTTTCTCTGTGCTGACTGCGGGGGGATGGGGATCTGGGTGGGGGTTCGCTACGATTCTCTGCTTGATGTGGAGACGGGCGGTTGAGATCGGAACTTGTTGGTGGTAGATCTGCCTGTATGCTTCGTGTTGCATTGAATGGTGCTTAGATCTGTGGGATTGGTGATGGGATAGTCGGATTTGTCCATGTATTTGATACTTTCCCGGGTTGATTGCCATGGATTTGCGGGATATGGCATTA	CCTTTCTCTGTGCTGACTGCGGGGGGATGGGGATCTGGGTGGGGGTTCGCTACGATTCTCTGCTTGATGTGGAGACGGGCGGTTGAGATCGGAACTTGTTGGTGATAGATCTGCCTGTATGCTTCGTGTTGCATTGAATGGTGCTTAGATCTGTGGGATTGGTGATGGGATAGTCGGATTTGTCCATGTATTTGATACTTTCCCGGGTTGATTGCCATGGATTTGCGGGATATGGCATTA
CCTTTCTCTGTGCTGACTGCGGGGGGATGGGGATCTGGGTGGGGGTTCGCTACGATTCTCTGCTTGATGTGGAGACTgGGCGGCTGAGATCGGAACTTGTTGGTGATAGATCTGCCTGTATGCTTCGTGTTGCATTGAATGGTGCTTAGATCTGTGGGATTGGTGATGGGATAGTCGGATTTGTCCATGTATTTGATACTTTCCCGGGTTGATTGCCATGGATTTGCGGGATATGGCATTA	16	33	Insertion	0.02	1	PFSVLTAGGWGSGWGFATILCLMWRLGG*	PFSVLTAGGWGSGWGFATILCLMWRRAVEIGTCW*	CCTTTCTCTGTGCTGACTGCGGGGGGATGGGGATCTGGGTGGGGGTTCGCTACGATTCTCTGCTTGATGTGGAGACTGGGCGGCTGAGATCGGAACTTGTTGGTGATAGATCTGCCTGTATGCTTCGTGTTGCATTGAATGGTGCTTAGATCTGTGGGATTGGTGATGGGATAGTCGGATTTGTCCATGTATTTGATACTTTCCCGGGTTGATTGCCATGGATTTGCGGGATATGGCATTA	CCTTTCTCTGTGCTGACTGCGGGGGGATGGGGATCTGGGTGGGGGTTCGCTACGATTCTCTGCTTGATGTGGAGACGGGCGGTTGAGATCGGAACTTGTTGGTGATAGATCTGCCTGTATGCTTCGTGTTGCATTGAATGGTGCTTAGATCTGTGGGATTGGTGATGGGATAGTCGGATTTGTCCATGTATTTGATACTTTCCCGGGTTGATTGCCATGGATTTGCGGGATATGGCATTA
CCTTTCTCTGTGCTGACTGCGGGGGGATGGGGATCTGGGTGGGGGTTCGCTACGATTCTCTGCTTGATGTGGAGACTgGGCGGTTGAGATCGGAACTTGTTGGTGATAGATCTGCCTGTATGCTTCGTGTTGCATTGAATGGTGCTTAGACCTGTGGGATTGGTGATGGGATAGTCGGATTTGTCCATGTATTTGATACTTTCCCGGGTTGATTGCCATGGATTTGCGGGATATGGCATTA	16	33	Insertion	0.02	1	PFSVLTAGGWGSGWGFATILCLMWRLGG*	PFSVLTAGGWGSGWGFATILCLMWRRAVEIGTCW*	CCTTTCTCTGTGCTGACTGCGGGGGGATGGGGATCTGGGTGGGGGTTCGCTACGATTCTCTGCTTGATGTGGAGACTGGGCGGTTGAGATCGGAACTTGTTGGTGATAGATCTGCCTGTATGCTTCGTGTTGCATTGAATGGTGCTTAGACCTGTGGGATTGGTGATGGGATAGTCGGATTTGTCCATGTATTTGATACTTTCCCGGGTTGATTGCCATGGATTTGCGGGATATGGCATTA	CCTTTCTCTGTGCTGACTGCGGGGGGATGGGGATCTGGGTGGGGGTTCGCTACGATTCTCTGCTTGATGTGGAGACGGGCGGTTGAGATCGGAACTTGTTGGTGATAGATCTGCCTGTATGCTTCGTGTTGCATTGAATGGTGCTTAGATCTGTGGGATTGGTGATGGGATAGTCGGATTTGTCCATGTATTTGATACTTTCCCGGGTTGATTGCCATGGATTTGCGGGATATGGCATTA
CCTTTCTCTGTGCTGACTGCGGGGGGATGGGGATCTGGGTGGGGGTTCGCTACGATTCTCTGCTTGATGTGGAGACTgGGCGGTTGAGATCGGAACTTGTTGGTGATAGATCTGCCTGTATGCTTCGTGTTGCATTGAATGGTGCTTAGATCTGTGGGGTTGGTGATGGGATAGTCGGATTTGTCCATGTATTTGATACTTTCCCGGGTTGATTGCCATGGATTTGCGGGATATGGCATTA	16	33	Insertion	0.02	1	PFSVLTAGGWGSGWGFATILCLMWRLGG*	PFSVLTAGGWGSGWGFATILCLMWRRAVEIGTCW*	CCTTTCTCTGTGCTGACTGCGGGGGGATGGGGATCTGGGTGGGGGTTCGCTACGATTCTCTGCTTGATGTGGAGACTGGGCGGTTGAGATCGGAACTTGTTGGTGATAGATCTGCCTGTATGCTTCGTGTTGCATTGAATGGTGCTTAGATCTGTGGGGTTGGTGATGGGATAGTCGGATTTGTCCATGTATTTGATACTTTCCCGGGTTGATTGCCATGGATTTGCGGGATATGGCATTA	CCTTTCTCTGTGCTGACTGCGGGGGGATGGGGATCTGGGTGGGGGTTCGCTACGATTCTCTGCTTGATGTGGAGACGGGCGGTTGAGATCGGAACTTGTTGGTGATAGATCTGCCTGTATGCTTCGTGTTGCATTGAATGGTGCTTAGATCTGTGGGATTGGTGATGGGATAGTCGGATTTGTCCATGTATTTGATACTTTCCCGGGTTGATTGCCATGGATTTGCGGGATATGGCATTA
CCTTTCTCTGTGCTGACTGCGGGGGGATGGGGATCTGGGTGGGGGTTCGCTACGATTCTCTGCTTGATGTGGAGACTgGGCGGTTGAGATCGGAACTTGTTGGTGATAGATCTGCCTGTATGCTTCGTGTTGCATTGAATGGTGCTTAGGTCTGTGGGATTGGTGATGGGATAGTCGGATTTGTCCATGTATTTGATACTTTCCCGGGTTGATTGCCATGGATTTGCGGGATATGGCATTA	16	33	Insertion	0.02	1	PFSVLTAGGWGSGWGFATILCLMWRLGG*	PFSVLTAGGWGSGWGFATILCLMWRRAVEIGTCW*	CCTTTCTCTGTGCTGACTGCGGGGGGATGGGGATCTGGGTGGGGGTTCGCTACGATTCTCTGCTTGATGTGGAGACTGGGCGGTTGAGATCGGAACTTGTTGGTGATAGATCTGCCTGTATGCTTCGTGTTGCATTGAATGGTGCTTAGGTCTGTGGGATTGGTGATGGGATAGTCGGATTTGTCCATGTATTTGATACTTTCCCGGGTTGATTGCCATGGATTTGCGGGATATGGCATTA	CCTTTCTCTGTGCTGACTGCGGGGGGATGGGGATCTGGGTGGGGGTTCGCTACGATTCTCTGCTTGATGTGGAGACGGGCGGTTGAGATCGGAACTTGTTGGTGATAGATCTGCCTGTATGCTTCGTGTTGCATTGAATGGTGCTTAGATCTGTGGGATTGGTGATGGGATAGTCGGATTTGTCCATGTATTTGATACTTTCCCGGGTTGATTGCCATGGATTTGCGGGATATGGCATTA
CCTTTCTCTGTGCTGACTGCGGGGGGATGGGGATCTGGGTGGGGGTTCGCTACGATTCTCTGCTTGATGTGGAGACTgGGCGGTTGAGATCGGAACTTGTTGGTGGTAGATCTGCCTGTATGCTTCGTGTTGCATTGAATGGTGCTTAGATCTGTGGGATTGGTGATGGGATAGTCGGATTTGTCCATGTATTTGATACTTTCCCGGGTTGATTGCCATGGATTTGCGGGATATGGCATTA	16	33	Insertion	0.02	1	PFSVLTAGGWGSGWGFATILCLMWRLGG*	PFSVLTAGGWGSGWGFATILCLMWRRAVEIGTCW*	CCTTTCTCTGTGCTGACTGCGGGGGGATGGGGATCTGGGTGGGGGTTCGCTACGATTCTCTGCTTGATGTGGAGACTGGGCGGTTGAGATCGGAACTTGTTGGTGGTAGATCTGCCTGTATGCTTCGTGTTGCATTGAATGGTGCTTAGATCTGTGGGATTGGTGATGGGATAGTCGGATTTGTCCATGTATTTGATACTTTCCCGGGTTGATTGCCATGGATTTGCGGGATATGGCATTA	CCTTTCTCTGTGCTGACTGCGGGGGGATGGGGATCTGGGTGGGGGTTCGCTACGATTCTCTGCTTGATGTGGAGACGGGCGGTTGAGATCGGAACTTGTTGGTGATAGATCTGCCTGTATGCTTCGTGTTGCATTGAATGGTGCTTAGATCTGTGGGATTGGTGATGGGATAGTCGGATTTGTCCATGTATTTGATACTTTCCCGGGTTGATTGCCATGGATTTGCGGGATATGGCATTA
CCTTTCTCTGTGCTGACTGCGGGGGGATGGGGATCTGGGTGGGGGTTCGCTACGATTTTCTGCTTGATGTGGA---GGGCGGTTGAGATCGGAACTTGTTGGTGATAGATCTGCCTGTATGCTTCGTGTTGCATTGAATGGTGCTTAGATCTGTGGGATTGGTGATGGGATAGTCGGATTTGTCCATGTATTTGATACTTTCCCGGGTTGATTGCCATGGATTTGCGGGATATGGCATTA	16	33	Deletion	0.02	-3	PFSVLTAGGWGSGWGFATIFCLMWRAVEIGTCW*	PFSVLTAGGWGSGWGFATILCLMWRRAVEIGTCW*	CCTTTCTCTGTGCTGACTGCGGGGGGATGGGGATCTGGGTGGGGGTTCGCTACGATTTTCTGCTTGATGTGGA---GGGCGGTTGAGATCGGAACTTGTTGGTGATAGATCTGCCTGTATGCTTCGTGTTGCATTGAATGGTGCTTAGATCTGTGGGATTGGTGATGGGATAGTCGGATTTGTCCATGTATTTGATACTTTCCCGGGTTGATTGCCATGGATTTGCGGGATATGGCATTA	CCTTTCTCTGTGCTGACTGCGGGGGGATGGGGATCTGGGTGGGGGTTCGCTACGATTCTCTGCTTGATGTGGAGACGGGCGGTTGAGATCGGAACTTGTTGGTGATAGATCTGCCTGTATGCTTCGTGTTGCATTGAATGGTGCTTAGATCTGTGGGATTGGTGATGGGATAGTCGGATTTGTCCATGTATTTGATACTTTCCCGGGTTGATTGCCATGGATTTGCGGGATATGGCATTA
CCTTTCTCTGTGCTGACTGCGGGGGGGTGGGGATCTGGGTGGGGGTTCGCTACGATTCTCTGCTTGATGTGGAGACGGGCGGTTGAGATCGGAACTTGTTGGTGATAGATCTGCCTGTATGCTTCGTGTTGCATTGAATGGTGCTTAGATCTGTGGGATTGGTGATGGGATAGTCGGATTTGTCCATGTATTTGATACTTTCCCGGGTTGATTGCCATGGATTTGCGGGATATGGCATTA	16	32	1 Base Change	0.02	0	PFSVLTAGGWGSGWGFATILCLMWRRAVEIGTCW*	PFSVLTAGGWGSGWGFATILCLMWRRAVEIGTCW*	CCTTTCTCTGTGCTGACTGCGGGGGGGTGGGGATCTGGGTGGGGGTTCGCTACGATTCTCTGCTTGATGTGGAGACGGGCGGTTGAGATCGGAACTTGTTGGTGATAGATCTGCCTGTATGCTTCGTGTTGCATTGAATGGTGCTTAGATCTGTGGGATTGGTGATGGGATAGTCGGATTTGTCCATGTATTTGATACTTTCCCGGGTTGATTGCCATGGATTTGCGGGATATGGCATTA	CCTTTCTCTGTGCTGACTGCGGGGGGATGGGGATCTGGGTGGGGGTTCGCTACGATTCTCTGCTTGATGTGGAGACGGGCGGTTGAGATCGGAACTTGTTGGTGATAGATCTGCCTGTATGCTTCGTGTTGCATTGAATGGTGCTTAGATCTGTGGGATTGGTGATGGGATAGTCGGATTTGTCCATGTATTTGATACTTTCCCGGGTTGATTGCCATGGATTTGCGGGATATGGCATTA
CCTTTCT-TGTGCTGACTGCGGGGGGATGGGGATCTGGGTGGGGGTTCGCTACGATTCTCTGCTTGATGTGGAGACGGGCGGTTGAGATCGGAACTTGTTGGTGATAGATCTGCCTGTATGCTTCGTGTTGCATTGAATGGTGCTTAGATCTGTGGGATTGGTGATGGGATAGTCGGATTTGTCCATGTATTTGATACTTTCCCGGGTTGATTGCCATGGATTTGCGGGATATGGCATTA	15	33	Deletion	0.02	-1	PFLC*	PFSVLTAGGWGSGWGFATILCLMWRRAVEIGTCW*	CCTTTCT-TGTGCTGACTGCGGGGGGATGGGGATCTGGGTGGGGGTTCGCTACGATTCTCTGCTTGATGTGGAGACGGGCGGTTGAGATCGGAACTTGTTGGTGATAGATCTGCCTGTATGCTTCGTGTTGCATTGAATGGTGCTTAGATCTGTGGGATTGGTGATGGGATAGTCGGATTTGTCCATGTATTTGATACTTTCCCGGGTTGATTGCCATGGATTTGCGGGATATGGCATTA	CCTTTCTCTGTGCTGACTGCGGGGGGATGGGGATCTGGGTGGGGGTTCGCTACGATTCTCTGCTTGATGTGGAGACGGGCGGTTGAGATCGGAACTTGTTGGTGATAGATCTGCCTGTATGCTTCGTGTTGCATTGAATGGTGCTTAGATCTGTGGGATTGGTGATGGGATAGTCGGATTTGTCCATGTATTTGATACTTTCCCGGGTTGATTGCCATGGATTTGCGGGATATGGCATTA
CCTTTCTCTGTGCTGACTGCGGGGGGATGGGGATCTGGGTGGGGGTTCGCTACGATTCCCTGCTTGATGTGGAGACcGGGCGGTTGAGATCGGAACTTGTTGGTGATAGATCTGCCTGTATGCTTCGTGTTGCATTGAATGGTGCTTAGATCTGTGGGATTGGTGATGGGATAGTCGGATTTGTCCATGTATTTGATACTTTCCCGGGTTGATTGCCATGGATTTGCGGGATATGGCATTA	15	33	Insertion	0.02	1	PFSVLTAGGWGSGWGFATIPCLMWRPGG*	PFSVLTAGGWGSGWGFATILCLMWRRAVEIGTCW*	CCTTTCTCTGTGCTGACTGCGGGGGGATGGGGATCTGGGTGGGGGTTCGCTACGATTCCCTGCTTGATGTGGAGACCGGGCGGTTGAGATCGGAACTTGTTGGTGATAGATCTGCCTGTATGCTTCGTGTTGCATTGAATGGTGCTTAGATCTGTGGGATTGGTGATGGGATAGTCGGATTTGTCCATGTATTTGATACTTTCCCGGGTTGATTGCCATGGATTTGCGGGATATGGCATTA	CCTTTCTCTGTGCTGACTGCGGGGGGATGGGGATCTGGGTGGGGGTTCGCTACGATTCTCTGCTTGATGTGGAGACGGGCGGTTGAGATCGGAACTTGTTGGTGATAGATCTGCCTGTATGCTTCGTGTTGCATTGAATGGTGCTTAGATCTGTGGGATTGGTGATGGGATAGTCGGATTTGTCCATGTATTTGATACTTTCCCGGGTTGATTGCCATGGATTTGCGGGATATGGCATTA
CCTTTCTCTGTGCTGACTGCGGGGGGATGGGGATCTGGGTGGGGGTTCGCTACGATTCTCTGCTTGATGT------GGGCGGTTGAGATCGGAACTTGTTGGTGATAGATCTGCCTGTATGCTTCGTGTTGCATTGAATGGTGCTTAGATCTGTGGGATTGGTGATGGGATAGTCGGATTTGTCCATGTATTTGATACTTTCCCGGGTTGATTGCCATGGATTTGCGGGATATGGCATTA	15	32	Deletion	0.02	-6	PFSVLTAGGWGSGWGFATILCLMWAVEIGTCW*	PFSVLTAGGWGSGWGFATILCLMWRRAVEIGTCW*	CCTTTCTCTGTGCTGACTGCGGGGGGATGGGGATCTGGGTGGGGGTTCGCTACGATTCTCTGCTTGATGT------GGGCGGTTGAGATCGGAACTTGTTGGTGATAGATCTGCCTGTATGCTTCGTGTTGCATTGAATGGTGCTTAGATCTGTGGGATTGGTGATGGGATAGTCGGATTTGTCCATGTATTTGATACTTTCCCGGGTTGATTGCCATGGATTTGCGGGATATGGCATTA	CCTTTCTCTGTGCTGACTGCGGGGGGATGGGGATCTGGGTGGGGGTTCGCTACGATTCTCTGCTTGATGTGGAGACGGGCGGTTGAGATCGGAACTTGTTGGTGATAGATCTGCCTGTATGCTTCGTGTTGCATTGAATGGTGCTTAGATCTGTGGGATTGGTGATGGGATAGTCGGATTTGTCCATGTATTTGATACTTTCCCGGGTTGATTGCCATGGATTTGCGGGATATGGCATTA
CCTTTCTCTGTGCTGACTGCGGGGGGATGGGGATCTGGGTGGGGGTTCGCTACGATTCTCTGCTTGATGTGG---CGGGCGGTTGAGATCGGAACTTGTTGGTGATAGATCTGCCTGTATGCTTCGTGTTGCATTGAATGGTGCTTAGATCTGTGGGATTGGTGATGGGATAGTCGGATTTGCCCATGTATTTGATACTTTCCCGGGTTGATTGCCATGGATTTGCGGGATATGGCATTA	15	29	Deletion	0.02	-3	PFSVLTAGGWGSGWGFATILCLMWRAVEIGTCW*	PFSVLTAGGWGSGWGFATILCLMWRRAVEIGTCW*	CCTTTCTCTGTGCTGACTGCGGGGGGATGGGGATCTGGGTGGGGGTTCGCTACGATTCTCTGCTTGATGTGG---CGGGCGGTTGAGATCGGAACTTGTTGGTGATAGATCTGCCTGTATGCTTCGTGTTGCATTGAATGGTGCTTAGATCTGTGGGATTGGTGATGGGATAGTCGGATTTGCCCATGTATTTGATACTTTCCCGGGTTGATTGCCATGGATTTGCGGGATATGGCATTA	CCTTTCTCTGTGCTGACTGCGGGGGGATGGGGATCTGGGTGGGGGTTCGCTACGATTCTCTGCTTGATGTGGAGACGGGCGGTTGAGATCGGAACTTGTTGGTGATAGATCTGCCTGTATGCTTCGTGTTGCATTGAATGGTGCTTAGATCTGTGGGATTGGTGATGGGATAGTCGGATTTGTCCATGTATTTGATACTTTCCCGGGTTGATTGCCATGGATTTGCGGGATATGGCATTA
CCTTTCTCTGTGCTGACTGCGGGGGGATGGGGATCTGGGTGGGGGTTCGCTACGATTCTCTGCTTGATGTGGAGACcGGGCGGTTGAGATCGGAACTTGTTGGTGATAGATCTGCCTGTATGCTTCGTGTTGCATTGAATGGTGCTTAGATCTGTGGGATTGGTGATGGGATAGTCGGATTTGTCCATGTATTTGATACCTTCCCGGGTTGATTGCCATGGATTTGCGGGATATGGCATTA	15	32	Insertion	0.02	1	PFSVLTAGGWGSGWGFATILCLMWRPGG*	PFSVLTAGGWGSGWGFATILCLMWRRAVEIGTCW*	CCTTTCTCTGTGCTGACTGCGGGGGGATGGGGATCTGGGTGGGGGTTCGCTACGATTCTCTGCTTGATGTGGAGACCGGGCGGTTGAGATCGGAACTTGTTGGTGATAGATCTGCCTGTATGCTTCGTGTTGCATTGAATGGTGCTTAGATCTGTGGGATTGGTGATGGGATAGTCGGATTTGTCCATGTATTTGATACCTTCCCGGGTTGATTGCCATGGATTTGCGGGATATGGCATTA	CCTTTCTCTGTGCTGACTGCGGGGGGATGGGGATCTGGGTGGGGGTTCGCTACGATTCTCTGCTTGATGTGGAGACGGGCGGTTGAGATCGGAACTTGTTGGTGATAGATCTGCCTGTATGCTTCGTGTTGCATTGAATGGTGCTTAGATCTGTGGGATTGGTGATGGGATAGTCGGATTTGTCCATGTATTTGATACTTTCCCGGGTTGATTGCCATGGATTTGCGGGATATGGCATTA
CCTTTCTCTGTGCTGACTGCGGGGGGATGGGGATCTGGGTGGGGGTTCGCTACGATTCTCTGCTTGATGTGGAGACcGGGCGGTTGAGATCGGAACTTGTTGGTGATAGATCTGCCTGTATGCTTCGTGTTGCATTGAATGGTGCTTAGATCTGTGGGATTGGTGATGGGATAGTCGGATTTGTCCATGTATTTGATACTTTCCCGGGTTGATTGCCATGGATTTGCGGGAT-TGGCATTA	15	33	Insertion and Deletion	0.02	0	PFSVLTAGGWGSGWGFATILCLMWRPGG*	PFSVLTAGGWGSGWGFATILCLMWRRAVEIGTCW*	CCTTTCTCTGTGCTGACTGCGGGGGGATGGGGATCTGGGTGGGGGTTCGCTACGATTCTCTGCTTGATGTGGAGACCGGGCGGTTGAGATCGGAACTTGTTGGTGATAGATCTGCCTGTATGCTTCGTGTTGCATTGAATGGTGCTTAGATCTGTGGGATTGGTGATGGGATAGTCGGATTTGTCCATGTATTTGATACTTTCCCGGGTTGATTGCCATGGATTTGCGGGAT-TGGCATTA	CCTTTCTCTGTGCTGACTGCGGGGGGATGGGGATCTGGGTGGGGGTTCGCTACGATTCTCTGCTTGATGTGGAGACGGGCGGTTGAGATCGGAACTTGTTGGTGATAGATCTGCCTGTATGCTTCGTGTTGCATTGAATGGTGCTTAGATCTGTGGGATTGGTGATGGGATAGTCGGATTTGTCCATGTATTTGATACTTTCCCGGGTTGATTGCCATGGATTTGCGGGATATGGCATTA
CCTTTCTCTGTGCTGACTGCGGGGGGATGGGGATCTGGGTGGGGGTTCGCTACGATTCTCTGCTTGATGTGGAGACGGGCGGTTGAGATCGGAACTTGCTGGTGATAGATCTGCCTGTATGCTTCGTGTTGCATTGAATGGTGCTTAGATCTGTGGGATTGGTGATGGGATAGTCGGATTTGTCCATGTATTTGATACTTTCCCGGGTTGATTGCCATGGATTTGCGGGATATGGCATTA	15	33	1 Base Change	0.02	0	PFSVLTAGGWGSGWGFATILCLMWRRAVEIGTCW*	PFSVLTAGGWGSGWGFATILCLMWRRAVEIGTCW*	CCTTTCTCTGTGCTGACTGCGGGGGGATGGGGATCTGGGTGGGGGTTCGCTACGATTCTCTGCTTGATGTGGAGACGGGCGGTTGAGATCGGAACTTGCTGGTGATAGATCTGCCTGTATGCTTCGTGTTGCATTGAATGGTGCTTAGATCTGTGGGATTGGTGATGGGATAGTCGGATTTGTCCATGTATTTGATACTTTCCCGGGTTGATTGCCATGGATTTGCGGGATATGGCATTA	CCTTTCTCTGTGCTGACTGCGGGGGGATGGGGATCTGGGTGGGGGTTCGCTACGATTCTCTGCTTGATGTGGAGACGGGCGGTTGAGATCGGAACTTGTTGGTGATAGATCTGCCTGTATGCTTCGTGTTGCATTGAATGGTGCTTAGATCTGTGGGATTGGTGATGGGATAGTCGGATTTGTCCATGTATTTGATACTTTCCCGGGTTGATTGCCATGGATTTGCGGGATATGGCATTA
CCTTTCTCTGTGCTGACTGCGGGGGGATGGGGATCTGGGTGGGGGTTCGCTACGATTCTCTGCTTGATGTGGAGACGGGCGGTTGAGATCGGAACTTGTTGGTGATAGATCTGCCTGTATGCTTCGTGTTGCATTGAATGGTGCTTAGATCTGTGGGATTGGTGATGGGATAGTCGGATCTGTCCATGTATTTGATACTTTCCCGGGTTGATTGCCATGGATTTGCGGGATATGGCATTA	15	33	1 Base Change	0.02	0	PFSVLTAGGWGSGWGFATILCLMWRRAVEIGTCW*	PFSVLTAGGWGSGWGFATILCLMWRRAVEIGTCW*	CCTTTCTCTGTGCTGACTGCGGGGGGATGGGGATCTGGGTGGGGGTTCGCTACGATTCTCTGCTTGATGTGGAGACGGGCGGTTGAGATCGGAACTTGTTGGTGATAGATCTGCCTGTATGCTTCGTGTTGCATTGAATGGTGCTTAGATCTGTGGGATTGGTGATGGGATAGTCGGATCTGTCCATGTATTTGATACTTTCCCGGGTTGATTGCCATGGATTTGCGGGATATGGCATTA	CCTTTCTCTGTGCTGACTGCGGGGGGATGGGGATCTGGGTGGGGGTTCGCTACGATTCTCTGCTTGATGTGGAGACGGGCGGTTGAGATCGGAACTTGTTGGTGATAGATCTGCCTGTATGCTTCGTGTTGCATTGAATGGTGCTTAGATCTGTGGGATTGGTGATGGGATAGTCGGATTTGTCCATGTATTTGATACTTTCCCGGGTTGATTGCCATGGATTTGCGGGATATGGCATTA
CCTTTCTCTGTGCTGACTGCGGGGGGATGGGGATCTGGGTGGGGGTTCGCTACGATTCTCTGCTTGATGTGGAGACGGGCGGTTGAGATCGGAACTTGTTGGTGATAGATCTGCCTGTATGCTTCGTGTTGCATTGAATGGTGCTTAGATCTGTGGGATTGGTGATGGGATAGTCGGATTTGTCCATGTATTCGATACTTTCCCGGGTTGATTGCCATGGATTTGCGGGATATGGCATTA	15	33	1 Base Change	0.02	0	PFSVLTAGGWGSGWGFATILCLMWRRAVEIGTCW*	PFSVLTAGGWGSGWGFATILCLMWRRAVEIGTCW*	CCTTTCTCTGTGCTGACTGCGGGGGGATGGGGATCTGGGTGGGGGTTCGCTACGATTCTCTGCTTGATGTGGAGACGGGCGGTTGAGATCGGAACTTGTTGGTGATAGATCTGCCTGTATGCTTCGTGTTGCATTGAATGGTGCTTAGATCTGTGGGATTGGTGATGGGATAGTCGGATTTGTCCATGTATTCGATACTTTCCCGGGTTGATTGCCATGGATTTGCGGGATATGGCATTA	CCTTTCTCTGTGCTGACTGCGGGGGGATGGGGATCTGGGTGGGGGTTCGCTACGATTCTCTGCTTGATGTGGAGACGGGCGGTTGAGATCGGAACTTGTTGGTGATAGATCTGCCTGTATGCTTCGTGTTGCATTGAATGGTGCTTAGATCTGTGGGATTGGTGATGGGATAGTCGGATTTGTCCATGTATTTGATACTTTCCCGGGTTGATTGCCATGGATTTGCGGGATATGGCATTA
CCTTTCTCTGTGCTGACTGCGGGGGGATGGGGATCTGGGTGGGGGTTCGCTACGATTCTCTGCTTGATGTGGAGACGGGCGGTTGAGATCGGAACTTGTTGGTGATAGATCTGCCTGTATGCTTCGTGTTGCATTGAATGGTGCTTAGATCTGTGGGATTGGTGATGGGATAGTCGGATTTGTCCATGTATTTGGTACTTTCCCGGGTTGATTGCCATGGATTTGCGGGATATGGCATTA	15	33	1 Base Change	0.02	0	PFSVLTAGGWGSGWGFATILCLMWRRAVEIGTCW*	PFSVLTAGGWGSGWGFATILCLMWRRAVEIGTCW*	CCTTTCTCTGTGCTGACTGCGGGGGGATGGGGATCTGGGTGGGGGTTCGCTACGATTCTCTGCTTGATGTGGAGACGGGCGGTTGAGATCGGAACTTGTTGGTGATAGATCTGCCTGTATGCTTCGTGTTGCATTGAATGGTGCTTAGATCTGTGGGATTGGTGATGGGATAGTCGGATTTGTCCATGTATTTGGTACTTTCCCGGGTTGATTGCCATGGATTTGCGGGATATGGCATTA	CCTTTCTCTGTGCTGACTGCGGGGGGATGGGGATCTGGGTGGGGGTTCGCTACGATTCTCTGCTTGATGTGGAGACGGGCGGTTGAGATCGGAACTTGTTGGTGATAGATCTGCCTGTATGCTTCGTGTTGCATTGAATGGTGCTTAGATCTGTGGGATTGGTGATGGGATAGTCGGATTTGTCCATGTATTTGATACTTTCCCGGGTTGATTGCCATGGATTTGCGGGATATGGCATTA
CCTTTCTCTGTGCTGACTGCGGGGGGATGGGGATCTGGGTGGGGGTTCGCTACGATTCTCTGCTTGATGTGGAGACGGGCGGTTGAGATCGGAACTTGTTGGTGATAGATCTGCCTGTATGCTTCGTGTTGCATTGAATGGTGCTTAGATCTGTGGGATTGGTGATGGGATAGTCGGATTTGTCCGTGTATTTGATACTTTCCCGGGTTGATTGCCATGGATTTGCGGGATATGGCATTA	15	32	1 Base Change	0.02	0	PFSVLTAGGWGSGWGFATILCLMWRRAVEIGTCW*	PFSVLTAGGWGSGWGFATILCLMWRRAVEIGTCW*	CCTTTCTCTGTGCTGACTGCGGGGGGATGGGGATCTGGGTGGGGGTTCGCTACGATTCTCTGCTTGATGTGGAGACGGGCGGTTGAGATCGGAACTTGTTGGTGATAGATCTGCCTGTATGCTTCGTGTTGCATTGAATGGTGCTTAGATCTGTGGGATTGGTGATGGGATAGTCGGATTTGTCCGTGTATTTGATACTTTCCCGGGTTGATTGCCATGGATTTGCGGGATATGGCATTA	CCTTTCTCTGTGCTGACTGCGGGGGGATGGGGATCTGGGTGGGGGTTCGCTACGATTCTCTGCTTGATGTGGAGACGGGCGGTTGAGATCGGAACTTGTTGGTGATAGATCTGCCTGTATGCTTCGTGTTGCATTGAATGGTGCTTAGATCTGTGGGATTGGTGATGGGATAGTCGGATTTGTCCATGTATTTGATACTTTCCCGGGTTGATTGCCATGGATTTGCGGGATATGGCATTA
CCTTTCTCTGTGCTGACTGCGGGGGGATGGGGATCTGGGTGGGGGTTCGCTACGATTCTCTGCTTGATGTGGAGACGGGCGGTTGAGATCGGAACTTGTTGGTGATAGATCTGCCTGTATGCTTCGTGTTGCGTTGAATGGTGCTTAGATCTGTGGGATTGGTGATGGGATAGTCGGATTTGTCCATGTATTTGATACTTTCCCGGGTTGATTGCCATGGATTTGCGGGATATGGCATTA	15	33	1 Base Change	0.02	0	PFSVLTAGGWGSGWGFATILCLMWRRAVEIGTCW*	PFSVLTAGGWGSGWGFATILCLMWRRAVEIGTCW*	CCTTTCTCTGTGCTGACTGCGGGGGGATGGGGATCTGGGTGGGGGTTCGCTACGATTCTCTGCTTGATGTGGAGACGGGCGGTTGAGATCGGAACTTGTTGGTGATAGATCTGCCTGTATGCTTCGTGTTGCGTTGAATGGTGCTTAGATCTGTGGGATTGGTGATGGGATAGTCGGATTTGTCCATGTATTTGATACTTTCCCGGGTTGATTGCCATGGATTTGCGGGATATGGCATTA	CCTTTCTCTGTGCTGACTGCGGGGGGATGGGGATCTGGGTGGGGGTTCGCTACGATTCTCTGCTTGATGTGGAGACGGGCGGTTGAGATCGGAACTTGTTGGTGATAGATCTGCCTGTATGCTTCGTGTTGCATTGAATGGTGCTTAGATCTGTGGGATTGGTGATGGGATAGTCGGATTTGTCCATGTATTTGATACTTTCCCGGGTTGATTGCCATGGATTTGCGGGATATGGCATTA
CCTTTCTCTGTGCTGACTGCGGGGGGATGGGGATCTGGGTGGGGGTTCGCTACGATTCTCTGCTTGATGTGGAGACTgGGCGGTTGAGATCGGAACTTGTTGGTGATAGATCTGCCTGTATGCTCCGTGTTGCATTGAATGGTGCTTAGATCTGTGGGATTGGTGATGGGATAGTCGGATTTGTCCATGTATTTGATACTTTCCCGGGTTGATTGCCATGGATTTGCGGGATATGGCATTA	15	33	Insertion	0.02	1	PFSVLTAGGWGSGWGFATILCLMWRLGG*	PFSVLTAGGWGSGWGFATILCLMWRRAVEIGTCW*	CCTTTCTCTGTGCTGACTGCGGGGGGATGGGGATCTGGGTGGGGGTTCGCTACGATTCTCTGCTTGATGTGGAGACTGGGCGGTTGAGATCGGAACTTGTTGGTGATAGATCTGCCTGTATGCTCCGTGTTGCATTGAATGGTGCTTAGATCTGTGGGATTGGTGATGGGATAGTCGGATTTGTCCATGTATTTGATACTTTCCCGGGTTGATTGCCATGGATTTGCGGGATATGGCATTA	CCTTTCTCTGTGCTGACTGCGGGGGGATGGGGATCTGGGTGGGGGTTCGCTACGATTCTCTGCTTGATGTGGAGACGGGCGGTTGAGATCGGAACTTGTTGGTGATAGATCTGCCTGTATGCTTCGTGTTGCATTGAATGGTGCTTAGATCTGTGGGATTGGTGATGGGATAGTCGGATTTGTCCATGTATTTGATACTTTCCCGGGTTGATTGCCATGGATTTGCGGGATATGGCATTA
CCTTTCTCTGTGCTGACTGCGGGGGGATGGGGATCTGGGTGGGGGTTCGCTACGATTCTCTGCTTGATGTGGAGACTgGGCGGTTGAGATCGGAACTTGTTGGTGATAGATCTGCCTGTATGCTTCGTGTTGCATTGAATGGTGCTTAGATCTGTGGGATTGGTGATGGGATAGTCGGATTTGTCCATGTATTTGATACTTCCCCGGGTTGATTGCCATGGATTTGCGGGATATGGCATTA	15	33	Insertion	0.02	1	PFSVLTAGGWGSGWGFATILCLMWRLGG*	PFSVLTAGGWGSGWGFATILCLMWRRAVEIGTCW*	CCTTTCTCTGTGCTGACTGCGGGGGGATGGGGATCTGGGTGGGGGTTCGCTACGATTCTCTGCTTGATGTGGAGACTGGGCGGTTGAGATCGGAACTTGTTGGTGATAGATCTGCCTGTATGCTTCGTGTTGCATTGAATGGTGCTTAGATCTGTGGGATTGGTGATGGGATAGTCGGATTTGTCCATGTATTTGATACTTCCCCGGGTTGATTGCCATGGATTTGCGGGATATGGCATTA	CCTTTCTCTGTGCTGACTGCGGGGGGATGGGGATCTGGGTGGGGGTTCGCTACGATTCTCTGCTTGATGTGGAGACGGGCGGTTGAGATCGGAACTTGTTGGTGATAGATCTGCCTGTATGCTTCGTGTTGCATTGAATGGTGCTTAGATCTGTGGGATTGGTGATGGGATAGTCGGATTTGTCCATGTATTTGATACTTTCCCGGGTTGATTGCCATGGATTTGCGGGATATGGCATTA
CCTTTCTCTGTGCTGACTGCGGGGGGATGGGGATCTGGGTGGGGGTTCGCTACGATTCTCTGCTTGATGTGGAGACTgGGCGGTTGAGATCGGAACTTGTTGGTGATAGATCTGCCTGTATGCTTCGTGTTGCATTGAATGGTGCTTAGATCTGTGGGATTGGTGATGGGATAGTCGGATTTGTCCATGTATTTGATACTTTCCCGGGCTGATTGCCATGGATTTGCGGGATATGGCATTA	15	33	Insertion	0.02	1	PFSVLTAGGWGSGWGFATILCLMWRLGG*	PFSVLTAGGWGSGWGFATILCLMWRRAVEIGTCW*	CCTTTCTCTGTGCTGACTGCGGGGGGATGGGGATCTGGGTGGGGGTTCGCTACGATTCTCTGCTTGATGTGGAGACTGGGCGGTTGAGATCGGAACTTGTTGGTGATAGATCTGCCTGTATGCTTCGTGTTGCATTGAATGGTGCTTAGATCTGTGGGATTGGTGATGGGATAGTCGGATTTGTCCATGTATTTGATACTTTCCCGGGCTGATTGCCATGGATTTGCGGGATATGGCATTA	CCTTTCTCTGTGCTGACTGCGGGGGGATGGGGATCTGGGTGGGGGTTCGCTACGATTCTCTGCTTGATGTGGAGACGGGCGGTTGAGATCGGAACTTGTTGGTGATAGATCTGCCTGTATGCTTCGTGTTGCATTGAATGGTGCTTAGATCTGTGGGATTGGTGATGGGATAGTCGGATTTGTCCATGTATTTGATACTTTCCCGGGTTGATTGCCATGGATTTGCGGGATATGGCATTA
CCTTTCTCTGTGCTGACTGCGGGGGGATGGGGATCTGGGTGGGGGTTCGCTACGATTCTCTGCTTGATGTGGAGACTgGGCGGTTGAGATCGGAACTTGTTGGTGATAGATCTGCCTGTATGCTTCGTGTTGCATTGAATGGTGCTTAGATCTGTGGGATTGGTGATGGGATAGTCGGGTTTGTCCATGTATTTGATACTTTCCCGGGTTGATTGCCATGGATTTGCGGGATATGGCATTA	15	34	Insertion	0.02	1	PFSVLTAGGWGSGWGFATILCLMWRLGG*	PFSVLTAGGWGSGWGFATILCLMWRRAVEIGTCW*	CCTTTCTCTGTGCTGACTGCGGGGGGATGGGGATCTGGGTGGGGGTTCGCTACGATTCTCTGCTTGATGTGGAGACTGGGCGGTTGAGATCGGAACTTGTTGGTGATAGATCTGCCTGTATGCTTCGTGTTGCATTGAATGGTGCTTAGATCTGTGGGATTGGTGATGGGATAGTCGGGTTTGTCCATGTATTTGATACTTTCCCGGGTTGATTGCCATGGATTTGCGGGATATGGCATTA	CCTTTCTCTGTGCTGACTGCGGGGGGATGGGGATCTGGGTGGGGGTTCGCTACGATTCTCTGCTTGATGTGGAGACGGGCGGTTGAGATCGGAACTTGTTGGTGATAGATCTGCCTGTATGCTTCGTGTTGCATTGAATGGTGCTTAGATCTGTGGGATTGGTGATGGGATAGTCGGATTTGTCCATGTATTTGATACTTTCCCGGGTTGATTGCCATGGATTTGCGGGATATGGCATTA
CCTTTCTCTGTGCTGACTGCGGGGGGATGGGGATCTGGGTGGGGGTTCGCTACGATTCTCTGCTTGATGTGGAGACTgGGCGGTTGAGATCGGGACTTGTTGGTGATAGATCTGCCTGTATGCTTCGTGTTGCATTGAATGGTGCTTAGATCTGTGGGATTGGTGATGGGATAGTCGGATTTGTCCATGTATTTGATACTTTCCCGGGTTGATTGCCATGGATTTGCGGGATATGGCATTA	15	33	Insertion	0.02	1	PFSVLTAGGWGSGWGFATILCLMWRLGG*	PFSVLTAGGWGSGWGFATILCLMWRRAVEIGTCW*	CCTTTCTCTGTGCTGACTGCGGGGGGATGGGGATCTGGGTGGGGGTTCGCTACGATTCTCTGCTTGATGTGGAGACTGGGCGGTTGAGATCGGGACTTGTTGGTGATAGATCTGCCTGTATGCTTCGTGTTGCATTGAATGGTGCTTAGATCTGTGGGATTGGTGATGGGATAGTCGGATTTGTCCATGTATTTGATACTTTCCCGGGTTGATTGCCATGGATTTGCGGGATATGGCATTA	CCTTTCTCTGTGCTGACTGCGGGGGGATGGGGATCTGGGTGGGGGTTCGCTACGATTCTCTGCTTGATGTGGAGACGGGCGGTTGAGATCGGAACTTGTTGGTGATAGATCTGCCTGTATGCTTCGTGTTGCATTGAATGGTGCTTAGATCTGTGGGATTGGTGATGGGATAGTCGGATTTGTCCATGTATTTGATACTTTCCCGGGTTGATTGCCATGGATTTGCGGGATATGGCATTA
CCTTTCTCTGTGCTGACTGCGGGGGGATGGGGATCTGGGTGGGGGTTCGCTACGATTCTCTGCTTGATGTGGAGACTgGGCGGTTGAGGTCGGAACTTGTTGGTGATAGATCTGCCTGTATGCTTCGTGTTGCATTGAATGGTGCTTAGATCTGTGGGATTGGTGATGGGATAGTCGGATTTGTCCATGTATTTGATACTTTCCCGGGTTGATTGCCATGGATTTGCGGGATATGGCATTA	15	34	Insertion	0.02	1	PFSVLTAGGWGSGWGFATILCLMWRLGG*	PFSVLTAGGWGSGWGFATILCLMWRRAVEIGTCW*	CCTTTCTCTGTGCTGACTGCGGGGGGATGGGGATCTGGGTGGGGGTTCGCTACGATTCTCTGCTTGATGTGGAGACTGGGCGGTTGAGGTCGGAACTTGTTGGTGATAGATCTGCCTGTATGCTTCGTGTTGCATTGAATGGTGCTTAGATCTGTGGGATTGGTGATGGGATAGTCGGATTTGTCCATGTATTTGATACTTTCCCGGGTTGATTGCCATGGATTTGCGGGATATGGCATTA	CCTTTCTCTGTGCTGACTGCGGGGGGATGGGGATCTGGGTGGGGGTTCGCTACGATTCTCTGCTTGATGTGGAGACGGGCGGTTGAGATCGGAACTTGTTGGTGATAGATCTGCCTGTATGCTTCGTGTTGCATTGAATGGTGCTTAGATCTGTGGGATTGGTGATGGGATAGTCGGATTTGTCCATGTATTTGATACTTTCCCGGGTTGATTGCCATGGATTTGCGGGATATGGCATTA
CCTTTCTC-GTGCTGACTGCGGGGGGATGGGGATCTGGGTGGGGGTTCGCTACGATTCTCTGCTTGATGTGGAGACcGGGCGGTTGAGATCGGAACTTGTTGGTGATAGATCTGCCTGTATGCTTCGTGTTGCATTGAATGGTGCTTAGATCTGTGGGATTGGTGATGGGATAGTCGGATTTGTCCATGTATTTGATACTTTCCCGGGTTGATTGCCATGGATTTGCGGGATATGGCATTA	14	33	Insertion and Deletion	0.02	0	PFSC*	PFSVLTAGGWGSGWGFATILCLMWRRAVEIGTCW*	CCTTTCTC-GTGCTGACTGCGGGGGGATGGGGATCTGGGTGGGGGTTCGCTACGATTCTCTGCTTGATGTGGAGACCGGGCGGTTGAGATCGGAACTTGTTGGTGATAGATCTGCCTGTATGCTTCGTGTTGCATTGAATGGTGCTTAGATCTGTGGGATTGGTGATGGGATAGTCGGATTTGTCCATGTATTTGATACTTTCCCGGGTTGATTGCCATGGATTTGCGGGATATGGCATTA	CCTTTCTCTGTGCTGACTGCGGGGGGATGGGGATCTGGGTGGGGGTTCGCTACGATTCTCTGCTTGATGTGGAGACGGGCGGTTGAGATCGGAACTTGTTGGTGATAGATCTGCCTGTATGCTTCGTGTTGCATTGAATGGTGCTTAGATCTGTGGGATTGGTGATGGGATAGTCGGATTTGTCCATGTATTTGATACTTTCCCGGGTTGATTGCCATGGATTTGCGGGATATGGCATTA
CCTTTCTCTGTGCTGACTGC-GGGGGATGGGGATCTGGGTGGGGGTTCGCTACGATTCTCTGCTTGATGTGG---CGGGCGGTTGAGATCGGAACTTGTTGGTGATAGATCTGCCTGTATGCTTCGTGTTGCATTGAATGGTGCTTAGATCTGTGGGATTGGTGATGGGATAGTCGGATTTGTCCATGTATTTGATACTTTCCCGGGTTGATTGCCATGGATTTGCGGGATATGGCATTA	14	31	Deletion	0.02	-4	PFSVLTAGDGDLGGGSLRFSA*	PFSVLTAGGWGSGWGFATILCLMWRRAVEIGTCW*	CCTTTCTCTGTGCTGACTGC-GGGGGATGGGGATCTGGGTGGGGGTTCGCTACGATTCTCTGCTTGATGTGG---CGGGCGGTTGAGATCGGAACTTGTTGGTGATAGATCTGCCTGTATGCTTCGTGTTGCATTGAATGGTGCTTAGATCTGTGGGATTGGTGATGGGATAGTCGGATTTGTCCATGTATTTGATACTTTCCCGGGTTGATTGCCATGGATTTGCGGGATATGGCATTA	CCTTTCTCTGTGCTGACTGCGGGGGGATGGGGATCTGGGTGGGGGTTCGCTACGATTCTCTGCTTGATGTGGAGACGGGCGGTTGAGATCGGAACTTGTTGGTGATAGATCTGCCTGTATGCTTCGTGTTGCATTGAATGGTGCTTAGATCTGTGGGATTGGTGATGGGATAGTCGGATTTGTCCATGTATTTGATACTTTCCCGGGTTGATTGCCATGGATTTGCGGGATATGGCATTA
CCTTTCTCTGTGCTGACTGCGGGGGGATGGGGATCTGGGT-GGGGTTCGCTACGATTCTCTGCTTGATGTGGAGACGGGCGGTTGAGATCGGAACTTGTTGGTGATAGATCTGCCTGTATGCTTCGTGTTGCATTGAATGGTGCTTAGATCTGTGGGATTGGTGATGGGATAGTCGGATTTGTCCATGTATTTGATACTTTCCCGGGTTGATTGCCATGGATTTGCGGGATATGGCATTA	14	34	Deletion	0.02	-1	PFSVLTAGGWGSGWGSLRFSA*	PFSVLTAGGWGSGWGFATILCLMWRRAVEIGTCW*	CCTTTCTCTGTGCTGACTGCGGGGGGATGGGGATCTGGGT-GGGGTTCGCTACGATTCTCTGCTTGATGTGGAGACGGGCGGTTGAGATCGGAACTTGTTGGTGATAGATCTGCCTGTATGCTTCGTGTTGCATTGAATGGTGCTTAGATCTGTGGGATTGGTGATGGGATAGTCGGATTTGTCCATGTATTTGATACTTTCCCGGGTTGATTGCCATGGATTTGCGGGATATGGCATTA	CCTTTCTCTGTGCTGACTGCGGGGGGATGGGGATCTGGGTGGGGGTTCGCTACGATTCTCTGCTTGATGTGGAGACGGGCGGTTGAGATCGGAACTTGTTGGTGATAGATCTGCCTGTATGCTTCGTGTTGCATTGAATGGTGCTTAGATCTGTGGGATTGGTGATGGGATAGTCGGATTTGTCCATGTATTTGATACTTTCCCGGGTTGATTGCCATGGATTTGCGGGATATGGCATTA
CCTTTCTCTGTGCTGACTGCGGGGGGATGGGGATCTGGGTGGGGGTTCGCTACGATTCTCTGCTTGATGTGG---CGGGCGGTTGAGATCGGAACTTGTTGGTGATAGATCTGCCTGTATGCTTCGTGTCGCATTGAATGGTGCTTAGATCTGTGGGATTGGTGATGGGATAGTCGGATTTGTCCATGTATTTGATACTTTCCCGGGTTGATTGCCATGGATTTGCGGGATATGGCATTA	14	29	Deletion	0.02	-3	PFSVLTAGGWGSGWGFATILCLMWRAVEIGTCW*	PFSVLTAGGWGSGWGFATILCLMWRRAVEIGTCW*	CCTTTCTCTGTGCTGACTGCGGGGGGATGGGGATCTGGGTGGGGGTTCGCTACGATTCTCTGCTTGATGTGG---CGGGCGGTTGAGATCGGAACTTGTTGGTGATAGATCTGCCTGTATGCTTCGTGTCGCATTGAATGGTGCTTAGATCTGTGGGATTGGTGATGGGATAGTCGGATTTGTCCATGTATTTGATACTTTCCCGGGTTGATTGCCATGGATTTGCGGGATATGGCATTA	CCTTTCTCTGTGCTGACTGCGGGGGGATGGGGATCTGGGTGGGGGTTCGCTACGATTCTCTGCTTGATGTGGAGACGGGCGGTTGAGATCGGAACTTGTTGGTGATAGATCTGCCTGTATGCTTCGTGTTGCATTGAATGGTGCTTAGATCTGTGGGATTGGTGATGGGATAGTCGGATTTGTCCATGTATTTGATACTTTCCCGGGTTGATTGCCATGGATTTGCGGGATATGGCATTA
CCTTTCTCTGTGCTGACTGCGGGGGGATGGGGATCTGGGTGGGGGTTCGCTACGATTCTCTGCTTGATGTGG---CGGGCGGTTGAGATCGGAACTTGTTGGTGATAGATCTGCCTGTATGCTTCGTGTTGCATTGAATGGTGCTTAGATCTGTGGGATTGGTGATGGGATAGTCGGACTTGTCCATGTATTTGATACTTTCCCGGGTTGATTGCCATGGATTTGCGGGATATGGCATTA	14	29	Deletion	0.02	-3	PFSVLTAGGWGSGWGFATILCLMWRAVEIGTCW*	PFSVLTAGGWGSGWGFATILCLMWRRAVEIGTCW*	CCTTTCTCTGTGCTGACTGCGGGGGGATGGGGATCTGGGTGGGGGTTCGCTACGATTCTCTGCTTGATGTGG---CGGGCGGTTGAGATCGGAACTTGTTGGTGATAGATCTGCCTGTATGCTTCGTGTTGCATTGAATGGTGCTTAGATCTGTGGGATTGGTGATGGGATAGTCGGACTTGTCCATGTATTTGATACTTTCCCGGGTTGATTGCCATGGATTTGCGGGATATGGCATTA	CCTTTCTCTGTGCTGACTGCGGGGGGATGGGGATCTGGGTGGGGGTTCGCTACGATTCTCTGCTTGATGTGGAGACGGGCGGTTGAGATCGGAACTTGTTGGTGATAGATCTGCCTGTATGCTTCGTGTTGCATTGAATGGTGCTTAGATCTGTGGGATTGGTGATGGGATAGTCGGATTTGTCCATGTATTTGATACTTTCCCGGGTTGATTGCCATGGATTTGCGGGATATGGCATTA
CCTTTCTCTGTGCTGACTGCGGGGGGATGGGGATCTGGGTGGGGGTTCGCTACGATTCTCTGCTTGATGTGGA---GGGCGGTTGAGATCGGAACTTGTTGGTGATAGATCTGCCTGTATGCTTCGTGTTGCATTGAATGGTGCTTAGATCTGTGGGATTGGTGATGGGATAGTCGGATTTGTCCATGTATTTGATACTTTCCCGGGTTGATTGCCATGGATTTGC-GGATATGGCATTA	14	33	Deletion	0.02	-4	PFSVLTAGGWGSGWGFATILCLMWRAVEIGTCW*	PFSVLTAGGWGSGWGFATILCLMWRRAVEIGTCW*	CCTTTCTCTGTGCTGACTGCGGGGGGATGGGGATCTGGGTGGGGGTTCGCTACGATTCTCTGCTTGATGTGGA---GGGCGGTTGAGATCGGAACTTGTTGGTGATAGATCTGCCTGTATGCTTCGTGTTGCATTGAATGGTGCTTAGATCTGTGGGATTGGTGATGGGATAGTCGGATTTGTCCATGTATTTGATACTTTCCCGGGTTGATTGCCATGGATTTGC-GGATATGGCATTA	CCTTTCTCTGTGCTGACTGCGGGGGGATGGGGATCTGGGTGGGGGTTCGCTACGATTCTCTGCTTGATGTGGAGACGGGCGGTTGAGATCGGAACTTGTTGGTGATAGATCTGCCTGTATGCTTCGTGTTGCATTGAATGGTGCTTAGATCTGTGGGATTGGTGATGGGATAGTCGGATTTGTCCATGTATTTGATACTTTCCCGGGTTGATTGCCATGGATTTGCGGGATATGGCATTA
CCTTTCTCTGTGCTGACTGCGGGGGGATGGGGATCTGGGTGGGGGTTCGCTACGATTCTCTGCTTGATGTGGAGACcGGGCGGTTGAGATCGGAACTTGTTGGTGATAGATCTGCCTGTATGCTTCGTGTTGCATTGAATGGTGCTTAGATCTGTGGGATTGGTGATGGGATAGTCGGATTTGTCCATGTATTTGATACTTTCCCGGGCTGATTGCCATGGATTTGCGGGATATGGCATTA	14	33	Insertion	0.02	1	PFSVLTAGGWGSGWGFATILCLMWRPGG*	PFSVLTAGGWGSGWGFATILCLMWRRAVEIGTCW*	CCTTTCTCTGTGCTGACTGCGGGGGGATGGGGATCTGGGTGGGGGTTCGCTACGATTCTCTGCTTGATGTGGAGACCGGGCGGTTGAGATCGGAACTTGTTGGTGATAGATCTGCCTGTATGCTTCGTGTTGCATTGAATGGTGCTTAGATCTGTGGGATTGGTGATGGGATAGTCGGATTTGTCCATGTATTTGATACTTTCCCGGGCTGATTGCCATGGATTTGCGGGATATGGCATTA	CCTTTCTCTGTGCTGACTGCGGGGGGATGGGGATCTGGGTGGGGGTTCGCTACGATTCTCTGCTTGATGTGGAGACGGGCGGTTGAGATCGGAACTTGTTGGTGATAGATCTGCCTGTATGCTTCGTGTTGCATTGAATGGTGCTTAGATCTGTGGGATTGGTGATGGGATAGTCGGATTTGTCCATGTATTTGATACTTTCCCGGGTTGATTGCCATGGATTTGCGGGATATGGCATTA
CCTTTCTCTGTGCTGACTGCGGGGGGATGGGGATCTGGGTGGGGGTTCGCTACGATTCTCTGCTTGATGTGGAGACcGGGCGGTTGAGATCGGAACTTGTTGGTGATAGATCTGCCTGTATGCTTCGTGTTGCATTGAATGGTGCTTAGATCTGTGGGATTGGTGATGGGATAGTCGGATTTGTCCGTGTATTTGATACTTTCCCGGGTTGATTGCCATGGATTTGCGGGATATGGCATTA	14	33	Insertion	0.02	1	PFSVLTAGGWGSGWGFATILCLMWRPGG*	PFSVLTAGGWGSGWGFATILCLMWRRAVEIGTCW*	CCTTTCTCTGTGCTGACTGCGGGGGGATGGGGATCTGGGTGGGGGTTCGCTACGATTCTCTGCTTGATGTGGAGACCGGGCGGTTGAGATCGGAACTTGTTGGTGATAGATCTGCCTGTATGCTTCGTGTTGCATTGAATGGTGCTTAGATCTGTGGGATTGGTGATGGGATAGTCGGATTTGTCCGTGTATTTGATACTTTCCCGGGTTGATTGCCATGGATTTGCGGGATATGGCATTA	CCTTTCTCTGTGCTGACTGCGGGGGGATGGGGATCTGGGTGGGGGTTCGCTACGATTCTCTGCTTGATGTGGAGACGGGCGGTTGAGATCGGAACTTGTTGGTGATAGATCTGCCTGTATGCTTCGTGTTGCATTGAATGGTGCTTAGATCTGTGGGATTGGTGATGGGATAGTCGGATTTGTCCATGTATTTGATACTTTCCCGGGTTGATTGCCATGGATTTGCGGGATATGGCATTA
CCTTTCTCTGTGCTGACTGCGGGGGGATGGGGATCTGGGTGGGGGTTCGCTACGATTCTCTGCTTGATGTGGAGACGGGCGGTTGAGATCGGAACTTGTTGGTGATAGATCTGCCTGTATGCTTCGTGTTGCATTGAATGGTGCTTAGATCTGTGGGATTGGTGACGGGATAGTCGGATTTGTCCATGTATTTGATACTTTCCCGGGTTGATTGCCATGGATTTGCGGGATATGGCATTA	14	33	1 Base Change	0.02	0	PFSVLTAGGWGSGWGFATILCLMWRRAVEIGTCW*	PFSVLTAGGWGSGWGFATILCLMWRRAVEIGTCW*	CCTTTCTCTGTGCTGACTGCGGGGGGATGGGGATCTGGGTGGGGGTTCGCTACGATTCTCTGCTTGATGTGGAGACGGGCGGTTGAGATCGGAACTTGTTGGTGATAGATCTGCCTGTATGCTTCGTGTTGCATTGAATGGTGCTTAGATCTGTGGGATTGGTGACGGGATAGTCGGATTTGTCCATGTATTTGATACTTTCCCGGGTTGATTGCCATGGATTTGCGGGATATGGCATTA	CCTTTCTCTGTGCTGACTGCGGGGGGATGGGGATCTGGGTGGGGGTTCGCTACGATTCTCTGCTTGATGTGGAGACGGGCGGTTGAGATCGGAACTTGTTGGTGATAGATCTGCCTGTATGCTTCGTGTTGCATTGAATGGTGCTTAGATCTGTGGGATTGGTGATGGGATAGTCGGATTTGTCCATGTATTTGATACTTTCCCGGGTTGATTGCCATGGATTTGCGGGATATGGCATTA
CCTTTCTCTGTGCTGACTGCGGGGGGATGGGGATCTGGGTGGGGGTTCGCTACGATTCTCTGCTTGATGTGGAGACTgGGCGGTTGAGATCGGAACCTGTTGGTGATAGATCTGCCTGTATGCTTCGTGTTGCATTGAATGGTGCTTAGATCTGTGGGATTGGTGATGGGATAGTCGGATTTGTCCATGTATTTGATACTTTCCCGGGTTGATTGCCATGGATTTGCGGGATATGGCATTA	14	33	Insertion	0.02	1	PFSVLTAGGWGSGWGFATILCLMWRLGG*	PFSVLTAGGWGSGWGFATILCLMWRRAVEIGTCW*	CCTTTCTCTGTGCTGACTGCGGGGGGATGGGGATCTGGGTGGGGGTTCGCTACGATTCTCTGCTTGATGTGGAGACTGGGCGGTTGAGATCGGAACCTGTTGGTGATAGATCTGCCTGTATGCTTCGTGTTGCATTGAATGGTGCTTAGATCTGTGGGATTGGTGATGGGATAGTCGGATTTGTCCATGTATTTGATACTTTCCCGGGTTGATTGCCATGGATTTGCGGGATATGGCATTA	CCTTTCTCTGTGCTGACTGCGGGGGGATGGGGATCTGGGTGGGGGTTCGCTACGATTCTCTGCTTGATGTGGAGACGGGCGGTTGAGATCGGAACTTGTTGGTGATAGATCTGCCTGTATGCTTCGTGTTGCATTGAATGGTGCTTAGATCTGTGGGATTGGTGATGGGATAGTCGGATTTGTCCATGTATTTGATACTTTCCCGGGTTGATTGCCATGGATTTGCGGGATATGGCATTA
CCTTTCTCTGTGCTGACTGCGGGGGGATGGGGATCTGGGTGGGGGTTCGCTACGATTCTCTGCTTGATGTGGAGACTgGGCGGTTGAGATCGGAACTTGTTGGTGATAGATCTGCCTGTATGCTTCGTGTTGCACTGAATGGTGCTTAGATCTGTGGGATTGGTGATGGGATAGTCGGATTTGTCCATGTATTTGATACTTTCCCGGGTTGATTGCCATGGATTTGCGGGATATGGCATTA	14	33	Insertion	0.02	1	PFSVLTAGGWGSGWGFATILCLMWRLGG*	PFSVLTAGGWGSGWGFATILCLMWRRAVEIGTCW*	CCTTTCTCTGTGCTGACTGCGGGGGGATGGGGATCTGGGTGGGGGTTCGCTACGATTCTCTGCTTGATGTGGAGACTGGGCGGTTGAGATCGGAACTTGTTGGTGATAGATCTGCCTGTATGCTTCGTGTTGCACTGAATGGTGCTTAGATCTGTGGGATTGGTGATGGGATAGTCGGATTTGTCCATGTATTTGATACTTTCCCGGGTTGATTGCCATGGATTTGCGGGATATGGCATTA	CCTTTCTCTGTGCTGACTGCGGGGGGATGGGGATCTGGGTGGGGGTTCGCTACGATTCTCTGCTTGATGTGGAGACGGGCGGTTGAGATCGGAACTTGTTGGTGATAGATCTGCCTGTATGCTTCGTGTTGCATTGAATGGTGCTTAGATCTGTGGGATTGGTGATGGGATAGTCGGATTTGTCCATGTATTTGATACTTTCCCGGGTTGATTGCCATGGATTTGCGGGATATGGCATTA
CCTTTCTCTGTGCTGACTGCGGGGGGATGGGGATCTGGGTGGGGGTTCGCTACGATTCTCTGCTTGATGTGGAGACTgGGCGGTTGAGATCGGAACTTGTTGGTGATAGATCTGCCTGTATGCTTCGTGTTGCATTGAATGGTGCTTAGATCTGTGGGATTGGTGATGGGATAGTCGGATTTGTCCATGTATTTGATACTTTCCCGGGTTGATTGCCATGGATTTGCGGGATATGGC-TTA	14	33	Insertion and Deletion	0.02	0	PFSVLTAGGWGSGWGFATILCLMWRLGG*	PFSVLTAGGWGSGWGFATILCLMWRRAVEIGTCW*	CCTTTCTCTGTGCTGACTGCGGGGGGATGGGGATCTGGGTGGGGGTTCGCTACGATTCTCTGCTTGATGTGGAGACTGGGCGGTTGAGATCGGAACTTGTTGGTGATAGATCTGCCTGTATGCTTCGTGTTGCATTGAATGGTGCTTAGATCTGTGGGATTGGTGATGGGATAGTCGGATTTGTCCATGTATTTGATACTTTCCCGGGTTGATTGCCATGGATTTGCGGGATATGGC-TTA	CCTTTCTCTGTGCTGACTGCGGGGGGATGGGGATCTGGGTGGGGGTTCGCTACGATTCTCTGCTTGATGTGGAGACGGGCGGTTGAGATCGGAACTTGTTGGTGATAGATCTGCCTGTATGCTTCGTGTTGCATTGAATGGTGCTTAGATCTGTGGGATTGGTGATGGGATAGTCGGATTTGTCCATGTATTTGATACTTTCCCGGGTTGATTGCCATGGATTTGCGGGATATGGCATTA
CCTTTCTCTGTGCTGACTGCGGGGGGATGGGGATCTGGGTGGGGGTTCGCTACGATTCTCTGCTTGATGTGGAGACTgGGCGGTTGAGATCGGAACTTGTTGGTGATAGATCTGCCTGTATGCTTCGTGTTGCATTGAATGGTGCTTAGATCTGTGGGATTGGTGATGGGGTAGTCGGATTTGTCCATGTATTTGATACTTTCCCGGGTTGATTGCCATGGATTTGCGGGATATGGCATTA	14	34	Insertion	0.02	1	PFSVLTAGGWGSGWGFATILCLMWRLGG*	PFSVLTAGGWGSGWGFATILCLMWRRAVEIGTCW*	CCTTTCTCTGTGCTGACTGCGGGGGGATGGGGATCTGGGTGGGGGTTCGCTACGATTCTCTGCTTGATGTGGAGACTGGGCGGTTGAGATCGGAACTTGTTGGTGATAGATCTGCCTGTATGCTTCGTGTTGCATTGAATGGTGCTTAGATCTGTGGGATTGGTGATGGGGTAGTCGGATTTGTCCATGTATTTGATACTTTCCCGGGTTGATTGCCATGGATTTGCGGGATATGGCATTA	CCTTTCTCTGTGCTGACTGCGGGGGGATGGGGATCTGGGTGGGGGTTCGCTACGATTCTCTGCTTGATGTGGAGACGGGCGGTTGAGATCGGAACTTGTTGGTGATAGATCTGCCTGTATGCTTCGTGTTGCATTGAATGGTGCTTAGATCTGTGGGATTGGTGATGGGATAGTCGGATTTGTCCATGTATTTGATACTTTCCCGGGTTGATTGCCATGGATTTGCGGGATATGGCATTA
CCTTTCTCTGTGCTGACTGCGGGGGGGTGGGGATCTGGGTGGGGGTTCGCTACGATTCTCTGCTTGATGTGGAGACTgGGCGGTTGAGATCGGAACTTGTTGGTGATAGATCTGCCTGTATGCTTCGTGTTGCATTGAATGGTGCTTAGATCTGTGGGATTGGTGATGGGATAGTCGGATTTGTCCATGTATTTGATACTTTCCCGGGTTGATTGCCATGGATTTGCGGGATATGGCATTA	14	32	Insertion	0.02	1	PFSVLTAGGWGSGWGFATILCLMWRLGG*	PFSVLTAGGWGSGWGFATILCLMWRRAVEIGTCW*	CCTTTCTCTGTGCTGACTGCGGGGGGGTGGGGATCTGGGTGGGGGTTCGCTACGATTCTCTGCTTGATGTGGAGACTGGGCGGTTGAGATCGGAACTTGTTGGTGATAGATCTGCCTGTATGCTTCGTGTTGCATTGAATGGTGCTTAGATCTGTGGGATTGGTGATGGGATAGTCGGATTTGTCCATGTATTTGATACTTTCCCGGGTTGATTGCCATGGATTTGCGGGATATGGCATTA	CCTTTCTCTGTGCTGACTGCGGGGGGATGGGGATCTGGGTGGGGGTTCGCTACGATTCTCTGCTTGATGTGGAGACGGGCGGTTGAGATCGGAACTTGTTGGTGATAGATCTGCCTGTATGCTTCGTGTTGCATTGAATGGTGCTTAGATCTGTGGGATTGGTGATGGGATAGTCGGATTTGTCCATGTATTTGATACTTTCCCGGGTTGATTGCCATGGATTTGCGGGATATGGCATTA
CCTTTCTC-GTGCTGACTGCGGGGGGATGGGGATCTGGGTGGGGGTTCGCTACGATTCTCTGCTTGATGTGGAGACTgGGCGGTTGAGATCGGAACTTGTTGGTGATAGATCTGCCTGTATGCTTCGTGTTGCATTGAATGGTGCTTAGATCTGTGGGATTGGTGATGGGATAGTCGGATTTGTCCATGTATTTGATACTTTCCCGGGTTGATTGCCATGGATTTGCGGGATATGGCATTA	13	33	Insertion and Deletion	0.02	0	PFSC*	PFSVLTAGGWGSGWGFATILCLMWRRAVEIGTCW*	CCTTTCTC-GTGCTGACTGCGGGGGGATGGGGATCTGGGTGGGGGTTCGCTACGATTCTCTGCTTGATGTGGAGACTGGGCGGTTGAGATCGGAACTTGTTGGTGATAGATCTGCCTGTATGCTTCGTGTTGCATTGAATGGTGCTTAGATCTGTGGGATTGGTGATGGGATAGTCGGATTTGTCCATGTATTTGATACTTTCCCGGGTTGATTGCCATGGATTTGCGGGATATGGCATTA	CCTTTCTCTGTGCTGACTGCGGGGGGATGGGGATCTGGGTGGGGGTTCGCTACGATTCTCTGCTTGATGTGGAGACGGGCGGTTGAGATCGGAACTTGTTGGTGATAGATCTGCCTGTATGCTTCGTGTTGCATTGAATGGTGCTTAGATCTGTGGGATTGGTGATGGGATAGTCGGATTTGTCCATGTATTTGATACTTTCCCGGGTTGATTGCCATGGATTTGCGGGATATGGCATTA
CCTTTCTCTGTGCTGACTGCGGGGGGACGGGGATCTGGGTGGGGGTTCGCTACGATTCTCTGCTTGATGTGGAGACTgGGCGGTTGAGATCGGAACTTGTTGGTGATAGATCTGCCTGTATGCTTCGTGTTGCATTGAATGGTGCTTAGATCTGTGGGATTGGTGATGGGATAGTCGGATTTGTCCATGTATTTGATACTTTCCCGGGTTGATTGCCATGGATTTGCGGGATATGGCATTA	13	33	Insertion	0.02	1	PFSVLTAGGRGSGWGFATILCLMWRLGG*	PFSVLTAGGWGSGWGFATILCLMWRRAVEIGTCW*	CCTTTCTCTGTGCTGACTGCGGGGGGACGGGGATCTGGGTGGGGGTTCGCTACGATTCTCTGCTTGATGTGGAGACTGGGCGGTTGAGATCGGAACTTGTTGGTGATAGATCTGCCTGTATGCTTCGTGTTGCATTGAATGGTGCTTAGATCTGTGGGATTGGTGATGGGATAGTCGGATTTGTCCATGTATTTGATACTTTCCCGGGTTGATTGCCATGGATTTGCGGGATATGGCATTA	CCTTTCTCTGTGCTGACTGCGGGGGGATGGGGATCTGGGTGGGGGTTCGCTACGATTCTCTGCTTGATGTGGAGACGGGCGGTTGAGATCGGAACTTGTTGGTGATAGATCTGCCTGTATGCTTCGTGTTGCATTGAATGGTGCTTAGATCTGTGGGATTGGTGATGGGATAGTCGGATTTGTCCATGTATTTGATACTTTCCCGGGTTGATTGCCATGGATTTGCGGGATATGGCATTA
CCTTTCTCTGTGCTGACTGCGGGGGGATGGGGACCTGGGTGGGGGTTCGCTACGATTCTCTGCTTGATGTGGAGACcGGGCGGTTGAGATCGGAACTTGTTGGTGATAGATCTGCCTGTATGCTTCGTGTTGCATTGAATGGTGCTTAGATCTGTGGGATTGGTGATGGGATAGTCGGATTTGTCCATGTATTTGATACTTTCCCGGGTTGATTGCCATGGATTTGCGGGATATGGCATTA	13	33	Insertion	0.02	1	PFSVLTAGGWGPGWGFATILCLMWRPGG*	PFSVLTAGGWGSGWGFATILCLMWRRAVEIGTCW*	CCTTTCTCTGTGCTGACTGCGGGGGGATGGGGACCTGGGTGGGGGTTCGCTACGATTCTCTGCTTGATGTGGAGACCGGGCGGTTGAGATCGGAACTTGTTGGTGATAGATCTGCCTGTATGCTTCGTGTTGCATTGAATGGTGCTTAGATCTGTGGGATTGGTGATGGGATAGTCGGATTTGTCCATGTATTTGATACTTTCCCGGGTTGATTGCCATGGATTTGCGGGATATGGCATTA	CCTTTCTCTGTGCTGACTGCGGGGGGATGGGGATCTGGGTGGGGGTTCGCTACGATTCTCTGCTTGATGTGGAGACGGGCGGTTGAGATCGGAACTTGTTGGTGATAGATCTGCCTGTATGCTTCGTGTTGCATTGAATGGTGCTTAGATCTGTGGGATTGGTGATGGGATAGTCGGATTTGTCCATGTATTTGATACTTTCCCGGGTTGATTGCCATGGATTTGCGGGATATGGCATTA
CCTTTCTCTGTGCTGACTGCGGGGGGATGGGGATCTGGGCGGGGGTTCGCTACGATTCTCTGCTTGATGTGGAGACcGGGCGGTTGAGATCGGAACTTGTTGGTGATAGATCTGCCTGTATGCTTCGTGTTGCATTGAATGGTGCTTAGATCTGTGGGATTGGTGATGGGATAGTCGGATTTGTCCATGTATTTGATACTTTCCCGGGTTGATTGCCATGGATTTGCGGGATATGGCATTA	13	31	Insertion	0.02	1	PFSVLTAGGWGSGRGFATILCLMWRPGG*	PFSVLTAGGWGSGWGFATILCLMWRRAVEIGTCW*	CCTTTCTCTGTGCTGACTGCGGGGGGATGGGGATCTGGGCGGGGGTTCGCTACGATTCTCTGCTTGATGTGGAGACCGGGCGGTTGAGATCGGAACTTGTTGGTGATAGATCTGCCTGTATGCTTCGTGTTGCATTGAATGGTGCTTAGATCTGTGGGATTGGTGATGGGATAGTCGGATTTGTCCATGTATTTGATACTTTCCCGGGTTGATTGCCATGGATTTGCGGGATATGGCATTA	CCTTTCTCTGTGCTGACTGCGGGGGGATGGGGATCTGGGTGGGGGTTCGCTACGATTCTCTGCTTGATGTGGAGACGGGCGGTTGAGATCGGAACTTGTTGGTGATAGATCTGCCTGTATGCTTCGTGTTGCATTGAATGGTGCTTAGATCTGTGGGATTGGTGATGGGATAGTCGGATTTGTCCATGTATTTGATACTTTCCCGGGTTGATTGCCATGGATTTGCGGGATATGGCATTA
CCTTTCTCTGTGCTGACTGCGGGGGGATGGGGATCTGGGTGGGGGTTCGCTACGACTCTCTGCTTGATGTGG---CGGGCGGTTGAGATCGGAACTTGTTGGTGATAGATCTGCCTGTATGCTTCGTGTTGCATTGAATGGTGCTTAGATCTGTGGGATTGGTGATGGGATAGTCGGATTTGTCCATGTATTTGATACTTTCCCGGGTTGATTGCCATGGATTTGCGGGATATGGCATTA	13	30	Deletion	0.02	-3	PFSVLTAGGWGSGWGFATTLCLMWRAVEIGTCW*	PFSVLTAGGWGSGWGFATILCLMWRRAVEIGTCW*	CCTTTCTCTGTGCTGACTGCGGGGGGATGGGGATCTGGGTGGGGGTTCGCTACGACTCTCTGCTTGATGTGG---CGGGCGGTTGAGATCGGAACTTGTTGGTGATAGATCTGCCTGTATGCTTCGTGTTGCATTGAATGGTGCTTAGATCTGTGGGATTGGTGATGGGATAGTCGGATTTGTCCATGTATTTGATACTTTCCCGGGTTGATTGCCATGGATTTGCGGGATATGGCATTA	CCTTTCTCTGTGCTGACTGCGGGGGGATGGGGATCTGGGTGGGGGTTCGCTACGATTCTCTGCTTGATGTGGAGACGGGCGGTTGAGATCGGAACTTGTTGGTGATAGATCTGCCTGTATGCTTCGTGTTGCATTGAATGGTGCTTAGATCTGTGGGATTGGTGATGGGATAGTCGGATTTGTCCATGTATTTGATACTTTCCCGGGTTGATTGCCATGGATTTGCGGGATATGGCATTA
CCTTTCTCTGTGCTGACTGCGGGGGGATGGGGATCTGGGTGGGGGTTCGCTACGATTCTCCGCTTGATGTGGAGACcGGGCGGTTGAGATCGGAACTTGTTGGTGATAGATCTGCCTGTATGCTTCGTGTTGCATTGAATGGTGCTTAGATCTGTGGGATTGGTGATGGGATAGTCGGATTTGTCCATGTATTTGATACTTTCCCGGGTTGATTGCCATGGATTTGCGGGATATGGCATTA	13	33	Insertion	0.02	1	PFSVLTAGGWGSGWGFATILRLMWRPGG*	PFSVLTAGGWGSGWGFATILCLMWRRAVEIGTCW*	CCTTTCTCTGTGCTGACTGCGGGGGGATGGGGATCTGGGTGGGGGTTCGCTACGATTCTCCGCTTGATGTGGAGACCGGGCGGTTGAGATCGGAACTTGTTGGTGATAGATCTGCCTGTATGCTTCGTGTTGCATTGAATGGTGCTTAGATCTGTGGGATTGGTGATGGGATAGTCGGATTTGTCCATGTATTTGATACTTTCCCGGGTTGATTGCCATGGATTTGCGGGATATGGCATTA	CCTTTCTCTGTGCTGACTGCGGGGGGATGGGGATCTGGGTGGGGGTTCGCTACGATTCTCTGCTTGATGTGGAGACGGGCGGTTGAGATCGGAACTTGTTGGTGATAGATCTGCCTGTATGCTTCGTGTTGCATTGAATGGTGCTTAGATCTGTGGGATTGGTGATGGGATAGTCGGATTTGTCCATGTATTTGATACTTTCCCGGGTTGATTGCCATGGATTTGCGGGATATGGCATTA
CCTTTCTCTGTGCTGACTGCGGGGGGATGGGGATCTGGGTGGGGGTTCGCTACGATTCTCCGCTTGATGTGGAGACTgGGCGGTTGAGATCGGAACTTGTTGGTGATAGATCTGCCTGTATGCTTCGTGTTGCATTGAATGGTGCTTAGATCTGTGGGATTGGTGATGGGATAGTCGGATTTGTCCATGTATTTGATACTTTCCCGGGTTGATTGCCATGGATTTGCGGGATATGGCATTA	13	32	Insertion	0.02	1	PFSVLTAGGWGSGWGFATILRLMWRLGG*	PFSVLTAGGWGSGWGFATILCLMWRRAVEIGTCW*	CCTTTCTCTGTGCTGACTGCGGGGGGATGGGGATCTGGGTGGGGGTTCGCTACGATTCTCCGCTTGATGTGGAGACTGGGCGGTTGAGATCGGAACTTGTTGGTGATAGATCTGCCTGTATGCTTCGTGTTGCATTGAATGGTGCTTAGATCTGTGGGATTGGTGATGGGATAGTCGGATTTGTCCATGTATTTGATACTTTCCCGGGTTGATTGCCATGGATTTGCGGGATATGGCATTA	CCTTTCTCTGTGCTGACTGCGGGGGGATGGGGATCTGGGTGGGGGTTCGCTACGATTCTCTGCTTGATGTGGAGACGGGCGGTTGAGATCGGAACTTGTTGGTGATAGATCTGCCTGTATGCTTCGTGTTGCATTGAATGGTGCTTAGATCTGTGGGATTGGTGATGGGATAGTCGGATTTGTCCATGTATTTGATACTTTCCCGGGTTGATTGCCATGGATTTGCGGGATATGGCATTA
CCTTTCTCTGTGCTGACTGCGGGGGGATGGGGATCTGGGTGGGGGTTCGCTACGATTCTCTGCTCGATGTGGAGACGGGCGGTTGAGATCGGAACTTGTTGGTGATAGATCTGCCTGTATGCTTCGTGTTGCATTGAATGGTGCTTAGATCTGTGGGATTGGTGATGGGATAGTCGGATTTGTCCATGTATTTGATACTTTCCCGGGTTGATTGCCATGGATTTGCGGGATATGGCATTA	13	33	1 Base Change	0.02	0	PFSVLTAGGWGSGWGFATILCSMWRRAVEIGTCW*	PFSVLTAGGWGSGWGFATILCLMWRRAVEIGTCW*	CCTTTCTCTGTGCTGACTGCGGGGGGATGGGGATCTGGGTGGGGGTTCGCTACGATTCTCTGCTCGATGTGGAGACGGGCGGTTGAGATCGGAACTTGTTGGTGATAGATCTGCCTGTATGCTTCGTGTTGCATTGAATGGTGCTTAGATCTGTGGGATTGGTGATGGGATAGTCGGATTTGTCCATGTATTTGATACTTTCCCGGGTTGATTGCCATGGATTTGCGGGATATGGCATTA	CCTTTCTCTGTGCTGACTGCGGGGGGATGGGGATCTGGGTGGGGGTTCGCTACGATTCTCTGCTTGATGTGGAGACGGGCGGTTGAGATCGGAACTTGTTGGTGATAGATCTGCCTGTATGCTTCGTGTTGCATTGAATGGTGCTTAGATCTGTGGGATTGGTGATGGGATAGTCGGATTTGTCCATGTATTTGATACTTTCCCGGGTTGATTGCCATGGATTTGCGGGATATGGCATTA
CCTTTCTCTGTGCTGACTGCGGGGGGATGGGGATCTGGGTGGGGGTTCGCTACGATTCTCTGCTTGATG------------------------------TGGTGATAGATCTGCCTGTATGCTTCGTGTTGCATTGAATGGTGCTTAGATCTGTGGGATTGGTGATGGGATAGTCGGATTTGTCCATGTATTTGATACTTTCCCGGGTTGATTGCCATGGATTTGCGGGATATGGCATTA	13	33	Deletion	0.02	-30	PFSVLTAGGWGSGWGFATILCLMW*	PFSVLTAGGWGSGWGFATILCLMWRRAVEIGTCW*	CCTTTCTCTGTGCTGACTGCGGGGGGATGGGGATCTGGGTGGGGGTTCGCTACGATTCTCTGCTTGATG------------------------------TGGTGATAGATCTGCCTGTATGCTTCGTGTTGCATTGAATGGTGCTTAGATCTGTGGGATTGGTGATGGGATAGTCGGATTTGTCCATGTATTTGATACTTTCCCGGGTTGATTGCCATGGATTTGCGGGATATGGCATTA	CCTTTCTCTGTGCTGACTGCGGGGGGATGGGGATCTGGGTGGGGGTTCGCTACGATTCTCTGCTTGATGTGGAGACGGGCGGTTGAGATCGGAACTTGTTGGTGATAGATCTGCCTGTATGCTTCGTGTTGCATTGAATGGTGCTTAGATCTGTGGGATTGGTGATGGGATAGTCGGATTTGTCCATGTATTTGATACTTTCCCGGGTTGATTGCCATGGATTTGCGGGATATGGCATTA
CCTTTCTCTGTGCTGACTGCGGGGGGATGGGGATCTGGGTGGGGGTTCGCTACGATTCTCTGCTTGATGCGGAGACGGGCGGTTGAGATCGGAACTTGTTGGTGATAGATCTGCCTGTATGCTTCGTGTTGCATTGAATGGTGCTTAGATCTGTGGGATTGGTGATGGGATAGTCGGATTTGTCCATGTATTTGATACTTTCCCGGGTTGATTGCCATGGATTTGCGGGATATGGCATTA	13	33	1 Base Change	0.02	0	PFSVLTAGGWGSGWGFATILCLMRRRAVEIGTCW*	PFSVLTAGGWGSGWGFATILCLMWRRAVEIGTCW*	CCTTTCTCTGTGCTGACTGCGGGGGGATGGGGATCTGGGTGGGGGTTCGCTACGATTCTCTGCTTGATGCGGAGACGGGCGGTTGAGATCGGAACTTGTTGGTGATAGATCTGCCTGTATGCTTCGTGTTGCATTGAATGGTGCTTAGATCTGTGGGATTGGTGATGGGATAGTCGGATTTGTCCATGTATTTGATACTTTCCCGGGTTGATTGCCATGGATTTGCGGGATATGGCATTA	CCTTTCTCTGTGCTGACTGCGGGGGGATGGGGATCTGGGTGGGGGTTCGCTACGATTCTCTGCTTGATGTGGAGACGGGCGGTTGAGATCGGAACTTGTTGGTGATAGATCTGCCTGTATGCTTCGTGTTGCATTGAATGGTGCTTAGATCTGTGGGATTGGTGATGGGATAGTCGGATTTGTCCATGTATTTGATACTTTCCCGGGTTGATTGCCATGGATTTGCGGGATATGGCATTA
CCTTTCTCTGTGCTGACTGCGGGGGGATGGGGATCTGGGTGGGGGTTCGCTACGATTCTCTGCTTGATGTG-----GGGCGGTTGAGATCGGAACTTGTTGGTGATAGATCTGCCTGTATGCTTCGTGTTGCATTGAATGGTGCTTAGATCTGTGGGATTGGTGATGGGATAGTCGGATTTGTCCATGTATTTGATACTTTCCCGGGTTGATTGCCATGGATTTGCGGGATATGGCATTA	13	33	Deletion	0.02	-5	PFSVLTAGGWGSGWGFATILCLMWGG*	PFSVLTAGGWGSGWGFATILCLMWRRAVEIGTCW*	CCTTTCTCTGTGCTGACTGCGGGGGGATGGGGATCTGGGTGGGGGTTCGCTACGATTCTCTGCTTGATGTG-----GGGCGGTTGAGATCGGAACTTGTTGGTGATAGATCTGCCTGTATGCTTCGTGTTGCATTGAATGGTGCTTAGATCTGTGGGATTGGTGATGGGATAGTCGGATTTGTCCATGTATTTGATACTTTCCCGGGTTGATTGCCATGGATTTGCGGGATATGGCATTA	CCTTTCTCTGTGCTGACTGCGGGGGGATGGGGATCTGGGTGGGGGTTCGCTACGATTCTCTGCTTGATGTGGAGACGGGCGGTTGAGATCGGAACTTGTTGGTGATAGATCTGCCTGTATGCTTCGTGTTGCATTGAATGGTGCTTAGATCTGTGGGATTGGTGATGGGATAGTCGGATTTGTCCATGTATTTGATACTTTCCCGGGTTGATTGCCATGGATTTGCGGGATATGGCATTA
CCTTTCTCTGTGCTGACTGCGGGGGGATGGGGATCTGGGTGGGGGTTCGCTACGATTCTCTGCTTGATGTGG----GGGCGGTTGAGATCGGAACTTGTTGGTGATAGATCTGCCTGTATGCTTCGTGTTGCATTGAATGGTGCTTAGATCTGTGGGATTGGTGATGGGATAGTCGGATTTGTCCATGTATTTGATACTTTCCCGGGCTGATTGCCATGGATTTGCGGGATATGGCATTA	13	33	Deletion	0.02	-4	PFSVLTAGGWGSGWGFATILCLMWGRLRSELVGDRSACMLRVALNGA*	PFSVLTAGGWGSGWGFATILCLMWRRAVEIGTCW*	CCTTTCTCTGTGCTGACTGCGGGGGGATGGGGATCTGGGTGGGGGTTCGCTACGATTCTCTGCTTGATGTGG----GGGCGGTTGAGATCGGAACTTGTTGGTGATAGATCTGCCTGTATGCTTCGTGTTGCATTGAATGGTGCTTAGATCTGTGGGATTGGTGATGGGATAGTCGGATTTGTCCATGTATTTGATACTTTCCCGGGCTGATTGCCATGGATTTGCGGGATATGGCATTA	CCTTTCTCTGTGCTGACTGCGGGGGGATGGGGATCTGGGTGGGGGTTCGCTACGATTCTCTGCTTGATGTGGAGACGGGCGGTTGAGATCGGAACTTGTTGGTGATAGATCTGCCTGTATGCTTCGTGTTGCATTGAATGGTGCTTAGATCTGTGGGATTGGTGATGGGATAGTCGGATTTGTCCATGTATTTGATACTTTCCCGGGTTGATTGCCATGGATTTGCGGGATATGGCATTA
CCTTTCTCTGTGCTGACTGCGGGGGGATGGGGATCTGGGTGGGGGTTCGCTACGATTCTCTGCTTGATGTGG----GGGCGGTTGAGATCGGAACTTGTTGGTGATAGATCTGCCTGTATGCTTCGTGTTGCATTGAATGGTGCTTAGATCTGTGGGATTGGTGATGGGATAGTCGGATTTGTCCATGTATTTGATACTTTCCCGGGTTGATTGCCATGGATTTGC-GGATATGGCATTA	13	31	Deletion	0.02	-5	PFSVLTAGGWGSGWGFATILCLMWGRLRSELVGDRSACMLRVALNGA*	PFSVLTAGGWGSGWGFATILCLMWRRAVEIGTCW*	CCTTTCTCTGTGCTGACTGCGGGGGGATGGGGATCTGGGTGGGGGTTCGCTACGATTCTCTGCTTGATGTGG----GGGCGGTTGAGATCGGAACTTGTTGGTGATAGATCTGCCTGTATGCTTCGTGTTGCATTGAATGGTGCTTAGATCTGTGGGATTGGTGATGGGATAGTCGGATTTGTCCATGTATTTGATACTTTCCCGGGTTGATTGCCATGGATTTGC-GGATATGGCATTA	CCTTTCTCTGTGCTGACTGCGGGGGGATGGGGATCTGGGTGGGGGTTCGCTACGATTCTCTGCTTGATGTGGAGACGGGCGGTTGAGATCGGAACTTGTTGGTGATAGATCTGCCTGTATGCTTCGTGTTGCATTGAATGGTGCTTAGATCTGTGGGATTGGTGATGGGATAGTCGGATTTGTCCATGTATTTGATACTTTCCCGGGTTGATTGCCATGGATTTGCGGGATATGGCATTA
CCTTTCTCTGTGCTGACTGCGGGGGGATGGGGATCTGGGTGGGGGTTCGCTACGATTCTCTGCTTGATGTGG---CGGGCGGTTGAGATCGGAACTTGTTGGTGATAGATCTGCCTGTATGCTTCGTGTTGCATTGAATGGTGCTTAGATCTGTGGGATTGGTGATGGGATAGTCGGATTTGTCCATGTATTTGATACTTTCCCGGGTTGATTGCCATGGATTTGCGGGATA-GGCATTA	13	30	Deletion	0.02	-4	PFSVLTAGGWGSGWGFATILCLMWRAVEIGTCW*	PFSVLTAGGWGSGWGFATILCLMWRRAVEIGTCW*	CCTTTCTCTGTGCTGACTGCGGGGGGATGGGGATCTGGGTGGGGGTTCGCTACGATTCTCTGCTTGATGTGG---CGGGCGGTTGAGATCGGAACTTGTTGGTGATAGATCTGCCTGTATGCTTCGTGTTGCATTGAATGGTGCTTAGATCTGTGGGATTGGTGATGGGATAGTCGGATTTGTCCATGTATTTGATACTTTCCCGGGTTGATTGCCATGGATTTGCGGGATA-GGCATTA	CCTTTCTCTGTGCTGACTGCGGGGGGATGGGGATCTGGGTGGGGGTTCGCTACGATTCTCTGCTTGATGTGGAGACGGGCGGTTGAGATCGGAACTTGTTGGTGATAGATCTGCCTGTATGCTTCGTGTTGCATTGAATGGTGCTTAGATCTGTGGGATTGGTGATGGGATAGTCGGATTTGTCCATGTATTTGATACTTTCCCGGGTTGATTGCCATGGATTTGCGGGATATGGCATTA
CCTTTCTCTGTGCTGACTGCGGGGGGATGGGGATCTGGGTGGGGGTTCGCTACGATTCTCTGCTTGATGTGG---CGGGCGGTTGAGATCGGAACTTGTTGGTGATAGATCTGCCTGTATGCTTCGTGTTGCATTGAATGGTGCTTAGATCTGTGGGATTGGTGATGGGATAGTCGGATTTGTCCATGTATTTGATACTTTCCCGGGTTGATTGCCATGGATTTGCGGGATATGGC-TTA	13	30	Deletion	0.02	-4	PFSVLTAGGWGSGWGFATILCLMWRAVEIGTCW*	PFSVLTAGGWGSGWGFATILCLMWRRAVEIGTCW*	CCTTTCTCTGTGCTGACTGCGGGGGGATGGGGATCTGGGTGGGGGTTCGCTACGATTCTCTGCTTGATGTGG---CGGGCGGTTGAGATCGGAACTTGTTGGTGATAGATCTGCCTGTATGCTTCGTGTTGCATTGAATGGTGCTTAGATCTGTGGGATTGGTGATGGGATAGTCGGATTTGTCCATGTATTTGATACTTTCCCGGGTTGATTGCCATGGATTTGCGGGATATGGC-TTA	CCTTTCTCTGTGCTGACTGCGGGGGGATGGGGATCTGGGTGGGGGTTCGCTACGATTCTCTGCTTGATGTGGAGACGGGCGGTTGAGATCGGAACTTGTTGGTGATAGATCTGCCTGTATGCTTCGTGTTGCATTGAATGGTGCTTAGATCTGTGGGATTGGTGATGGGATAGTCGGATTTGTCCATGTATTTGATACTTTCCCGGGTTGATTGCCATGGATTTGCGGGATATGGCATTA
CCTTTCTCTGTGCTGACTGCGGGGGGATGGGGATCTGGGTGGGGGTTCGCTACGATTCTCTGCTTGATGTGG---CGGGCGGTTGAGATCGGAACTTGTTGGTGATAGATCTGCCTGTATGCTTCGTGTTGCATTGAATGGTGCTTAGATCTGTGGGATTGGTGATGGGATAGTCGGATTTGTCCATGTATTTGATACTTTCCCGGGTTGATTGCCGTGGATTTGCGGGATATGGCATTA	13	29	Deletion	0.02	-3	PFSVLTAGGWGSGWGFATILCLMWRAVEIGTCW*	PFSVLTAGGWGSGWGFATILCLMWRRAVEIGTCW*	CCTTTCTCTGTGCTGACTGCGGGGGGATGGGGATCTGGGTGGGGGTTCGCTACGATTCTCTGCTTGATGTGG---CGGGCGGTTGAGATCGGAACTTGTTGGTGATAGATCTGCCTGTATGCTTCGTGTTGCATTGAATGGTGCTTAGATCTGTGGGATTGGTGATGGGATAGTCGGATTTGTCCATGTATTTGATACTTTCCCGGGTTGATTGCCGTGGATTTGCGGGATATGGCATTA	CCTTTCTCTGTGCTGACTGCGGGGGGATGGGGATCTGGGTGGGGGTTCGCTACGATTCTCTGCTTGATGTGGAGACGGGCGGTTGAGATCGGAACTTGTTGGTGATAGATCTGCCTGTATGCTTCGTGTTGCATTGAATGGTGCTTAGATCTGTGGGATTGGTGATGGGATAGTCGGATTTGTCCATGTATTTGATACTTTCCCGGGTTGATTGCCATGGATTTGCGGGATATGGCATTA
CCTTTCTCTGTGCTGACTGCGGGGGGATGGGGATCTGGGTGGGGGTTCGCTACGATTCTCTGCTTGATGTGGAGACcGGGCGGTTGAGATCGGAACTTGTTGGTGATAGATCTGCCCGTATGCTTCGTGTTGCATTGAATGGTGCTTAGATCTGTGGGATTGGTGATGGGATAGTCGGATTTGTCCATGTATTTGATACTTTCCCGGGTTGATTGCCATGGATTTGCGGGATATGGCATTA	13	34	Insertion	0.02	1	PFSVLTAGGWGSGWGFATILCLMWRPGG*	PFSVLTAGGWGSGWGFATILCLMWRRAVEIGTCW*	CCTTTCTCTGTGCTGACTGCGGGGGGATGGGGATCTGGGTGGGGGTTCGCTACGATTCTCTGCTTGATGTGGAGACCGGGCGGTTGAGATCGGAACTTGTTGGTGATAGATCTGCCCGTATGCTTCGTGTTGCATTGAATGGTGCTTAGATCTGTGGGATTGGTGATGGGATAGTCGGATTTGTCCATGTATTTGATACTTTCCCGGGTTGATTGCCATGGATTTGCGGGATATGGCATTA	CCTTTCTCTGTGCTGACTGCGGGGGGATGGGGATCTGGGTGGGGGTTCGCTACGATTCTCTGCTTGATGTGGAGACGGGCGGTTGAGATCGGAACTTGTTGGTGATAGATCTGCCTGTATGCTTCGTGTTGCATTGAATGGTGCTTAGATCTGTGGGATTGGTGATGGGATAGTCGGATTTGTCCATGTATTTGATACTTTCCCGGGTTGATTGCCATGGATTTGCGGGATATGGCATTA
CCTTTCTCTGTGCTGACTGCGGGGGGATGGGGATCTGGGTGGGGGTTCGCTACGATTCTCTGCTTGATGTGGAGACcGGGCGGTTGAGATCGGAACTTGTTGGTGATAGATCTGCCTGTATGCTCCGTGTTGCATTGAATGGTGCTTAGATCTGTGGGATTGGTGATGGGATAGTCGGATTTGTCCATGTATTTGATACTTTCCCGGGTTGATTGCCATGGATTTGCGGGATATGGCATTA	13	33	Insertion	0.02	1	PFSVLTAGGWGSGWGFATILCLMWRPGG*	PFSVLTAGGWGSGWGFATILCLMWRRAVEIGTCW*	CCTTTCTCTGTGCTGACTGCGGGGGGATGGGGATCTGGGTGGGGGTTCGCTACGATTCTCTGCTTGATGTGGAGACCGGGCGGTTGAGATCGGAACTTGTTGGTGATAGATCTGCCTGTATGCTCCGTGTTGCATTGAATGGTGCTTAGATCTGTGGGATTGGTGATGGGATAGTCGGATTTGTCCATGTATTTGATACTTTCCCGGGTTGATTGCCATGGATTTGCGGGATATGGCATTA	CCTTTCTCTGTGCTGACTGCGGGGGGATGGGGATCTGGGTGGGGGTTCGCTACGATTCTCTGCTTGATGTGGAGACGGGCGGTTGAGATCGGAACTTGTTGGTGATAGATCTGCCTGTATGCTTCGTGTTGCATTGAATGGTGCTTAGATCTGTGGGATTGGTGATGGGATAGTCGGATTTGTCCATGTATTTGATACTTTCCCGGGTTGATTGCCATGGATTTGCGGGATATGGCATTA
CCTTTCTCTGTGCTGACTGCGGGGGGATGGGGATCTGGGTGGGGGTTCGCTACGATTCTCTGCTTGATGTGGAGACcGGGCGGTTGAGATCGGAACTTGTTGGTGATAGATCTGCCTGTATGCTTCGTGTTGCATTGAATGGTGCTTAGATCTGTGGGATTGGTGATGGGATAGTCGGATTCGTCCATGTATTTGATACTTTCCCGGGTTGATTGCCATGGATTTGCGGGATATGGCATTA	13	33	Insertion	0.02	1	PFSVLTAGGWGSGWGFATILCLMWRPGG*	PFSVLTAGGWGSGWGFATILCLMWRRAVEIGTCW*	CCTTTCTCTGTGCTGACTGCGGGGGGATGGGGATCTGGGTGGGGGTTCGCTACGATTCTCTGCTTGATGTGGAGACCGGGCGGTTGAGATCGGAACTTGTTGGTGATAGATCTGCCTGTATGCTTCGTGTTGCATTGAATGGTGCTTAGATCTGTGGGATTGGTGATGGGATAGTCGGATTCGTCCATGTATTTGATACTTTCCCGGGTTGATTGCCATGGATTTGCGGGATATGGCATTA	CCTTTCTCTGTGCTGACTGCGGGGGGATGGGGATCTGGGTGGGGGTTCGCTACGATTCTCTGCTTGATGTGGAGACGGGCGGTTGAGATCGGAACTTGTTGGTGATAGATCTGCCTGTATGCTTCGTGTTGCATTGAATGGTGCTTAGATCTGTGGGATTGGTGATGGGATAGTCGGATTTGTCCATGTATTTGATACTTTCCCGGGTTGATTGCCATGGATTTGCGGGATATGGCATTA
CCTTTCTCTGTGCTGACTGCGGGGGGATGGGGATCTGGGTGGGGGTTCGCTACGATTCTCTGCTTGATGTGGAGACcGGGCGGTTGAGATCGGAACTTGTTGGTGATAGATCTGCCTGTATGCTTCGTGTTGCATTGAATGGTGCTTAGATCTGTGGGATTGGTGATGGGATAGTCGGATTTGTCCATGTATTCGATACTTTCCCGGGTTGATTGCCATGGATTTGCGGGATATGGCATTA	13	34	Insertion	0.02	1	PFSVLTAGGWGSGWGFATILCLMWRPGG*	PFSVLTAGGWGSGWGFATILCLMWRRAVEIGTCW*	CCTTTCTCTGTGCTGACTGCGGGGGGATGGGGATCTGGGTGGGGGTTCGCTACGATTCTCTGCTTGATGTGGAGACCGGGCGGTTGAGATCGGAACTTGTTGGTGATAGATCTGCCTGTATGCTTCGTGTTGCATTGAATGGTGCTTAGATCTGTGGGATTGGTGATGGGATAGTCGGATTTGTCCATGTATTCGATACTTTCCCGGGTTGATTGCCATGGATTTGCGGGATATGGCATTA	CCTTTCTCTGTGCTGACTGCGGGGGGATGGGGATCTGGGTGGGGGTTCGCTACGATTCTCTGCTTGATGTGGAGACGGGCGGTTGAGATCGGAACTTGTTGGTGATAGATCTGCCTGTATGCTTCGTGTTGCATTGAATGGTGCTTAGATCTGTGGGATTGGTGATGGGATAGTCGGATTTGTCCATGTATTTGATACTTTCCCGGGTTGATTGCCATGGATTTGCGGGATATGGCATTA
CCTTTCTCTGTGCTGACTGCGGGGGGATGGGGATCTGGGTGGGGGTTCGCTACGATTCTCTGCTTGATGTGGAGACcGGGCGGTTGAGATCGGAACTTGTTGGTGATAGATCTGCCTGTATGCTTCGTGTTGCATTGAATGGTGCTTAGATCTGTGGGATTGGTGATGGGATAGTCGGATTTGTCCATGTATTTGATGCTTTCCCGGGTTGATTGCCATGGATTTGCGGGATATGGCATTA	13	33	Insertion	0.02	1	PFSVLTAGGWGSGWGFATILCLMWRPGG*	PFSVLTAGGWGSGWGFATILCLMWRRAVEIGTCW*	CCTTTCTCTGTGCTGACTGCGGGGGGATGGGGATCTGGGTGGGGGTTCGCTACGATTCTCTGCTTGATGTGGAGACCGGGCGGTTGAGATCGGAACTTGTTGGTGATAGATCTGCCTGTATGCTTCGTGTTGCATTGAATGGTGCTTAGATCTGTGGGATTGGTGATGGGATAGTCGGATTTGTCCATGTATTTGATGCTTTCCCGGGTTGATTGCCATGGATTTGCGGGATATGGCATTA	CCTTTCTCTGTGCTGACTGCGGGGGGATGGGGATCTGGGTGGGGGTTCGCTACGATTCTCTGCTTGATGTGGAGACGGGCGGTTGAGATCGGAACTTGTTGGTGATAGATCTGCCTGTATGCTTCGTGTTGCATTGAATGGTGCTTAGATCTGTGGGATTGGTGATGGGATAGTCGGATTTGTCCATGTATTTGATACTTTCCCGGGTTGATTGCCATGGATTTGCGGGATATGGCATTA
CCTTTCTCTGTGCTGACTGCGGGGGGATGGGGATCTGGGTGGGGGTTCGCTACGATTCTCTGCTTGATGTGGAGACGGGCGGTCGAGATCGGAACTTGTTGGTGATAGATCTGCCTGTATGCTTCGTGTTGCATTGAATGGTGCTTAGATCTGTGGGATTGGTGATGGGATAGTCGGATTTGTCCATGTATTTGATACTTTCCCGGGTTGATTGCCATGGATTTGCGGGATATGGCATTA	13	32	1 Base Change	0.02	0	PFSVLTAGGWGSGWGFATILCLMWRRAVEIGTCW*	PFSVLTAGGWGSGWGFATILCLMWRRAVEIGTCW*	CCTTTCTCTGTGCTGACTGCGGGGGGATGGGGATCTGGGTGGGGGTTCGCTACGATTCTCTGCTTGATGTGGAGACGGGCGGTCGAGATCGGAACTTGTTGGTGATAGATCTGCCTGTATGCTTCGTGTTGCATTGAATGGTGCTTAGATCTGTGGGATTGGTGATGGGATAGTCGGATTTGTCCATGTATTTGATACTTTCCCGGGTTGATTGCCATGGATTTGCGGGATATGGCATTA	CCTTTCTCTGTGCTGACTGCGGGGGGATGGGGATCTGGGTGGGGGTTCGCTACGATTCTCTGCTTGATGTGGAGACGGGCGGTTGAGATCGGAACTTGTTGGTGATAGATCTGCCTGTATGCTTCGTGTTGCATTGAATGGTGCTTAGATCTGTGGGATTGGTGATGGGATAGTCGGATTTGTCCATGTATTTGATACTTTCCCGGGTTGATTGCCATGGATTTGCGGGATATGGCATTA
CCTTTCTCTGTGCTGACTGCGGGGGGATGGGGATCTGGGTGGGGGTTCGCTACGATTCTCTGCTTGATGTGGAGACGGGCGGTTGAGATCGGAACCTGTTGGTGATAGATCTGCCTGTATGCTTCGTGTTGCATTGAATGGTGCTTAGATCTGTGGGATTGGTGATGGGATAGTCGGATTTGTCCATGTATTTGATACTTTCCCGGGTTGATTGCCATGGATTTGCGGGATATGGCATTA	13	33	1 Base Change	0.02	0	PFSVLTAGGWGSGWGFATILCLMWRRAVEIGTCW*	PFSVLTAGGWGSGWGFATILCLMWRRAVEIGTCW*	CCTTTCTCTGTGCTGACTGCGGGGGGATGGGGATCTGGGTGGGGGTTCGCTACGATTCTCTGCTTGATGTGGAGACGGGCGGTTGAGATCGGAACCTGTTGGTGATAGATCTGCCTGTATGCTTCGTGTTGCATTGAATGGTGCTTAGATCTGTGGGATTGGTGATGGGATAGTCGGATTTGTCCATGTATTTGATACTTTCCCGGGTTGATTGCCATGGATTTGCGGGATATGGCATTA	CCTTTCTCTGTGCTGACTGCGGGGGGATGGGGATCTGGGTGGGGGTTCGCTACGATTCTCTGCTTGATGTGGAGACGGGCGGTTGAGATCGGAACTTGTTGGTGATAGATCTGCCTGTATGCTTCGTGTTGCATTGAATGGTGCTTAGATCTGTGGGATTGGTGATGGGATAGTCGGATTTGTCCATGTATTTGATACTTTCCCGGGTTGATTGCCATGGATTTGCGGGATATGGCATTA
CCTTTCTCTGTGCTGACTGCGGGGGGATGGGGATCTGGGTGGGGGTTCGCTACGATTCTCTGCTTGATGTGGAGACGGGCGGTTGAGATCGGAACTTGTTGGTGATAGATCCGCCTGTATGCTTCGTGTTGCATTGAATGGTGCTTAGATCTGTGGGATTGGTGATGGGATAGTCGGATTTGTCCATGTATTTGATACTTTCCCGGGTTGATTGCCATGGATTTGCGGGATATGGCATTA	13	32	1 Base Change	0.02	0	PFSVLTAGGWGSGWGFATILCLMWRRAVEIGTCW*	PFSVLTAGGWGSGWGFATILCLMWRRAVEIGTCW*	CCTTTCTCTGTGCTGACTGCGGGGGGATGGGGATCTGGGTGGGGGTTCGCTACGATTCTCTGCTTGATGTGGAGACGGGCGGTTGAGATCGGAACTTGTTGGTGATAGATCCGCCTGTATGCTTCGTGTTGCATTGAATGGTGCTTAGATCTGTGGGATTGGTGATGGGATAGTCGGATTTGTCCATGTATTTGATACTTTCCCGGGTTGATTGCCATGGATTTGCGGGATATGGCATTA	CCTTTCTCTGTGCTGACTGCGGGGGGATGGGGATCTGGGTGGGGGTTCGCTACGATTCTCTGCTTGATGTGGAGACGGGCGGTTGAGATCGGAACTTGTTGGTGATAGATCTGCCTGTATGCTTCGTGTTGCATTGAATGGTGCTTAGATCTGTGGGATTGGTGATGGGATAGTCGGATTTGTCCATGTATTTGATACTTTCCCGGGTTGATTGCCATGGATTTGCGGGATATGGCATTA
CCTTTCTCTGTGCTGACTGCGGGGGGATGGGGATCTGGGTGGGGGTTCGCTACGATTCTCTGCTTGATGTGGAGACGGGCGGTTGAGATCGGAACTTGTTGGTGATAGATCTGCCTGTATGCTTCGTGTTGCATCGAATGGTGCTTAGATCTGTGGGATTGGTGATGGGATAGTCGGATTTGTCCATGTATTTGATACTTTCCCGGGTTGATTGCCATGGATTTGCGGGATATGGCATTA	13	32	1 Base Change	0.02	0	PFSVLTAGGWGSGWGFATILCLMWRRAVEIGTCW*	PFSVLTAGGWGSGWGFATILCLMWRRAVEIGTCW*	CCTTTCTCTGTGCTGACTGCGGGGGGATGGGGATCTGGGTGGGGGTTCGCTACGATTCTCTGCTTGATGTGGAGACGGGCGGTTGAGATCGGAACTTGTTGGTGATAGATCTGCCTGTATGCTTCGTGTTGCATCGAATGGTGCTTAGATCTGTGGGATTGGTGATGGGATAGTCGGATTTGTCCATGTATTTGATACTTTCCCGGGTTGATTGCCATGGATTTGCGGGATATGGCATTA	CCTTTCTCTGTGCTGACTGCGGGGGGATGGGGATCTGGGTGGGGGTTCGCTACGATTCTCTGCTTGATGTGGAGACGGGCGGTTGAGATCGGAACTTGTTGGTGATAGATCTGCCTGTATGCTTCGTGTTGCATTGAATGGTGCTTAGATCTGTGGGATTGGTGATGGGATAGTCGGATTTGTCCATGTATTTGATACTTTCCCGGGTTGATTGCCATGGATTTGCGGGATATGGCATTA
CCTTTCTCTGTGCTGACTGCGGGGGGATGGGGATCTGGGTGGGGGTTCGCTACGATTCTCTGCTTGATGTGGAGACGGGCGGTTGAGATCGGAACTTGTTGGTGATAGATCTGCCTGTATGCTTCGTGTTGCATTGAATGGTGCTTAGATCTGTGGGATTGGTGATGGGATAGTCGGATTTGTCCATGTATTTGATACTTTCCCGGGTTGACTGCCATGGATTTGCGGGATATGGCATTA	13	33	1 Base Change	0.02	0	PFSVLTAGGWGSGWGFATILCLMWRRAVEIGTCW*	PFSVLTAGGWGSGWGFATILCLMWRRAVEIGTCW*	CCTTTCTCTGTGCTGACTGCGGGGGGATGGGGATCTGGGTGGGGGTTCGCTACGATTCTCTGCTTGATGTGGAGACGGGCGGTTGAGATCGGAACTTGTTGGTGATAGATCTGCCTGTATGCTTCGTGTTGCATTGAATGGTGCTTAGATCTGTGGGATTGGTGATGGGATAGTCGGATTTGTCCATGTATTTGATACTTTCCCGGGTTGACTGCCATGGATTTGCGGGATATGGCATTA	CCTTTCTCTGTGCTGACTGCGGGGGGATGGGGATCTGGGTGGGGGTTCGCTACGATTCTCTGCTTGATGTGGAGACGGGCGGTTGAGATCGGAACTTGTTGGTGATAGATCTGCCTGTATGCTTCGTGTTGCATTGAATGGTGCTTAGATCTGTGGGATTGGTGATGGGATAGTCGGATTTGTCCATGTATTTGATACTTTCCCGGGTTGATTGCCATGGATTTGCGGGATATGGCATTA
CCTTTCTCTGTGCTGACTGCGGGGGGATGGGGATCTGGGTGGGGGTTCGCTACGATTCTCTGCTTGATGTGGAGACGGGCGGTTGAGATCGGAACTTGTTGGTGATAGATCTGCCTGTATGCTTCGTGTTGCATTGAATGGTGCTTGGATCTGTGGGATTGGTGATGGGATAGTCGGATTTGTCCATGTATTTGATACTTTCCCGGGTTGATTGCCATGGATTTGCGGGATATGGCATTA	13	34	1 Base Change	0.02	0	PFSVLTAGGWGSGWGFATILCLMWRRAVEIGTCW*	PFSVLTAGGWGSGWGFATILCLMWRRAVEIGTCW*	CCTTTCTCTGTGCTGACTGCGGGGGGATGGGGATCTGGGTGGGGGTTCGCTACGATTCTCTGCTTGATGTGGAGACGGGCGGTTGAGATCGGAACTTGTTGGTGATAGATCTGCCTGTATGCTTCGTGTTGCATTGAATGGTGCTTGGATCTGTGGGATTGGTGATGGGATAGTCGGATTTGTCCATGTATTTGATACTTTCCCGGGTTGATTGCCATGGATTTGCGGGATATGGCATTA	CCTTTCTCTGTGCTGACTGCGGGGGGATGGGGATCTGGGTGGGGGTTCGCTACGATTCTCTGCTTGATGTGGAGACGGGCGGTTGAGATCGGAACTTGTTGGTGATAGATCTGCCTGTATGCTTCGTGTTGCATTGAATGGTGCTTAGATCTGTGGGATTGGTGATGGGATAGTCGGATTTGTCCATGTATTTGATACTTTCCCGGGTTGATTGCCATGGATTTGCGGGATATGGCATTA
CCTTTCTCTGTGCTGACTGCGGGGGGATGGGGATCTGGGTGGGGGTTCGCTACGATTCTCTGCTTGATGTGGAGACTgGGCGGTTGAGATCGGAACTTGTCGGTGATAGATCTGCCTGTATGCTTCGTGTTGCATTGAATGGTGCTTAGATCTGTGGGATTGGTGATGGGATAGTCGGATTTGTCCATGTATTTGATACTTTCCCGGGTTGATTGCCATGGATTTGCGGGATATGGCATTA	13	33	Insertion	0.02	1	PFSVLTAGGWGSGWGFATILCLMWRLGG*	PFSVLTAGGWGSGWGFATILCLMWRRAVEIGTCW*	CCTTTCTCTGTGCTGACTGCGGGGGGATGGGGATCTGGGTGGGGGTTCGCTACGATTCTCTGCTTGATGTGGAGACTGGGCGGTTGAGATCGGAACTTGTCGGTGATAGATCTGCCTGTATGCTTCGTGTTGCATTGAATGGTGCTTAGATCTGTGGGATTGGTGATGGGATAGTCGGATTTGTCCATGTATTTGATACTTTCCCGGGTTGATTGCCATGGATTTGCGGGATATGGCATTA	CCTTTCTCTGTGCTGACTGCGGGGGGATGGGGATCTGGGTGGGGGTTCGCTACGATTCTCTGCTTGATGTGGAGACGGGCGGTTGAGATCGGAACTTGTTGGTGATAGATCTGCCTGTATGCTTCGTGTTGCATTGAATGGTGCTTAGATCTGTGGGATTGGTGATGGGATAGTCGGATTTGTCCATGTATTTGATACTTTCCCGGGTTGATTGCCATGGATTTGCGGGATATGGCATTA
CCTTTCTCTGTGCTGACTGCGGGGGGATGGGGATCTGGGTGGGGGTTCGCTACGATTCTCTGCTTGATGTGGAGACTgGGCGGTTGAGATCGGAACTTGTTGGTGATAGATCTGCCCGTATGCTTCGTGTTGCATTGAATGGTGCTTAGATCTGTGGGATTGGTGATGGGATAGTCGGATTTGTCCATGTATTTGATACTTTCCCGGGTTGATTGCCATGGATTTGCGGGATATGGCATTA	13	33	Insertion	0.02	1	PFSVLTAGGWGSGWGFATILCLMWRLGG*	PFSVLTAGGWGSGWGFATILCLMWRRAVEIGTCW*	CCTTTCTCTGTGCTGACTGCGGGGGGATGGGGATCTGGGTGGGGGTTCGCTACGATTCTCTGCTTGATGTGGAGACTGGGCGGTTGAGATCGGAACTTGTTGGTGATAGATCTGCCCGTATGCTTCGTGTTGCATTGAATGGTGCTTAGATCTGTGGGATTGGTGATGGGATAGTCGGATTTGTCCATGTATTTGATACTTTCCCGGGTTGATTGCCATGGATTTGCGGGATATGGCATTA	CCTTTCTCTGTGCTGACTGCGGGGGGATGGGGATCTGGGTGGGGGTTCGCTACGATTCTCTGCTTGATGTGGAGACGGGCGGTTGAGATCGGAACTTGTTGGTGATAGATCTGCCTGTATGCTTCGTGTTGCATTGAATGGTGCTTAGATCTGTGGGATTGGTGATGGGATAGTCGGATTTGTCCATGTATTTGATACTTTCCCGGGTTGATTGCCATGGATTTGCGGGATATGGCATTA
CCTTTCTCTGTGCTGACTGCGGGGGGATGGGGATCTGGGTGGGGGTTCGCTACGATTCTCTGCTTGATGTGGAGACTgGGCGGTTGAGATCGGAACTTGTTGGTGATAGATCTGCCTGTATGCTTCGTGTTGCATTGAATGGTGCTTAGATCTGCGGGATTGGTGATGGGATAGTCGGATTTGTCCATGTATTTGATACTTTCCCGGGTTGATTGCCATGGATTTGCGGGATATGGCATTA	13	33	Insertion	0.02	1	PFSVLTAGGWGSGWGFATILCLMWRLGG*	PFSVLTAGGWGSGWGFATILCLMWRRAVEIGTCW*	CCTTTCTCTGTGCTGACTGCGGGGGGATGGGGATCTGGGTGGGGGTTCGCTACGATTCTCTGCTTGATGTGGAGACTGGGCGGTTGAGATCGGAACTTGTTGGTGATAGATCTGCCTGTATGCTTCGTGTTGCATTGAATGGTGCTTAGATCTGCGGGATTGGTGATGGGATAGTCGGATTTGTCCATGTATTTGATACTTTCCCGGGTTGATTGCCATGGATTTGCGGGATATGGCATTA	CCTTTCTCTGTGCTGACTGCGGGGGGATGGGGATCTGGGTGGGGGTTCGCTACGATTCTCTGCTTGATGTGGAGACGGGCGGTTGAGATCGGAACTTGTTGGTGATAGATCTGCCTGTATGCTTCGTGTTGCATTGAATGGTGCTTAGATCTGTGGGATTGGTGATGGGATAGTCGGATTTGTCCATGTATTTGATACTTTCCCGGGTTGATTGCCATGGATTTGCGGGATATGGCATTA
CCTTTCTCTGTGCTGACTGCGGGGGGATGGGGATCTGGGTGGGGGTTCGCTACGATTCTCTGCTTGATGTGGAGACTgGGCGGTTGAGATCGGAACTTGTTGGTGATAGATCTGCCTGTATGCTTCGTGTTGCATTGAATGGTGCTTAGATCTGTGGGATTGGTGATGGGATAGTCGGATTTGTCCATGTATTTGATACTCTCCCGGGTTGATTGCCATGGATTTGCGGGATATGGCATTA	13	33	Insertion	0.02	1	PFSVLTAGGWGSGWGFATILCLMWRLGG*	PFSVLTAGGWGSGWGFATILCLMWRRAVEIGTCW*	CCTTTCTCTGTGCTGACTGCGGGGGGATGGGGATCTGGGTGGGGGTTCGCTACGATTCTCTGCTTGATGTGGAGACTGGGCGGTTGAGATCGGAACTTGTTGGTGATAGATCTGCCTGTATGCTTCGTGTTGCATTGAATGGTGCTTAGATCTGTGGGATTGGTGATGGGATAGTCGGATTTGTCCATGTATTTGATACTCTCCCGGGTTGATTGCCATGGATTTGCGGGATATGGCATTA	CCTTTCTCTGTGCTGACTGCGGGGGGATGGGGATCTGGGTGGGGGTTCGCTACGATTCTCTGCTTGATGTGGAGACGGGCGGTTGAGATCGGAACTTGTTGGTGATAGATCTGCCTGTATGCTTCGTGTTGCATTGAATGGTGCTTAGATCTGTGGGATTGGTGATGGGATAGTCGGATTTGTCCATGTATTTGATACTTTCCCGGGTTGATTGCCATGGATTTGCGGGATATGGCATTA
CCTTTCTCTGTGCTGACTGCGGGGGGATGGGGATCTGGGTGGGGGTTCGCTACGATTCTCTGCTTGATGTGGAGACTgGGCGGTTGAGATCGGAACTTGTTGGTGATAGATCTGCCTGTATGCTTCGTGTTGCATTGAATGGTGCTTAGATCTGTGGGATTGGTGATGGGATAGTCGGATTTGTCCATGTATTTGGTACTTTCCCGGGTTGATTGCCATGGATTTGCGGGATATGGCATTA	13	32	Insertion	0.02	1	PFSVLTAGGWGSGWGFATILCLMWRLGG*	PFSVLTAGGWGSGWGFATILCLMWRRAVEIGTCW*	CCTTTCTCTGTGCTGACTGCGGGGGGATGGGGATCTGGGTGGGGGTTCGCTACGATTCTCTGCTTGATGTGGAGACTGGGCGGTTGAGATCGGAACTTGTTGGTGATAGATCTGCCTGTATGCTTCGTGTTGCATTGAATGGTGCTTAGATCTGTGGGATTGGTGATGGGATAGTCGGATTTGTCCATGTATTTGGTACTTTCCCGGGTTGATTGCCATGGATTTGCGGGATATGGCATTA	CCTTTCTCTGTGCTGACTGCGGGGGGATGGGGATCTGGGTGGGGGTTCGCTACGATTCTCTGCTTGATGTGGAGACGGGCGGTTGAGATCGGAACTTGTTGGTGATAGATCTGCCTGTATGCTTCGTGTTGCATTGAATGGTGCTTAGATCTGTGGGATTGGTGATGGGATAGTCGGATTTGTCCATGTATTTGATACTTTCCCGGGTTGATTGCCATGGATTTGCGGGATATGGCATTA
CCTTTCTCTGTGCTGACTGCGGGGGGATGGGGATCTGGGTGGGGGTTCGCTACGATTCTCTGCTTGATGTGGGGACTgGGCGGTTGAGATCGGAACTTGTTGGTGATAGATCTGCCTGTATGCTTCGTGTTGCATTGAATGGTGCTTAGATCTGTGGGATTGGTGATGGGATAGTCGGATTTGTCCATGTATTTGATACTTTCCCGGGTTGATTGCCATGGATTTGCGGGATATGGCATTA	13	34	Insertion	0.02	1	PFSVLTAGGWGSGWGFATILCLMWGLGG*	PFSVLTAGGWGSGWGFATILCLMWRRAVEIGTCW*	CCTTTCTCTGTGCTGACTGCGGGGGGATGGGGATCTGGGTGGGGGTTCGCTACGATTCTCTGCTTGATGTGGGGACTGGGCGGTTGAGATCGGAACTTGTTGGTGATAGATCTGCCTGTATGCTTCGTGTTGCATTGAATGGTGCTTAGATCTGTGGGATTGGTGATGGGATAGTCGGATTTGTCCATGTATTTGATACTTTCCCGGGTTGATTGCCATGGATTTGCGGGATATGGCATTA	CCTTTCTCTGTGCTGACTGCGGGGGGATGGGGATCTGGGTGGGGGTTCGCTACGATTCTCTGCTTGATGTGGAGACGGGCGGTTGAGATCGGAACTTGTTGGTGATAGATCTGCCTGTATGCTTCGTGTTGCATTGAATGGTGCTTAGATCTGTGGGATTGGTGATGGGATAGTCGGATTTGTCCATGTATTTGATACTTTCCCGGGTTGATTGCCATGGATTTGCGGGATATGGCATTA
CCTTTCTCTGTGCTGACTGCGGGGGGATGGGGATCTGGGTGGGGGTTCGCTACGATTCTCTGCTTGGTGTGGAGACTgGGCGGTTGAGATCGGAACTTGTTGGTGATAGATCTGCCTGTATGCTTCGTGTTGCATTGAATGGTGCTTAGATCTGTGGGATTGGTGATGGGATAGTCGGATTTGTCCATGTATTTGATACTTTCCCGGGTTGATTGCCATGGATTTGCGGGATATGGCATTA	13	33	Insertion	0.02	1	PFSVLTAGGWGSGWGFATILCLVWRLGG*	PFSVLTAGGWGSGWGFATILCLMWRRAVEIGTCW*	CCTTTCTCTGTGCTGACTGCGGGGGGATGGGGATCTGGGTGGGGGTTCGCTACGATTCTCTGCTTGGTGTGGAGACTGGGCGGTTGAGATCGGAACTTGTTGGTGATAGATCTGCCTGTATGCTTCGTGTTGCATTGAATGGTGCTTAGATCTGTGGGATTGGTGATGGGATAGTCGGATTTGTCCATGTATTTGATACTTTCCCGGGTTGATTGCCATGGATTTGCGGGATATGGCATTA	CCTTTCTCTGTGCTGACTGCGGGGGGATGGGGATCTGGGTGGGGGTTCGCTACGATTCTCTGCTTGATGTGGAGACGGGCGGTTGAGATCGGAACTTGTTGGTGATAGATCTGCCTGTATGCTTCGTGTTGCATTGAATGGTGCTTAGATCTGTGGGATTGGTGATGGGATAGTCGGATTTGTCCATGTATTTGATACTTTCCCGGGTTGATTGCCATGGATTTGCGGGATATGGCATTA
CCTTTCTCTGTGCTGACTGCGGGGGGGTGGGGATCTGGGTGGGGGTTCGCTACGATTCTCTGCTTGATGTGG---CGGGCGGTTGAGATCGGAACTTGTTGGTGATAGATCTGCCTGTATGCTTCGTGTTGCATTGAATGGTGCTTAGATCTGTGGGATTGGTGATGGGATAGTCGGATTTGTCCATGTATTTGATACTTTCCCGGGTTGATTGCCATGGATTTGCGGGATATGGCATTA	13	29	Deletion	0.02	-3	PFSVLTAGGWGSGWGFATILCLMWRAVEIGTCW*	PFSVLTAGGWGSGWGFATILCLMWRRAVEIGTCW*	CCTTTCTCTGTGCTGACTGCGGGGGGGTGGGGATCTGGGTGGGGGTTCGCTACGATTCTCTGCTTGATGTGG---CGGGCGGTTGAGATCGGAACTTGTTGGTGATAGATCTGCCTGTATGCTTCGTGTTGCATTGAATGGTGCTTAGATCTGTGGGATTGGTGATGGGATAGTCGGATTTGTCCATGTATTTGATACTTTCCCGGGTTGATTGCCATGGATTTGCGGGATATGGCATTA	CCTTTCTCTGTGCTGACTGCGGGGGGATGGGGATCTGGGTGGGGGTTCGCTACGATTCTCTGCTTGATGTGGAGACGGGCGGTTGAGATCGGAACTTGTTGGTGATAGATCTGCCTGTATGCTTCGTGTTGCATTGAATGGTGCTTAGATCTGTGGGATTGGTGATGGGATAGTCGGATTTGTCCATGTATTTGATACTTTCCCGGGTTGATTGCCATGGATTTGCGGGATATGGCATTA
CCTTTCTCTGTGCTGACTGCGGGGGGATGGGGATCCGGGTGGGGGTTCGCTACGATTCTCTGCTTGATGTGGAGACcGGGCGGTTGAGATCGGAACTTGTTGGTGATAGATCTGCCTGTATGCTTCGTGTTGCATTGAATGGTGCTTAGATCTGTGGGATTGGTGATGGGATAGTCGGATTTGTCCATGTATTTGATACTTTCCCGGGTTGATTGCCATGGATTTGCGGGATATGGCATTA	12	33	Insertion	0.02	1	PFSVLTAGGWGSGWGFATILCLMWRPGG*	PFSVLTAGGWGSGWGFATILCLMWRRAVEIGTCW*	CCTTTCTCTGTGCTGACTGCGGGGGGATGGGGATCCGGGTGGGGGTTCGCTACGATTCTCTGCTTGATGTGGAGACCGGGCGGTTGAGATCGGAACTTGTTGGTGATAGATCTGCCTGTATGCTTCGTGTTGCATTGAATGGTGCTTAGATCTGTGGGATTGGTGATGGGATAGTCGGATTTGTCCATGTATTTGATACTTTCCCGGGTTGATTGCCATGGATTTGCGGGATATGGCATTA	CCTTTCTCTGTGCTGACTGCGGGGGGATGGGGATCTGGGTGGGGGTTCGCTACGATTCTCTGCTTGATGTGGAGACGGGCGGTTGAGATCGGAACTTGTTGGTGATAGATCTGCCTGTATGCTTCGTGTTGCATTGAATGGTGCTTAGATCTGTGGGATTGGTGATGGGATAGTCGGATTTGTCCATGTATTTGATACTTTCCCGGGTTGATTGCCATGGATTTGCGGGATATGGCATTA
CCTTTCTCTGTGCTGACTGCGGGGGGATGGGGATCTGGGCGGGGGTTCGCTACGATTCTCTGCTTGATGTGG---CGGGCGGTTGAGATCGGAACTTGTTGGTGATAGATCTGCCTGTATGCTTCGTGTTGCATTGAATGGTGCTTAGATCTGTGGGATTGGTGATGGGATAGTCGGATTTGTCCATGTATTTGATACTTTCCCGGGTTGATTGCCATGGATTTGCGGGATATGGCATTA	12	28	Deletion	0.02	-3	PFSVLTAGGWGSGRGFATILCLMWRAVEIGTCW*	PFSVLTAGGWGSGWGFATILCLMWRRAVEIGTCW*	CCTTTCTCTGTGCTGACTGCGGGGGGATGGGGATCTGGGCGGGGGTTCGCTACGATTCTCTGCTTGATGTGG---CGGGCGGTTGAGATCGGAACTTGTTGGTGATAGATCTGCCTGTATGCTTCGTGTTGCATTGAATGGTGCTTAGATCTGTGGGATTGGTGATGGGATAGTCGGATTTGTCCATGTATTTGATACTTTCCCGGGTTGATTGCCATGGATTTGCGGGATATGGCATTA	CCTTTCTCTGTGCTGACTGCGGGGGGATGGGGATCTGGGTGGGGGTTCGCTACGATTCTCTGCTTGATGTGGAGACGGGCGGTTGAGATCGGAACTTGTTGGTGATAGATCTGCCTGTATGCTTCGTGTTGCATTGAATGGTGCTTAGATCTGTGGGATTGGTGATGGGATAGTCGGATTTGTCCATGTATTTGATACTTTCCCGGGTTGATTGCCATGGATTTGCGGGATATGGCATTA
CCTTTCTCTGTGCTGACTGCGGGGGGATGGGGATCTGGGT-GGGGTTCGCTACGATTCTCTGCTTGATGTGGAGACTgGGCGGTTGAGATCGGAACTTGTTGGTGATAGATCTGCCTGTATGCTTCGTGTTGCATTGAATGGTGCTTAGATCTGTGGGATTGGTGATGGGATAGTCGGATTTGTCCATGTATTTGATACTTTCCCGGGTTGATTGCCATGGATTTGCGGGATATGGCATTA	12	35	Insertion and Deletion	0.02	0	PFSVLTAGGWGSGWGSLRFSA*	PFSVLTAGGWGSGWGFATILCLMWRRAVEIGTCW*	CCTTTCTCTGTGCTGACTGCGGGGGGATGGGGATCTGGGT-GGGGTTCGCTACGATTCTCTGCTTGATGTGGAGACTGGGCGGTTGAGATCGGAACTTGTTGGTGATAGATCTGCCTGTATGCTTCGTGTTGCATTGAATGGTGCTTAGATCTGTGGGATTGGTGATGGGATAGTCGGATTTGTCCATGTATTTGATACTTTCCCGGGTTGATTGCCATGGATTTGCGGGATATGGCATTA	CCTTTCTCTGTGCTGACTGCGGGGGGATGGGGATCTGGGTGGGGGTTCGCTACGATTCTCTGCTTGATGTGGAGACGGGCGGTTGAGATCGGAACTTGTTGGTGATAGATCTGCCTGTATGCTTCGTGTTGCATTGAATGGTGCTTAGATCTGTGGGATTGGTGATGGGATAGTCGGATTTGTCCATGTATTTGATACTTTCCCGGGTTGATTGCCATGGATTTGCGGGATATGGCATTA
CCTTTCTCTGTGCTGACTGCGGGGGGATGGGGATCTGGGTGGGGGCTCGCTACGATTCTCTGCTTGATGTGGAGACcGGGCGGTTGAGATCGGAACTTGTTGGTGATAGATCTGCCTGTATGCTTCGTGTTGCATTGAATGGTGCTTAGATCTGTGGGATTGGTGATGGGATAGTCGGATTTGTCCATGTATTTGATACTTTCCCGGGTTGATTGCCATGGATTTGCGGGATATGGCATTA	12	33	Insertion	0.02	1	PFSVLTAGGWGSGWGLATILCLMWRPGG*	PFSVLTAGGWGSGWGFATILCLMWRRAVEIGTCW*	CCTTTCTCTGTGCTGACTGCGGGGGGATGGGGATCTGGGTGGGGGCTCGCTACGATTCTCTGCTTGATGTGGAGACCGGGCGGTTGAGATCGGAACTTGTTGGTGATAGATCTGCCTGTATGCTTCGTGTTGCATTGAATGGTGCTTAGATCTGTGGGATTGGTGATGGGATAGTCGGATTTGTCCATGTATTTGATACTTTCCCGGGTTGATTGCCATGGATTTGCGGGATATGGCATTA	CCTTTCTCTGTGCTGACTGCGGGGGGATGGGGATCTGGGTGGGGGTTCGCTACGATTCTCTGCTTGATGTGGAGACGGGCGGTTGAGATCGGAACTTGTTGGTGATAGATCTGCCTGTATGCTTCGTGTTGCATTGAATGGTGCTTAGATCTGTGGGATTGGTGATGGGATAGTCGGATTTGTCCATGTATTTGATACTTTCCCGGGTTGATTGCCATGGATTTGCGGGATATGGCATTA
CCTTTCTCTGTGCTGACTGCGGGGGGATGGGGATCTGGGTGGGGGTTCGCTACGACTCTCTGCTTGATGTGGAGACcGGGCGGTTGAGATCGGAACTTGTTGGTGATAGATCTGCCTGTATGCTTCGTGTTGCATTGAATGGTGCTTAGATCTGTGGGATTGGTGATGGGATAGTCGGATTTGTCCATGTATTTGATACTTTCCCGGGTTGATTGCCATGGATTTGCGGGATATGGCATTA	12	34	Insertion	0.02	1	PFSVLTAGGWGSGWGFATTLCLMWRPGG*	PFSVLTAGGWGSGWGFATILCLMWRRAVEIGTCW*	CCTTTCTCTGTGCTGACTGCGGGGGGATGGGGATCTGGGTGGGGGTTCGCTACGACTCTCTGCTTGATGTGGAGACCGGGCGGTTGAGATCGGAACTTGTTGGTGATAGATCTGCCTGTATGCTTCGTGTTGCATTGAATGGTGCTTAGATCTGTGGGATTGGTGATGGGATAGTCGGATTTGTCCATGTATTTGATACTTTCCCGGGTTGATTGCCATGGATTTGCGGGATATGGCATTA	CCTTTCTCTGTGCTGACTGCGGGGGGATGGGGATCTGGGTGGGGGTTCGCTACGATTCTCTGCTTGATGTGGAGACGGGCGGTTGAGATCGGAACTTGTTGGTGATAGATCTGCCTGTATGCTTCGTGTTGCATTGAATGGTGCTTAGATCTGTGGGATTGGTGATGGGATAGTCGGATTTGTCCATGTATTTGATACTTTCCCGGGTTGATTGCCATGGATTTGCGGGATATGGCATTA
CCTTTCTCTGTGCTGACTGCGGGGGGATGGGGATCTGGGTGGGGGTTCGCTACGATTCCCTGCTTGATGTGG---CGGGCGGTTGAGATCGGAACTTGTTGGTGATAGATCTGCCTGTATGCTTCGTGTTGCATTGAATGGTGCTTAGATCTGTGGGATTGGTGATGGGATAGTCGGATTTGTCCATGTATTTGATACTTTCCCGGGTTGATTGCCATGGATTTGCGGGATATGGCATTA	12	29	Deletion	0.02	-3	PFSVLTAGGWGSGWGFATIPCLMWRAVEIGTCW*	PFSVLTAGGWGSGWGFATILCLMWRRAVEIGTCW*	CCTTTCTCTGTGCTGACTGCGGGGGGATGGGGATCTGGGTGGGGGTTCGCTACGATTCCCTGCTTGATGTGG---CGGGCGGTTGAGATCGGAACTTGTTGGTGATAGATCTGCCTGTATGCTTCGTGTTGCATTGAATGGTGCTTAGATCTGTGGGATTGGTGATGGGATAGTCGGATTTGTCCATGTATTTGATACTTTCCCGGGTTGATTGCCATGGATTTGCGGGATATGGCATTA	CCTTTCTCTGTGCTGACTGCGGGGGGATGGGGATCTGGGTGGGGGTTCGCTACGATTCTCTGCTTGATGTGGAGACGGGCGGTTGAGATCGGAACTTGTTGGTGATAGATCTGCCTGTATGCTTCGTGTTGCATTGAATGGTGCTTAGATCTGTGGGATTGGTGATGGGATAGTCGGATTTGTCCATGTATTTGATACTTTCCCGGGTTGATTGCCATGGATTTGCGGGATATGGCATTA
CCTTTCTCTGTGCTGACTGCGGGGGGATGGGGATCTGGGTGGGGGTTCGCTACGATTCTCTGCCTGATGTGGAGACTgGGCGGTTGAGATCGGAACTTGTTGGTGATAGATCTGCCTGTATGCTTCGTGTTGCATTGAATGGTGCTTAGATCTGTGGGATTGGTGATGGGATAGTCGGATTTGTCCATGTATTTGATACTTTCCCGGGTTGATTGCCATGGATTTGCGGGATATGGCATTA	12	33	Insertion	0.02	1	PFSVLTAGGWGSGWGFATILCLMWRLGG*	PFSVLTAGGWGSGWGFATILCLMWRRAVEIGTCW*	CCTTTCTCTGTGCTGACTGCGGGGGGATGGGGATCTGGGTGGGGGTTCGCTACGATTCTCTGCCTGATGTGGAGACTGGGCGGTTGAGATCGGAACTTGTTGGTGATAGATCTGCCTGTATGCTTCGTGTTGCATTGAATGGTGCTTAGATCTGTGGGATTGGTGATGGGATAGTCGGATTTGTCCATGTATTTGATACTTTCCCGGGTTGATTGCCATGGATTTGCGGGATATGGCATTA	CCTTTCTCTGTGCTGACTGCGGGGGGATGGGGATCTGGGTGGGGGTTCGCTACGATTCTCTGCTTGATGTGGAGACGGGCGGTTGAGATCGGAACTTGTTGGTGATAGATCTGCCTGTATGCTTCGTGTTGCATTGAATGGTGCTTAGATCTGTGGGATTGGTGATGGGATAGTCGGATTTGTCCATGTATTTGATACTTTCCCGGGTTGATTGCCATGGATTTGCGGGATATGGCATTA
CCTTTCTCTGTGCTGACTGCGGGGGGATGGGGATCTGGGTGGGGGTTCGCTACGATTCTCTGCTTGATGTGG----GGGCGGTTGAGATCGGAACTTGTTGGTGATAGATCTGCCTGTATGCTTCGTGCTGCATTGAATGGTGCTTAGATCTGTGGGATTGGTGATGGGATAGTCGGATTTGTCCATGTATTTGATACTTTCCCGGGTTGATTGCCATGGATTTGCGGGATATGGCATTA	12	32	Deletion	0.02	-4	PFSVLTAGGWGSGWGFATILCLMWGRLRSELVGDRSACMLRAALNGA*	PFSVLTAGGWGSGWGFATILCLMWRRAVEIGTCW*	CCTTTCTCTGTGCTGACTGCGGGGGGATGGGGATCTGGGTGGGGGTTCGCTACGATTCTCTGCTTGATGTGG----GGGCGGTTGAGATCGGAACTTGTTGGTGATAGATCTGCCTGTATGCTTCGTGCTGCATTGAATGGTGCTTAGATCTGTGGGATTGGTGATGGGATAGTCGGATTTGTCCATGTATTTGATACTTTCCCGGGTTGATTGCCATGGATTTGCGGGATATGGCATTA	CCTTTCTCTGTGCTGACTGCGGGGGGATGGGGATCTGGGTGGGGGTTCGCTACGATTCTCTGCTTGATGTGGAGACGGGCGGTTGAGATCGGAACTTGTTGGTGATAGATCTGCCTGTATGCTTCGTGTTGCATTGAATGGTGCTTAGATCTGTGGGATTGGTGATGGGATAGTCGGATTTGTCCATGTATTTGATACTTTCCCGGGTTGATTGCCATGGATTTGCGGGATATGGCATTA
CCTTTCTCTGTGCTGACTGCGGGGGGATGGGGATCTGGGTGGGGGTTCGCTACGATTCTCTGCTTGATGTGG---CGGGCGGTTGAGATCGGAACTTGTTGGTGATAGATCCGCCTGTATGCTTCGTGTTGCATTGAATGGTGCTTAGATCTGTGGGATTGGTGATGGGATAGTCGGATTTGTCCATGTATTTGATACTTTCCCGGGTTGATTGCCATGGATTTGCGGGATATGGCATTA	12	26	Deletion	0.02	-3	PFSVLTAGGWGSGWGFATILCLMWRAVEIGTCW*	PFSVLTAGGWGSGWGFATILCLMWRRAVEIGTCW*	CCTTTCTCTGTGCTGACTGCGGGGGGATGGGGATCTGGGTGGGGGTTCGCTACGATTCTCTGCTTGATGTGG---CGGGCGGTTGAGATCGGAACTTGTTGGTGATAGATCCGCCTGTATGCTTCGTGTTGCATTGAATGGTGCTTAGATCTGTGGGATTGGTGATGGGATAGTCGGATTTGTCCATGTATTTGATACTTTCCCGGGTTGATTGCCATGGATTTGCGGGATATGGCATTA	CCTTTCTCTGTGCTGACTGCGGGGGGATGGGGATCTGGGTGGGGGTTCGCTACGATTCTCTGCTTGATGTGGAGACGGGCGGTTGAGATCGGAACTTGTTGGTGATAGATCTGCCTGTATGCTTCGTGTTGCATTGAATGGTGCTTAGATCTGTGGGATTGGTGATGGGATAGTCGGATTTGTCCATGTATTTGATACTTTCCCGGGTTGATTGCCATGGATTTGCGGGATATGGCATTA
CCTTTCTCTGTGCTGACTGCGGGGGGATGGGGATCTGGGTGGGGGTTCGCTACGATTCTCTGCTTGATGTGG---CGGGCGGTTGAGATCGGAACTTGTTGGTGATAGATCTGCCTGCATGCTTCGTGTTGCATTGAATGGTGCTTAGATCTGTGGGATTGGTGATGGGATAGTCGGATTTGTCCATGTATTTGATACTTTCCCGGGTTGATTGCCATGGATTTGCGGGATATGGCATTA	12	31	Deletion	0.02	-3	PFSVLTAGGWGSGWGFATILCLMWRAVEIGTCW*	PFSVLTAGGWGSGWGFATILCLMWRRAVEIGTCW*	CCTTTCTCTGTGCTGACTGCGGGGGGATGGGGATCTGGGTGGGGGTTCGCTACGATTCTCTGCTTGATGTGG---CGGGCGGTTGAGATCGGAACTTGTTGGTGATAGATCTGCCTGCATGCTTCGTGTTGCATTGAATGGTGCTTAGATCTGTGGGATTGGTGATGGGATAGTCGGATTTGTCCATGTATTTGATACTTTCCCGGGTTGATTGCCATGGATTTGCGGGATATGGCATTA	CCTTTCTCTGTGCTGACTGCGGGGGGATGGGGATCTGGGTGGGGGTTCGCTACGATTCTCTGCTTGATGTGGAGACGGGCGGTTGAGATCGGAACTTGTTGGTGATAGATCTGCCTGTATGCTTCGTGTTGCATTGAATGGTGCTTAGATCTGTGGGATTGGTGATGGGATAGTCGGATTTGTCCATGTATTTGATACTTTCCCGGGTTGATTGCCATGGATTTGCGGGATATGGCATTA
CCTTTCTCTGTGCTGACTGCGGGGGGATGGGGATCTGGGTGGGGGTTCGCTACGATTCTCTGCTTGATGTGG---CGGGCGGTTGAGATCGGAACTTGTTGGTGATAGATCTGCCTGTACGCTTCGTGTTGCATTGAATGGTGCTTAGATCTGTGGGATTGGTGATGGGATAGTCGGATTTGTCCATGTATTTGATACTTTCCCGGGTTGATTGCCATGGATTTGCGGGATATGGCATTA	12	30	Deletion	0.02	-3	PFSVLTAGGWGSGWGFATILCLMWRAVEIGTCW*	PFSVLTAGGWGSGWGFATILCLMWRRAVEIGTCW*	CCTTTCTCTGTGCTGACTGCGGGGGGATGGGGATCTGGGTGGGGGTTCGCTACGATTCTCTGCTTGATGTGG---CGGGCGGTTGAGATCGGAACTTGTTGGTGATAGATCTGCCTGTACGCTTCGTGTTGCATTGAATGGTGCTTAGATCTGTGGGATTGGTGATGGGATAGTCGGATTTGTCCATGTATTTGATACTTTCCCGGGTTGATTGCCATGGATTTGCGGGATATGGCATTA	CCTTTCTCTGTGCTGACTGCGGGGGGATGGGGATCTGGGTGGGGGTTCGCTACGATTCTCTGCTTGATGTGGAGACGGGCGGTTGAGATCGGAACTTGTTGGTGATAGATCTGCCTGTATGCTTCGTGTTGCATTGAATGGTGCTTAGATCTGTGGGATTGGTGATGGGATAGTCGGATTTGTCCATGTATTTGATACTTTCCCGGGTTGATTGCCATGGATTTGCGGGATATGGCATTA
CCTTTCTCTGTGCTGACTGCGGGGGGATGGGGATCTGGGTGGGGGTTCGCTACGATTCTCTGCTTGATGTGG---CGGGCGGTTGAGATCGGAACTTGTTGGTGATAGATCTGCCTGTATGCTCCGTGTTGCATTGAATGGTGCTTAGATCTGTGGGATTGGTGATGGGATAGTCGGATTTGTCCATGTATTTGATACTTTCCCGGGTTGATTGCCATGGATTTGCGGGATATGGCATTA	12	30	Deletion	0.02	-3	PFSVLTAGGWGSGWGFATILCLMWRAVEIGTCW*	PFSVLTAGGWGSGWGFATILCLMWRRAVEIGTCW*	CCTTTCTCTGTGCTGACTGCGGGGGGATGGGGATCTGGGTGGGGGTTCGCTACGATTCTCTGCTTGATGTGG---CGGGCGGTTGAGATCGGAACTTGTTGGTGATAGATCTGCCTGTATGCTCCGTGTTGCATTGAATGGTGCTTAGATCTGTGGGATTGGTGATGGGATAGTCGGATTTGTCCATGTATTTGATACTTTCCCGGGTTGATTGCCATGGATTTGCGGGATATGGCATTA	CCTTTCTCTGTGCTGACTGCGGGGGGATGGGGATCTGGGTGGGGGTTCGCTACGATTCTCTGCTTGATGTGGAGACGGGCGGTTGAGATCGGAACTTGTTGGTGATAGATCTGCCTGTATGCTTCGTGTTGCATTGAATGGTGCTTAGATCTGTGGGATTGGTGATGGGATAGTCGGATTTGTCCATGTATTTGATACTTTCCCGGGTTGATTGCCATGGATTTGCGGGATATGGCATTA
CCTTTCTCTGTGCTGACTGCGGGGGGATGGGGATCTGGGTGGGGGTTCGCTACGATTCTCTGCTTGATGTGG---CGGGCGGTTGAGATCGGAACTTGTTGGTGATAGATCTGCCTGTATGCTTCGCGTTGCATTGAATGGTGCTTAGATCTGTGGGATTGGTGATGGGATAGTCGGATTTGTCCATGTATTTGATACTTTCCCGGGTTGATTGCCATGGATTTGCGGGATATGGCATTA	12	30	Deletion	0.02	-3	PFSVLTAGGWGSGWGFATILCLMWRAVEIGTCW*	PFSVLTAGGWGSGWGFATILCLMWRRAVEIGTCW*	CCTTTCTCTGTGCTGACTGCGGGGGGATGGGGATCTGGGTGGGGGTTCGCTACGATTCTCTGCTTGATGTGG---CGGGCGGTTGAGATCGGAACTTGTTGGTGATAGATCTGCCTGTATGCTTCGCGTTGCATTGAATGGTGCTTAGATCTGTGGGATTGGTGATGGGATAGTCGGATTTGTCCATGTATTTGATACTTTCCCGGGTTGATTGCCATGGATTTGCGGGATATGGCATTA	CCTTTCTCTGTGCTGACTGCGGGGGGATGGGGATCTGGGTGGGGGTTCGCTACGATTCTCTGCTTGATGTGGAGACGGGCGGTTGAGATCGGAACTTGTTGGTGATAGATCTGCCTGTATGCTTCGTGTTGCATTGAATGGTGCTTAGATCTGTGGGATTGGTGATGGGATAGTCGGATTTGTCCATGTATTTGATACTTTCCCGGGTTGATTGCCATGGATTTGCGGGATATGGCATTA
CCTTTCTCTGTGCTGACTGCGGGGGGATGGGGATCTGGGTGGGGGTTCGCTACGATTCTCTGCTTGATGTGG---CGGGCGGTTGAGATCGGAACTTGTTGGTGATAGATCTGCCTGTATGCTTCGTGCTGCATTGAATGGTGCTTAGATCTGTGGGATTGGTGATGGGATAGTCGGATTTGTCCATGTATTTGATACTTTCCCGGGTTGATTGCCATGGATTTGCGGGATATGGCATTA	12	30	Deletion	0.02	-3	PFSVLTAGGWGSGWGFATILCLMWRAVEIGTCW*	PFSVLTAGGWGSGWGFATILCLMWRRAVEIGTCW*	CCTTTCTCTGTGCTGACTGCGGGGGGATGGGGATCTGGGTGGGGGTTCGCTACGATTCTCTGCTTGATGTGG---CGGGCGGTTGAGATCGGAACTTGTTGGTGATAGATCTGCCTGTATGCTTCGTGCTGCATTGAATGGTGCTTAGATCTGTGGGATTGGTGATGGGATAGTCGGATTTGTCCATGTATTTGATACTTTCCCGGGTTGATTGCCATGGATTTGCGGGATATGGCATTA	CCTTTCTCTGTGCTGACTGCGGGGGGATGGGGATCTGGGTGGGGGTTCGCTACGATTCTCTGCTTGATGTGGAGACGGGCGGTTGAGATCGGAACTTGTTGGTGATAGATCTGCCTGTATGCTTCGTGTTGCATTGAATGGTGCTTAGATCTGTGGGATTGGTGATGGGATAGTCGGATTTGTCCATGTATTTGATACTTTCCCGGGTTGATTGCCATGGATTTGCGGGATATGGCATTA
CCTTTCTCTGTGCTGACTGCGGGGGGATGGGGATCTGGGTGGGGGTTCGCTACGATTCTCTGCTTGATGTGG---CGGGCGGTTGAGATCGGAACTTGTTGGTGATAGATCTGCCTGTATGCTTCGTGTTGCATTGAATGGTGCTTAGATCTGTGGGATTGGTGATGGGATAGTCGGATTCGTCCATGTATTTGATACTTTCCCGGGTTGATTGCCATGGATTTGCGGGATATGGCATTA	12	30	Deletion	0.02	-3	PFSVLTAGGWGSGWGFATILCLMWRAVEIGTCW*	PFSVLTAGGWGSGWGFATILCLMWRRAVEIGTCW*	CCTTTCTCTGTGCTGACTGCGGGGGGATGGGGATCTGGGTGGGGGTTCGCTACGATTCTCTGCTTGATGTGG---CGGGCGGTTGAGATCGGAACTTGTTGGTGATAGATCTGCCTGTATGCTTCGTGTTGCATTGAATGGTGCTTAGATCTGTGGGATTGGTGATGGGATAGTCGGATTCGTCCATGTATTTGATACTTTCCCGGGTTGATTGCCATGGATTTGCGGGATATGGCATTA	CCTTTCTCTGTGCTGACTGCGGGGGGATGGGGATCTGGGTGGGGGTTCGCTACGATTCTCTGCTTGATGTGGAGACGGGCGGTTGAGATCGGAACTTGTTGGTGATAGATCTGCCTGTATGCTTCGTGTTGCATTGAATGGTGCTTAGATCTGTGGGATTGGTGATGGGATAGTCGGATTTGTCCATGTATTTGATACTTTCCCGGGTTGATTGCCATGGATTTGCGGGATATGGCATTA
CCTTTCTCTGTGCTGACTGCGGGGGGATGGGGATCTGGGTGGGGGTTCGCTACGATTCTCTGCTTGATGTGG---CGGGCGGTTGAGATCGGAACTTGTTGGTGATAGATCTGCCTGTATGCTTCGTGTTGCATTGAATGGTGCTTAGATCTGTGGGATTGGTGGTGGGATAGTCGGATTTGTCCATGTATTTGATACTTTCCCGGGTTGATTGCCATGGATTTGCGGGATATGGCATTA	12	29	Deletion	0.02	-3	PFSVLTAGGWGSGWGFATILCLMWRAVEIGTCW*	PFSVLTAGGWGSGWGFATILCLMWRRAVEIGTCW*	CCTTTCTCTGTGCTGACTGCGGGGGGATGGGGATCTGGGTGGGGGTTCGCTACGATTCTCTGCTTGATGTGG---CGGGCGGTTGAGATCGGAACTTGTTGGTGATAGATCTGCCTGTATGCTTCGTGTTGCATTGAATGGTGCTTAGATCTGTGGGATTGGTGGTGGGATAGTCGGATTTGTCCATGTATTTGATACTTTCCCGGGTTGATTGCCATGGATTTGCGGGATATGGCATTA	CCTTTCTCTGTGCTGACTGCGGGGGGATGGGGATCTGGGTGGGGGTTCGCTACGATTCTCTGCTTGATGTGGAGACGGGCGGTTGAGATCGGAACTTGTTGGTGATAGATCTGCCTGTATGCTTCGTGTTGCATTGAATGGTGCTTAGATCTGTGGGATTGGTGATGGGATAGTCGGATTTGTCCATGTATTTGATACTTTCCCGGGTTGATTGCCATGGATTTGCGGGATATGGCATTA
CCTTTCTCTGTGCTGACTGCGGGGGGATGGGGATCTGGGTGGGGGTTCGCTACGATTCTCTGCTTGATGTGG---CGGGCGGTTGAGATCGGAACTTGTTGGTGATAGATCTGCCTGTATGCTTCGTGTTGCATTGAGTGGTGCTTAGATCTGTGGGATTGGTGATGGGATAGTCGGATTTGTCCATGTATTTGATACTTTCCCGGGTTGATTGCCATGGATTTGCGGGATATGGCATTA	12	29	Deletion	0.02	-3	PFSVLTAGGWGSGWGFATILCLMWRAVEIGTCW*	PFSVLTAGGWGSGWGFATILCLMWRRAVEIGTCW*	CCTTTCTCTGTGCTGACTGCGGGGGGATGGGGATCTGGGTGGGGGTTCGCTACGATTCTCTGCTTGATGTGG---CGGGCGGTTGAGATCGGAACTTGTTGGTGATAGATCTGCCTGTATGCTTCGTGTTGCATTGAGTGGTGCTTAGATCTGTGGGATTGGTGATGGGATAGTCGGATTTGTCCATGTATTTGATACTTTCCCGGGTTGATTGCCATGGATTTGCGGGATATGGCATTA	CCTTTCTCTGTGCTGACTGCGGGGGGATGGGGATCTGGGTGGGGGTTCGCTACGATTCTCTGCTTGATGTGGAGACGGGCGGTTGAGATCGGAACTTGTTGGTGATAGATCTGCCTGTATGCTTCGTGTTGCATTGAATGGTGCTTAGATCTGTGGGATTGGTGATGGGATAGTCGGATTTGTCCATGTATTTGATACTTTCCCGGGTTGATTGCCATGGATTTGCGGGATATGGCATTA
CCTTTCTCTGTGCTGACTGCGGGGGGATGGGGATCTGGGTGGGGGTTCGCTACGATTCTCTGCTTGATGTGG---CGGGCGGTTGAGATCGGAGCTTGTTGGTGATAGATCTGCCTGTATGCTTCGTGTTGCATTGAATGGTGCTTAGATCTGTGGGATTGGTGATGGGATAGTCGGATTTGTCCATGTATTTGATACTTTCCCGGGTTGATTGCCATGGATTTGCGGGATATGGCATTA	12	30	Deletion	0.02	-3	PFSVLTAGGWGSGWGFATILCLMWRAVEIGACW*	PFSVLTAGGWGSGWGFATILCLMWRRAVEIGTCW*	CCTTTCTCTGTGCTGACTGCGGGGGGATGGGGATCTGGGTGGGGGTTCGCTACGATTCTCTGCTTGATGTGG---CGGGCGGTTGAGATCGGAGCTTGTTGGTGATAGATCTGCCTGTATGCTTCGTGTTGCATTGAATGGTGCTTAGATCTGTGGGATTGGTGATGGGATAGTCGGATTTGTCCATGTATTTGATACTTTCCCGGGTTGATTGCCATGGATTTGCGGGATATGGCATTA	CCTTTCTCTGTGCTGACTGCGGGGGGATGGGGATCTGGGTGGGGGTTCGCTACGATTCTCTGCTTGATGTGGAGACGGGCGGTTGAGATCGGAACTTGTTGGTGATAGATCTGCCTGTATGCTTCGTGTTGCATTGAATGGTGCTTAGATCTGTGGGATTGGTGATGGGATAGTCGGATTTGTCCATGTATTTGATACTTTCCCGGGTTGATTGCCATGGATTTGCGGGATATGGCATTA
CCTTTCTCTGTGCTGACTGCGGGGGGATGGGGATCTGGGTGGGGGTTCGCTACGATTCTCTGCTTGATGTGGA---GGGCGGTTGAGATCGGAACTTGTTGGTGATAGATCTGCCTGTATGCTTCGTGTTGCATTGAATGGTGCTTAGATCTGTGGGATTGGTGATGGGATAGTCGGATTTGTCCATGTATTTGATACCTTCCCGGGTTGATTGCCATGGATTTGCGGGATATGGCATTA	12	34	Deletion	0.02	-3	PFSVLTAGGWGSGWGFATILCLMWRAVEIGTCW*	PFSVLTAGGWGSGWGFATILCLMWRRAVEIGTCW*	CCTTTCTCTGTGCTGACTGCGGGGGGATGGGGATCTGGGTGGGGGTTCGCTACGATTCTCTGCTTGATGTGGA---GGGCGGTTGAGATCGGAACTTGTTGGTGATAGATCTGCCTGTATGCTTCGTGTTGCATTGAATGGTGCTTAGATCTGTGGGATTGGTGATGGGATAGTCGGATTTGTCCATGTATTTGATACCTTCCCGGGTTGATTGCCATGGATTTGCGGGATATGGCATTA	CCTTTCTCTGTGCTGACTGCGGGGGGATGGGGATCTGGGTGGGGGTTCGCTACGATTCTCTGCTTGATGTGGAGACGGGCGGTTGAGATCGGAACTTGTTGGTGATAGATCTGCCTGTATGCTTCGTGTTGCATTGAATGGTGCTTAGATCTGTGGGATTGGTGATGGGATAGTCGGATTTGTCCATGTATTTGATACTTTCCCGGGTTGATTGCCATGGATTTGCGGGATATGGCATTA
CCTTTCTCTGTGCTGACTGCGGGGGGATGGGGATCTGGGTGGGGGTTCGCTACGATTCTCTGCTTGATGTGGAGACcGGGCGGTTGAGATCGGAACTTGTTGGTGATAGATCTGCCTGTATGCTTCGCGTTGCATTGAATGGTGCTTAGATCTGTGGGATTGGTGATGGGATAGTCGGATTTGTCCATGTATTTGATACTTTCCCGGGTTGATTGCCATGGATTTGCGGGATATGGCATTA	12	33	Insertion	0.02	1	PFSVLTAGGWGSGWGFATILCLMWRPGG*	PFSVLTAGGWGSGWGFATILCLMWRRAVEIGTCW*	CCTTTCTCTGTGCTGACTGCGGGGGGATGGGGATCTGGGTGGGGGTTCGCTACGATTCTCTGCTTGATGTGGAGACCGGGCGGTTGAGATCGGAACTTGTTGGTGATAGATCTGCCTGTATGCTTCGCGTTGCATTGAATGGTGCTTAGATCTGTGGGATTGGTGATGGGATAGTCGGATTTGTCCATGTATTTGATACTTTCCCGGGTTGATTGCCATGGATTTGCGGGATATGGCATTA	CCTTTCTCTGTGCTGACTGCGGGGGGATGGGGATCTGGGTGGGGGTTCGCTACGATTCTCTGCTTGATGTGGAGACGGGCGGTTGAGATCGGAACTTGTTGGTGATAGATCTGCCTGTATGCTTCGTGTTGCATTGAATGGTGCTTAGATCTGTGGGATTGGTGATGGGATAGTCGGATTTGTCCATGTATTTGATACTTTCCCGGGTTGATTGCCATGGATTTGCGGGATATGGCATTA
CCTTTCTCTGTGCTGACTGCGGGGGGATGGGGATCTGGGTGGGGGTTCGCTACGATTCTCTGCTTGATGTGGAGACcGGGCGGTTGAGATCGGAACTTGTTGGTGATAGATCTGCCTGTATGCTTCGTGTTGCATTGAATGGTGCTTAGATCTGTGGGATTGGTGATGGGATAGTCGGATTTGTCCATGTATTTGATACTTTCCCGGGTTGGTTGCCATGGATTTGCGGGATATGGCATTA	12	33	Insertion	0.02	1	PFSVLTAGGWGSGWGFATILCLMWRPGG*	PFSVLTAGGWGSGWGFATILCLMWRRAVEIGTCW*	CCTTTCTCTGTGCTGACTGCGGGGGGATGGGGATCTGGGTGGGGGTTCGCTACGATTCTCTGCTTGATGTGGAGACCGGGCGGTTGAGATCGGAACTTGTTGGTGATAGATCTGCCTGTATGCTTCGTGTTGCATTGAATGGTGCTTAGATCTGTGGGATTGGTGATGGGATAGTCGGATTTGTCCATGTATTTGATACTTTCCCGGGTTGGTTGCCATGGATTTGCGGGATATGGCATTA	CCTTTCTCTGTGCTGACTGCGGGGGGATGGGGATCTGGGTGGGGGTTCGCTACGATTCTCTGCTTGATGTGGAGACGGGCGGTTGAGATCGGAACTTGTTGGTGATAGATCTGCCTGTATGCTTCGTGTTGCATTGAATGGTGCTTAGATCTGTGGGATTGGTGATGGGATAGTCGGATTTGTCCATGTATTTGATACTTTCCCGGGTTGATTGCCATGGATTTGCGGGATATGGCATTA
CCTTTCTCTGTGCTGACTGCGGGGGGATGGGGATCTGGGTGGGGGTTCGCTACGATTCTCTGCTTGATGTGGAGACcGGGCGGTTGAGATCGGAACTTGTTGGTGATAGATCTGCCTGTATGCTTCGTGTTGCATTGAATGGTGCTTAGATCTGTGGGATTGGTGGTGGGATAGTCGGATTTGTCCATGTATTTGATACTTTCCCGGGTTGATTGCCATGGATTTGCGGGATATGGCATTA	12	34	Insertion	0.02	1	PFSVLTAGGWGSGWGFATILCLMWRPGG*	PFSVLTAGGWGSGWGFATILCLMWRRAVEIGTCW*	CCTTTCTCTGTGCTGACTGCGGGGGGATGGGGATCTGGGTGGGGGTTCGCTACGATTCTCTGCTTGATGTGGAGACCGGGCGGTTGAGATCGGAACTTGTTGGTGATAGATCTGCCTGTATGCTTCGTGTTGCATTGAATGGTGCTTAGATCTGTGGGATTGGTGGTGGGATAGTCGGATTTGTCCATGTATTTGATACTTTCCCGGGTTGATTGCCATGGATTTGCGGGATATGGCATTA	CCTTTCTCTGTGCTGACTGCGGGGGGATGGGGATCTGGGTGGGGGTTCGCTACGATTCTCTGCTTGATGTGGAGACGGGCGGTTGAGATCGGAACTTGTTGGTGATAGATCTGCCTGTATGCTTCGTGTTGCATTGAATGGTGCTTAGATCTGTGGGATTGGTGATGGGATAGTCGGATTTGTCCATGTATTTGATACTTTCCCGGGTTGATTGCCATGGATTTGCGGGATATGGCATTA
CCTTTCTCTGTGCTGACTGCGGGGGGATGGGGATCTGGGTGGGGGTTCGCTACGATTCTCTGCTTGATGTGGAGACcGGGCGGTTGAGATCGGAACTTGTTGGTGATAGATCTGCCTGTATGCTTCGTGTTGCATTGAATGGTGCTTAGATCTGTGGGGTTGGTGATGGGATAGTCGGATTTGTCCATGTATTTGATACTTTCCCGGGTTGATTGCCATGGATTTGCGGGATATGGCATTA	12	33	Insertion	0.02	1	PFSVLTAGGWGSGWGFATILCLMWRPGG*	PFSVLTAGGWGSGWGFATILCLMWRRAVEIGTCW*	CCTTTCTCTGTGCTGACTGCGGGGGGATGGGGATCTGGGTGGGGGTTCGCTACGATTCTCTGCTTGATGTGGAGACCGGGCGGTTGAGATCGGAACTTGTTGGTGATAGATCTGCCTGTATGCTTCGTGTTGCATTGAATGGTGCTTAGATCTGTGGGGTTGGTGATGGGATAGTCGGATTTGTCCATGTATTTGATACTTTCCCGGGTTGATTGCCATGGATTTGCGGGATATGGCATTA	CCTTTCTCTGTGCTGACTGCGGGGGGATGGGGATCTGGGTGGGGGTTCGCTACGATTCTCTGCTTGATGTGGAGACGGGCGGTTGAGATCGGAACTTGTTGGTGATAGATCTGCCTGTATGCTTCGTGTTGCATTGAATGGTGCTTAGATCTGTGGGATTGGTGATGGGATAGTCGGATTTGTCCATGTATTTGATACTTTCCCGGGTTGATTGCCATGGATTTGCGGGATATGGCATTA
CCTTTCTCTGTGCTGACTGCGGGGGGATGGGGATCTGGGTGGGGGTTCGCTACGATTCTCTGCTTGATGTGGAGACcGGGCGGTTGAGATCGGAACTTGTTGGTGATAGATCTGCCTGTATGCTTCGTGTTGCATTGAGTGGTGCTTAGATCTGTGGGATTGGTGATGGGATAGTCGGATTTGTCCATGTATTTGATACTTTCCCGGGTTGATTGCCATGGATTTGCGGGATATGGCATTA	12	33	Insertion	0.02	1	PFSVLTAGGWGSGWGFATILCLMWRPGG*	PFSVLTAGGWGSGWGFATILCLMWRRAVEIGTCW*	CCTTTCTCTGTGCTGACTGCGGGGGGATGGGGATCTGGGTGGGGGTTCGCTACGATTCTCTGCTTGATGTGGAGACCGGGCGGTTGAGATCGGAACTTGTTGGTGATAGATCTGCCTGTATGCTTCGTGTTGCATTGAGTGGTGCTTAGATCTGTGGGATTGGTGATGGGATAGTCGGATTTGTCCATGTATTTGATACTTTCCCGGGTTGATTGCCATGGATTTGCGGGATATGGCATTA	CCTTTCTCTGTGCTGACTGCGGGGGGATGGGGATCTGGGTGGGGGTTCGCTACGATTCTCTGCTTGATGTGGAGACGGGCGGTTGAGATCGGAACTTGTTGGTGATAGATCTGCCTGTATGCTTCGTGTTGCATTGAATGGTGCTTAGATCTGTGGGATTGGTGATGGGATAGTCGGATTTGTCCATGTATTTGATACTTTCCCGGGTTGATTGCCATGGATTTGCGGGATATGGCATTA
CCTTTCTCTGTGCTGACTGCGGGGGGATGGGGATCTGGGTGGGGGTTCGCTACGATTCTCTGCTTGATGTGGAGACcGGGCGGTTGAGATCGGAGCTTGTTGGTGATAGATCTGCCTGTATGCTTCGTGTTGCATTGAATGGTGCTTAGATCTGTGGGATTGGTGATGGGATAGTCGGATTTGTCCATGTATTTGATACTTTCCCGGGTTGATTGCCATGGATTTGCGGGATATGGCATTA	12	33	Insertion	0.02	1	PFSVLTAGGWGSGWGFATILCLMWRPGG*	PFSVLTAGGWGSGWGFATILCLMWRRAVEIGTCW*	CCTTTCTCTGTGCTGACTGCGGGGGGATGGGGATCTGGGTGGGGGTTCGCTACGATTCTCTGCTTGATGTGGAGACCGGGCGGTTGAGATCGGAGCTTGTTGGTGATAGATCTGCCTGTATGCTTCGTGTTGCATTGAATGGTGCTTAGATCTGTGGGATTGGTGATGGGATAGTCGGATTTGTCCATGTATTTGATACTTTCCCGGGTTGATTGCCATGGATTTGCGGGATATGGCATTA	CCTTTCTCTGTGCTGACTGCGGGGGGATGGGGATCTGGGTGGGGGTTCGCTACGATTCTCTGCTTGATGTGGAGACGGGCGGTTGAGATCGGAACTTGTTGGTGATAGATCTGCCTGTATGCTTCGTGTTGCATTGAATGGTGCTTAGATCTGTGGGATTGGTGATGGGATAGTCGGATTTGTCCATGTATTTGATACTTTCCCGGGTTGATTGCCATGGATTTGCGGGATATGGCATTA
CCTTTCTCTGTGCTGACTGCGGGGGGATGGGGATCTGGGTGGGGGTTCGCTACGATTCTCTGCTTGATGTGGAGACcGGGCGGTTGAGATCGGGACTTGTTGGTGATAGATCTGCCTGTATGCTTCGTGTTGCATTGAATGGTGCTTAGATCTGTGGGATTGGTGATGGGATAGTCGGATTTGTCCATGTATTTGATACTTTCCCGGGTTGATTGCCATGGATTTGCGGGATATGGCATTA	12	34	Insertion	0.02	1	PFSVLTAGGWGSGWGFATILCLMWRPGG*	PFSVLTAGGWGSGWGFATILCLMWRRAVEIGTCW*	CCTTTCTCTGTGCTGACTGCGGGGGGATGGGGATCTGGGTGGGGGTTCGCTACGATTCTCTGCTTGATGTGGAGACCGGGCGGTTGAGATCGGGACTTGTTGGTGATAGATCTGCCTGTATGCTTCGTGTTGCATTGAATGGTGCTTAGATCTGTGGGATTGGTGATGGGATAGTCGGATTTGTCCATGTATTTGATACTTTCCCGGGTTGATTGCCATGGATTTGCGGGATATGGCATTA	CCTTTCTCTGTGCTGACTGCGGGGGGATGGGGATCTGGGTGGGGGTTCGCTACGATTCTCTGCTTGATGTGGAGACGGGCGGTTGAGATCGGAACTTGTTGGTGATAGATCTGCCTGTATGCTTCGTGTTGCATTGAATGGTGCTTAGATCTGTGGGATTGGTGATGGGATAGTCGGATTTGTCCATGTATTTGATACTTTCCCGGGTTGATTGCCATGGATTTGCGGGATATGGCATTA
CCTTTCTCTGTGCTGACTGCGGGGGGATGGGGATCTGGGTGGGGGTTCGCTACGATTCTCTGCTTGATGTGGAGACcGGGCGGTTGAGGTCGGAACTTGTTGGTGATAGATCTGCCTGTATGCTTCGTGTTGCATTGAATGGTGCTTAGATCTGTGGGATTGGTGATGGGATAGTCGGATTTGTCCATGTATTTGATACTTTCCCGGGTTGATTGCCATGGATTTGCGGGATATGGCATTA	12	34	Insertion	0.02	1	PFSVLTAGGWGSGWGFATILCLMWRPGG*	PFSVLTAGGWGSGWGFATILCLMWRRAVEIGTCW*	CCTTTCTCTGTGCTGACTGCGGGGGGATGGGGATCTGGGTGGGGGTTCGCTACGATTCTCTGCTTGATGTGGAGACCGGGCGGTTGAGGTCGGAACTTGTTGGTGATAGATCTGCCTGTATGCTTCGTGTTGCATTGAATGGTGCTTAGATCTGTGGGATTGGTGATGGGATAGTCGGATTTGTCCATGTATTTGATACTTTCCCGGGTTGATTGCCATGGATTTGCGGGATATGGCATTA	CCTTTCTCTGTGCTGACTGCGGGGGGATGGGGATCTGGGTGGGGGTTCGCTACGATTCTCTGCTTGATGTGGAGACGGGCGGTTGAGATCGGAACTTGTTGGTGATAGATCTGCCTGTATGCTTCGTGTTGCATTGAATGGTGCTTAGATCTGTGGGATTGGTGATGGGATAGTCGGATTTGTCCATGTATTTGATACTTTCCCGGGTTGATTGCCATGGATTTGCGGGATATGGCATTA
CCTTTCTCTGTGCTGACTGCGGGGGGATGGGGATCTGGGTGGGGGTTCGCTACGATTCTCTGCTTGATGTGGAGACGGGCGGTTGAGATCGGAACTTGTTGGTGATAGATCTGCCTGTATGCTTCGTGTTGCATTGAATGGTGCTTAGATCTGTGGGATTGGTGATGGGATAGTCGGACTTGTCCATGTATTTGATACTTTCCCGGGTTGATTGCCATGGATTTGCGGGATATGGCATTA	12	33	1 Base Change	0.02	0	PFSVLTAGGWGSGWGFATILCLMWRRAVEIGTCW*	PFSVLTAGGWGSGWGFATILCLMWRRAVEIGTCW*	CCTTTCTCTGTGCTGACTGCGGGGGGATGGGGATCTGGGTGGGGGTTCGCTACGATTCTCTGCTTGATGTGGAGACGGGCGGTTGAGATCGGAACTTGTTGGTGATAGATCTGCCTGTATGCTTCGTGTTGCATTGAATGGTGCTTAGATCTGTGGGATTGGTGATGGGATAGTCGGACTTGTCCATGTATTTGATACTTTCCCGGGTTGATTGCCATGGATTTGCGGGATATGGCATTA	CCTTTCTCTGTGCTGACTGCGGGGGGATGGGGATCTGGGTGGGGGTTCGCTACGATTCTCTGCTTGATGTGGAGACGGGCGGTTGAGATCGGAACTTGTTGGTGATAGATCTGCCTGTATGCTTCGTGTTGCATTGAATGGTGCTTAGATCTGTGGGATTGGTGATGGGATAGTCGGATTTGTCCATGTATTTGATACTTTCCCGGGTTGATTGCCATGGATTTGCGGGATATGGCATTA
CCTTTCTCTGTGCTGACTGCGGGGGGATGGGGATCTGGGTGGGGGTTCGCTACGATTCTCTGCTTGATGTGGAGACGGGCGGTTGAGATCGGAACTTGTTGGTGATAGATCTGCCTGTATGCTTCGTGTTGCATTGAATGGTGCTTAGATCTGTGGGATTGGTGATGGGATAGTCGGATTTGTCCATGTATTTGATACTTTCCCGGGTTGATTGCCATGGATTTGTGGGATATGGCATTA	12	33	1 Base Change	0.02	0	PFSVLTAGGWGSGWGFATILCLMWRRAVEIGTCW*	PFSVLTAGGWGSGWGFATILCLMWRRAVEIGTCW*	CCTTTCTCTGTGCTGACTGCGGGGGGATGGGGATCTGGGTGGGGGTTCGCTACGATTCTCTGCTTGATGTGGAGACGGGCGGTTGAGATCGGAACTTGTTGGTGATAGATCTGCCTGTATGCTTCGTGTTGCATTGAATGGTGCTTAGATCTGTGGGATTGGTGATGGGATAGTCGGATTTGTCCATGTATTTGATACTTTCCCGGGTTGATTGCCATGGATTTGTGGGATATGGCATTA	CCTTTCTCTGTGCTGACTGCGGGGGGATGGGGATCTGGGTGGGGGTTCGCTACGATTCTCTGCTTGATGTGGAGACGGGCGGTTGAGATCGGAACTTGTTGGTGATAGATCTGCCTGTATGCTTCGTGTTGCATTGAATGGTGCTTAGATCTGTGGGATTGGTGATGGGATAGTCGGATTTGTCCATGTATTTGATACTTTCCCGGGTTGATTGCCATGGATTTGCGGGATATGGCATTA
CCTTTCTCTGTGCTGACTGCGGGGGGATGGGGATCTGGGTGGGGGTTCGCTACGATTCTCTGCTTGATGTGGAGACTgGGCGGTTGAGACCGGAACTTGTTGGTGATAGATCTGCCTGTATGCTTCGTGTTGCATTGAATGGTGCTTAGATCTGTGGGATTGGTGATGGGATAGTCGGATTTGTCCATGTATTTGATACTTTCCCGGGTTGATTGCCATGGATTTGCGGGATATGGCATTA	12	33	Insertion	0.02	1	PFSVLTAGGWGSGWGFATILCLMWRLGG*	PFSVLTAGGWGSGWGFATILCLMWRRAVEIGTCW*	CCTTTCTCTGTGCTGACTGCGGGGGGATGGGGATCTGGGTGGGGGTTCGCTACGATTCTCTGCTTGATGTGGAGACTGGGCGGTTGAGACCGGAACTTGTTGGTGATAGATCTGCCTGTATGCTTCGTGTTGCATTGAATGGTGCTTAGATCTGTGGGATTGGTGATGGGATAGTCGGATTTGTCCATGTATTTGATACTTTCCCGGGTTGATTGCCATGGATTTGCGGGATATGGCATTA	CCTTTCTCTGTGCTGACTGCGGGGGGATGGGGATCTGGGTGGGGGTTCGCTACGATTCTCTGCTTGATGTGGAGACGGGCGGTTGAGATCGGAACTTGTTGGTGATAGATCTGCCTGTATGCTTCGTGTTGCATTGAATGGTGCTTAGATCTGTGGGATTGGTGATGGGATAGTCGGATTTGTCCATGTATTTGATACTTTCCCGGGTTGATTGCCATGGATTTGCGGGATATGGCATTA
CCTTTCTCTGTGCTGACTGCGGGGGGATGGGGATCTGGGTGGGGGTTCGCTACGATTCTCTGCTTGATGTGGAGACTgGGCGGTTGAGATCGGAACTTGTTGGTGATAGATCTGCCTGTATGCTTCGTGTTGCATTGAATGGTGCTTAGATCTGTGGGATCGGTGATGGGATAGTCGGATTTGTCCATGTATTTGATACTTTCCCGGGTTGATTGCCATGGATTTGCGGGATATGGCATTA	12	34	Insertion	0.02	1	PFSVLTAGGWGSGWGFATILCLMWRLGG*	PFSVLTAGGWGSGWGFATILCLMWRRAVEIGTCW*	CCTTTCTCTGTGCTGACTGCGGGGGGATGGGGATCTGGGTGGGGGTTCGCTACGATTCTCTGCTTGATGTGGAGACTGGGCGGTTGAGATCGGAACTTGTTGGTGATAGATCTGCCTGTATGCTTCGTGTTGCATTGAATGGTGCTTAGATCTGTGGGATCGGTGATGGGATAGTCGGATTTGTCCATGTATTTGATACTTTCCCGGGTTGATTGCCATGGATTTGCGGGATATGGCATTA	CCTTTCTCTGTGCTGACTGCGGGGGGATGGGGATCTGGGTGGGGGTTCGCTACGATTCTCTGCTTGATGTGGAGACGGGCGGTTGAGATCGGAACTTGTTGGTGATAGATCTGCCTGTATGCTTCGTGTTGCATTGAATGGTGCTTAGATCTGTGGGATTGGTGATGGGATAGTCGGATTTGTCCATGTATTTGATACTTTCCCGGGTTGATTGCCATGGATTTGCGGGATATGGCATTA
CCTTTCTCTGTGCTGACTGCGGGGGGATGGGGATCTGGGTGGGGGTTCGCTACGATTCTCTGCTTGATGTGGAGACTgGGCGGTTGAGATCGGAACTTGTTGGTGATAGATCTGCCTGTATGCTTCGTGTTGCATTGAATGGTGCTTAGATCTGTGGGATTGGTGATGGGATAGCCGGATTTGTCCATGTATTTGATACTTTCCCGGGTTGATTGCCATGGATTTGCGGGATATGGCATTA	12	33	Insertion	0.02	1	PFSVLTAGGWGSGWGFATILCLMWRLGG*	PFSVLTAGGWGSGWGFATILCLMWRRAVEIGTCW*	CCTTTCTCTGTGCTGACTGCGGGGGGATGGGGATCTGGGTGGGGGTTCGCTACGATTCTCTGCTTGATGTGGAGACTGGGCGGTTGAGATCGGAACTTGTTGGTGATAGATCTGCCTGTATGCTTCGTGTTGCATTGAATGGTGCTTAGATCTGTGGGATTGGTGATGGGATAGCCGGATTTGTCCATGTATTTGATACTTTCCCGGGTTGATTGCCATGGATTTGCGGGATATGGCATTA	CCTTTCTCTGTGCTGACTGCGGGGGGATGGGGATCTGGGTGGGGGTTCGCTACGATTCTCTGCTTGATGTGGAGACGGGCGGTTGAGATCGGAACTTGTTGGTGATAGATCTGCCTGTATGCTTCGTGTTGCATTGAATGGTGCTTAGATCTGTGGGATTGGTGATGGGATAGTCGGATTTGTCCATGTATTTGATACTTTCCCGGGTTGATTGCCATGGATTTGCGGGATATGGCATTA
CCTTTCTCTGTGCTGACTGCGGGGGGATGGGGATCTGGGTGGGGGTTCGCTACGATTCTCTGCTTGATGTGGAGACTgGGCGGTTGAGATCGGAACTTGTTGGTGATAGATCTGCCTGTATGCTTCGTGTTGCATTGAATGGTGCTTAGATCTGTGGGATTGGTGATGGGATAGTCGGATCTGTCCATGTATTTGATACTTTCCCGGGTTGATTGCCATGGATTTGCGGGATATGGCATTA	12	33	Insertion	0.02	1	PFSVLTAGGWGSGWGFATILCLMWRLGG*	PFSVLTAGGWGSGWGFATILCLMWRRAVEIGTCW*	CCTTTCTCTGTGCTGACTGCGGGGGGATGGGGATCTGGGTGGGGGTTCGCTACGATTCTCTGCTTGATGTGGAGACTGGGCGGTTGAGATCGGAACTTGTTGGTGATAGATCTGCCTGTATGCTTCGTGTTGCATTGAATGGTGCTTAGATCTGTGGGATTGGTGATGGGATAGTCGGATCTGTCCATGTATTTGATACTTTCCCGGGTTGATTGCCATGGATTTGCGGGATATGGCATTA	CCTTTCTCTGTGCTGACTGCGGGGGGATGGGGATCTGGGTGGGGGTTCGCTACGATTCTCTGCTTGATGTGGAGACGGGCGGTTGAGATCGGAACTTGTTGGTGATAGATCTGCCTGTATGCTTCGTGTTGCATTGAATGGTGCTTAGATCTGTGGGATTGGTGATGGGATAGTCGGATTTGTCCATGTATTTGATACTTTCCCGGGTTGATTGCCATGGATTTGCGGGATATGGCATTA
CCTTTCTCTGTGCTGACTGCGGGGGGATGGGGATCTGGGTGGGGGTTCGCTACGATTCTCTGCTTGATGTGGAGACTgGGCGGTTGAGATCGGAACTTGTTGGTGATAGATCTGCCTGTATGCTTCGTGTTGCATTGAATGGTGCTTAGATCTGTGGGATTGGTGATGGGATAGTCGGATTTGTCCATGTATTCGATACTTTCCCGGGTTGATTGCCATGGATTTGCGGGATATGGCATTA	12	33	Insertion	0.02	1	PFSVLTAGGWGSGWGFATILCLMWRLGG*	PFSVLTAGGWGSGWGFATILCLMWRRAVEIGTCW*	CCTTTCTCTGTGCTGACTGCGGGGGGATGGGGATCTGGGTGGGGGTTCGCTACGATTCTCTGCTTGATGTGGAGACTGGGCGGTTGAGATCGGAACTTGTTGGTGATAGATCTGCCTGTATGCTTCGTGTTGCATTGAATGGTGCTTAGATCTGTGGGATTGGTGATGGGATAGTCGGATTTGTCCATGTATTCGATACTTTCCCGGGTTGATTGCCATGGATTTGCGGGATATGGCATTA	CCTTTCTCTGTGCTGACTGCGGGGGGATGGGGATCTGGGTGGGGGTTCGCTACGATTCTCTGCTTGATGTGGAGACGGGCGGTTGAGATCGGAACTTGTTGGTGATAGATCTGCCTGTATGCTTCGTGTTGCATTGAATGGTGCTTAGATCTGTGGGATTGGTGATGGGATAGTCGGATTTGTCCATGTATTTGATACTTTCCCGGGTTGATTGCCATGGATTTGCGGGATATGGCATTA
CCTTTCTCTGTGCTGACTGCGGGGGGATGGGGATCTGGGTGGGGGTTCGCTACGATTCTCTGCTTGATGTGGAGACTgGGCGGTTGAGATCGGAACTTGTTGGTGATAGATCTGCCTGTATGCTTCGTGTTGCATTGAATGGTGCTTAGATCTGTGGGATTGGTGATGGGATAGTCGGATTTGTCCATGTATTTGATACCTTCCCGGGTTGATTGCCATGGATTTGCGGGATATGGCATTA	12	33	Insertion	0.02	1	PFSVLTAGGWGSGWGFATILCLMWRLGG*	PFSVLTAGGWGSGWGFATILCLMWRRAVEIGTCW*	CCTTTCTCTGTGCTGACTGCGGGGGGATGGGGATCTGGGTGGGGGTTCGCTACGATTCTCTGCTTGATGTGGAGACTGGGCGGTTGAGATCGGAACTTGTTGGTGATAGATCTGCCTGTATGCTTCGTGTTGCATTGAATGGTGCTTAGATCTGTGGGATTGGTGATGGGATAGTCGGATTTGTCCATGTATTTGATACCTTCCCGGGTTGATTGCCATGGATTTGCGGGATATGGCATTA	CCTTTCTCTGTGCTGACTGCGGGGGGATGGGGATCTGGGTGGGGGTTCGCTACGATTCTCTGCTTGATGTGGAGACGGGCGGTTGAGATCGGAACTTGTTGGTGATAGATCTGCCTGTATGCTTCGTGTTGCATTGAATGGTGCTTAGATCTGTGGGATTGGTGATGGGATAGTCGGATTTGTCCATGTATTTGATACTTTCCCGGGTTGATTGCCATGGATTTGCGGGATATGGCATTA
CCTTTCTCTGTGCTGACTGCGGGGGGATGGGGATCTGGGTGGGGGTTCGCTACGATTCTCTGCTTGATGTGGAGACTgGGCGGTTGAGATCGGAACTTGTTGGTGATAGATCTGCCTGTATGCTTCGTGTTGCATTGAATGGTGCTTAGATCTGTGGGATTGGTGATGGGATAGTCGGATTTGTCCATGTATTTGATACTTTCCCGGGTTGACTGCCATGGATTTGCGGGATATGGCATTA	12	33	Insertion	0.02	1	PFSVLTAGGWGSGWGFATILCLMWRLGG*	PFSVLTAGGWGSGWGFATILCLMWRRAVEIGTCW*	CCTTTCTCTGTGCTGACTGCGGGGGGATGGGGATCTGGGTGGGGGTTCGCTACGATTCTCTGCTTGATGTGGAGACTGGGCGGTTGAGATCGGAACTTGTTGGTGATAGATCTGCCTGTATGCTTCGTGTTGCATTGAATGGTGCTTAGATCTGTGGGATTGGTGATGGGATAGTCGGATTTGTCCATGTATTTGATACTTTCCCGGGTTGACTGCCATGGATTTGCGGGATATGGCATTA	CCTTTCTCTGTGCTGACTGCGGGGGGATGGGGATCTGGGTGGGGGTTCGCTACGATTCTCTGCTTGATGTGGAGACGGGCGGTTGAGATCGGAACTTGTTGGTGATAGATCTGCCTGTATGCTTCGTGTTGCATTGAATGGTGCTTAGATCTGTGGGATTGGTGATGGGATAGTCGGATTTGTCCATGTATTTGATACTTTCCCGGGTTGATTGCCATGGATTTGCGGGATATGGCATTA
CCTTTCTCTGTGCTGACTGCGGGGGGATGGGGATCTGGGTGGGGGTTCGCTACGATTCTCTGCTTGATGTGGAGACTgGGCGGTTGAGATCGGAACTTGTTGGTGATAGATCTGCCTGTATGCTTCGTGTTGCATTGAATGGTGCTTAGATCTGTGGGATTGGTGATGGGATAGTCGGATTTGTCCGTGTATTTGATACTTTCCCGGGTTGATTGCCATGGATTTGCGGGATATGGCATTA	12	33	Insertion	0.02	1	PFSVLTAGGWGSGWGFATILCLMWRLGG*	PFSVLTAGGWGSGWGFATILCLMWRRAVEIGTCW*	CCTTTCTCTGTGCTGACTGCGGGGGGATGGGGATCTGGGTGGGGGTTCGCTACGATTCTCTGCTTGATGTGGAGACTGGGCGGTTGAGATCGGAACTTGTTGGTGATAGATCTGCCTGTATGCTTCGTGTTGCATTGAATGGTGCTTAGATCTGTGGGATTGGTGATGGGATAGTCGGATTTGTCCGTGTATTTGATACTTTCCCGGGTTGATTGCCATGGATTTGCGGGATATGGCATTA	CCTTTCTCTGTGCTGACTGCGGGGGGATGGGGATCTGGGTGGGGGTTCGCTACGATTCTCTGCTTGATGTGGAGACGGGCGGTTGAGATCGGAACTTGTTGGTGATAGATCTGCCTGTATGCTTCGTGTTGCATTGAATGGTGCTTAGATCTGTGGGATTGGTGATGGGATAGTCGGATTTGTCCATGTATTTGATACTTTCCCGGGTTGATTGCCATGGATTTGCGGGATATGGCATTA
CCTTTCTCTGTGCTGACTGCGGGGGGATGGGGATCTGGGTGGGGGTTCGCTGCGATTCTCTGCTTGATGTGGAGACTgGGCGGTTGAGATCGGAACTTGTTGGTGATAGATCTGCCTGTATGCTTCGTGTTGCATTGAATGGTGCTTAGATCTGTGGGATTGGTGATGGGATAGTCGGATTTGTCCATGTATTTGATACTTTCCCGGGTTGATTGCCATGGATTTGCGGGATATGGCATTA	12	34	Insertion	0.02	1	PFSVLTAGGWGSGWGFAAILCLMWRLGG*	PFSVLTAGGWGSGWGFATILCLMWRRAVEIGTCW*	CCTTTCTCTGTGCTGACTGCGGGGGGATGGGGATCTGGGTGGGGGTTCGCTGCGATTCTCTGCTTGATGTGGAGACTGGGCGGTTGAGATCGGAACTTGTTGGTGATAGATCTGCCTGTATGCTTCGTGTTGCATTGAATGGTGCTTAGATCTGTGGGATTGGTGATGGGATAGTCGGATTTGTCCATGTATTTGATACTTTCCCGGGTTGATTGCCATGGATTTGCGGGATATGGCATTA	CCTTTCTCTGTGCTGACTGCGGGGGGATGGGGATCTGGGTGGGGGTTCGCTACGATTCTCTGCTTGATGTGGAGACGGGCGGTTGAGATCGGAACTTGTTGGTGATAGATCTGCCTGTATGCTTCGTGTTGCATTGAATGGTGCTTAGATCTGTGGGATTGGTGATGGGATAGTCGGATTTGTCCATGTATTTGATACTTTCCCGGGTTGATTGCCATGGATTTGCGGGATATGGCATTA
CCTTTCTCTGTGCTGACTGCGGGGGGATGGGGGTCTGGGTGGGGGTTCGCTACGATTCTCTGCTTGATGTGGAGACTgGGCGGTTGAGATCGGAACTTGTTGGTGATAGATCTGCCTGTATGCTTCGTGTTGCATTGAATGGTGCTTAGATCTGTGGGATTGGTGATGGGATAGTCGGATTTGTCCATGTATTTGATACTTTCCCGGGTTGATTGCCATGGATTTGCGGGATATGGCATTA	12	33	Insertion	0.02	1	PFSVLTAGGWGSGWGFATILCLMWRLGG*	PFSVLTAGGWGSGWGFATILCLMWRRAVEIGTCW*	CCTTTCTCTGTGCTGACTGCGGGGGGATGGGGGTCTGGGTGGGGGTTCGCTACGATTCTCTGCTTGATGTGGAGACTGGGCGGTTGAGATCGGAACTTGTTGGTGATAGATCTGCCTGTATGCTTCGTGTTGCATTGAATGGTGCTTAGATCTGTGGGATTGGTGATGGGATAGTCGGATTTGTCCATGTATTTGATACTTTCCCGGGTTGATTGCCATGGATTTGCGGGATATGGCATTA	CCTTTCTCTGTGCTGACTGCGGGGGGATGGGGATCTGGGTGGGGGTTCGCTACGATTCTCTGCTTGATGTGGAGACGGGCGGTTGAGATCGGAACTTGTTGGTGATAGATCTGCCTGTATGCTTCGTGTTGCATTGAATGGTGCTTAGATCTGTGGGATTGGTGATGGGATAGTCGGATTTGTCCATGTATTTGATACTTTCCCGGGTTGATTGCCATGGATTTGCGGGATATGGCATTA
CCTTTCTCTGTGC-GACTGCGGGGGGATGGGGATCTGGGTGGGGGTTCGCTACGATTCTCTGCTTGATGTGGAGACGGGCGGTTGAGATCGGAACTTGTTGGTGATAGATCTGCCTGTATGCTTCGTGTTGCATTGAATGGTGCTTAGATCTGTGGGATTGGTGATGGGATAGTCGGATTTGTCCATGTATTTGATACTTTCCCGGGTTGATTGCCATGGATTTGCGGGATATGGCATTA	11	34	Deletion	0.02	-1	PFSVRLRGDGDLGGGSLRFSA*	PFSVLTAGGWGSGWGFATILCLMWRRAVEIGTCW*	CCTTTCTCTGTGC-GACTGCGGGGGGATGGGGATCTGGGTGGGGGTTCGCTACGATTCTCTGCTTGATGTGGAGACGGGCGGTTGAGATCGGAACTTGTTGGTGATAGATCTGCCTGTATGCTTCGTGTTGCATTGAATGGTGCTTAGATCTGTGGGATTGGTGATGGGATAGTCGGATTTGTCCATGTATTTGATACTTTCCCGGGTTGATTGCCATGGATTTGCGGGATATGGCATTA	CCTTTCTCTGTGCTGACTGCGGGGGGATGGGGATCTGGGTGGGGGTTCGCTACGATTCTCTGCTTGATGTGGAGACGGGCGGTTGAGATCGGAACTTGTTGGTGATAGATCTGCCTGTATGCTTCGTGTTGCATTGAATGGTGCTTAGATCTGTGGGATTGGTGATGGGATAGTCGGATTTGTCCATGTATTTGATACTTTCCCGGGTTGATTGCCATGGATTTGCGGGATATGGCATTA
CCTTTCTCTGTGCTGACTGCGGGGGGATGGGGATCTGGGTGGGGGTCCGCTACGATTCTCTGCTTGATGTGGAGACTgGGCGGTTGAGATCGGAACTTGTTGGTGATAGATCTGCCTGTATGCTTCGTGTTGCATTGAATGGTGCTTAGATCTGTGGGATTGGTGATGGGATAGTCGGATTTGTCCATGTATTTGATACTTTCCCGGGTTGATTGCCATGGATTTGCGGGATATGGCATTA	11	33	Insertion	0.02	1	PFSVLTAGGWGSGWGSATILCLMWRLGG*	PFSVLTAGGWGSGWGFATILCLMWRRAVEIGTCW*	CCTTTCTCTGTGCTGACTGCGGGGGGATGGGGATCTGGGTGGGGGTCCGCTACGATTCTCTGCTTGATGTGGAGACTGGGCGGTTGAGATCGGAACTTGTTGGTGATAGATCTGCCTGTATGCTTCGTGTTGCATTGAATGGTGCTTAGATCTGTGGGATTGGTGATGGGATAGTCGGATTTGTCCATGTATTTGATACTTTCCCGGGTTGATTGCCATGGATTTGCGGGATATGGCATTA	CCTTTCTCTGTGCTGACTGCGGGGGGATGGGGATCTGGGTGGGGGTTCGCTACGATTCTCTGCTTGATGTGGAGACGGGCGGTTGAGATCGGAACTTGTTGGTGATAGATCTGCCTGTATGCTTCGTGTTGCATTGAATGGTGCTTAGATCTGTGGGATTGGTGATGGGATAGTCGGATTTGTCCATGTATTTGATACTTTCCCGGGTTGATTGCCATGGATTTGCGGGATATGGCATTA
CCTTTCTCTGTGCTGACTGCGGGGGGATGGGGATCTGGGTGGGGGTTCGCCACGATTCTCTGCTTGATGTGG---CGGGCGGTTGAGATCGGAACTTGTTGGTGATAGATCTGCCTGTATGCTTCGTGTTGCATTGAATGGTGCTTAGATCTGTGGGATTGGTGATGGGATAGTCGGATTTGTCCATGTATTTGATACTTTCCCGGGTTGATTGCCATGGATTTGCGGGATATGGCATTA	11	31	Deletion	0.02	-3	PFSVLTAGGWGSGWGFATILCLMWRAVEIGTCW*	PFSVLTAGGWGSGWGFATILCLMWRRAVEIGTCW*	CCTTTCTCTGTGCTGACTGCGGGGGGATGGGGATCTGGGTGGGGGTTCGCCACGATTCTCTGCTTGATGTGG---CGGGCGGTTGAGATCGGAACTTGTTGGTGATAGATCTGCCTGTATGCTTCGTGTTGCATTGAATGGTGCTTAGATCTGTGGGATTGGTGATGGGATAGTCGGATTTGTCCATGTATTTGATACTTTCCCGGGTTGATTGCCATGGATTTGCGGGATATGGCATTA	CCTTTCTCTGTGCTGACTGCGGGGGGATGGGGATCTGGGTGGGGGTTCGCTACGATTCTCTGCTTGATGTGGAGACGGGCGGTTGAGATCGGAACTTGTTGGTGATAGATCTGCCTGTATGCTTCGTGTTGCATTGAATGGTGCTTAGATCTGTGGGATTGGTGATGGGATAGTCGGATTTGTCCATGTATTTGATACTTTCCCGGGTTGATTGCCATGGATTTGCGGGATATGGCATTA
CCTTTCTCTGTGCTGACTGCGGGGGGATGGGGATCTGGGTGGGGGTTCGCCACGATTCTCTGCTTGATGTGGAGACGGGCGGTTGAGATCGGAACTTGTTGGTGATAGATCTGCCTGTATGCTTCGTGTTGCATTGAATGGTGCTTAGATCTGTGGGATTGGTGATGGGATAGTCGGATTTGTCCATGTATTTGATACTTTCCCGGGTTGATTGCCATGGATTTGCGGGATATGGCATTA	11	34	1 Base Change	0.02	0	PFSVLTAGGWGSGWGFATILCLMWRRAVEIGTCW*	PFSVLTAGGWGSGWGFATILCLMWRRAVEIGTCW*	CCTTTCTCTGTGCTGACTGCGGGGGGATGGGGATCTGGGTGGGGGTTCGCCACGATTCTCTGCTTGATGTGGAGACGGGCGGTTGAGATCGGAACTTGTTGGTGATAGATCTGCCTGTATGCTTCGTGTTGCATTGAATGGTGCTTAGATCTGTGGGATTGGTGATGGGATAGTCGGATTTGTCCATGTATTTGATACTTTCCCGGGTTGATTGCCATGGATTTGCGGGATATGGCATTA	CCTTTCTCTGTGCTGACTGCGGGGGGATGGGGATCTGGGTGGGGGTTCGCTACGATTCTCTGCTTGATGTGGAGACGGGCGGTTGAGATCGGAACTTGTTGGTGATAGATCTGCCTGTATGCTTCGTGTTGCATTGAATGGTGCTTAGATCTGTGGGATTGGTGATGGGATAGTCGGATTTGTCCATGTATTTGATACTTTCCCGGGTTGATTGCCATGGATTTGCGGGATATGGCATTA
CCTTTCTCTGTGCTGACTGCGGGGGGATGGGGATCTGGGTGGGGGTTCGCTACGATTCTCT-----------------GCGGTTGAGATCGGAACTTGTTGGTGATAGATCTGCCTGTATGCTTCGTGTTGCATTGAATGGTGCTTAGATCTGTGGGATTGGTGATGGGATAGTCGGATTTGTCCATGTATTTGATACTTTCCCGGGTTGATTGCCATGGATTTGCGGGATATGGCATTA	11	34	Deletion	0.02	-17	PFSVLTAGGWGSGWGFATILCG*	PFSVLTAGGWGSGWGFATILCLMWRRAVEIGTCW*	CCTTTCTCTGTGCTGACTGCGGGGGGATGGGGATCTGGGTGGGGGTTCGCTACGATTCTCT-----------------GCGGTTGAGATCGGAACTTGTTGGTGATAGATCTGCCTGTATGCTTCGTGTTGCATTGAATGGTGCTTAGATCTGTGGGATTGGTGATGGGATAGTCGGATTTGTCCATGTATTTGATACTTTCCCGGGTTGATTGCCATGGATTTGCGGGATATGGCATTA	CCTTTCTCTGTGCTGACTGCGGGGGGATGGGGATCTGGGTGGGGGTTCGCTACGATTCTCTGCTTGATGTGGAGACGGGCGGTTGAGATCGGAACTTGTTGGTGATAGATCTGCCTGTATGCTTCGTGTTGCATTGAATGGTGCTTAGATCTGTGGGATTGGTGATGGGATAGTCGGATTTGTCCATGTATTTGATACTTTCCCGGGTTGATTGCCATGGATTTGCGGGATATGGCATTA
CCTTTCTCTGTGCTGACTGCGGGGGGATGGGGATCTGGGTGGGGGTTCGCTACGATTCTCTGCCTGATGTGG---CGGGCGGTTGAGATCGGAACTTGTTGGTGATAGATCTGCCTGTATGCTTCGTGTTGCATTGAATGGTGCTTAGATCTGTGGGATTGGTGATGGGATAGTCGGATTTGTCCATGTATTTGATACTTTCCCGGGTTGATTGCCATGGATTTGCGGGATATGGCATTA	11	30	Deletion	0.02	-3	PFSVLTAGGWGSGWGFATILCLMWRAVEIGTCW*	PFSVLTAGGWGSGWGFATILCLMWRRAVEIGTCW*	CCTTTCTCTGTGCTGACTGCGGGGGGATGGGGATCTGGGTGGGGGTTCGCTACGATTCTCTGCCTGATGTGG---CGGGCGGTTGAGATCGGAACTTGTTGGTGATAGATCTGCCTGTATGCTTCGTGTTGCATTGAATGGTGCTTAGATCTGTGGGATTGGTGATGGGATAGTCGGATTTGTCCATGTATTTGATACTTTCCCGGGTTGATTGCCATGGATTTGCGGGATATGGCATTA	CCTTTCTCTGTGCTGACTGCGGGGGGATGGGGATCTGGGTGGGGGTTCGCTACGATTCTCTGCTTGATGTGGAGACGGGCGGTTGAGATCGGAACTTGTTGGTGATAGATCTGCCTGTATGCTTCGTGTTGCATTGAATGGTGCTTAGATCTGTGGGATTGGTGATGGGATAGTCGGATTTGTCCATGTATTTGATACTTTCCCGGGTTGATTGCCATGGATTTGCGGGATATGGCATTA
CCTTTCTCTGTGCTGACTGCGGGGGGATGGGGATCTGGGTGGGGGTTCGCTACGATTCTCTGCTTGACGTGG---CGGGCGGTTGAGATCGGAACTTGTTGGTGATAGATCTGCCTGTATGCTTCGTGTTGCATTGAATGGTGCTTAGATCTGTGGGATTGGTGATGGGATAGTCGGATTTGTCCATGTATTTGATACTTTCCCGGGTTGATTGCCATGGATTTGCGGGATATGGCATTA	11	32	Deletion	0.02	-3	PFSVLTAGGWGSGWGFATILCLTWRAVEIGTCW*	PFSVLTAGGWGSGWGFATILCLMWRRAVEIGTCW*	CCTTTCTCTGTGCTGACTGCGGGGGGATGGGGATCTGGGTGGGGGTTCGCTACGATTCTCTGCTTGACGTGG---CGGGCGGTTGAGATCGGAACTTGTTGGTGATAGATCTGCCTGTATGCTTCGTGTTGCATTGAATGGTGCTTAGATCTGTGGGATTGGTGATGGGATAGTCGGATTTGTCCATGTATTTGATACTTTCCCGGGTTGATTGCCATGGATTTGCGGGATATGGCATTA	CCTTTCTCTGTGCTGACTGCGGGGGGATGGGGATCTGGGTGGGGGTTCGCTACGATTCTCTGCTTGATGTGGAGACGGGCGGTTGAGATCGGAACTTGTTGGTGATAGATCTGCCTGTATGCTTCGTGTTGCATTGAATGGTGCTTAGATCTGTGGGATTGGTGATGGGATAGTCGGATTTGTCCATGTATTTGATACTTTCCCGGGTTGATTGCCATGGATTTGCGGGATATGGCATTA
CCTTTCTCTGTGCTGACTGCGGGGGGATGGGGATCTGGGTGGGGGTTCGCTACGATTCTCTGCTTGAT--------GGGCGGTTGAGATCGGAACTTGTTGGTGATAGATCTGCCTGTATGCTTCGTGTTGCATTGAATGGTGCTTAGATCTGTGGGATTGGTGATGGGATAGTCGGATTTGTCCATGTATTTGATACTTTCCCGGGTTGATTGCCATGGATTTGCGGGATATGGCATTA	11	33	Deletion	0.02	-8	PFSVLTAGGWGSGWGFATILCLMGG*	PFSVLTAGGWGSGWGFATILCLMWRRAVEIGTCW*	CCTTTCTCTGTGCTGACTGCGGGGGGATGGGGATCTGGGTGGGGGTTCGCTACGATTCTCTGCTTGAT--------GGGCGGTTGAGATCGGAACTTGTTGGTGATAGATCTGCCTGTATGCTTCGTGTTGCATTGAATGGTGCTTAGATCTGTGGGATTGGTGATGGGATAGTCGGATTTGTCCATGTATTTGATACTTTCCCGGGTTGATTGCCATGGATTTGCGGGATATGGCATTA	CCTTTCTCTGTGCTGACTGCGGGGGGATGGGGATCTGGGTGGGGGTTCGCTACGATTCTCTGCTTGATGTGGAGACGGGCGGTTGAGATCGGAACTTGTTGGTGATAGATCTGCCTGTATGCTTCGTGTTGCATTGAATGGTGCTTAGATCTGTGGGATTGGTGATGGGATAGTCGGATTTGTCCATGTATTTGATACTTTCCCGGGTTGATTGCCATGGATTTGCGGGATATGGCATTA
CCTTTCTCTGTGCTGACTGCGGGGGGATGGGGATCTGGGTGGGGGTTCGCTACGATTCTCTGCTTGATGCGGAGACTgGGCGGTTGAGATCGGAACTTGTTGGTGATAGATCTGCCTGTATGCTTCGTGTTGCATTGAATGGTGCTTAGATCTGTGGGATTGGTGATGGGATAGTCGGATTTGTCCATGTATTTGATACTTTCCCGGGTTGATTGCCATGGATTTGCGGGATATGGCATTA	11	33	Insertion	0.02	1	PFSVLTAGGWGSGWGFATILCLMRRLGG*	PFSVLTAGGWGSGWGFATILCLMWRRAVEIGTCW*	CCTTTCTCTGTGCTGACTGCGGGGGGATGGGGATCTGGGTGGGGGTTCGCTACGATTCTCTGCTTGATGCGGAGACTGGGCGGTTGAGATCGGAACTTGTTGGTGATAGATCTGCCTGTATGCTTCGTGTTGCATTGAATGGTGCTTAGATCTGTGGGATTGGTGATGGGATAGTCGGATTTGTCCATGTATTTGATACTTTCCCGGGTTGATTGCCATGGATTTGCGGGATATGGCATTA	CCTTTCTCTGTGCTGACTGCGGGGGGATGGGGATCTGGGTGGGGGTTCGCTACGATTCTCTGCTTGATGTGGAGACGGGCGGTTGAGATCGGAACTTGTTGGTGATAGATCTGCCTGTATGCTTCGTGTTGCATTGAATGGTGCTTAGATCTGTGGGATTGGTGATGGGATAGTCGGATTTGTCCATGTATTTGATACTTTCCCGGGTTGATTGCCATGGATTTGCGGGATATGGCATTA
CCTTTCTCTGTGCTGACTGCGGGGGGATGGGGATCTGGGTGGGGGTTCGCTACGATTCTCTGCTTGATGTGG---CGGGCGGTTGAGATCGGAACTTGTTGGTGATAGATCTGCCCGTATGCTTCGTGTTGCATTGAATGGTGCTTAGATCTGTGGGATTGGTGATGGGATAGTCGGATTTGTCCATGTATTTGATACTTTCCCGGGTTGATTGCCATGGATTTGCGGGATATGGCATTA	11	29	Deletion	0.02	-3	PFSVLTAGGWGSGWGFATILCLMWRAVEIGTCW*	PFSVLTAGGWGSGWGFATILCLMWRRAVEIGTCW*	CCTTTCTCTGTGCTGACTGCGGGGGGATGGGGATCTGGGTGGGGGTTCGCTACGATTCTCTGCTTGATGTGG---CGGGCGGTTGAGATCGGAACTTGTTGGTGATAGATCTGCCCGTATGCTTCGTGTTGCATTGAATGGTGCTTAGATCTGTGGGATTGGTGATGGGATAGTCGGATTTGTCCATGTATTTGATACTTTCCCGGGTTGATTGCCATGGATTTGCGGGATATGGCATTA	CCTTTCTCTGTGCTGACTGCGGGGGGATGGGGATCTGGGTGGGGGTTCGCTACGATTCTCTGCTTGATGTGGAGACGGGCGGTTGAGATCGGAACTTGTTGGTGATAGATCTGCCTGTATGCTTCGTGTTGCATTGAATGGTGCTTAGATCTGTGGGATTGGTGATGGGATAGTCGGATTTGTCCATGTATTTGATACTTTCCCGGGTTGATTGCCATGGATTTGCGGGATATGGCATTA
CCTTTCTCTGTGCTGACTGCGGGGGGATGGGGATCTGGGTGGGGGTTCGCTACGATTCTCTGCTTGATGTGG---CGGGCGGTTGAGATCGGAACTTGTTGGTGATAGATCTGCCTGTATGCTTCGTGTTGCATTGAATGGTGCCTAGATCTGTGGGATTGGTGATGGGATAGTCGGATTTGTCCATGTATTTGATACTTTCCCGGGTTGATTGCCATGGATTTGCGGGATATGGCATTA	11	29	Deletion	0.02	-3	PFSVLTAGGWGSGWGFATILCLMWRAVEIGTCW*	PFSVLTAGGWGSGWGFATILCLMWRRAVEIGTCW*	CCTTTCTCTGTGCTGACTGCGGGGGGATGGGGATCTGGGTGGGGGTTCGCTACGATTCTCTGCTTGATGTGG---CGGGCGGTTGAGATCGGAACTTGTTGGTGATAGATCTGCCTGTATGCTTCGTGTTGCATTGAATGGTGCCTAGATCTGTGGGATTGGTGATGGGATAGTCGGATTTGTCCATGTATTTGATACTTTCCCGGGTTGATTGCCATGGATTTGCGGGATATGGCATTA	CCTTTCTCTGTGCTGACTGCGGGGGGATGGGGATCTGGGTGGGGGTTCGCTACGATTCTCTGCTTGATGTGGAGACGGGCGGTTGAGATCGGAACTTGTTGGTGATAGATCTGCCTGTATGCTTCGTGTTGCATTGAATGGTGCTTAGATCTGTGGGATTGGTGATGGGATAGTCGGATTTGTCCATGTATTTGATACTTTCCCGGGTTGATTGCCATGGATTTGCGGGATATGGCATTA
CCTTTCTCTGTGCTGACTGCGGGGGGATGGGGATCTGGGTGGGGGTTCGCTACGATTCTCTGCTTGATGTGG---CGGGCGGTTGAGATCGGAACTTGTTGGTGATAGATCTGCCTGTATGCTTCGTGTTGCATTGAATGGTGCTTAGACCTGTGGGATTGGTGATGGGATAGTCGGATTTGTCCATGTATTTGATACTTTCCCGGGTTGATTGCCATGGATTTGCGGGATATGGCATTA	11	28	Deletion	0.02	-3	PFSVLTAGGWGSGWGFATILCLMWRAVEIGTCW*	PFSVLTAGGWGSGWGFATILCLMWRRAVEIGTCW*	CCTTTCTCTGTGCTGACTGCGGGGGGATGGGGATCTGGGTGGGGGTTCGCTACGATTCTCTGCTTGATGTGG---CGGGCGGTTGAGATCGGAACTTGTTGGTGATAGATCTGCCTGTATGCTTCGTGTTGCATTGAATGGTGCTTAGACCTGTGGGATTGGTGATGGGATAGTCGGATTTGTCCATGTATTTGATACTTTCCCGGGTTGATTGCCATGGATTTGCGGGATATGGCATTA	CCTTTCTCTGTGCTGACTGCGGGGGGATGGGGATCTGGGTGGGGGTTCGCTACGATTCTCTGCTTGATGTGGAGACGGGCGGTTGAGATCGGAACTTGTTGGTGATAGATCTGCCTGTATGCTTCGTGTTGCATTGAATGGTGCTTAGATCTGTGGGATTGGTGATGGGATAGTCGGATTTGTCCATGTATTTGATACTTTCCCGGGTTGATTGCCATGGATTTGCGGGATATGGCATTA
CCTTTCTCTGTGCTGACTGCGGGGGGATGGGGATCTGGGTGGGGGTTCGCTACGATTCTCTGCTTGATGTGG---CGGGCGGTTGAGATCGGAACTTGTTGGTGATAGATCTGCCTGTATGCTTCGTGTTGCATTGAATGGTGCTTAGATCTGTGGGGTTGGTGATGGGATAGTCGGATTTGTCCATGTATTTGATACTTTCCCGGGTTGATTGCCATGGATTTGCGGGATATGGCATTA	11	29	Deletion	0.02	-3	PFSVLTAGGWGSGWGFATILCLMWRAVEIGTCW*	PFSVLTAGGWGSGWGFATILCLMWRRAVEIGTCW*	CCTTTCTCTGTGCTGACTGCGGGGGGATGGGGATCTGGGTGGGGGTTCGCTACGATTCTCTGCTTGATGTGG---CGGGCGGTTGAGATCGGAACTTGTTGGTGATAGATCTGCCTGTATGCTTCGTGTTGCATTGAATGGTGCTTAGATCTGTGGGGTTGGTGATGGGATAGTCGGATTTGTCCATGTATTTGATACTTTCCCGGGTTGATTGCCATGGATTTGCGGGATATGGCATTA	CCTTTCTCTGTGCTGACTGCGGGGGGATGGGGATCTGGGTGGGGGTTCGCTACGATTCTCTGCTTGATGTGGAGACGGGCGGTTGAGATCGGAACTTGTTGGTGATAGATCTGCCTGTATGCTTCGTGTTGCATTGAATGGTGCTTAGATCTGTGGGATTGGTGATGGGATAGTCGGATTTGTCCATGTATTTGATACTTTCCCGGGTTGATTGCCATGGATTTGCGGGATATGGCATTA
CCTTTCTCTGTGCTGACTGCGGGGGGATGGGGATCTGGGTGGGGGTTCGCTACGATTCTCTGCTTGATGTGG---CGGGCGGTTGAGATCGGAACTTGTTGGTGATAGATCTGTCTGTATGCTTCGTGTTGCATTGAATGGTGCTTAGATCTGTGGGATTGGTGATGGGATAGTCGGATTTGTCCATGTATTTGATACTTTCCCGGGTTGATTGCCATGGATTTGCGGGATATGGCATTA	11	30	Deletion	0.02	-3	PFSVLTAGGWGSGWGFATILCLMWRAVEIGTCW*	PFSVLTAGGWGSGWGFATILCLMWRRAVEIGTCW*	CCTTTCTCTGTGCTGACTGCGGGGGGATGGGGATCTGGGTGGGGGTTCGCTACGATTCTCTGCTTGATGTGG---CGGGCGGTTGAGATCGGAACTTGTTGGTGATAGATCTGTCTGTATGCTTCGTGTTGCATTGAATGGTGCTTAGATCTGTGGGATTGGTGATGGGATAGTCGGATTTGTCCATGTATTTGATACTTTCCCGGGTTGATTGCCATGGATTTGCGGGATATGGCATTA	CCTTTCTCTGTGCTGACTGCGGGGGGATGGGGATCTGGGTGGGGGTTCGCTACGATTCTCTGCTTGATGTGGAGACGGGCGGTTGAGATCGGAACTTGTTGGTGATAGATCTGCCTGTATGCTTCGTGTTGCATTGAATGGTGCTTAGATCTGTGGGATTGGTGATGGGATAGTCGGATTTGTCCATGTATTTGATACTTTCCCGGGTTGATTGCCATGGATTTGCGGGATATGGCATTA
CCTTTCTCTGTGCTGACTGCGGGGGGATGGGGATCTGGGTGGGGGTTCGCTACGATTCTCTGCTTGATGTGGAGACcGGGCGGTTGAGATCGGAACTTGTTGGTGATAGATCTGCCTGTATGCTTCGTGCTGCATTGAATGGTGCTTAGATCTGTGGGATTGGTGATGGGATAGTCGGATTTGTCCATGTATTTGATACTTTCCCGGGTTGATTGCCATGGATTTGCGGGATATGGCATTA	11	32	Insertion	0.02	1	PFSVLTAGGWGSGWGFATILCLMWRPGG*	PFSVLTAGGWGSGWGFATILCLMWRRAVEIGTCW*	CCTTTCTCTGTGCTGACTGCGGGGGGATGGGGATCTGGGTGGGGGTTCGCTACGATTCTCTGCTTGATGTGGAGACCGGGCGGTTGAGATCGGAACTTGTTGGTGATAGATCTGCCTGTATGCTTCGTGCTGCATTGAATGGTGCTTAGATCTGTGGGATTGGTGATGGGATAGTCGGATTTGTCCATGTATTTGATACTTTCCCGGGTTGATTGCCATGGATTTGCGGGATATGGCATTA	CCTTTCTCTGTGCTGACTGCGGGGGGATGGGGATCTGGGTGGGGGTTCGCTACGATTCTCTGCTTGATGTGGAGACGGGCGGTTGAGATCGGAACTTGTTGGTGATAGATCTGCCTGTATGCTTCGTGTTGCATTGAATGGTGCTTAGATCTGTGGGATTGGTGATGGGATAGTCGGATTTGTCCATGTATTTGATACTTTCCCGGGTTGATTGCCATGGATTTGCGGGATATGGCATTA
CCTTTCTCTGTGCTGACTGCGGGGGGATGGGGATCTGGGTGGGGGTTCGCTACGATTCTCTGCTTGATGTGGAGACcGGGCGGTTGAGATCGGAACTTGTTGGTGATAGATCTGCCTGTATGCTTCGTGTCGCATTGAATGGTGCTTAGATCTGTGGGATTGGTGATGGGATAGTCGGATTTGTCCATGTATTTGATACTTTCCCGGGTTGATTGCCATGGATTTGCGGGATATGGCATTA	11	33	Insertion	0.02	1	PFSVLTAGGWGSGWGFATILCLMWRPGG*	PFSVLTAGGWGSGWGFATILCLMWRRAVEIGTCW*	CCTTTCTCTGTGCTGACTGCGGGGGGATGGGGATCTGGGTGGGGGTTCGCTACGATTCTCTGCTTGATGTGGAGACCGGGCGGTTGAGATCGGAACTTGTTGGTGATAGATCTGCCTGTATGCTTCGTGTCGCATTGAATGGTGCTTAGATCTGTGGGATTGGTGATGGGATAGTCGGATTTGTCCATGTATTTGATACTTTCCCGGGTTGATTGCCATGGATTTGCGGGATATGGCATTA	CCTTTCTCTGTGCTGACTGCGGGGGGATGGGGATCTGGGTGGGGGTTCGCTACGATTCTCTGCTTGATGTGGAGACGGGCGGTTGAGATCGGAACTTGTTGGTGATAGATCTGCCTGTATGCTTCGTGTTGCATTGAATGGTGCTTAGATCTGTGGGATTGGTGATGGGATAGTCGGATTTGTCCATGTATTTGATACTTTCCCGGGTTGATTGCCATGGATTTGCGGGATATGGCATTA
CCTTTCTCTGTGCTGACTGCGGGGGGATGGGGATCTGGGTGGGGGTTCGCTACGATTCTCTGCTTGATGTGGAGACcGGGCGGTTGAGATCGGAACTTGTTGGTGATAGATCTGCCTGTATGCTTCGTGTTGCATTGAATGGTGCTTAGATCCGTGGGATTGGTGATGGGATAGTCGGATTTGTCCATGTATTTGATACTTTCCCGGGTTGATTGCCATGGATTTGCGGGATATGGCATTA	11	32	Insertion	0.02	1	PFSVLTAGGWGSGWGFATILCLMWRPGG*	PFSVLTAGGWGSGWGFATILCLMWRRAVEIGTCW*	CCTTTCTCTGTGCTGACTGCGGGGGGATGGGGATCTGGGTGGGGGTTCGCTACGATTCTCTGCTTGATGTGGAGACCGGGCGGTTGAGATCGGAACTTGTTGGTGATAGATCTGCCTGTATGCTTCGTGTTGCATTGAATGGTGCTTAGATCCGTGGGATTGGTGATGGGATAGTCGGATTTGTCCATGTATTTGATACTTTCCCGGGTTGATTGCCATGGATTTGCGGGATATGGCATTA	CCTTTCTCTGTGCTGACTGCGGGGGGATGGGGATCTGGGTGGGGGTTCGCTACGATTCTCTGCTTGATGTGGAGACGGGCGGTTGAGATCGGAACTTGTTGGTGATAGATCTGCCTGTATGCTTCGTGTTGCATTGAATGGTGCTTAGATCTGTGGGATTGGTGATGGGATAGTCGGATTTGTCCATGTATTTGATACTTTCCCGGGTTGATTGCCATGGATTTGCGGGATATGGCATTA
CCTTTCTCTGTGCTGACTGCGGGGGGATGGGGATCTGGGTGGGGGTTCGCTACGATTCTCTGCTTGATGTGGAGACcGGGCGGTTGAGATCGGAACTTGTTGGTGATAGATCTGCCTGTATGCTTCGTGTTGCATTGAATGGTGCTTAGATCTGTGGGATTGGTGATGGGATGGTCGGATTTGTCCATGTATTTGATACTTTCCCGGGTTGATTGCCATGGATTTGCGGGATATGGCATTA	11	32	Insertion	0.02	1	PFSVLTAGGWGSGWGFATILCLMWRPGG*	PFSVLTAGGWGSGWGFATILCLMWRRAVEIGTCW*	CCTTTCTCTGTGCTGACTGCGGGGGGATGGGGATCTGGGTGGGGGTTCGCTACGATTCTCTGCTTGATGTGGAGACCGGGCGGTTGAGATCGGAACTTGTTGGTGATAGATCTGCCTGTATGCTTCGTGTTGCATTGAATGGTGCTTAGATCTGTGGGATTGGTGATGGGATGGTCGGATTTGTCCATGTATTTGATACTTTCCCGGGTTGATTGCCATGGATTTGCGGGATATGGCATTA	CCTTTCTCTGTGCTGACTGCGGGGGGATGGGGATCTGGGTGGGGGTTCGCTACGATTCTCTGCTTGATGTGGAGACGGGCGGTTGAGATCGGAACTTGTTGGTGATAGATCTGCCTGTATGCTTCGTGTTGCATTGAATGGTGCTTAGATCTGTGGGATTGGTGATGGGATAGTCGGATTTGTCCATGTATTTGATACTTTCCCGGGTTGATTGCCATGGATTTGCGGGATATGGCATTA
CCTTTCTCTGTGCTGACTGCGGGGGGATGGGGATCTGGGTGGGGGTTCGCTACGATTCTCTGCTTGATGTGGAGACcGGGCGGTTGAGATCGGAACTTGTTGGTGATAGATCTGCCTGTATGCTTCGTGTTGCATTGAATGGTGCTTAGATCTGTGGGATTGGTGATGGGGTAGTCGGATTTGTCCATGTATTTGATACTTTCCCGGGTTGATTGCCATGGATTTGCGGGATATGGCATTA	11	33	Insertion	0.02	1	PFSVLTAGGWGSGWGFATILCLMWRPGG*	PFSVLTAGGWGSGWGFATILCLMWRRAVEIGTCW*	CCTTTCTCTGTGCTGACTGCGGGGGGATGGGGATCTGGGTGGGGGTTCGCTACGATTCTCTGCTTGATGTGGAGACCGGGCGGTTGAGATCGGAACTTGTTGGTGATAGATCTGCCTGTATGCTTCGTGTTGCATTGAATGGTGCTTAGATCTGTGGGATTGGTGATGGGGTAGTCGGATTTGTCCATGTATTTGATACTTTCCCGGGTTGATTGCCATGGATTTGCGGGATATGGCATTA	CCTTTCTCTGTGCTGACTGCGGGGGGATGGGGATCTGGGTGGGGGTTCGCTACGATTCTCTGCTTGATGTGGAGACGGGCGGTTGAGATCGGAACTTGTTGGTGATAGATCTGCCTGTATGCTTCGTGTTGCATTGAATGGTGCTTAGATCTGTGGGATTGGTGATGGGATAGTCGGATTTGTCCATGTATTTGATACTTTCCCGGGTTGATTGCCATGGATTTGCGGGATATGGCATTA
CCTTTCTCTGTGCTGACTGCGGGGGGATGGGGATCTGGGTGGGGGTTCGCTACGATTCTCTGCTTGATGTGGAGACcGGGCGGTTGAGATCGGAACTTGTTGGTGATAGATCTGCCTGTATGCTTCGTGTTGCGTTGAATGGTGCTTAGATCTGTGGGATTGGTGATGGGATAGTCGGATTTGTCCATGTATTTGATACTTTCCCGGGTTGATTGCCATGGATTTGCGGGATATGGCATTA	11	34	Insertion	0.02	1	PFSVLTAGGWGSGWGFATILCLMWRPGG*	PFSVLTAGGWGSGWGFATILCLMWRRAVEIGTCW*	CCTTTCTCTGTGCTGACTGCGGGGGGATGGGGATCTGGGTGGGGGTTCGCTACGATTCTCTGCTTGATGTGGAGACCGGGCGGTTGAGATCGGAACTTGTTGGTGATAGATCTGCCTGTATGCTTCGTGTTGCGTTGAATGGTGCTTAGATCTGTGGGATTGGTGATGGGATAGTCGGATTTGTCCATGTATTTGATACTTTCCCGGGTTGATTGCCATGGATTTGCGGGATATGGCATTA	CCTTTCTCTGTGCTGACTGCGGGGGGATGGGGATCTGGGTGGGGGTTCGCTACGATTCTCTGCTTGATGTGGAGACGGGCGGTTGAGATCGGAACTTGTTGGTGATAGATCTGCCTGTATGCTTCGTGTTGCATTGAATGGTGCTTAGATCTGTGGGATTGGTGATGGGATAGTCGGATTTGTCCATGTATTTGATACTTTCCCGGGTTGATTGCCATGGATTTGCGGGATATGGCATTA
CCTTTCTCTGTGCTGACTGCGGGGGGATGGGGATCTGGGTGGGGGTTCGCTACGATTCTCTGCTTGATGTGGAGACGGGCGGTTGAGATCGGAACTTGTTGGTGATAGATCTGCCTGTATGCTTCGTGTTACATTGAATGGTGCTTAGATCTGTGGGATTGGTGATGGGATAGTCGGATTTGTCCATGTATTTGATACTTTCCCGGGTTGATTGCCATGGATTTGCGGGATATGGCATTA	11	31	1 Base Change	0.02	0	PFSVLTAGGWGSGWGFATILCLMWRRAVEIGTCW*	PFSVLTAGGWGSGWGFATILCLMWRRAVEIGTCW*	CCTTTCTCTGTGCTGACTGCGGGGGGATGGGGATCTGGGTGGGGGTTCGCTACGATTCTCTGCTTGATGTGGAGACGGGCGGTTGAGATCGGAACTTGTTGGTGATAGATCTGCCTGTATGCTTCGTGTTACATTGAATGGTGCTTAGATCTGTGGGATTGGTGATGGGATAGTCGGATTTGTCCATGTATTTGATACTTTCCCGGGTTGATTGCCATGGATTTGCGGGATATGGCATTA	CCTTTCTCTGTGCTGACTGCGGGGGGATGGGGATCTGGGTGGGGGTTCGCTACGATTCTCTGCTTGATGTGGAGACGGGCGGTTGAGATCGGAACTTGTTGGTGATAGATCTGCCTGTATGCTTCGTGTTGCATTGAATGGTGCTTAGATCTGTGGGATTGGTGATGGGATAGTCGGATTTGTCCATGTATTTGATACTTTCCCGGGTTGATTGCCATGGATTTGCGGGATATGGCATTA
CCTTTCTCTGTGCTGACTGCGGGGGGATGGGGATCTGGGTGGGGGTTCGCTACGATTCTCTGCTTGATGTGGAGACGGGCGGTTGAGATCGGAACTTGTTGGTGATAGATCTGCCTGTATGCTTCGTGTTGCATTGAACGGTGCTTAGATCTGTGGGATTGGTGATGGGATAGTCGGATTTGTCCATGTATTTGATACTTTCCCGGGTTGATTGCCATGGATTTGCGGGATATGGCATTA	11	33	1 Base Change	0.02	0	PFSVLTAGGWGSGWGFATILCLMWRRAVEIGTCW*	PFSVLTAGGWGSGWGFATILCLMWRRAVEIGTCW*	CCTTTCTCTGTGCTGACTGCGGGGGGATGGGGATCTGGGTGGGGGTTCGCTACGATTCTCTGCTTGATGTGGAGACGGGCGGTTGAGATCGGAACTTGTTGGTGATAGATCTGCCTGTATGCTTCGTGTTGCATTGAACGGTGCTTAGATCTGTGGGATTGGTGATGGGATAGTCGGATTTGTCCATGTATTTGATACTTTCCCGGGTTGATTGCCATGGATTTGCGGGATATGGCATTA	CCTTTCTCTGTGCTGACTGCGGGGGGATGGGGATCTGGGTGGGGGTTCGCTACGATTCTCTGCTTGATGTGGAGACGGGCGGTTGAGATCGGAACTTGTTGGTGATAGATCTGCCTGTATGCTTCGTGTTGCATTGAATGGTGCTTAGATCTGTGGGATTGGTGATGGGATAGTCGGATTTGTCCATGTATTTGATACTTTCCCGGGTTGATTGCCATGGATTTGCGGGATATGGCATTA
CCTTTCTCTGTGCTGACTGCGGGGGGATGGGGATCTGGGTGGGGGTTCGCTACGATTCTCTGCTTGATGTGGAGACGGGCGGTTGAGATCGGAACTTGTTGGTGATAGATCTGCCTGTATGCTTCGTGTTGCATTGAATGGTGCTTAGATCTGTGGGATTGGTGATGGGATAGTCGGATTTGTCCATGTATTTGACACTTTCCCGGGTTGATTGCCATGGATTTGCGGGATATGGCATTA	11	34	1 Base Change	0.02	0	PFSVLTAGGWGSGWGFATILCLMWRRAVEIGTCW*	PFSVLTAGGWGSGWGFATILCLMWRRAVEIGTCW*	CCTTTCTCTGTGCTGACTGCGGGGGGATGGGGATCTGGGTGGGGGTTCGCTACGATTCTCTGCTTGATGTGGAGACGGGCGGTTGAGATCGGAACTTGTTGGTGATAGATCTGCCTGTATGCTTCGTGTTGCATTGAATGGTGCTTAGATCTGTGGGATTGGTGATGGGATAGTCGGATTTGTCCATGTATTTGACACTTTCCCGGGTTGATTGCCATGGATTTGCGGGATATGGCATTA	CCTTTCTCTGTGCTGACTGCGGGGGGATGGGGATCTGGGTGGGGGTTCGCTACGATTCTCTGCTTGATGTGGAGACGGGCGGTTGAGATCGGAACTTGTTGGTGATAGATCTGCCTGTATGCTTCGTGTTGCATTGAATGGTGCTTAGATCTGTGGGATTGGTGATGGGATAGTCGGATTTGTCCATGTATTTGATACTTTCCCGGGTTGATTGCCATGGATTTGCGGGATATGGCATTA
CCTTTCTCTGTGCTGACTGCGGGGGGATGGGGATCTGGGTGGGGGTTCGCTACGATTCTCTGCTTGATGTGGAGACGGGCGGTTGAGATCGGAACTTGTTGGTGATAGATCTGCCTGTGTGCTTCGTGTTGCATTGAATGGTGCTTAGATCTGTGGGATTGGTGATGGGATAGTCGGATTTGTCCATGTATTTGATACTTTCCCGGGTTGATTGCCATGGATTTGCGGGATATGGCATTA	11	32	1 Base Change	0.02	0	PFSVLTAGGWGSGWGFATILCLMWRRAVEIGTCW*	PFSVLTAGGWGSGWGFATILCLMWRRAVEIGTCW*	CCTTTCTCTGTGCTGACTGCGGGGGGATGGGGATCTGGGTGGGGGTTCGCTACGATTCTCTGCTTGATGTGGAGACGGGCGGTTGAGATCGGAACTTGTTGGTGATAGATCTGCCTGTGTGCTTCGTGTTGCATTGAATGGTGCTTAGATCTGTGGGATTGGTGATGGGATAGTCGGATTTGTCCATGTATTTGATACTTTCCCGGGTTGATTGCCATGGATTTGCGGGATATGGCATTA	CCTTTCTCTGTGCTGACTGCGGGGGGATGGGGATCTGGGTGGGGGTTCGCTACGATTCTCTGCTTGATGTGGAGACGGGCGGTTGAGATCGGAACTTGTTGGTGATAGATCTGCCTGTATGCTTCGTGTTGCATTGAATGGTGCTTAGATCTGTGGGATTGGTGATGGGATAGTCGGATTTGTCCATGTATTTGATACTTTCCCGGGTTGATTGCCATGGATTTGCGGGATATGGCATTA
CCTTTCTCTGTGCTGACTGCGGGGGGATGGGGATCTGGGTGGGGGTTCGCTACGATTCTCTGCTTGATGTGGAGACTgGGCGGTTGAGATCGGAACTTGTTGGTGATAGACCTGCCTGTATGCTTCGTGTTGCATTGAATGGTGCTTAGATCTGTGGGATTGGTGATGGGATAGTCGGATTTGTCCATGTATTTGATACTTTCCCGGGTTGATTGCCATGGATTTGCGGGATATGGCATTA	11	32	Insertion	0.02	1	PFSVLTAGGWGSGWGFATILCLMWRLGG*	PFSVLTAGGWGSGWGFATILCLMWRRAVEIGTCW*	CCTTTCTCTGTGCTGACTGCGGGGGGATGGGGATCTGGGTGGGGGTTCGCTACGATTCTCTGCTTGATGTGGAGACTGGGCGGTTGAGATCGGAACTTGTTGGTGATAGACCTGCCTGTATGCTTCGTGTTGCATTGAATGGTGCTTAGATCTGTGGGATTGGTGATGGGATAGTCGGATTTGTCCATGTATTTGATACTTTCCCGGGTTGATTGCCATGGATTTGCGGGATATGGCATTA	CCTTTCTCTGTGCTGACTGCGGGGGGATGGGGATCTGGGTGGGGGTTCGCTACGATTCTCTGCTTGATGTGGAGACGGGCGGTTGAGATCGGAACTTGTTGGTGATAGATCTGCCTGTATGCTTCGTGTTGCATTGAATGGTGCTTAGATCTGTGGGATTGGTGATGGGATAGTCGGATTTGTCCATGTATTTGATACTTTCCCGGGTTGATTGCCATGGATTTGCGGGATATGGCATTA
CCTTTCTCTGTGCTGACTGCGGGGGGATGGGGATCTGGGTGGGGGTTCGCTACGATTCTCTGCTTGATGTGGAGACTgGGCGGTTGAGATCGGAACTTGTTGGTGATAGATCTGCCTGTATGCTTCGCGTTGCATTGAATGGTGCTTAGATCTGTGGGATTGGTGATGGGATAGTCGGATTTGTCCATGTATTTGATACTTTCCCGGGTTGATTGCCATGGATTTGCGGGATATGGCATTA	11	33	Insertion	0.02	1	PFSVLTAGGWGSGWGFATILCLMWRLGG*	PFSVLTAGGWGSGWGFATILCLMWRRAVEIGTCW*	CCTTTCTCTGTGCTGACTGCGGGGGGATGGGGATCTGGGTGGGGGTTCGCTACGATTCTCTGCTTGATGTGGAGACTGGGCGGTTGAGATCGGAACTTGTTGGTGATAGATCTGCCTGTATGCTTCGCGTTGCATTGAATGGTGCTTAGATCTGTGGGATTGGTGATGGGATAGTCGGATTTGTCCATGTATTTGATACTTTCCCGGGTTGATTGCCATGGATTTGCGGGATATGGCATTA	CCTTTCTCTGTGCTGACTGCGGGGGGATGGGGATCTGGGTGGGGGTTCGCTACGATTCTCTGCTTGATGTGGAGACGGGCGGTTGAGATCGGAACTTGTTGGTGATAGATCTGCCTGTATGCTTCGTGTTGCATTGAATGGTGCTTAGATCTGTGGGATTGGTGATGGGATAGTCGGATTTGTCCATGTATTTGATACTTTCCCGGGTTGATTGCCATGGATTTGCGGGATATGGCATTA
CCTTTCTCTGTGCTGACTGCGGGGGGATGGGGATCTGGGTGGGGGTTCGCTACGATTCTCTGCTTGATGTGGAGACTgGGCGGTTGAGATCGGAACTTGTTGGTGATAGATCTGCCTGTATGCTTCGTGTCGCATTGAATGGTGCTTAGATCTGTGGGATTGGTGATGGGATAGTCGGATTTGTCCATGTATTTGATACTTTCCCGGGTTGATTGCCATGGATTTGCGGGATATGGCATTA	11	32	Insertion	0.02	1	PFSVLTAGGWGSGWGFATILCLMWRLGG*	PFSVLTAGGWGSGWGFATILCLMWRRAVEIGTCW*	CCTTTCTCTGTGCTGACTGCGGGGGGATGGGGATCTGGGTGGGGGTTCGCTACGATTCTCTGCTTGATGTGGAGACTGGGCGGTTGAGATCGGAACTTGTTGGTGATAGATCTGCCTGTATGCTTCGTGTCGCATTGAATGGTGCTTAGATCTGTGGGATTGGTGATGGGATAGTCGGATTTGTCCATGTATTTGATACTTTCCCGGGTTGATTGCCATGGATTTGCGGGATATGGCATTA	CCTTTCTCTGTGCTGACTGCGGGGGGATGGGGATCTGGGTGGGGGTTCGCTACGATTCTCTGCTTGATGTGGAGACGGGCGGTTGAGATCGGAACTTGTTGGTGATAGATCTGCCTGTATGCTTCGTGTTGCATTGAATGGTGCTTAGATCTGTGGGATTGGTGATGGGATAGTCGGATTTGTCCATGTATTTGATACTTTCCCGGGTTGATTGCCATGGATTTGCGGGATATGGCATTA
CCTTTCTCTGTGCTGACTGCGGGGGGATGGGGATCTGGGTGGGGGTTCGCTACGATTCTCTGCTTGATGTGGAGACTgGGCGGTTGAGATCGGAACTTGTTGGTGATAGATCTGCCTGTATGCTTCGTGTTGCATTGAATGGTGCCTAGATCTGTGGGATTGGTGATGGGATAGTCGGATTTGTCCATGTATTTGATACTTTCCCGGGTTGATTGCCATGGATTTGCGGGATATGGCATTA	11	33	Insertion	0.02	1	PFSVLTAGGWGSGWGFATILCLMWRLGG*	PFSVLTAGGWGSGWGFATILCLMWRRAVEIGTCW*	CCTTTCTCTGTGCTGACTGCGGGGGGATGGGGATCTGGGTGGGGGTTCGCTACGATTCTCTGCTTGATGTGGAGACTGGGCGGTTGAGATCGGAACTTGTTGGTGATAGATCTGCCTGTATGCTTCGTGTTGCATTGAATGGTGCCTAGATCTGTGGGATTGGTGATGGGATAGTCGGATTTGTCCATGTATTTGATACTTTCCCGGGTTGATTGCCATGGATTTGCGGGATATGGCATTA	CCTTTCTCTGTGCTGACTGCGGGGGGATGGGGATCTGGGTGGGGGTTCGCTACGATTCTCTGCTTGATGTGGAGACGGGCGGTTGAGATCGGAACTTGTTGGTGATAGATCTGCCTGTATGCTTCGTGTTGCATTGAATGGTGCTTAGATCTGTGGGATTGGTGATGGGATAGTCGGATTTGTCCATGTATTTGATACTTTCCCGGGTTGATTGCCATGGATTTGCGGGATATGGCATTA
CCTTTCTCTGTGCTGACTGCGGGGGGATGGGGATCTGGGTGGGGGTTCGCTACGATTCTCTGCTTGATGTGGAGACTgGGCGGTTGAGATCGGAACTTGTTGGTGATAGATCTGCCTGTATGCTTCGTGTTGCATTGAATGGTGCTTAGATCTGTGGGATTGGTGATGGGATAGTCGGATTTGTCCACGTATTTGATACTTTCCCGGGTTGATTGCCATGGATTTGCGGGATATGGCATTA	11	33	Insertion	0.02	1	PFSVLTAGGWGSGWGFATILCLMWRLGG*	PFSVLTAGGWGSGWGFATILCLMWRRAVEIGTCW*	CCTTTCTCTGTGCTGACTGCGGGGGGATGGGGATCTGGGTGGGGGTTCGCTACGATTCTCTGCTTGATGTGGAGACTGGGCGGTTGAGATCGGAACTTGTTGGTGATAGATCTGCCTGTATGCTTCGTGTTGCATTGAATGGTGCTTAGATCTGTGGGATTGGTGATGGGATAGTCGGATTTGTCCACGTATTTGATACTTTCCCGGGTTGATTGCCATGGATTTGCGGGATATGGCATTA	CCTTTCTCTGTGCTGACTGCGGGGGGATGGGGATCTGGGTGGGGGTTCGCTACGATTCTCTGCTTGATGTGGAGACGGGCGGTTGAGATCGGAACTTGTTGGTGATAGATCTGCCTGTATGCTTCGTGTTGCATTGAATGGTGCTTAGATCTGTGGGATTGGTGATGGGATAGTCGGATTTGTCCATGTATTTGATACTTTCCCGGGTTGATTGCCATGGATTTGCGGGATATGGCATTA
CCTTTCTCTGTGCTGACTGCGGGGGGATGGGGATCTGGGTGGGGGTTCGCTACGATTCTCTGCTTGATGTGGGGACcGGGCGGTTGAGATCGGAACTTGTTGGTGATAGATCTGCCTGTATGCTTCGTGTTGCATTGAATGGTGCTTAGATCTGTGGGATTGGTGATGGGATAGTCGGATTTGTCCATGTATTTGATACTTTCCCGGGTTGATTGCCATGGATTTGCGGGATATGGCATTA	11	34	Insertion	0.02	1	PFSVLTAGGWGSGWGFATILCLMWGPGG*	PFSVLTAGGWGSGWGFATILCLMWRRAVEIGTCW*	CCTTTCTCTGTGCTGACTGCGGGGGGATGGGGATCTGGGTGGGGGTTCGCTACGATTCTCTGCTTGATGTGGGGACCGGGCGGTTGAGATCGGAACTTGTTGGTGATAGATCTGCCTGTATGCTTCGTGTTGCATTGAATGGTGCTTAGATCTGTGGGATTGGTGATGGGATAGTCGGATTTGTCCATGTATTTGATACTTTCCCGGGTTGATTGCCATGGATTTGCGGGATATGGCATTA	CCTTTCTCTGTGCTGACTGCGGGGGGATGGGGATCTGGGTGGGGGTTCGCTACGATTCTCTGCTTGATGTGGAGACGGGCGGTTGAGATCGGAACTTGTTGGTGATAGATCTGCCTGTATGCTTCGTGTTGCATTGAATGGTGCTTAGATCTGTGGGATTGGTGATGGGATAGTCGGATTTGTCCATGTATTTGATACTTTCCCGGGTTGATTGCCATGGATTTGCGGGATATGGCATTA
CCTTTCTCTGTGCTGACTGCGGGGGGATGGGGATCTGGGTGGGGGTTCGCTACGATTCTCTGCTTGGTGTGGAGACGGGCGGTTGAGATCGGAACTTGTTGGTGATAGATCTGCCTGTATGCTTCGTGTTGCATTGAATGGTGCTTAGATCTGTGGGATTGGTGATGGGATAGTCGGATTTGTCCATGTATTTGATACTTTCCCGGGTTGATTGCCATGGATTTGCGGGATATGGCATTA	11	34	1 Base Change	0.02	0	PFSVLTAGGWGSGWGFATILCLVWRRAVEIGTCW*	PFSVLTAGGWGSGWGFATILCLMWRRAVEIGTCW*	CCTTTCTCTGTGCTGACTGCGGGGGGATGGGGATCTGGGTGGGGGTTCGCTACGATTCTCTGCTTGGTGTGGAGACGGGCGGTTGAGATCGGAACTTGTTGGTGATAGATCTGCCTGTATGCTTCGTGTTGCATTGAATGGTGCTTAGATCTGTGGGATTGGTGATGGGATAGTCGGATTTGTCCATGTATTTGATACTTTCCCGGGTTGATTGCCATGGATTTGCGGGATATGGCATTA	CCTTTCTCTGTGCTGACTGCGGGGGGATGGGGATCTGGGTGGGGGTTCGCTACGATTCTCTGCTTGATGTGGAGACGGGCGGTTGAGATCGGAACTTGTTGGTGATAGATCTGCCTGTATGCTTCGTGTTGCATTGAATGGTGCTTAGATCTGTGGGATTGGTGATGGGATAGTCGGATTTGTCCATGTATTTGATACTTTCCCGGGTTGATTGCCATGGATTTGCGGGATATGGCATTA
CCTTTC-CTGTGCTGACTGCGGGGGGATGGGGATCTGGGTGGGGGTTCGCTACGATTCTCTGCTTGATGTGGAGACTgGGCGGTTGAGATCGGAACTTGTTGGTGATAGATCTGCCTGTATGCTTCGTGTTGCATTGAATGGTGCTTAGATCTGTGGGATTGGTGATGGGATAGTCGGATTTGTCCATGTATTTGATACTTTCCCGGGTTGATTGCCATGGATTTGCGGGATATGGCATTA	10	34	Insertion and Deletion	0.02	0	PFLC*	PFSVLTAGGWGSGWGFATILCLMWRRAVEIGTCW*	CCTTTC-CTGTGCTGACTGCGGGGGGATGGGGATCTGGGTGGGGGTTCGCTACGATTCTCTGCTTGATGTGGAGACTGGGCGGTTGAGATCGGAACTTGTTGGTGATAGATCTGCCTGTATGCTTCGTGTTGCATTGAATGGTGCTTAGATCTGTGGGATTGGTGATGGGATAGTCGGATTTGTCCATGTATTTGATACTTTCCCGGGTTGATTGCCATGGATTTGCGGGATATGGCATTA	CCTTTCTCTGTGCTGACTGCGGGGGGATGGGGATCTGGGTGGGGGTTCGCTACGATTCTCTGCTTGATGTGGAGACGGGCGGTTGAGATCGGAACTTGTTGGTGATAGATCTGCCTGTATGCTTCGTGTTGCATTGAATGGTGCTTAGATCTGTGGGATTGGTGATGGGATAGTCGGATTTGTCCATGTATTTGATACTTTCCCGGGTTGATTGCCATGGATTTGCGGGATATGGCATTA
CCTTTCT-TGTGCTGACTGCGGGGGGATGGGGATCTGGGTGGGGGTTCGCTACGATTCTCTGCTTGATGTGG----GGGCGGTTGAGATCGGAACTTGTTGGTGATAGATCTGCCTGTATGCTTCGTGTTGCATTGAATGGTGCTTAGATCTGTGGGATTGGTGATGGGATAGTCGGATTTGTCCATGTATTTGATACTTTCCCGGGTTGATTGCCATGGATTTGCGGGATATGGCATTA	10	32	Deletion	0.02	-5	PFLC*	PFSVLTAGGWGSGWGFATILCLMWRRAVEIGTCW*	CCTTTCT-TGTGCTGACTGCGGGGGGATGGGGATCTGGGTGGGGGTTCGCTACGATTCTCTGCTTGATGTGG----GGGCGGTTGAGATCGGAACTTGTTGGTGATAGATCTGCCTGTATGCTTCGTGTTGCATTGAATGGTGCTTAGATCTGTGGGATTGGTGATGGGATAGTCGGATTTGTCCATGTATTTGATACTTTCCCGGGTTGATTGCCATGGATTTGCGGGATATGGCATTA	CCTTTCTCTGTGCTGACTGCGGGGGGATGGGGATCTGGGTGGGGGTTCGCTACGATTCTCTGCTTGATGTGGAGACGGGCGGTTGAGATCGGAACTTGTTGGTGATAGATCTGCCTGTATGCTTCGTGTTGCATTGAATGGTGCTTAGATCTGTGGGATTGGTGATGGGATAGTCGGATTTGTCCATGTATTTGATACTTTCCCGGGTTGATTGCCATGGATTTGCGGGATATGGCATTA
CCTTTCTCTGTACTGACTGCGGGGGGATGGGGATCTGGGTGGGGGTTCGCTACGATTCTCTGCTTGATGTGGAGACGGGCGGTTGAGATCGGAACTTGTTGGTGATAGATCTGCCTGTATGCTTCGTGTTGCATTGAATGGTGCTTAGATCTGTGGGATTGGTGATGGGATAGTCGGATTTGTCCATGTATTTGATACTTTCCCGGGTTGATTGCCATGGATTTGCGGGATATGGCATTA	10	33	1 Base Change	0.02	0	PFSVLTAGGWGSGWGFATILCLMWRRAVEIGTCW*	PFSVLTAGGWGSGWGFATILCLMWRRAVEIGTCW*	CCTTTCTCTGTACTGACTGCGGGGGGATGGGGATCTGGGTGGGGGTTCGCTACGATTCTCTGCTTGATGTGGAGACGGGCGGTTGAGATCGGAACTTGTTGGTGATAGATCTGCCTGTATGCTTCGTGTTGCATTGAATGGTGCTTAGATCTGTGGGATTGGTGATGGGATAGTCGGATTTGTCCATGTATTTGATACTTTCCCGGGTTGATTGCCATGGATTTGCGGGATATGGCATTA	CCTTTCTCTGTGCTGACTGCGGGGGGATGGGGATCTGGGTGGGGGTTCGCTACGATTCTCTGCTTGATGTGGAGACGGGCGGTTGAGATCGGAACTTGTTGGTGATAGATCTGCCTGTATGCTTCGTGTTGCATTGAATGGTGCTTAGATCTGTGGGATTGGTGATGGGATAGTCGGATTTGTCCATGTATTTGATACTTTCCCGGGTTGATTGCCATGGATTTGCGGGATATGGCATTA
CCTTTCTCTGTGCTGACTGCAGGGGGATGGGGATCTGGGTGGGGGTTCGCTACGATTCTCTGCTTGATGTGGAGACGGGCGGTTGAGATCGGAACTTGTTGGTGATAGATCTGCCTGTATGCTTCGTGTTGCATTGAATGGTGCTTAGATCTGTGGGATTGGTGATGGGATAGTCGGATTTGTCCATGTATTTGATACTTTCCCGGGTTGATTGCCATGGATTTGCGGGATATGGCATTA	10	34	1 Base Change	0.02	0	PFSVLTAGGWGSGWGFATILCLMWRRAVEIGTCW*	PFSVLTAGGWGSGWGFATILCLMWRRAVEIGTCW*	CCTTTCTCTGTGCTGACTGCAGGGGGATGGGGATCTGGGTGGGGGTTCGCTACGATTCTCTGCTTGATGTGGAGACGGGCGGTTGAGATCGGAACTTGTTGGTGATAGATCTGCCTGTATGCTTCGTGTTGCATTGAATGGTGCTTAGATCTGTGGGATTGGTGATGGGATAGTCGGATTTGTCCATGTATTTGATACTTTCCCGGGTTGATTGCCATGGATTTGCGGGATATGGCATTA	CCTTTCTCTGTGCTGACTGCGGGGGGATGGGGATCTGGGTGGGGGTTCGCTACGATTCTCTGCTTGATGTGGAGACGGGCGGTTGAGATCGGAACTTGTTGGTGATAGATCTGCCTGTATGCTTCGTGTTGCATTGAATGGTGCTTAGATCTGTGGGATTGGTGATGGGATAGTCGGATTTGTCCATGTATTTGATACTTTCCCGGGTTGATTGCCATGGATTTGCGGGATATGGCATTA
CCTTTCTCTGTGCTGACTGCGGGGGGATGGGGATCTGGGGGGGGGTTCGCTACGATTCTCTGCTTGATGTGGAGACcGGGCGGTTGAGATCGGAACTTGTTGGTGATAGATCTGCCTGTATGCTTCGTGTTGCATTGAATGGTGCTTAGATCTGTGGGATTGGTGATGGGATAGTCGGATTTGTCCATGTATTTGATACTTTCCCGGGTTGATTGCCATGGATTTGCGGGATATGGCATTA	10	26	Insertion	0.02	1	PFSVLTAGGWGSGGGFATILCLMWRPGG*	PFSVLTAGGWGSGWGFATILCLMWRRAVEIGTCW*	CCTTTCTCTGTGCTGACTGCGGGGGGATGGGGATCTGGGGGGGGGTTCGCTACGATTCTCTGCTTGATGTGGAGACCGGGCGGTTGAGATCGGAACTTGTTGGTGATAGATCTGCCTGTATGCTTCGTGTTGCATTGAATGGTGCTTAGATCTGTGGGATTGGTGATGGGATAGTCGGATTTGTCCATGTATTTGATACTTTCCCGGGTTGATTGCCATGGATTTGCGGGATATGGCATTA	CCTTTCTCTGTGCTGACTGCGGGGGGATGGGGATCTGGGTGGGGGTTCGCTACGATTCTCTGCTTGATGTGGAGACGGGCGGTTGAGATCGGAACTTGTTGGTGATAGATCTGCCTGTATGCTTCGTGTTGCATTGAATGGTGCTTAGATCTGTGGGATTGGTGATGGGATAGTCGGATTTGTCCATGTATTTGATACTTTCCCGGGTTGATTGCCATGGATTTGCGGGATATGGCATTA
CCTTTCTCTGTGCTGACTGCGGGGGGATGGGGATCTGGGGGGGGGTTCGCTACGATTCTCTGCTTGATGTGGAGACGGGCGGTTGAGATCGGAACTTGTTGGTGATAGATCTGCCTGTATGCTTCGTGTTGCATTGAATGGTGCTTAGATCTGTGGGATTGGTGATGGGATAGTCGGATTTGTCCATGTATTTGATACTTTCCCGGGTTGATTGCCATGGATTTGCGGGATATGGCATTA	10	27	1 Base Change	0.02	0	PFSVLTAGGWGSGGGFATILCLMWRRAVEIGTCW*	PFSVLTAGGWGSGWGFATILCLMWRRAVEIGTCW*	CCTTTCTCTGTGCTGACTGCGGGGGGATGGGGATCTGGGGGGGGGTTCGCTACGATTCTCTGCTTGATGTGGAGACGGGCGGTTGAGATCGGAACTTGTTGGTGATAGATCTGCCTGTATGCTTCGTGTTGCATTGAATGGTGCTTAGATCTGTGGGATTGGTGATGGGATAGTCGGATTTGTCCATGTATTTGATACTTTCCCGGGTTGATTGCCATGGATTTGCGGGATATGGCATTA	CCTTTCTCTGTGCTGACTGCGGGGGGATGGGGATCTGGGTGGGGGTTCGCTACGATTCTCTGCTTGATGTGGAGACGGGCGGTTGAGATCGGAACTTGTTGGTGATAGATCTGCCTGTATGCTTCGTGTTGCATTGAATGGTGCTTAGATCTGTGGGATTGGTGATGGGATAGTCGGATTTGTCCATGTATTTGATACTTTCCCGGGTTGATTGCCATGGATTTGCGGGATATGGCATTA
CCTTTCTCTGTGCTGACTGCGGGGGGATGGGGATCTGGGTGGGGGTCCGCTACGATTCTCTGCTTGATGTGGAGACcGGGCGGTTGAGATCGGAACTTGTTGGTGATAGATCTGCCTGTATGCTTCGTGTTGCATTGAATGGTGCTTAGATCTGTGGGATTGGTGATGGGATAGTCGGATTTGTCCATGTATTTGATACTTTCCCGGGTTGATTGCCATGGATTTGCGGGATATGGCATTA	10	32	Insertion	0.02	1	PFSVLTAGGWGSGWGSATILCLMWRPGG*	PFSVLTAGGWGSGWGFATILCLMWRRAVEIGTCW*	CCTTTCTCTGTGCTGACTGCGGGGGGATGGGGATCTGGGTGGGGGTCCGCTACGATTCTCTGCTTGATGTGGAGACCGGGCGGTTGAGATCGGAACTTGTTGGTGATAGATCTGCCTGTATGCTTCGTGTTGCATTGAATGGTGCTTAGATCTGTGGGATTGGTGATGGGATAGTCGGATTTGTCCATGTATTTGATACTTTCCCGGGTTGATTGCCATGGATTTGCGGGATATGGCATTA	CCTTTCTCTGTGCTGACTGCGGGGGGATGGGGATCTGGGTGGGGGTTCGCTACGATTCTCTGCTTGATGTGGAGACGGGCGGTTGAGATCGGAACTTGTTGGTGATAGATCTGCCTGTATGCTTCGTGTTGCATTGAATGGTGCTTAGATCTGTGGGATTGGTGATGGGATAGTCGGATTTGTCCATGTATTTGATACTTTCCCGGGTTGATTGCCATGGATTTGCGGGATATGGCATTA
CCTTTCTCTGTGCTGACTGCGGGGGGATGGGGATCTGGGTGGGGGTTCGCTACGATTCTC--------------------------GCTCGGAACTTGTTGGTGATAGATCTGCCTGTATGCTTCGTGTTGCATTGAATGGTGCTTAGATCTGTGGGATTGGTGATGGGATAGTCGGATTTGTCCATGTATTTGATACTTTCCCGGGTTGATTGCCATGGATTTGCGGGATATGGCATTA	10	33	Deletion	0.02	-26	PFSVLTAGGWGSGWGFATILARNLLVIDLPVCFVLH*	PFSVLTAGGWGSGWGFATILCLMWRRAVEIGTCW*	CCTTTCTCTGTGCTGACTGCGGGGGGATGGGGATCTGGGTGGGGGTTCGCTACGATTCTC--------------------------GCTCGGAACTTGTTGGTGATAGATCTGCCTGTATGCTTCGTGTTGCATTGAATGGTGCTTAGATCTGTGGGATTGGTGATGGGATAGTCGGATTTGTCCATGTATTTGATACTTTCCCGGGTTGATTGCCATGGATTTGCGGGATATGGCATTA	CCTTTCTCTGTGCTGACTGCGGGGGGATGGGGATCTGGGTGGGGGTTCGCTACGATTCTCTGCTTGATGTGGAGACGGGCGGTTGAGATCGGAACTTGTTGGTGATAGATCTGCCTGTATGCTTCGTGTTGCATTGAATGGTGCTTAGATCTGTGGGATTGGTGATGGGATAGTCGGATTTGTCCATGTATTTGATACTTTCCCGGGTTGATTGCCATGGATTTGCGGGATATGGCATTA
CCTTTCTCTGTGCTGACTGCGGGGGGATGGGGATCTGGGTGGGGGTTCGCTACGATTCTCCGCTTGATGTGG---CGGGCGGTTGAGATCGGAACTTGTTGGTGATAGATCTGCCTGTATGCTTCGTGTTGCATTGAATGGTGCTTAGATCTGTGGGATTGGTGATGGGATAGTCGGATTTGTCCATGTATTTGATACTTTCCCGGGTTGATTGCCATGGATTTGCGGGATATGGCATTA	10	28	Deletion	0.02	-3	PFSVLTAGGWGSGWGFATILRLMWRAVEIGTCW*	PFSVLTAGGWGSGWGFATILCLMWRRAVEIGTCW*	CCTTTCTCTGTGCTGACTGCGGGGGGATGGGGATCTGGGTGGGGGTTCGCTACGATTCTCCGCTTGATGTGG---CGGGCGGTTGAGATCGGAACTTGTTGGTGATAGATCTGCCTGTATGCTTCGTGTTGCATTGAATGGTGCTTAGATCTGTGGGATTGGTGATGGGATAGTCGGATTTGTCCATGTATTTGATACTTTCCCGGGTTGATTGCCATGGATTTGCGGGATATGGCATTA	CCTTTCTCTGTGCTGACTGCGGGGGGATGGGGATCTGGGTGGGGGTTCGCTACGATTCTCTGCTTGATGTGGAGACGGGCGGTTGAGATCGGAACTTGTTGGTGATAGATCTGCCTGTATGCTTCGTGTTGCATTGAATGGTGCTTAGATCTGTGGGATTGGTGATGGGATAGTCGGATTTGTCCATGTATTTGATACTTTCCCGGGTTGATTGCCATGGATTTGCGGGATATGGCATTA
CCTTTCTCTGTGCTGACTGCGGGGGGATGGGGATCTGGGTGGGGGTTCGCTACGATTCTCTGCCTGATGTGGAGACcGGGCGGTTGAGATCGGAACTTGTTGGTGATAGATCTGCCTGTATGCTTCGTGTTGCATTGAATGGTGCTTAGATCTGTGGGATTGGTGATGGGATAGTCGGATTTGTCCATGTATTTGATACTTTCCCGGGTTGATTGCCATGGATTTGCGGGATATGGCATTA	10	34	Insertion	0.02	1	PFSVLTAGGWGSGWGFATILCLMWRPGG*	PFSVLTAGGWGSGWGFATILCLMWRRAVEIGTCW*	CCTTTCTCTGTGCTGACTGCGGGGGGATGGGGATCTGGGTGGGGGTTCGCTACGATTCTCTGCCTGATGTGGAGACCGGGCGGTTGAGATCGGAACTTGTTGGTGATAGATCTGCCTGTATGCTTCGTGTTGCATTGAATGGTGCTTAGATCTGTGGGATTGGTGATGGGATAGTCGGATTTGTCCATGTATTTGATACTTTCCCGGGTTGATTGCCATGGATTTGCGGGATATGGCATTA	CCTTTCTCTGTGCTGACTGCGGGGGGATGGGGATCTGGGTGGGGGTTCGCTACGATTCTCTGCTTGATGTGGAGACGGGCGGTTGAGATCGGAACTTGTTGGTGATAGATCTGCCTGTATGCTTCGTGTTGCATTGAATGGTGCTTAGATCTGTGGGATTGGTGATGGGATAGTCGGATTTGTCCATGTATTTGATACTTTCCCGGGTTGATTGCCATGGATTTGCGGGATATGGCATTA
CCTTTCTCTGTGCTGACTGCGGGGGGATGGGGATCTGGGTGGGGGTTCGCTACGATTCTCTGCTCGATGTGG---CGGGCGGTTGAGATCGGAACTTGTTGGTGATAGATCTGCCTGTATGCTTCGTGTTGCATTGAATGGTGCTTAGATCTGTGGGATTGGTGATGGGATAGTCGGATTTGTCCATGTATTTGATACTTTCCCGGGTTGATTGCCATGGATTTGCGGGATATGGCATTA	10	30	Deletion	0.02	-3	PFSVLTAGGWGSGWGFATILCSMWRAVEIGTCW*	PFSVLTAGGWGSGWGFATILCLMWRRAVEIGTCW*	CCTTTCTCTGTGCTGACTGCGGGGGGATGGGGATCTGGGTGGGGGTTCGCTACGATTCTCTGCTCGATGTGG---CGGGCGGTTGAGATCGGAACTTGTTGGTGATAGATCTGCCTGTATGCTTCGTGTTGCATTGAATGGTGCTTAGATCTGTGGGATTGGTGATGGGATAGTCGGATTTGTCCATGTATTTGATACTTTCCCGGGTTGATTGCCATGGATTTGCGGGATATGGCATTA	CCTTTCTCTGTGCTGACTGCGGGGGGATGGGGATCTGGGTGGGGGTTCGCTACGATTCTCTGCTTGATGTGGAGACGGGCGGTTGAGATCGGAACTTGTTGGTGATAGATCTGCCTGTATGCTTCGTGTTGCATTGAATGGTGCTTAGATCTGTGGGATTGGTGATGGGATAGTCGGATTTGTCCATGTATTTGATACTTTCCCGGGTTGATTGCCATGGATTTGCGGGATATGGCATTA
CCTTTCTCTGTGCTGACTGCGGGGGGATGGGGATCTGGGTGGGGGTTCGCTACGATTCTCTGCTTGATGT---GACGGGCGGTTGAGATCGGAACTTGTTGGTGATAGATCTGCCTGTATGCTTCGTGTTGCATTGAATGGTGCTTAGATCTGTGGGATTGGTGATGGGATAGTCGGATTTGTCCATGTATTTGATACTTTCCCGGGTTGATTGCCATGGATTTGCGGGATATGGCATTA	10	33	Deletion	0.02	-3	PFSVLTAGGWGSGWGFATILCLM*	PFSVLTAGGWGSGWGFATILCLMWRRAVEIGTCW*	CCTTTCTCTGTGCTGACTGCGGGGGGATGGGGATCTGGGTGGGGGTTCGCTACGATTCTCTGCTTGATGT---GACGGGCGGTTGAGATCGGAACTTGTTGGTGATAGATCTGCCTGTATGCTTCGTGTTGCATTGAATGGTGCTTAGATCTGTGGGATTGGTGATGGGATAGTCGGATTTGTCCATGTATTTGATACTTTCCCGGGTTGATTGCCATGGATTTGCGGGATATGGCATTA	CCTTTCTCTGTGCTGACTGCGGGGGGATGGGGATCTGGGTGGGGGTTCGCTACGATTCTCTGCTTGATGTGGAGACGGGCGGTTGAGATCGGAACTTGTTGGTGATAGATCTGCCTGTATGCTTCGTGTTGCATTGAATGGTGCTTAGATCTGTGGGATTGGTGATGGGATAGTCGGATTTGTCCATGTATTTGATACTTTCCCGGGTTGATTGCCATGGATTTGCGGGATATGGCATTA
CCTTTCTCTGTGCTGACTGCGGGGGGATGGGGATCTGGGTGGGGGTTCGCTACGATTCTCTGCTTGATGTGG----GGGCGGTTGAGATCGGAACTTGTTGGTGATAGATCTGCCTGTATGCTTCGTGTTGCATTGAATGGTGCTTAGATCTGTGGGATTGGTGATGGGATAGTCGGATTTGTCCATGTATTTGATACTTTCCCGGGTTGATTGCCATGGATTTGCGGGATA-GGCATTA	10	32	Deletion	0.02	-5	PFSVLTAGGWGSGWGFATILCLMWGRLRSELVGDRSACMLRVALNGA*	PFSVLTAGGWGSGWGFATILCLMWRRAVEIGTCW*	CCTTTCTCTGTGCTGACTGCGGGGGGATGGGGATCTGGGTGGGGGTTCGCTACGATTCTCTGCTTGATGTGG----GGGCGGTTGAGATCGGAACTTGTTGGTGATAGATCTGCCTGTATGCTTCGTGTTGCATTGAATGGTGCTTAGATCTGTGGGATTGGTGATGGGATAGTCGGATTTGTCCATGTATTTGATACTTTCCCGGGTTGATTGCCATGGATTTGCGGGATA-GGCATTA	CCTTTCTCTGTGCTGACTGCGGGGGGATGGGGATCTGGGTGGGGGTTCGCTACGATTCTCTGCTTGATGTGGAGACGGGCGGTTGAGATCGGAACTTGTTGGTGATAGATCTGCCTGTATGCTTCGTGTTGCATTGAATGGTGCTTAGATCTGTGGGATTGGTGATGGGATAGTCGGATTTGTCCATGTATTTGATACTTTCCCGGGTTGATTGCCATGGATTTGCGGGATATGGCATTA
CCTTTCTCTGTGCTGACTGCGGGGGGATGGGGATCTGGGTGGGGGTTCGCTACGATTCTCTGCTTGATGTGG----GGGCGGTTGAGATCGGAACTTGTTGGTGATAGATCTGCCTGTATGCTTCGTGTTGCATTGAATGGTGCTTAGATCTGTGGGGTTGGTGATGGGATAGTCGGATTTGTCCATGTATTTGATACTTTCCCGGGTTGATTGCCATGGATTTGCGGGATATGGCATTA	10	33	Deletion	0.02	-4	PFSVLTAGGWGSGWGFATILCLMWGRLRSELVGDRSACMLRVALNGA*	PFSVLTAGGWGSGWGFATILCLMWRRAVEIGTCW*	CCTTTCTCTGTGCTGACTGCGGGGGGATGGGGATCTGGGTGGGGGTTCGCTACGATTCTCTGCTTGATGTGG----GGGCGGTTGAGATCGGAACTTGTTGGTGATAGATCTGCCTGTATGCTTCGTGTTGCATTGAATGGTGCTTAGATCTGTGGGGTTGGTGATGGGATAGTCGGATTTGTCCATGTATTTGATACTTTCCCGGGTTGATTGCCATGGATTTGCGGGATATGGCATTA	CCTTTCTCTGTGCTGACTGCGGGGGGATGGGGATCTGGGTGGGGGTTCGCTACGATTCTCTGCTTGATGTGGAGACGGGCGGTTGAGATCGGAACTTGTTGGTGATAGATCTGCCTGTATGCTTCGTGTTGCATTGAATGGTGCTTAGATCTGTGGGATTGGTGATGGGATAGTCGGATTTGTCCATGTATTTGATACTTTCCCGGGTTGATTGCCATGGATTTGCGGGATATGGCATTA
CCTTTCTCTGTGCTGACTGCGGGGGGATGGGGATCTGGGTGGGGGTTCGCTACGATTCTCTGCTTGATGTGG---CGGGCGGTTGAGATCGGAACTTGTTGGTGATAGATCTGCCTGTATGCTTCGTGTTGCATTGAATGGTGCTTAGATCTGTGGGATTGGTGATGGGATAGTCGGATTTGTCCATGTATTTGATACTTTCCCGGGTTGATTGCCATGGATTTGCGGGAT-TGGCATTA	10	29	Deletion	0.02	-4	PFSVLTAGGWGSGWGFATILCLMWRAVEIGTCW*	PFSVLTAGGWGSGWGFATILCLMWRRAVEIGTCW*	CCTTTCTCTGTGCTGACTGCGGGGGGATGGGGATCTGGGTGGGGGTTCGCTACGATTCTCTGCTTGATGTGG---CGGGCGGTTGAGATCGGAACTTGTTGGTGATAGATCTGCCTGTATGCTTCGTGTTGCATTGAATGGTGCTTAGATCTGTGGGATTGGTGATGGGATAGTCGGATTTGTCCATGTATTTGATACTTTCCCGGGTTGATTGCCATGGATTTGCGGGAT-TGGCATTA	CCTTTCTCTGTGCTGACTGCGGGGGGATGGGGATCTGGGTGGGGGTTCGCTACGATTCTCTGCTTGATGTGGAGACGGGCGGTTGAGATCGGAACTTGTTGGTGATAGATCTGCCTGTATGCTTCGTGTTGCATTGAATGGTGCTTAGATCTGTGGGATTGGTGATGGGATAGTCGGATTTGTCCATGTATTTGATACTTTCCCGGGTTGATTGCCATGGATTTGCGGGATATGGCATTA
CCTTTCTCTGTGCTGACTGCGGGGGGATGGGGATCTGGGTGGGGGTTCGCTACGATTCTCTGCTTGATGTGG---CGGGCGGTTGAGATCGGAACTTGTTGGTGATAGATCTGCCTGTATGCTTCGTGTTGCATTGAATGGTGCTTAGATCTGTGGGATTGGTGATGGGATAGTCGGATTTGTCCATGTATTTGGTACTTTCCCGGGTTGATTGCCATGGATTTGCGGGATATGGCATTA	10	29	Deletion	0.02	-3	PFSVLTAGGWGSGWGFATILCLMWRAVEIGTCW*	PFSVLTAGGWGSGWGFATILCLMWRRAVEIGTCW*	CCTTTCTCTGTGCTGACTGCGGGGGGATGGGGATCTGGGTGGGGGTTCGCTACGATTCTCTGCTTGATGTGG---CGGGCGGTTGAGATCGGAACTTGTTGGTGATAGATCTGCCTGTATGCTTCGTGTTGCATTGAATGGTGCTTAGATCTGTGGGATTGGTGATGGGATAGTCGGATTTGTCCATGTATTTGGTACTTTCCCGGGTTGATTGCCATGGATTTGCGGGATATGGCATTA	CCTTTCTCTGTGCTGACTGCGGGGGGATGGGGATCTGGGTGGGGGTTCGCTACGATTCTCTGCTTGATGTGGAGACGGGCGGTTGAGATCGGAACTTGTTGGTGATAGATCTGCCTGTATGCTTCGTGTTGCATTGAATGGTGCTTAGATCTGTGGGATTGGTGATGGGATAGTCGGATTTGTCCATGTATTTGATACTTTCCCGGGTTGATTGCCATGGATTTGCGGGATATGGCATTA
CCTTTCTCTGTGCTGACTGCGGGGGGATGGGGATCTGGGTGGGGGTTCGCTACGATTCTCTGCTTGATGTGGAGACcGGGCGGCTGAGATCGGAACTTGTTGGTGATAGATCTGCCTGTATGCTTCGTGTTGCATTGAATGGTGCTTAGATCTGTGGGATTGGTGATGGGATAGTCGGATTTGTCCATGTATTTGATACTTTCCCGGGTTGATTGCCATGGATTTGCGGGATATGGCATTA	10	33	Insertion	0.02	1	PFSVLTAGGWGSGWGFATILCLMWRPGG*	PFSVLTAGGWGSGWGFATILCLMWRRAVEIGTCW*	CCTTTCTCTGTGCTGACTGCGGGGGGATGGGGATCTGGGTGGGGGTTCGCTACGATTCTCTGCTTGATGTGGAGACCGGGCGGCTGAGATCGGAACTTGTTGGTGATAGATCTGCCTGTATGCTTCGTGTTGCATTGAATGGTGCTTAGATCTGTGGGATTGGTGATGGGATAGTCGGATTTGTCCATGTATTTGATACTTTCCCGGGTTGATTGCCATGGATTTGCGGGATATGGCATTA	CCTTTCTCTGTGCTGACTGCGGGGGGATGGGGATCTGGGTGGGGGTTCGCTACGATTCTCTGCTTGATGTGGAGACGGGCGGTTGAGATCGGAACTTGTTGGTGATAGATCTGCCTGTATGCTTCGTGTTGCATTGAATGGTGCTTAGATCTGTGGGATTGGTGATGGGATAGTCGGATTTGTCCATGTATTTGATACTTTCCCGGGTTGATTGCCATGGATTTGCGGGATATGGCATTA
CCTTTCTCTGTGCTGACTGCGGGGGGATGGGGATCTGGGTGGGGGTTCGCTACGATTCTCTGCTTGATGTGGAGACcGGGCGGTCGAGATCGGAACTTGTTGGTGATAGATCTGCCTGTATGCTTCGTGTTGCATTGAATGGTGCTTAGATCTGTGGGATTGGTGATGGGATAGTCGGATTTGTCCATGTATTTGATACTTTCCCGGGTTGATTGCCATGGATTTGCGGGATATGGCATTA	10	33	Insertion	0.02	1	PFSVLTAGGWGSGWGFATILCLMWRPGGRDRNLLVIDLPVCFVLH*	PFSVLTAGGWGSGWGFATILCLMWRRAVEIGTCW*	CCTTTCTCTGTGCTGACTGCGGGGGGATGGGGATCTGGGTGGGGGTTCGCTACGATTCTCTGCTTGATGTGGAGACCGGGCGGTCGAGATCGGAACTTGTTGGTGATAGATCTGCCTGTATGCTTCGTGTTGCATTGAATGGTGCTTAGATCTGTGGGATTGGTGATGGGATAGTCGGATTTGTCCATGTATTTGATACTTTCCCGGGTTGATTGCCATGGATTTGCGGGATATGGCATTA	CCTTTCTCTGTGCTGACTGCGGGGGGATGGGGATCTGGGTGGGGGTTCGCTACGATTCTCTGCTTGATGTGGAGACGGGCGGTTGAGATCGGAACTTGTTGGTGATAGATCTGCCTGTATGCTTCGTGTTGCATTGAATGGTGCTTAGATCTGTGGGATTGGTGATGGGATAGTCGGATTTGTCCATGTATTTGATACTTTCCCGGGTTGATTGCCATGGATTTGCGGGATATGGCATTA
CCTTTCTCTGTGCTGACTGCGGGGGGATGGGGATCTGGGTGGGGGTTCGCTACGATTCTCTGCTTGATGTGGAGACcGGGCGGTTGAGATCGGAACTTGCTGGTGATAGATCTGCCTGTATGCTTCGTGTTGCATTGAATGGTGCTTAGATCTGTGGGATTGGTGATGGGATAGTCGGATTTGTCCATGTATTTGATACTTTCCCGGGTTGATTGCCATGGATTTGCGGGATATGGCATTA	10	33	Insertion	0.02	1	PFSVLTAGGWGSGWGFATILCLMWRPGG*	PFSVLTAGGWGSGWGFATILCLMWRRAVEIGTCW*	CCTTTCTCTGTGCTGACTGCGGGGGGATGGGGATCTGGGTGGGGGTTCGCTACGATTCTCTGCTTGATGTGGAGACCGGGCGGTTGAGATCGGAACTTGCTGGTGATAGATCTGCCTGTATGCTTCGTGTTGCATTGAATGGTGCTTAGATCTGTGGGATTGGTGATGGGATAGTCGGATTTGTCCATGTATTTGATACTTTCCCGGGTTGATTGCCATGGATTTGCGGGATATGGCATTA	CCTTTCTCTGTGCTGACTGCGGGGGGATGGGGATCTGGGTGGGGGTTCGCTACGATTCTCTGCTTGATGTGGAGACGGGCGGTTGAGATCGGAACTTGTTGGTGATAGATCTGCCTGTATGCTTCGTGTTGCATTGAATGGTGCTTAGATCTGTGGGATTGGTGATGGGATAGTCGGATTTGTCCATGTATTTGATACTTTCCCGGGTTGATTGCCATGGATTTGCGGGATATGGCATTA
CCTTTCTCTGTGCTGACTGCGGGGGGATGGGGATCTGGGTGGGGGTTCGCTACGATTCTCTGCTTGATGTGGAGACcGGGCGGTTGAGATCGGAACTTGTTGGCGATAGATCTGCCTGTATGCTTCGTGTTGCATTGAATGGTGCTTAGATCTGTGGGATTGGTGATGGGATAGTCGGATTTGTCCATGTATTTGATACTTTCCCGGGTTGATTGCCATGGATTTGCGGGATATGGCATTA	10	33	Insertion	0.02	1	PFSVLTAGGWGSGWGFATILCLMWRPGG*	PFSVLTAGGWGSGWGFATILCLMWRRAVEIGTCW*	CCTTTCTCTGTGCTGACTGCGGGGGGATGGGGATCTGGGTGGGGGTTCGCTACGATTCTCTGCTTGATGTGGAGACCGGGCGGTTGAGATCGGAACTTGTTGGCGATAGATCTGCCTGTATGCTTCGTGTTGCATTGAATGGTGCTTAGATCTGTGGGATTGGTGATGGGATAGTCGGATTTGTCCATGTATTTGATACTTTCCCGGGTTGATTGCCATGGATTTGCGGGATATGGCATTA	CCTTTCTCTGTGCTGACTGCGGGGGGATGGGGATCTGGGTGGGGGTTCGCTACGATTCTCTGCTTGATGTGGAGACGGGCGGTTGAGATCGGAACTTGTTGGTGATAGATCTGCCTGTATGCTTCGTGTTGCATTGAATGGTGCTTAGATCTGTGGGATTGGTGATGGGATAGTCGGATTTGTCCATGTATTTGATACTTTCCCGGGTTGATTGCCATGGATTTGCGGGATATGGCATTA
CCTTTCTCTGTGCTGACTGCGGGGGGATGGGGATCTGGGTGGGGGTTCGCTACGATTCTCTGCTTGATGTGGAGACcGGGCGGTTGAGATCGGAACTTGTTGGTGATAGACCTGCCTGTATGCTTCGTGTTGCATTGAATGGTGCTTAGATCTGTGGGATTGGTGATGGGATAGTCGGATTTGTCCATGTATTTGATACTTTCCCGGGTTGATTGCCATGGATTTGCGGGATATGGCATTA	10	32	Insertion	0.02	1	PFSVLTAGGWGSGWGFATILCLMWRPGG*	PFSVLTAGGWGSGWGFATILCLMWRRAVEIGTCW*	CCTTTCTCTGTGCTGACTGCGGGGGGATGGGGATCTGGGTGGGGGTTCGCTACGATTCTCTGCTTGATGTGGAGACCGGGCGGTTGAGATCGGAACTTGTTGGTGATAGACCTGCCTGTATGCTTCGTGTTGCATTGAATGGTGCTTAGATCTGTGGGATTGGTGATGGGATAGTCGGATTTGTCCATGTATTTGATACTTTCCCGGGTTGATTGCCATGGATTTGCGGGATATGGCATTA	CCTTTCTCTGTGCTGACTGCGGGGGGATGGGGATCTGGGTGGGGGTTCGCTACGATTCTCTGCTTGATGTGGAGACGGGCGGTTGAGATCGGAACTTGTTGGTGATAGATCTGCCTGTATGCTTCGTGTTGCATTGAATGGTGCTTAGATCTGTGGGATTGGTGATGGGATAGTCGGATTTGTCCATGTATTTGATACTTTCCCGGGTTGATTGCCATGGATTTGCGGGATATGGCATTA
CCTTTCTCTGTGCTGACTGCGGGGGGATGGGGATCTGGGTGGGGGTTCGCTACGATTCTCTGCTTGATGTGGAGACcGGGCGGTTGAGATCGGAACTTGTTGGTGATAGATCTGCCTGTACGCTTCGTGTTGCATTGAATGGTGCTTAGATCTGTGGGATTGGTGATGGGATAGTCGGATTTGTCCATGTATTTGATACTTTCCCGGGTTGATTGCCATGGATTTGCGGGATATGGCATTA	10	33	Insertion	0.02	1	PFSVLTAGGWGSGWGFATILCLMWRPGG*	PFSVLTAGGWGSGWGFATILCLMWRRAVEIGTCW*	CCTTTCTCTGTGCTGACTGCGGGGGGATGGGGATCTGGGTGGGGGTTCGCTACGATTCTCTGCTTGATGTGGAGACCGGGCGGTTGAGATCGGAACTTGTTGGTGATAGATCTGCCTGTACGCTTCGTGTTGCATTGAATGGTGCTTAGATCTGTGGGATTGGTGATGGGATAGTCGGATTTGTCCATGTATTTGATACTTTCCCGGGTTGATTGCCATGGATTTGCGGGATATGGCATTA	CCTTTCTCTGTGCTGACTGCGGGGGGATGGGGATCTGGGTGGGGGTTCGCTACGATTCTCTGCTTGATGTGGAGACGGGCGGTTGAGATCGGAACTTGTTGGTGATAGATCTGCCTGTATGCTTCGTGTTGCATTGAATGGTGCTTAGATCTGTGGGATTGGTGATGGGATAGTCGGATTTGTCCATGTATTTGATACTTTCCCGGGTTGATTGCCATGGATTTGCGGGATATGGCATTA
CCTTTCTCTGTGCTGACTGCGGGGGGATGGGGATCTGGGTGGGGGTTCGCTACGATTCTCTGCTTGATGTGGAGACcGGGCGGTTGAGATCGGAACTTGTTGGTGATAGATCTGCCTGTATGCTTCGTGTTGCATTGAATGGTGCTTAGATCTGCGGGATTGGTGATGGGATAGTCGGATTTGTCCATGTATTTGATACTTTCCCGGGTTGATTGCCATGGATTTGCGGGATATGGCATTA	10	32	Insertion	0.02	1	PFSVLTAGGWGSGWGFATILCLMWRPGG*	PFSVLTAGGWGSGWGFATILCLMWRRAVEIGTCW*	CCTTTCTCTGTGCTGACTGCGGGGGGATGGGGATCTGGGTGGGGGTTCGCTACGATTCTCTGCTTGATGTGGAGACCGGGCGGTTGAGATCGGAACTTGTTGGTGATAGATCTGCCTGTATGCTTCGTGTTGCATTGAATGGTGCTTAGATCTGCGGGATTGGTGATGGGATAGTCGGATTTGTCCATGTATTTGATACTTTCCCGGGTTGATTGCCATGGATTTGCGGGATATGGCATTA	CCTTTCTCTGTGCTGACTGCGGGGGGATGGGGATCTGGGTGGGGGTTCGCTACGATTCTCTGCTTGATGTGGAGACGGGCGGTTGAGATCGGAACTTGTTGGTGATAGATCTGCCTGTATGCTTCGTGTTGCATTGAATGGTGCTTAGATCTGTGGGATTGGTGATGGGATAGTCGGATTTGTCCATGTATTTGATACTTTCCCGGGTTGATTGCCATGGATTTGCGGGATATGGCATTA
CCTTTCTCTGTGCTGACTGCGGGGGGATGGGGATCTGGGTGGGGGTTCGCTACGATTCTCTGCTTGATGTGGAGACcGGGCGGTTGAGATCGGAACTTGTTGGTGATAGATCTGCCTGTATGCTTCGTGTTGCATTGAATGGTGCTTAGATCTGTGGGATTGGTGATGGGATAGTCGGATTTGTCCACGTATTTGATACTTTCCCGGGTTGATTGCCATGGATTTGCGGGATATGGCATTA	10	32	Insertion	0.02	1	PFSVLTAGGWGSGWGFATILCLMWRPGG*	PFSVLTAGGWGSGWGFATILCLMWRRAVEIGTCW*	CCTTTCTCTGTGCTGACTGCGGGGGGATGGGGATCTGGGTGGGGGTTCGCTACGATTCTCTGCTTGATGTGGAGACCGGGCGGTTGAGATCGGAACTTGTTGGTGATAGATCTGCCTGTATGCTTCGTGTTGCATTGAATGGTGCTTAGATCTGTGGGATTGGTGATGGGATAGTCGGATTTGTCCACGTATTTGATACTTTCCCGGGTTGATTGCCATGGATTTGCGGGATATGGCATTA	CCTTTCTCTGTGCTGACTGCGGGGGGATGGGGATCTGGGTGGGGGTTCGCTACGATTCTCTGCTTGATGTGGAGACGGGCGGTTGAGATCGGAACTTGTTGGTGATAGATCTGCCTGTATGCTTCGTGTTGCATTGAATGGTGCTTAGATCTGTGGGATTGGTGATGGGATAGTCGGATTTGTCCATGTATTTGATACTTTCCCGGGTTGATTGCCATGGATTTGCGGGATATGGCATTA
CCTTTCTCTGTGCTGACTGCGGGGGGATGGGGATCTGGGTGGGGGTTCGCTACGATTCTCTGCTTGATGTGGAGACcGGGCGGTTGAGATCGGAACTTGTTGGTGATAGATCTGCCTGTATGCTTCGTGTTGCATTGAATGGTGCTTAGATCTGTGGGATTGGTGATGGGATAGTCGGATTTGTCCATGTACTTGATACTTTCCCGGGTTGATTGCCATGGATTTGCGGGATATGGCATTA	10	33	Insertion	0.02	1	PFSVLTAGGWGSGWGFATILCLMWRPGG*	PFSVLTAGGWGSGWGFATILCLMWRRAVEIGTCW*	CCTTTCTCTGTGCTGACTGCGGGGGGATGGGGATCTGGGTGGGGGTTCGCTACGATTCTCTGCTTGATGTGGAGACCGGGCGGTTGAGATCGGAACTTGTTGGTGATAGATCTGCCTGTATGCTTCGTGTTGCATTGAATGGTGCTTAGATCTGTGGGATTGGTGATGGGATAGTCGGATTTGTCCATGTACTTGATACTTTCCCGGGTTGATTGCCATGGATTTGCGGGATATGGCATTA	CCTTTCTCTGTGCTGACTGCGGGGGGATGGGGATCTGGGTGGGGGTTCGCTACGATTCTCTGCTTGATGTGGAGACGGGCGGTTGAGATCGGAACTTGTTGGTGATAGATCTGCCTGTATGCTTCGTGTTGCATTGAATGGTGCTTAGATCTGTGGGATTGGTGATGGGATAGTCGGATTTGTCCATGTATTTGATACTTTCCCGGGTTGATTGCCATGGATTTGCGGGATATGGCATTA
CCTTTCTCTGTGCTGACTGCGGGGGGATGGGGATCTGGGTGGGGGTTCGCTACGATTCTCTGCTTGATGTGGAGACcGGGCGGTTGAGATCGGAACTTGTTGGTGATAGATCTGCCTGTATGCTTCGTGTTGCATTGAATGGTGCTTAGATCTGTGGGATTGGTGATGGGATAGTCGGATTTGTCCATGTATTTGATACTTCCCCGGGTTGATTGCCATGGATTTGCGGGATATGGCATTA	10	33	Insertion	0.02	1	PFSVLTAGGWGSGWGFATILCLMWRPGG*	PFSVLTAGGWGSGWGFATILCLMWRRAVEIGTCW*	CCTTTCTCTGTGCTGACTGCGGGGGGATGGGGATCTGGGTGGGGGTTCGCTACGATTCTCTGCTTGATGTGGAGACCGGGCGGTTGAGATCGGAACTTGTTGGTGATAGATCTGCCTGTATGCTTCGTGTTGCATTGAATGGTGCTTAGATCTGTGGGATTGGTGATGGGATAGTCGGATTTGTCCATGTATTTGATACTTCCCCGGGTTGATTGCCATGGATTTGCGGGATATGGCATTA	CCTTTCTCTGTGCTGACTGCGGGGGGATGGGGATCTGGGTGGGGGTTCGCTACGATTCTCTGCTTGATGTGGAGACGGGCGGTTGAGATCGGAACTTGTTGGTGATAGATCTGCCTGTATGCTTCGTGTTGCATTGAATGGTGCTTAGATCTGTGGGATTGGTGATGGGATAGTCGGATTTGTCCATGTATTTGATACTTTCCCGGGTTGATTGCCATGGATTTGCGGGATATGGCATTA
CCTTTCTCTGTGCTGACTGCGGGGGGATGGGGATCTGGGTGGGGGTTCGCTACGATTCTCTGCTTGATGTGGAGACcGGGCGGTTGAGATCGGAACTTGTTGGTGATAGATCTGCCTGTATGCTTCGTGTTGCATTGAATGGTGCTTAGATCTGTGGGATTGGTGATGGGATAGTCGGATTTGTCCATGTATTTGATACTTTCCCGGGTTGATCGCCATGGATTTGCGGGATATGGCATTA	10	32	Insertion	0.02	1	PFSVLTAGGWGSGWGFATILCLMWRPGG*	PFSVLTAGGWGSGWGFATILCLMWRRAVEIGTCW*	CCTTTCTCTGTGCTGACTGCGGGGGGATGGGGATCTGGGTGGGGGTTCGCTACGATTCTCTGCTTGATGTGGAGACCGGGCGGTTGAGATCGGAACTTGTTGGTGATAGATCTGCCTGTATGCTTCGTGTTGCATTGAATGGTGCTTAGATCTGTGGGATTGGTGATGGGATAGTCGGATTTGTCCATGTATTTGATACTTTCCCGGGTTGATCGCCATGGATTTGCGGGATATGGCATTA	CCTTTCTCTGTGCTGACTGCGGGGGGATGGGGATCTGGGTGGGGGTTCGCTACGATTCTCTGCTTGATGTGGAGACGGGCGGTTGAGATCGGAACTTGTTGGTGATAGATCTGCCTGTATGCTTCGTGTTGCATTGAATGGTGCTTAGATCTGTGGGATTGGTGATGGGATAGTCGGATTTGTCCATGTATTTGATACTTTCCCGGGTTGATTGCCATGGATTTGCGGGATATGGCATTA
CCTTTCTCTGTGCTGACTGCGGGGGGATGGGGATCTGGGTGGGGGTTCGCTACGATTCTCTGCTTGATGTGGAGACcGGGCGGTTGAGATCGGAACTTGTTGGTGATGGATCTGCCTGTATGCTTCGTGTTGCATTGAATGGTGCTTAGATCTGTGGGATTGGTGATGGGATAGTCGGATTTGTCCATGTATTTGATACTTTCCCGGGTTGATTGCCATGGATTTGCGGGATATGGCATTA	10	33	Insertion	0.02	1	PFSVLTAGGWGSGWGFATILCLMWRPGG*	PFSVLTAGGWGSGWGFATILCLMWRRAVEIGTCW*	CCTTTCTCTGTGCTGACTGCGGGGGGATGGGGATCTGGGTGGGGGTTCGCTACGATTCTCTGCTTGATGTGGAGACCGGGCGGTTGAGATCGGAACTTGTTGGTGATGGATCTGCCTGTATGCTTCGTGTTGCATTGAATGGTGCTTAGATCTGTGGGATTGGTGATGGGATAGTCGGATTTGTCCATGTATTTGATACTTTCCCGGGTTGATTGCCATGGATTTGCGGGATATGGCATTA	CCTTTCTCTGTGCTGACTGCGGGGGGATGGGGATCTGGGTGGGGGTTCGCTACGATTCTCTGCTTGATGTGGAGACGGGCGGTTGAGATCGGAACTTGTTGGTGATAGATCTGCCTGTATGCTTCGTGTTGCATTGAATGGTGCTTAGATCTGTGGGATTGGTGATGGGATAGTCGGATTTGTCCATGTATTTGATACTTTCCCGGGTTGATTGCCATGGATTTGCGGGATATGGCATTA
CCTTTCTCTGTGCTGACTGCGGGGGGATGGGGATCTGGGTGGGGGTTCGCTACGATTCTCTGCTTGATGTGGAGACGGGCGGTTGAGATCGGAACTCGTTGGTGATAGATCTGCCTGTATGCTTCGTGTTGCATTGAATGGTGCTTAGATCTGTGGGATTGGTGATGGGATAGTCGGATTTGTCCATGTATTTGATACTTTCCCGGGTTGATTGCCATGGATTTGCGGGATATGGCATTA	10	32	1 Base Change	0.02	0	PFSVLTAGGWGSGWGFATILCLMWRRAVEIGTRW*	PFSVLTAGGWGSGWGFATILCLMWRRAVEIGTCW*	CCTTTCTCTGTGCTGACTGCGGGGGGATGGGGATCTGGGTGGGGGTTCGCTACGATTCTCTGCTTGATGTGGAGACGGGCGGTTGAGATCGGAACTCGTTGGTGATAGATCTGCCTGTATGCTTCGTGTTGCATTGAATGGTGCTTAGATCTGTGGGATTGGTGATGGGATAGTCGGATTTGTCCATGTATTTGATACTTTCCCGGGTTGATTGCCATGGATTTGCGGGATATGGCATTA	CCTTTCTCTGTGCTGACTGCGGGGGGATGGGGATCTGGGTGGGGGTTCGCTACGATTCTCTGCTTGATGTGGAGACGGGCGGTTGAGATCGGAACTTGTTGGTGATAGATCTGCCTGTATGCTTCGTGTTGCATTGAATGGTGCTTAGATCTGTGGGATTGGTGATGGGATAGTCGGATTTGTCCATGTATTTGATACTTTCCCGGGTTGATTGCCATGGATTTGCGGGATATGGCATTA
CCTTTCTCTGTGCTGACTGCGGGGGGATGGGGATCTGGGTGGGGGTTCGCTACGATTCTCTGCTTGATGTGGAGACGGGCGGTTGAGATCGGAACTTGTTAGTGATAGATCTGCCTGTATGCTTCGTGTTGCATTGAATGGTGCTTAGATCTGTGGGATTGGTGATGGGATAGTCGGATTTGTCCATGTATTTGATACTTTCCCGGGTTGATTGCCATGGATTTGCGGGATATGGCATTA	10	34	1 Base Change	0.02	0	PFSVLTAGGWGSGWGFATILCLMWRRAVEIGTC*	PFSVLTAGGWGSGWGFATILCLMWRRAVEIGTCW*	CCTTTCTCTGTGCTGACTGCGGGGGGATGGGGATCTGGGTGGGGGTTCGCTACGATTCTCTGCTTGATGTGGAGACGGGCGGTTGAGATCGGAACTTGTTAGTGATAGATCTGCCTGTATGCTTCGTGTTGCATTGAATGGTGCTTAGATCTGTGGGATTGGTGATGGGATAGTCGGATTTGTCCATGTATTTGATACTTTCCCGGGTTGATTGCCATGGATTTGCGGGATATGGCATTA	CCTTTCTCTGTGCTGACTGCGGGGGGATGGGGATCTGGGTGGGGGTTCGCTACGATTCTCTGCTTGATGTGGAGACGGGCGGTTGAGATCGGAACTTGTTGGTGATAGATCTGCCTGTATGCTTCGTGTTGCATTGAATGGTGCTTAGATCTGTGGGATTGGTGATGGGATAGTCGGATTTGTCCATGTATTTGATACTTTCCCGGGTTGATTGCCATGGATTTGCGGGATATGGCATTA
CCTTTCTCTGTGCTGACTGCGGGGGGATGGGGATCTGGGTGGGGGTTCGCTACGATTCTCTGCTTGATGTGGAGACGGGCGGTTGAGATCGGAACTTGTTGGTGATAGATCTGCCTGCATGCTTCGTGTTGCATTGAATGGTGCTTAGATCTGTGGGATTGGTGATGGGATAGTCGGATTTGTCCATGTATTTGATACTTTCCCGGGTTGATTGCCATGGATTTGCGGGATATGGCATTA	10	34	1 Base Change	0.02	0	PFSVLTAGGWGSGWGFATILCLMWRRAVEIGTCW*	PFSVLTAGGWGSGWGFATILCLMWRRAVEIGTCW*	CCTTTCTCTGTGCTGACTGCGGGGGGATGGGGATCTGGGTGGGGGTTCGCTACGATTCTCTGCTTGATGTGGAGACGGGCGGTTGAGATCGGAACTTGTTGGTGATAGATCTGCCTGCATGCTTCGTGTTGCATTGAATGGTGCTTAGATCTGTGGGATTGGTGATGGGATAGTCGGATTTGTCCATGTATTTGATACTTTCCCGGGTTGATTGCCATGGATTTGCGGGATATGGCATTA	CCTTTCTCTGTGCTGACTGCGGGGGGATGGGGATCTGGGTGGGGGTTCGCTACGATTCTCTGCTTGATGTGGAGACGGGCGGTTGAGATCGGAACTTGTTGGTGATAGATCTGCCTGTATGCTTCGTGTTGCATTGAATGGTGCTTAGATCTGTGGGATTGGTGATGGGATAGTCGGATTTGTCCATGTATTTGATACTTTCCCGGGTTGATTGCCATGGATTTGCGGGATATGGCATTA
CCTTTCTCTGTGCTGACTGCGGGGGGATGGGGATCTGGGTGGGGGTTCGCTACGATTCTCTGCTTGATGTGGAGACGGGCGGTTGAGATCGGAACTTGTTGGTGATAGATCTGCCTGTATGCTTCGTGTTGCATTGAATGGTGCTTAGATCTGTGGGATTGGTAATGGGATAGTCGGATTTGTCCATGTATTTGATACTTTCCCGGGTTGATTGCCATGGATTTGCGGGATATGGCATTA	10	33	1 Base Change	0.02	0	PFSVLTAGGWGSGWGFATILCLMWRRAVEIGTCW*	PFSVLTAGGWGSGWGFATILCLMWRRAVEIGTCW*	CCTTTCTCTGTGCTGACTGCGGGGGGATGGGGATCTGGGTGGGGGTTCGCTACGATTCTCTGCTTGATGTGGAGACGGGCGGTTGAGATCGGAACTTGTTGGTGATAGATCTGCCTGTATGCTTCGTGTTGCATTGAATGGTGCTTAGATCTGTGGGATTGGTAATGGGATAGTCGGATTTGTCCATGTATTTGATACTTTCCCGGGTTGATTGCCATGGATTTGCGGGATATGGCATTA	CCTTTCTCTGTGCTGACTGCGGGGGGATGGGGATCTGGGTGGGGGTTCGCTACGATTCTCTGCTTGATGTGGAGACGGGCGGTTGAGATCGGAACTTGTTGGTGATAGATCTGCCTGTATGCTTCGTGTTGCATTGAATGGTGCTTAGATCTGTGGGATTGGTGATGGGATAGTCGGATTTGTCCATGTATTTGATACTTTCCCGGGTTGATTGCCATGGATTTGCGGGATATGGCATTA
CCTTTCTCTGTGCTGACTGCGGGGGGATGGGGATCTGGGTGGGGGTTCGCTACGATTCTCTGCTTGATGTGGAGACGGGCGGTTGAGATCGGAACTTGTTGGTGATAGATCTGCCTGTATGCTTCGTGTTGCATTGAATGGTGCTTAGATCTGTGGGATTGGTGATGGGATAGTCGGATTTGTCCATGTATTTGATACTTTCCCGGGTTGATTGCCACGGATTTGCGGGATATGGCATTA	10	31	1 Base Change	0.02	0	PFSVLTAGGWGSGWGFATILCLMWRRAVEIGTCW*	PFSVLTAGGWGSGWGFATILCLMWRRAVEIGTCW*	CCTTTCTCTGTGCTGACTGCGGGGGGATGGGGATCTGGGTGGGGGTTCGCTACGATTCTCTGCTTGATGTGGAGACGGGCGGTTGAGATCGGAACTTGTTGGTGATAGATCTGCCTGTATGCTTCGTGTTGCATTGAATGGTGCTTAGATCTGTGGGATTGGTGATGGGATAGTCGGATTTGTCCATGTATTTGATACTTTCCCGGGTTGATTGCCACGGATTTGCGGGATATGGCATTA	CCTTTCTCTGTGCTGACTGCGGGGGGATGGGGATCTGGGTGGGGGTTCGCTACGATTCTCTGCTTGATGTGGAGACGGGCGGTTGAGATCGGAACTTGTTGGTGATAGATCTGCCTGTATGCTTCGTGTTGCATTGAATGGTGCTTAGATCTGTGGGATTGGTGATGGGATAGTCGGATTTGTCCATGTATTTGATACTTTCCCGGGTTGATTGCCATGGATTTGCGGGATATGGCATTA
CCTTTCTCTGTGCTGACTGCGGGGGGATGGGGATCTGGGTGGGGGTTCGCTACGATTCTCTGCTTGATGTGGAGACGGGCGGTTGAGATCGGAACTTGTTGGTGATAGATCTGCCTGTATGCTTCGTGTTGCATTGAATGGTGCTTAGATCTGTGGGATTGGTGATGGGATAGTCGGATTTGTCCATGTATTTGATACTTTCCCGGGTTGGTTGCCATGGATTTGCGGGATATGGCATTA	10	33	1 Base Change	0.02	0	PFSVLTAGGWGSGWGFATILCLMWRRAVEIGTCW*	PFSVLTAGGWGSGWGFATILCLMWRRAVEIGTCW*	CCTTTCTCTGTGCTGACTGCGGGGGGATGGGGATCTGGGTGGGGGTTCGCTACGATTCTCTGCTTGATGTGGAGACGGGCGGTTGAGATCGGAACTTGTTGGTGATAGATCTGCCTGTATGCTTCGTGTTGCATTGAATGGTGCTTAGATCTGTGGGATTGGTGATGGGATAGTCGGATTTGTCCATGTATTTGATACTTTCCCGGGTTGGTTGCCATGGATTTGCGGGATATGGCATTA	CCTTTCTCTGTGCTGACTGCGGGGGGATGGGGATCTGGGTGGGGGTTCGCTACGATTCTCTGCTTGATGTGGAGACGGGCGGTTGAGATCGGAACTTGTTGGTGATAGATCTGCCTGTATGCTTCGTGTTGCATTGAATGGTGCTTAGATCTGTGGGATTGGTGATGGGATAGTCGGATTTGTCCATGTATTTGATACTTTCCCGGGTTGATTGCCATGGATTTGCGGGATATGGCATTA
CCTTTCTCTGTGCTGACTGCGGGGGGATGGGGATCTGGGTGGGGGTTCGCTACGATTCTCTGCTTGATGTGGAGACTgGGCGGTTGAGATCGGAACTCGTTGGTGATAGATCTGCCTGTATGCTTCGTGTTGCATTGAATGGTGCTTAGATCTGTGGGATTGGTGATGGGATAGTCGGATTTGTCCATGTATTTGATACTTTCCCGGGTTGATTGCCATGGATTTGCGGGATATGGCATTA	10	32	Insertion	0.02	1	PFSVLTAGGWGSGWGFATILCLMWRLGG*	PFSVLTAGGWGSGWGFATILCLMWRRAVEIGTCW*	CCTTTCTCTGTGCTGACTGCGGGGGGATGGGGATCTGGGTGGGGGTTCGCTACGATTCTCTGCTTGATGTGGAGACTGGGCGGTTGAGATCGGAACTCGTTGGTGATAGATCTGCCTGTATGCTTCGTGTTGCATTGAATGGTGCTTAGATCTGTGGGATTGGTGATGGGATAGTCGGATTTGTCCATGTATTTGATACTTTCCCGGGTTGATTGCCATGGATTTGCGGGATATGGCATTA	CCTTTCTCTGTGCTGACTGCGGGGGGATGGGGATCTGGGTGGGGGTTCGCTACGATTCTCTGCTTGATGTGGAGACGGGCGGTTGAGATCGGAACTTGTTGGTGATAGATCTGCCTGTATGCTTCGTGTTGCATTGAATGGTGCTTAGATCTGTGGGATTGGTGATGGGATAGTCGGATTTGTCCATGTATTTGATACTTTCCCGGGTTGATTGCCATGGATTTGCGGGATATGGCATTA
CCTTTCTCTGTGCTGACTGCGGGGGGATGGGGATCTGGGTGGGGGTTCGCTACGATTCTCTGCTTGATGTGGAGACTgGGCGGTTGAGATCGGAACTTGTTGGCGATAGATCTGCCTGTATGCTTCGTGTTGCATTGAATGGTGCTTAGATCTGTGGGATTGGTGATGGGATAGTCGGATTTGTCCATGTATTTGATACTTTCCCGGGTTGATTGCCATGGATTTGCGGGATATGGCATTA	10	32	Insertion	0.02	1	PFSVLTAGGWGSGWGFATILCLMWRLGG*	PFSVLTAGGWGSGWGFATILCLMWRRAVEIGTCW*	CCTTTCTCTGTGCTGACTGCGGGGGGATGGGGATCTGGGTGGGGGTTCGCTACGATTCTCTGCTTGATGTGGAGACTGGGCGGTTGAGATCGGAACTTGTTGGCGATAGATCTGCCTGTATGCTTCGTGTTGCATTGAATGGTGCTTAGATCTGTGGGATTGGTGATGGGATAGTCGGATTTGTCCATGTATTTGATACTTTCCCGGGTTGATTGCCATGGATTTGCGGGATATGGCATTA	CCTTTCTCTGTGCTGACTGCGGGGGGATGGGGATCTGGGTGGGGGTTCGCTACGATTCTCTGCTTGATGTGGAGACGGGCGGTTGAGATCGGAACTTGTTGGTGATAGATCTGCCTGTATGCTTCGTGTTGCATTGAATGGTGCTTAGATCTGTGGGATTGGTGATGGGATAGTCGGATTTGTCCATGTATTTGATACTTTCCCGGGTTGATTGCCATGGATTTGCGGGATATGGCATTA
CCTTTCTCTGTGCTGACTGCGGGGGGATGGGGATCTGGGTGGGGGTTCGCTACGATTCTCTGCTTGATGTGGAGACTgGGCGGTTGAGATCGGAACTTGTTGGTGATAGATCTGCCTGTATGCTTCGTGTTGCATTGAATGGTGCTTAGATCTGTGGGATTGGTGATAGGATAGTCGGATTTGTCCATGTATTTGATACTTTCCCGGGTTGATTGCCATGGATTTGCGGGATATGGCATTA	10	33	Insertion	0.02	1	PFSVLTAGGWGSGWGFATILCLMWRLGG*	PFSVLTAGGWGSGWGFATILCLMWRRAVEIGTCW*	CCTTTCTCTGTGCTGACTGCGGGGGGATGGGGATCTGGGTGGGGGTTCGCTACGATTCTCTGCTTGATGTGGAGACTGGGCGGTTGAGATCGGAACTTGTTGGTGATAGATCTGCCTGTATGCTTCGTGTTGCATTGAATGGTGCTTAGATCTGTGGGATTGGTGATAGGATAGTCGGATTTGTCCATGTATTTGATACTTTCCCGGGTTGATTGCCATGGATTTGCGGGATATGGCATTA	CCTTTCTCTGTGCTGACTGCGGGGGGATGGGGATCTGGGTGGGGGTTCGCTACGATTCTCTGCTTGATGTGGAGACGGGCGGTTGAGATCGGAACTTGTTGGTGATAGATCTGCCTGTATGCTTCGTGTTGCATTGAATGGTGCTTAGATCTGTGGGATTGGTGATGGGATAGTCGGATTTGTCCATGTATTTGATACTTTCCCGGGTTGATTGCCATGGATTTGCGGGATATGGCATTA
CCTTTCTCTGTGCTGACTGCGGGGGGATGGGGATCTGGGTGGGGGTTCGCTACGATTCTCTGCTTGATGTGGAGACTgGGCGGTTGAGATCGGAACTTGTTGGTGATAGATCTGCCTGTATGCTTCGTGTTGCATTGAATGGTGCTTAGATCTGTGGGATTGGTGATGGGATAGTCGGATTTGTCCATGTATTTGATACTTTCCCGGGTCGATTGCCATGGATTTGCGGGATATGGCATTA	10	34	Insertion	0.02	1	PFSVLTAGGWGSGWGFATILCLMWRLGG*	PFSVLTAGGWGSGWGFATILCLMWRRAVEIGTCW*	CCTTTCTCTGTGCTGACTGCGGGGGGATGGGGATCTGGGTGGGGGTTCGCTACGATTCTCTGCTTGATGTGGAGACTGGGCGGTTGAGATCGGAACTTGTTGGTGATAGATCTGCCTGTATGCTTCGTGTTGCATTGAATGGTGCTTAGATCTGTGGGATTGGTGATGGGATAGTCGGATTTGTCCATGTATTTGATACTTTCCCGGGTCGATTGCCATGGATTTGCGGGATATGGCATTA	CCTTTCTCTGTGCTGACTGCGGGGGGATGGGGATCTGGGTGGGGGTTCGCTACGATTCTCTGCTTGATGTGGAGACGGGCGGTTGAGATCGGAACTTGTTGGTGATAGATCTGCCTGTATGCTTCGTGTTGCATTGAATGGTGCTTAGATCTGTGGGATTGGTGATGGGATAGTCGGATTTGTCCATGTATTTGATACTTTCCCGGGTTGATTGCCATGGATTTGCGGGATATGGCATTA
CCTTTCTCTGTGCTGACTGCGGGGGGATGGGGATCTGGGTGGGGGTTCGCTACGATTCTCTGCTTGATGTGGAGACTgGGCGGTTGAGATCGGAACTTGTTGGTGATAGATCTGCCTGTATGCTTCGTGTTGCATTGAATGGTGCTTAGATCTGTGGGATTGGTGATGGGATAGTCGGATTTGTCCATGTATTTGATACTTTCCCGGGTTGATTGCCACGGATTTGCGGGATATGGCATTA	10	33	Insertion	0.02	1	PFSVLTAGGWGSGWGFATILCLMWRLGG*	PFSVLTAGGWGSGWGFATILCLMWRRAVEIGTCW*	CCTTTCTCTGTGCTGACTGCGGGGGGATGGGGATCTGGGTGGGGGTTCGCTACGATTCTCTGCTTGATGTGGAGACTGGGCGGTTGAGATCGGAACTTGTTGGTGATAGATCTGCCTGTATGCTTCGTGTTGCATTGAATGGTGCTTAGATCTGTGGGATTGGTGATGGGATAGTCGGATTTGTCCATGTATTTGATACTTTCCCGGGTTGATTGCCACGGATTTGCGGGATATGGCATTA	CCTTTCTCTGTGCTGACTGCGGGGGGATGGGGATCTGGGTGGGGGTTCGCTACGATTCTCTGCTTGATGTGGAGACGGGCGGTTGAGATCGGAACTTGTTGGTGATAGATCTGCCTGTATGCTTCGTGTTGCATTGAATGGTGCTTAGATCTGTGGGATTGGTGATGGGATAGTCGGATTTGTCCATGTATTTGATACTTTCCCGGGTTGATTGCCATGGATTTGCGGGATATGGCATTA
CCTTTCTCTGTGCTGACTGCGGGGGGATGGGGATCTGGGTGGGGGTTCGCTACGATTCTCTGCTTGATGTGGAGACTgGGCGGTTGAGATCGGAACTTGTTGGTGATAGATCTGCCTGTATGCTTCGTGTTGCATTGAATGGTGCTTAGATCTGTGGGATTGGTGATGGGATGGTCGGATTTGTCCATGTATTTGATACTTTCCCGGGTTGATTGCCATGGATTTGCGGGATATGGCATTA	10	33	Insertion	0.02	1	PFSVLTAGGWGSGWGFATILCLMWRLGG*	PFSVLTAGGWGSGWGFATILCLMWRRAVEIGTCW*	CCTTTCTCTGTGCTGACTGCGGGGGGATGGGGATCTGGGTGGGGGTTCGCTACGATTCTCTGCTTGATGTGGAGACTGGGCGGTTGAGATCGGAACTTGTTGGTGATAGATCTGCCTGTATGCTTCGTGTTGCATTGAATGGTGCTTAGATCTGTGGGATTGGTGATGGGATGGTCGGATTTGTCCATGTATTTGATACTTTCCCGGGTTGATTGCCATGGATTTGCGGGATATGGCATTA	CCTTTCTCTGTGCTGACTGCGGGGGGATGGGGATCTGGGTGGGGGTTCGCTACGATTCTCTGCTTGATGTGGAGACGGGCGGTTGAGATCGGAACTTGTTGGTGATAGATCTGCCTGTATGCTTCGTGTTGCATTGAATGGTGCTTAGATCTGTGGGATTGGTGATGGGATAGTCGGATTTGTCCATGTATTTGATACTTTCCCGGGTTGATTGCCATGGATTTGCGGGATATGGCATTA
CCTTTCTCTGTGCTGACTGCGGGGGGATGGGGATCTGGGTGGGGGTTCGCTACGATTCTCTGCTTGGTGTGG---CGGGCGGTTGAGATCGGAACTTGTTGGTGATAGATCTGCCTGTATGCTTCGTGTTGCATTGAATGGTGCTTAGATCTGTGGGATTGGTGATGGGATAGTCGGATTTGTCCATGTATTTGATACTTTCCCGGGTTGATTGCCATGGATTTGCGGGATATGGCATTA	10	28	Deletion	0.02	-3	PFSVLTAGGWGSGWGFATILCLVWRAVEIGTCW*	PFSVLTAGGWGSGWGFATILCLMWRRAVEIGTCW*	CCTTTCTCTGTGCTGACTGCGGGGGGATGGGGATCTGGGTGGGGGTTCGCTACGATTCTCTGCTTGGTGTGG---CGGGCGGTTGAGATCGGAACTTGTTGGTGATAGATCTGCCTGTATGCTTCGTGTTGCATTGAATGGTGCTTAGATCTGTGGGATTGGTGATGGGATAGTCGGATTTGTCCATGTATTTGATACTTTCCCGGGTTGATTGCCATGGATTTGCGGGATATGGCATTA	CCTTTCTCTGTGCTGACTGCGGGGGGATGGGGATCTGGGTGGGGGTTCGCTACGATTCTCTGCTTGATGTGGAGACGGGCGGTTGAGATCGGAACTTGTTGGTGATAGATCTGCCTGTATGCTTCGTGTTGCATTGAATGGTGCTTAGATCTGTGGGATTGGTGATGGGATAGTCGGATTTGTCCATGTATTTGATACTTTCCCGGGTTGATTGCCATGGATTTGCGGGATATGGCATTA
CCTTTCTCTGTGCTGACTGCGGGGGGATGGGGATCTGGGTGGGGGTTCGCTACGATTCTCTGCTTGGTGTGGAGACcGGGCGGTTGAGATCGGAACTTGTTGGTGATAGATCTGCCTGTATGCTTCGTGTTGCATTGAATGGTGCTTAGATCTGTGGGATTGGTGATGGGATAGTCGGATTTGTCCATGTATTTGATACTTTCCCGGGTTGATTGCCATGGATTTGCGGGATATGGCATTA	10	33	Insertion	0.02	1	PFSVLTAGGWGSGWGFATILCLVWRPGG*	PFSVLTAGGWGSGWGFATILCLMWRRAVEIGTCW*	CCTTTCTCTGTGCTGACTGCGGGGGGATGGGGATCTGGGTGGGGGTTCGCTACGATTCTCTGCTTGGTGTGGAGACCGGGCGGTTGAGATCGGAACTTGTTGGTGATAGATCTGCCTGTATGCTTCGTGTTGCATTGAATGGTGCTTAGATCTGTGGGATTGGTGATGGGATAGTCGGATTTGTCCATGTATTTGATACTTTCCCGGGTTGATTGCCATGGATTTGCGGGATATGGCATTA	CCTTTCTCTGTGCTGACTGCGGGGGGATGGGGATCTGGGTGGGGGTTCGCTACGATTCTCTGCTTGATGTGGAGACGGGCGGTTGAGATCGGAACTTGTTGGTGATAGATCTGCCTGTATGCTTCGTGTTGCATTGAATGGTGCTTAGATCTGTGGGATTGGTGATGGGATAGTCGGATTTGTCCATGTATTTGATACTTTCCCGGGTTGATTGCCATGGATTTGCGGGATATGGCATTA
CCTTTCTCTGTGCTGACTGCGGGGGGATGGGGATCTGGGTGGGGGTTCGCTGCGATTCTCTGCTTGATGTGGAGACGGGCGGTTGAGATCGGAACTTGTTGGTGATAGATCTGCCTGTATGCTTCGTGTTGCATTGAATGGTGCTTAGATCTGTGGGATTGGTGATGGGATAGTCGGATTTGTCCATGTATTTGATACTTTCCCGGGTTGATTGCCATGGATTTGCGGGATATGGCATTA	10	31	1 Base Change	0.02	0	PFSVLTAGGWGSGWGFAAILCLMWRRAVEIGTCW*	PFSVLTAGGWGSGWGFATILCLMWRRAVEIGTCW*	CCTTTCTCTGTGCTGACTGCGGGGGGATGGGGATCTGGGTGGGGGTTCGCTGCGATTCTCTGCTTGATGTGGAGACGGGCGGTTGAGATCGGAACTTGTTGGTGATAGATCTGCCTGTATGCTTCGTGTTGCATTGAATGGTGCTTAGATCTGTGGGATTGGTGATGGGATAGTCGGATTTGTCCATGTATTTGATACTTTCCCGGGTTGATTGCCATGGATTTGCGGGATATGGCATTA	CCTTTCTCTGTGCTGACTGCGGGGGGATGGGGATCTGGGTGGGGGTTCGCTACGATTCTCTGCTTGATGTGGAGACGGGCGGTTGAGATCGGAACTTGTTGGTGATAGATCTGCCTGTATGCTTCGTGTTGCATTGAATGGTGCTTAGATCTGTGGGATTGGTGATGGGATAGTCGGATTTGTCCATGTATTTGATACTTTCCCGGGTTGATTGCCATGGATTTGCGGGATATGGCATTA
CCTTTCT-TGTGCTGACTGCGGGGGGATGGGGATCTGGGTGGGGGTTCGCTACGATTCTCTGCTTGATGTGG---CGGGCGGTTGAGATCGGAACTTGTTGGTGATAGATCTGCCTGTATGCTTCGTGTTGCATTGAATGGTGCTTAGATCTGTGGGATTGGTGATGGGATAGTCGGATTTGTCCATGTATTTGATACTTTCCCGGGTTGATTGCCATGGATTTGCGGGATATGGCATTA	9	31	Deletion	0.01	-4	PFLC*	PFSVLTAGGWGSGWGFATILCLMWRRAVEIGTCW*	CCTTTCT-TGTGCTGACTGCGGGGGGATGGGGATCTGGGTGGGGGTTCGCTACGATTCTCTGCTTGATGTGG---CGGGCGGTTGAGATCGGAACTTGTTGGTGATAGATCTGCCTGTATGCTTCGTGTTGCATTGAATGGTGCTTAGATCTGTGGGATTGGTGATGGGATAGTCGGATTTGTCCATGTATTTGATACTTTCCCGGGTTGATTGCCATGGATTTGCGGGATATGGCATTA	CCTTTCTCTGTGCTGACTGCGGGGGGATGGGGATCTGGGTGGGGGTTCGCTACGATTCTCTGCTTGATGTGGAGACGGGCGGTTGAGATCGGAACTTGTTGGTGATAGATCTGCCTGTATGCTTCGTGTTGCATTGAATGGTGCTTAGATCTGTGGGATTGGTGATGGGATAGTCGGATTTGTCCATGTATTTGATACTTTCCCGGGTTGATTGCCATGGATTTGCGGGATATGGCATTA
CCTTTCTCTGTGCTGACTGCGGGGGGACGGGGATCTGGGTGGGGGTTCGCTACGATTCTCTGCTTGATGTGGAGACcGGGCGGTTGAGATCGGAACTTGTTGGTGATAGATCTGCCTGTATGCTTCGTGTTGCATTGAATGGTGCTTAGATCTGTGGGATTGGTGATGGGATAGTCGGATTTGTCCATGTATTTGATACTTTCCCGGGTTGATTGCCATGGATTTGCGGGATATGGCATTA	9	32	Insertion	0.01	1	PFSVLTAGGRGSGWGFATILCLMWRPGG*	PFSVLTAGGWGSGWGFATILCLMWRRAVEIGTCW*	CCTTTCTCTGTGCTGACTGCGGGGGGACGGGGATCTGGGTGGGGGTTCGCTACGATTCTCTGCTTGATGTGGAGACCGGGCGGTTGAGATCGGAACTTGTTGGTGATAGATCTGCCTGTATGCTTCGTGTTGCATTGAATGGTGCTTAGATCTGTGGGATTGGTGATGGGATAGTCGGATTTGTCCATGTATTTGATACTTTCCCGGGTTGATTGCCATGGATTTGCGGGATATGGCATTA	CCTTTCTCTGTGCTGACTGCGGGGGGATGGGGATCTGGGTGGGGGTTCGCTACGATTCTCTGCTTGATGTGGAGACGGGCGGTTGAGATCGGAACTTGTTGGTGATAGATCTGCCTGTATGCTTCGTGTTGCATTGAATGGTGCTTAGATCTGTGGGATTGGTGATGGGATAGTCGGATTTGTCCATGTATTTGATACTTTCCCGGGTTGATTGCCATGGATTTGCGGGATATGGCATTA
CCTTTCTCTGTGCTGACTGCGGGGGGATGGGGACCTGGGTGGGGGTTCGCTACGATTCTCTGCTTGATGTGG---CGGGCGGTTGAGATCGGAACTTGTTGGTGATAGATCTGCCTGTATGCTTCGTGTTGCATTGAATGGTGCTTAGATCTGTGGGATTGGTGATGGGATAGTCGGATTTGTCCATGTATTTGATACTTTCCCGGGTTGATTGCCATGGATTTGCGGGATATGGCATTA	9	29	Deletion	0.01	-3	PFSVLTAGGWGPGWGFATILCLMWRAVEIGTCW*	PFSVLTAGGWGSGWGFATILCLMWRRAVEIGTCW*	CCTTTCTCTGTGCTGACTGCGGGGGGATGGGGACCTGGGTGGGGGTTCGCTACGATTCTCTGCTTGATGTGG---CGGGCGGTTGAGATCGGAACTTGTTGGTGATAGATCTGCCTGTATGCTTCGTGTTGCATTGAATGGTGCTTAGATCTGTGGGATTGGTGATGGGATAGTCGGATTTGTCCATGTATTTGATACTTTCCCGGGTTGATTGCCATGGATTTGCGGGATATGGCATTA	CCTTTCTCTGTGCTGACTGCGGGGGGATGGGGATCTGGGTGGGGGTTCGCTACGATTCTCTGCTTGATGTGGAGACGGGCGGTTGAGATCGGAACTTGTTGGTGATAGATCTGCCTGTATGCTTCGTGTTGCATTGAATGGTGCTTAGATCTGTGGGATTGGTGATGGGATAGTCGGATTTGTCCATGTATTTGATACTTTCCCGGGTTGATTGCCATGGATTTGCGGGATATGGCATTA
CCTTTCTCTGTGCTGACTGCGGGGGGATGGGGATCCGGGTGGGGGTTCGCTACGATTCTCTGCTTGATGTGGAGACTgGGCGGTTGAGATCGGAACTTGTTGGTGATAGATCTGCCTGTATGCTTCGTGTTGCATTGAATGGTGCTTAGATCTGTGGGATTGGTGATGGGATAGTCGGATTTGTCCATGTATTTGATACTTTCCCGGGTTGATTGCCATGGATTTGCGGGATATGGCATTA	9	33	Insertion	0.01	1	PFSVLTAGGWGSGWGFATILCLMWRLGG*	PFSVLTAGGWGSGWGFATILCLMWRRAVEIGTCW*	CCTTTCTCTGTGCTGACTGCGGGGGGATGGGGATCCGGGTGGGGGTTCGCTACGATTCTCTGCTTGATGTGGAGACTGGGCGGTTGAGATCGGAACTTGTTGGTGATAGATCTGCCTGTATGCTTCGTGTTGCATTGAATGGTGCTTAGATCTGTGGGATTGGTGATGGGATAGTCGGATTTGTCCATGTATTTGATACTTTCCCGGGTTGATTGCCATGGATTTGCGGGATATGGCATTA	CCTTTCTCTGTGCTGACTGCGGGGGGATGGGGATCTGGGTGGGGGTTCGCTACGATTCTCTGCTTGATGTGGAGACGGGCGGTTGAGATCGGAACTTGTTGGTGATAGATCTGCCTGTATGCTTCGTGTTGCATTGAATGGTGCTTAGATCTGTGGGATTGGTGATGGGATAGTCGGATTTGTCCATGTATTTGATACTTTCCCGGGTTGATTGCCATGGATTTGCGGGATATGGCATTA
CCTTTCTCTGTGCTGACTGCGGGGGGATGGGGATCTGGGTAGGGGTTCGCTACGATTCTCTGCTTGATGTGGAGACcGGGCGGTTGAGATCGGAACTTGTTGGTGATAGATCTGCCTGTATGCTTCGTGTTGCATTGAATGGTGCTTAGATCTGTGGGATTGGTGATGGGATAGTCGGATTTGTCCATGTATTTGATACTTTCCCGGGTTGATTGCCATGGATTTGCGGGATATGGCATTA	9	32	Insertion	0.01	1	PFSVLTAGGWGSG*	PFSVLTAGGWGSGWGFATILCLMWRRAVEIGTCW*	CCTTTCTCTGTGCTGACTGCGGGGGGATGGGGATCTGGGTAGGGGTTCGCTACGATTCTCTGCTTGATGTGGAGACCGGGCGGTTGAGATCGGAACTTGTTGGTGATAGATCTGCCTGTATGCTTCGTGTTGCATTGAATGGTGCTTAGATCTGTGGGATTGGTGATGGGATAGTCGGATTTGTCCATGTATTTGATACTTTCCCGGGTTGATTGCCATGGATTTGCGGGATATGGCATTA	CCTTTCTCTGTGCTGACTGCGGGGGGATGGGGATCTGGGTGGGGGTTCGCTACGATTCTCTGCTTGATGTGGAGACGGGCGGTTGAGATCGGAACTTGTTGGTGATAGATCTGCCTGTATGCTTCGTGTTGCATTGAATGGTGCTTAGATCTGTGGGATTGGTGATGGGATAGTCGGATTTGTCCATGTATTTGATACTTTCCCGGGTTGATTGCCATGGATTTGCGGGATATGGCATTA
CCTTTCTCTGTGCTGACTGCGGGGGGATGGGGATCTGGGTGGGGGTTCGCTACGATCCTCTGCTTGATGTGGAGACcGGGCGGTTGAGATCGGAACTTGTTGGTGATAGATCTGCCTGTATGCTTCGTGTTGCATTGAATGGTGCTTAGATCTGTGGGATTGGTGATGGGATAGTCGGATTTGTCCATGTATTTGATACTTTCCCGGGTTGATTGCCATGGATTTGCGGGATATGGCATTA	9	33	Insertion	0.01	1	PFSVLTAGGWGSGWGFATILCLMWRPGG*	PFSVLTAGGWGSGWGFATILCLMWRRAVEIGTCW*	CCTTTCTCTGTGCTGACTGCGGGGGGATGGGGATCTGGGTGGGGGTTCGCTACGATCCTCTGCTTGATGTGGAGACCGGGCGGTTGAGATCGGAACTTGTTGGTGATAGATCTGCCTGTATGCTTCGTGTTGCATTGAATGGTGCTTAGATCTGTGGGATTGGTGATGGGATAGTCGGATTTGTCCATGTATTTGATACTTTCCCGGGTTGATTGCCATGGATTTGCGGGATATGGCATTA	CCTTTCTCTGTGCTGACTGCGGGGGGATGGGGATCTGGGTGGGGGTTCGCTACGATTCTCTGCTTGATGTGGAGACGGGCGGTTGAGATCGGAACTTGTTGGTGATAGATCTGCCTGTATGCTTCGTGTTGCATTGAATGGTGCTTAGATCTGTGGGATTGGTGATGGGATAGTCGGATTTGTCCATGTATTTGATACTTTCCCGGGTTGATTGCCATGGATTTGCGGGATATGGCATTA
CCTTTCTCTGTGCTGACTGCGGGGGGATGGGGATCTGGGTGGGGGTTCGCTACGATTCCCTGCTTGATGTGGAGACTgGGCGGTTGAGATCGGAACTTGTTGGTGATAGATCTGCCTGTATGCTTCGTGTTGCATTGAATGGTGCTTAGATCTGTGGGATTGGTGATGGGATAGTCGGATTTGTCCATGTATTTGATACTTTCCCGGGTTGATTGCCATGGATTTGCGGGATATGGCATTA	9	34	Insertion	0.01	1	PFSVLTAGGWGSGWGFATIPCLMWRLGG*	PFSVLTAGGWGSGWGFATILCLMWRRAVEIGTCW*	CCTTTCTCTGTGCTGACTGCGGGGGGATGGGGATCTGGGTGGGGGTTCGCTACGATTCCCTGCTTGATGTGGAGACTGGGCGGTTGAGATCGGAACTTGTTGGTGATAGATCTGCCTGTATGCTTCGTGTTGCATTGAATGGTGCTTAGATCTGTGGGATTGGTGATGGGATAGTCGGATTTGTCCATGTATTTGATACTTTCCCGGGTTGATTGCCATGGATTTGCGGGATATGGCATTA	CCTTTCTCTGTGCTGACTGCGGGGGGATGGGGATCTGGGTGGGGGTTCGCTACGATTCTCTGCTTGATGTGGAGACGGGCGGTTGAGATCGGAACTTGTTGGTGATAGATCTGCCTGTATGCTTCGTGTTGCATTGAATGGTGCTTAGATCTGTGGGATTGGTGATGGGATAGTCGGATTTGTCCATGTATTTGATACTTTCCCGGGTTGATTGCCATGGATTTGCGGGATATGGCATTA
CCTTTCTCTGTGCTGACTGCGGGGGGATGGGGATCTGGGTGGGGGTTCGCTACGATTCTCTGCTTAATGTGGAGACTgGGCGGTTGAGATCGGAACTTGTTGGTGATAGATCTGCCTGTATGCTTCGTGTTGCATTGAATGGTGCTTAGATCTGTGGGATTGGTGATGGGATAGTCGGATTTGTCCATGTATTTGATACTTTCCCGGGTTGATTGCCATGGATTTGCGGGATATGGCATTA	9	34	Insertion	0.01	1	PFSVLTAGGWGSGWGFATILCLMWRLGG*	PFSVLTAGGWGSGWGFATILCLMWRRAVEIGTCW*	CCTTTCTCTGTGCTGACTGCGGGGGGATGGGGATCTGGGTGGGGGTTCGCTACGATTCTCTGCTTAATGTGGAGACTGGGCGGTTGAGATCGGAACTTGTTGGTGATAGATCTGCCTGTATGCTTCGTGTTGCATTGAATGGTGCTTAGATCTGTGGGATTGGTGATGGGATAGTCGGATTTGTCCATGTATTTGATACTTTCCCGGGTTGATTGCCATGGATTTGCGGGATATGGCATTA	CCTTTCTCTGTGCTGACTGCGGGGGGATGGGGATCTGGGTGGGGGTTCGCTACGATTCTCTGCTTGATGTGGAGACGGGCGGTTGAGATCGGAACTTGTTGGTGATAGATCTGCCTGTATGCTTCGTGTTGCATTGAATGGTGCTTAGATCTGTGGGATTGGTGATGGGATAGTCGGATTTGTCCATGTATTTGATACTTTCCCGGGTTGATTGCCATGGATTTGCGGGATATGGCATTA
CCTTTCTCTGTGCTGACTGCGGGGGGATGGGGATCTGGGTGGGGGTTCGCTACGATTCTCTGCTTGATGTGG----GGGCGGTTGAGATCGGAACTTGTTGGTGATAGATCTGCCTGTATGCTTCGTGTTGCATTGAATGGTGCTTAGATCTGTGGGATTGGTGATGGGATAGTCGGATTTGTCCATGTATTTGATACTTTCCCGGGTTGATTGCCATGGATTTGCGGGATATGGC-TTA	9	32	Deletion	0.01	-5	PFSVLTAGGWGSGWGFATILCLMWGRLRSELVGDRSACMLRVALNGA*	PFSVLTAGGWGSGWGFATILCLMWRRAVEIGTCW*	CCTTTCTCTGTGCTGACTGCGGGGGGATGGGGATCTGGGTGGGGGTTCGCTACGATTCTCTGCTTGATGTGG----GGGCGGTTGAGATCGGAACTTGTTGGTGATAGATCTGCCTGTATGCTTCGTGTTGCATTGAATGGTGCTTAGATCTGTGGGATTGGTGATGGGATAGTCGGATTTGTCCATGTATTTGATACTTTCCCGGGTTGATTGCCATGGATTTGCGGGATATGGC-TTA	CCTTTCTCTGTGCTGACTGCGGGGGGATGGGGATCTGGGTGGGGGTTCGCTACGATTCTCTGCTTGATGTGGAGACGGGCGGTTGAGATCGGAACTTGTTGGTGATAGATCTGCCTGTATGCTTCGTGTTGCATTGAATGGTGCTTAGATCTGTGGGATTGGTGATGGGATAGTCGGATTTGTCCATGTATTTGATACTTTCCCGGGTTGATTGCCATGGATTTGCGGGATATGGCATTA
CCTTTCTCTGTGCTGACTGCGGGGGGATGGGGATCTGGGTGGGGGTTCGCTACGATTCTCTGCTTGATGTGG----GGGCGGTTGAGATCGGAACTTGTTGGTGATAGATCTGCCTGTATGCTTCGTGTTGCATTGAATGGTGCTTAGATCTGTGGGATTGGTGATGGGATAGTCGGATTTGTCCATGTATTTGATACTTTCCCGGGTTGATTGCCATGGATTTGTGGGATATGGCATTA	9	32	Deletion	0.01	-4	PFSVLTAGGWGSGWGFATILCLMWGRLRSELVGDRSACMLRVALNGA*	PFSVLTAGGWGSGWGFATILCLMWRRAVEIGTCW*	CCTTTCTCTGTGCTGACTGCGGGGGGATGGGGATCTGGGTGGGGGTTCGCTACGATTCTCTGCTTGATGTGG----GGGCGGTTGAGATCGGAACTTGTTGGTGATAGATCTGCCTGTATGCTTCGTGTTGCATTGAATGGTGCTTAGATCTGTGGGATTGGTGATGGGATAGTCGGATTTGTCCATGTATTTGATACTTTCCCGGGTTGATTGCCATGGATTTGTGGGATATGGCATTA	CCTTTCTCTGTGCTGACTGCGGGGGGATGGGGATCTGGGTGGGGGTTCGCTACGATTCTCTGCTTGATGTGGAGACGGGCGGTTGAGATCGGAACTTGTTGGTGATAGATCTGCCTGTATGCTTCGTGTTGCATTGAATGGTGCTTAGATCTGTGGGATTGGTGATGGGATAGTCGGATTTGTCCATGTATTTGATACTTTCCCGGGTTGATTGCCATGGATTTGCGGGATATGGCATTA
CCTTTCTCTGTGCTGACTGCGGGGGGATGGGGATCTGGGTGGGGGTTCGCTACGATTCTCTGCTTGATGTGG---CGGGCGGTTGAGATCGGAACTTGTTGGTGATAGATCTGCCTGTATGCCTCGTGTTGCATTGAATGGTGCTTAGATCTGTGGGATTGGTGATGGGATAGTCGGATTTGTCCATGTATTTGATACTTTCCCGGGTTGATTGCCATGGATTTGCGGGATATGGCATTA	9	28	Deletion	0.01	-3	PFSVLTAGGWGSGWGFATILCLMWRAVEIGTCW*	PFSVLTAGGWGSGWGFATILCLMWRRAVEIGTCW*	CCTTTCTCTGTGCTGACTGCGGGGGGATGGGGATCTGGGTGGGGGTTCGCTACGATTCTCTGCTTGATGTGG---CGGGCGGTTGAGATCGGAACTTGTTGGTGATAGATCTGCCTGTATGCCTCGTGTTGCATTGAATGGTGCTTAGATCTGTGGGATTGGTGATGGGATAGTCGGATTTGTCCATGTATTTGATACTTTCCCGGGTTGATTGCCATGGATTTGCGGGATATGGCATTA	CCTTTCTCTGTGCTGACTGCGGGGGGATGGGGATCTGGGTGGGGGTTCGCTACGATTCTCTGCTTGATGTGGAGACGGGCGGTTGAGATCGGAACTTGTTGGTGATAGATCTGCCTGTATGCTTCGTGTTGCATTGAATGGTGCTTAGATCTGTGGGATTGGTGATGGGATAGTCGGATTTGTCCATGTATTTGATACTTTCCCGGGTTGATTGCCATGGATTTGCGGGATATGGCATTA
CCTTTCTCTGTGCTGACTGCGGGGGGATGGGGATCTGGGTGGGGGTTCGCTACGATTCTCTGCTTGATGTGG---CGGGCGGTTGAGATCGGAACTTGTTGGTGATAGATCTGCCTGTATGCTTCGTGTTGCATTGAATGGTGCTTAGATCTGCGGGATTGGTGATGGGATAGTCGGATTTGTCCATGTATTTGATACTTTCCCGGGTTGATTGCCATGGATTTGCGGGATATGGCATTA	9	29	Deletion	0.01	-3	PFSVLTAGGWGSGWGFATILCLMWRAVEIGTCW*	PFSVLTAGGWGSGWGFATILCLMWRRAVEIGTCW*	CCTTTCTCTGTGCTGACTGCGGGGGGATGGGGATCTGGGTGGGGGTTCGCTACGATTCTCTGCTTGATGTGG---CGGGCGGTTGAGATCGGAACTTGTTGGTGATAGATCTGCCTGTATGCTTCGTGTTGCATTGAATGGTGCTTAGATCTGCGGGATTGGTGATGGGATAGTCGGATTTGTCCATGTATTTGATACTTTCCCGGGTTGATTGCCATGGATTTGCGGGATATGGCATTA	CCTTTCTCTGTGCTGACTGCGGGGGGATGGGGATCTGGGTGGGGGTTCGCTACGATTCTCTGCTTGATGTGGAGACGGGCGGTTGAGATCGGAACTTGTTGGTGATAGATCTGCCTGTATGCTTCGTGTTGCATTGAATGGTGCTTAGATCTGTGGGATTGGTGATGGGATAGTCGGATTTGTCCATGTATTTGATACTTTCCCGGGTTGATTGCCATGGATTTGCGGGATATGGCATTA
CCTTTCTCTGTGCTGACTGCGGGGGGATGGGGATCTGGGTGGGGGTTCGCTACGATTCTCTGCTTGATGTGG---CGGGCGGTTGAGATCGGAACTTGTTGGTGATAGATCTGCCTGTATGCTTCGTGTTGCATTGAATGGTGCTTAGATCTGTGGGATTGGTGATGGGATAGTCGGATCTGTCCATGTATTTGATACTTTCCCGGGTTGATTGCCATGGATTTGCGGGATATGGCATTA	9	28	Deletion	0.01	-3	PFSVLTAGGWGSGWGFATILCLMWRAVEIGTCW*	PFSVLTAGGWGSGWGFATILCLMWRRAVEIGTCW*	CCTTTCTCTGTGCTGACTGCGGGGGGATGGGGATCTGGGTGGGGGTTCGCTACGATTCTCTGCTTGATGTGG---CGGGCGGTTGAGATCGGAACTTGTTGGTGATAGATCTGCCTGTATGCTTCGTGTTGCATTGAATGGTGCTTAGATCTGTGGGATTGGTGATGGGATAGTCGGATCTGTCCATGTATTTGATACTTTCCCGGGTTGATTGCCATGGATTTGCGGGATATGGCATTA	CCTTTCTCTGTGCTGACTGCGGGGGGATGGGGATCTGGGTGGGGGTTCGCTACGATTCTCTGCTTGATGTGGAGACGGGCGGTTGAGATCGGAACTTGTTGGTGATAGATCTGCCTGTATGCTTCGTGTTGCATTGAATGGTGCTTAGATCTGTGGGATTGGTGATGGGATAGTCGGATTTGTCCATGTATTTGATACTTTCCCGGGTTGATTGCCATGGATTTGCGGGATATGGCATTA
CCTTTCTCTGTGCTGACTGCGGGGGGATGGGGATCTGGGTGGGGGTTCGCTACGATTCTCTGCTTGATGTGG---CGGGCGGTTGAGATCGGAACTTGTTGGTGATAGATCTGCCTGTATGCTTCGTGTTGCATTGAATGGTGCTTAGATCTGTGGGATTGGTGATGGGATAGTCGGATTTGTCCACGTATTTGATACTTTCCCGGGTTGATTGCCATGGATTTGCGGGATATGGCATTA	9	28	Deletion	0.01	-3	PFSVLTAGGWGSGWGFATILCLMWRAVEIGTCW*	PFSVLTAGGWGSGWGFATILCLMWRRAVEIGTCW*	CCTTTCTCTGTGCTGACTGCGGGGGGATGGGGATCTGGGTGGGGGTTCGCTACGATTCTCTGCTTGATGTGG---CGGGCGGTTGAGATCGGAACTTGTTGGTGATAGATCTGCCTGTATGCTTCGTGTTGCATTGAATGGTGCTTAGATCTGTGGGATTGGTGATGGGATAGTCGGATTTGTCCACGTATTTGATACTTTCCCGGGTTGATTGCCATGGATTTGCGGGATATGGCATTA	CCTTTCTCTGTGCTGACTGCGGGGGGATGGGGATCTGGGTGGGGGTTCGCTACGATTCTCTGCTTGATGTGGAGACGGGCGGTTGAGATCGGAACTTGTTGGTGATAGATCTGCCTGTATGCTTCGTGTTGCATTGAATGGTGCTTAGATCTGTGGGATTGGTGATGGGATAGTCGGATTTGTCCATGTATTTGATACTTTCCCGGGTTGATTGCCATGGATTTGCGGGATATGGCATTA
CCTTTCTCTGTGCTGACTGCGGGGGGATGGGGATCTGGGTGGGGGTTCGCTACGATTCTCTGCTTGATGTGG---CGGGCGGTTGAGATCGGAACTTGTTGGTGATAGATCTGCCTGTATGCTTCGTGTTGCATTGAATGGTGCTTAGATCTGTGGGATTGGTGATGGGATAGTCGGATTTGTCCATGTACTTGATACTTTCCCGGGTTGATTGCCATGGATTTGCGGGATATGGCATTA	9	30	Deletion	0.01	-3	PFSVLTAGGWGSGWGFATILCLMWRAVEIGTCW*	PFSVLTAGGWGSGWGFATILCLMWRRAVEIGTCW*	CCTTTCTCTGTGCTGACTGCGGGGGGATGGGGATCTGGGTGGGGGTTCGCTACGATTCTCTGCTTGATGTGG---CGGGCGGTTGAGATCGGAACTTGTTGGTGATAGATCTGCCTGTATGCTTCGTGTTGCATTGAATGGTGCTTAGATCTGTGGGATTGGTGATGGGATAGTCGGATTTGTCCATGTACTTGATACTTTCCCGGGTTGATTGCCATGGATTTGCGGGATATGGCATTA	CCTTTCTCTGTGCTGACTGCGGGGGGATGGGGATCTGGGTGGGGGTTCGCTACGATTCTCTGCTTGATGTGGAGACGGGCGGTTGAGATCGGAACTTGTTGGTGATAGATCTGCCTGTATGCTTCGTGTTGCATTGAATGGTGCTTAGATCTGTGGGATTGGTGATGGGATAGTCGGATTTGTCCATGTATTTGATACTTTCCCGGGTTGATTGCCATGGATTTGCGGGATATGGCATTA
CCTTTCTCTGTGCTGACTGCGGGGGGATGGGGATCTGGGTGGGGGTTCGCTACGATTCTCTGCTTGATGTGG---CGGGCGGTTGAGATCGGAACTTGTTGGTGATAGATCTGCCTGTATGCTTCGTGTTGCATTGAATGGTGCTTAGATCTGTGGGATTGGTGATGGGATAGTCGGATTTGTCCATGTATTTGATACTTTCCCGGGCTGATTGCCATGGATTTGCGGGATATGGCATTA	9	29	Deletion	0.01	-3	PFSVLTAGGWGSGWGFATILCLMWRAVEIGTCW*	PFSVLTAGGWGSGWGFATILCLMWRRAVEIGTCW*	CCTTTCTCTGTGCTGACTGCGGGGGGATGGGGATCTGGGTGGGGGTTCGCTACGATTCTCTGCTTGATGTGG---CGGGCGGTTGAGATCGGAACTTGTTGGTGATAGATCTGCCTGTATGCTTCGTGTTGCATTGAATGGTGCTTAGATCTGTGGGATTGGTGATGGGATAGTCGGATTTGTCCATGTATTTGATACTTTCCCGGGCTGATTGCCATGGATTTGCGGGATATGGCATTA	CCTTTCTCTGTGCTGACTGCGGGGGGATGGGGATCTGGGTGGGGGTTCGCTACGATTCTCTGCTTGATGTGGAGACGGGCGGTTGAGATCGGAACTTGTTGGTGATAGATCTGCCTGTATGCTTCGTGTTGCATTGAATGGTGCTTAGATCTGTGGGATTGGTGATGGGATAGTCGGATTTGTCCATGTATTTGATACTTTCCCGGGTTGATTGCCATGGATTTGCGGGATATGGCATTA
CCTTTCTCTGTGCTGACTGCGGGGGGATGGGGATCTGGGTGGGGGTTCGCTACGATTCTCTGCTTGATGTGG---CGGGCGGTTGAGATCGGAACTTGTTGGTGATAGATCTGCCTGTATGCTTCGTGTTGCATTGAATGGTGCTTAGATCTGTGGGATTGGTGATGGGATAGTCGGATTTGTCCATGTATTTGATTCTTTCCCGGGTTGATTGCCATGGATTTGCGGGATATGGCATTA	9	31	Deletion	0.01	-3	PFSVLTAGGWGSGWGFATILCLMWRAVEIGTCW*	PFSVLTAGGWGSGWGFATILCLMWRRAVEIGTCW*	CCTTTCTCTGTGCTGACTGCGGGGGGATGGGGATCTGGGTGGGGGTTCGCTACGATTCTCTGCTTGATGTGG---CGGGCGGTTGAGATCGGAACTTGTTGGTGATAGATCTGCCTGTATGCTTCGTGTTGCATTGAATGGTGCTTAGATCTGTGGGATTGGTGATGGGATAGTCGGATTTGTCCATGTATTTGATTCTTTCCCGGGTTGATTGCCATGGATTTGCGGGATATGGCATTA	CCTTTCTCTGTGCTGACTGCGGGGGGATGGGGATCTGGGTGGGGGTTCGCTACGATTCTCTGCTTGATGTGGAGACGGGCGGTTGAGATCGGAACTTGTTGGTGATAGATCTGCCTGTATGCTTCGTGTTGCATTGAATGGTGCTTAGATCTGTGGGATTGGTGATGGGATAGTCGGATTTGTCCATGTATTTGATACTTTCCCGGGTTGATTGCCATGGATTTGCGGGATATGGCATTA
CCTTTCTCTGTGCTGACTGCGGGGGGATGGGGATCTGGGTGGGGGTTCGCTACGATTCTCTGCTTGATGTGG---CGGGCGGTTGAGATCGGAACTTGTTGGTGATAGATCTGCCTGTATGCTTCGTGTTGCATTGAATGGTGCTTAGGTCTGTGGGATTGGTGATGGGATAGTCGGATTTGTCCATGTATTTGATACTTTCCCGGGTTGATTGCCATGGATTTGCGGGATATGGCATTA	9	30	Deletion	0.01	-3	PFSVLTAGGWGSGWGFATILCLMWRAVEIGTCW*	PFSVLTAGGWGSGWGFATILCLMWRRAVEIGTCW*	CCTTTCTCTGTGCTGACTGCGGGGGGATGGGGATCTGGGTGGGGGTTCGCTACGATTCTCTGCTTGATGTGG---CGGGCGGTTGAGATCGGAACTTGTTGGTGATAGATCTGCCTGTATGCTTCGTGTTGCATTGAATGGTGCTTAGGTCTGTGGGATTGGTGATGGGATAGTCGGATTTGTCCATGTATTTGATACTTTCCCGGGTTGATTGCCATGGATTTGCGGGATATGGCATTA	CCTTTCTCTGTGCTGACTGCGGGGGGATGGGGATCTGGGTGGGGGTTCGCTACGATTCTCTGCTTGATGTGGAGACGGGCGGTTGAGATCGGAACTTGTTGGTGATAGATCTGCCTGTATGCTTCGTGTTGCATTGAATGGTGCTTAGATCTGTGGGATTGGTGATGGGATAGTCGGATTTGTCCATGTATTTGATACTTTCCCGGGTTGATTGCCATGGATTTGCGGGATATGGCATTA
CCTTTCTCTGTGCTGACTGCGGGGGGATGGGGATCTGGGTGGGGGTTCGCTACGATTCTCTGCTTGATGTGG---CGGGCGGTTGAGATCGGAACTTGTTGGTGATAGATCTGCCTGTATGCTTCGTGTTGCATTGAATGGTGCTTGGATCTGTGGGATTGGTGATGGGATAGTCGGATTTGTCCATGTATTTGATACTTTCCCGGGTTGATTGCCATGGATTTGCGGGATATGGCATTA	9	29	Deletion	0.01	-3	PFSVLTAGGWGSGWGFATILCLMWRAVEIGTCW*	PFSVLTAGGWGSGWGFATILCLMWRRAVEIGTCW*	CCTTTCTCTGTGCTGACTGCGGGGGGATGGGGATCTGGGTGGGGGTTCGCTACGATTCTCTGCTTGATGTGG---CGGGCGGTTGAGATCGGAACTTGTTGGTGATAGATCTGCCTGTATGCTTCGTGTTGCATTGAATGGTGCTTGGATCTGTGGGATTGGTGATGGGATAGTCGGATTTGTCCATGTATTTGATACTTTCCCGGGTTGATTGCCATGGATTTGCGGGATATGGCATTA	CCTTTCTCTGTGCTGACTGCGGGGGGATGGGGATCTGGGTGGGGGTTCGCTACGATTCTCTGCTTGATGTGGAGACGGGCGGTTGAGATCGGAACTTGTTGGTGATAGATCTGCCTGTATGCTTCGTGTTGCATTGAATGGTGCTTAGATCTGTGGGATTGGTGATGGGATAGTCGGATTTGTCCATGTATTTGATACTTTCCCGGGTTGATTGCCATGGATTTGCGGGATATGGCATTA
CCTTTCTCTGTGCTGACTGCGGGGGGATGGGGATCTGGGTGGGGGTTCGCTACGATTCTCTGCTTGATGTGG---CGGGCGGTTGAGATCGGAACTTGTTGGTGGTAGATCTGCCTGTATGCTTCGTGTTGCATTGAATGGTGCTTAGATCTGTGGGATTGGTGATGGGATAGTCGGATTTGTCCATGTATTTGATACTTTCCCGGGTTGATTGCCATGGATTTGCGGGATATGGCATTA	9	30	Deletion	0.01	-3	PFSVLTAGGWGSGWGFATILCLMWRAVEIGTCWW*	PFSVLTAGGWGSGWGFATILCLMWRRAVEIGTCW*	CCTTTCTCTGTGCTGACTGCGGGGGGATGGGGATCTGGGTGGGGGTTCGCTACGATTCTCTGCTTGATGTGG---CGGGCGGTTGAGATCGGAACTTGTTGGTGGTAGATCTGCCTGTATGCTTCGTGTTGCATTGAATGGTGCTTAGATCTGTGGGATTGGTGATGGGATAGTCGGATTTGTCCATGTATTTGATACTTTCCCGGGTTGATTGCCATGGATTTGCGGGATATGGCATTA	CCTTTCTCTGTGCTGACTGCGGGGGGATGGGGATCTGGGTGGGGGTTCGCTACGATTCTCTGCTTGATGTGGAGACGGGCGGTTGAGATCGGAACTTGTTGGTGATAGATCTGCCTGTATGCTTCGTGTTGCATTGAATGGTGCTTAGATCTGTGGGATTGGTGATGGGATAGTCGGATTTGTCCATGTATTTGATACTTTCCCGGGTTGATTGCCATGGATTTGCGGGATATGGCATTA
CCTTTCTCTGTGCTGACTGCGGGGGGATGGGGATCTGGGTGGGGGTTCGCTACGATTCTCTGCTTGATGTGG---CGGGCGGTTGAGGTCGGAACTTGTTGGTGATAGATCTGCCTGTATGCTTCGTGTTGCATTGAATGGTGCTTAGATCTGTGGGATTGGTGATGGGATAGTCGGATTTGTCCATGTATTTGATACTTTCCCGGGTTGATTGCCATGGATTTGCGGGATATGGCATTA	9	29	Deletion	0.01	-3	PFSVLTAGGWGSGWGFATILCLMWRAVEVGTCW*	PFSVLTAGGWGSGWGFATILCLMWRRAVEIGTCW*	CCTTTCTCTGTGCTGACTGCGGGGGGATGGGGATCTGGGTGGGGGTTCGCTACGATTCTCTGCTTGATGTGG---CGGGCGGTTGAGGTCGGAACTTGTTGGTGATAGATCTGCCTGTATGCTTCGTGTTGCATTGAATGGTGCTTAGATCTGTGGGATTGGTGATGGGATAGTCGGATTTGTCCATGTATTTGATACTTTCCCGGGTTGATTGCCATGGATTTGCGGGATATGGCATTA	CCTTTCTCTGTGCTGACTGCGGGGGGATGGGGATCTGGGTGGGGGTTCGCTACGATTCTCTGCTTGATGTGGAGACGGGCGGTTGAGATCGGAACTTGTTGGTGATAGATCTGCCTGTATGCTTCGTGTTGCATTGAATGGTGCTTAGATCTGTGGGATTGGTGATGGGATAGTCGGATTTGTCCATGTATTTGATACTTTCCCGGGTTGATTGCCATGGATTTGCGGGATATGGCATTA
CCTTTCTCTGTGCTGACTGCGGGGGGATGGGGATCTGGGTGGGGGTTCGCTACGATTCTCTGCTTGATGTGG---CGGGCGGTTGGGATCGGAACTTGTTGGTGATAGATCTGCCTGTATGCTTCGTGTTGCATTGAATGGTGCTTAGATCTGTGGGATTGGTGATGGGATAGTCGGATTTGTCCATGTATTTGATACTTTCCCGGGTTGATTGCCATGGATTTGCGGGATATGGCATTA	9	30	Deletion	0.01	-3	PFSVLTAGGWGSGWGFATILCLMWRAVGIGTCW*	PFSVLTAGGWGSGWGFATILCLMWRRAVEIGTCW*	CCTTTCTCTGTGCTGACTGCGGGGGGATGGGGATCTGGGTGGGGGTTCGCTACGATTCTCTGCTTGATGTGG---CGGGCGGTTGGGATCGGAACTTGTTGGTGATAGATCTGCCTGTATGCTTCGTGTTGCATTGAATGGTGCTTAGATCTGTGGGATTGGTGATGGGATAGTCGGATTTGTCCATGTATTTGATACTTTCCCGGGTTGATTGCCATGGATTTGCGGGATATGGCATTA	CCTTTCTCTGTGCTGACTGCGGGGGGATGGGGATCTGGGTGGGGGTTCGCTACGATTCTCTGCTTGATGTGGAGACGGGCGGTTGAGATCGGAACTTGTTGGTGATAGATCTGCCTGTATGCTTCGTGTTGCATTGAATGGTGCTTAGATCTGTGGGATTGGTGATGGGATAGTCGGATTTGTCCATGTATTTGATACTTTCCCGGGTTGATTGCCATGGATTTGCGGGATATGGCATTA
CCTTTCTCTGTGCTGACTGCGGGGGGATGGGGATCTGGGTGGGGGTTCGCTACGATTCTCTGCTTGATGTGG---GGGGCGGTTGAGATCGGAACTTGTTGGTGATAGATCTGCCTGTATGCTTCGTGTTGCATTGAATGGTGCTTAGATCTGTGGGATTGGTGATGGGATAGTCGGATTTGTCCATGTATTTGATACTTTCCCGGGTTGATTGCCATGGATTTGCGGGATATGGCATTA	9	33	Deletion	0.01	-3	PFSVLTAGGWGSGWGFATILCLMWGAVEIGTCW*	PFSVLTAGGWGSGWGFATILCLMWRRAVEIGTCW*	CCTTTCTCTGTGCTGACTGCGGGGGGATGGGGATCTGGGTGGGGGTTCGCTACGATTCTCTGCTTGATGTGG---GGGGCGGTTGAGATCGGAACTTGTTGGTGATAGATCTGCCTGTATGCTTCGTGTTGCATTGAATGGTGCTTAGATCTGTGGGATTGGTGATGGGATAGTCGGATTTGTCCATGTATTTGATACTTTCCCGGGTTGATTGCCATGGATTTGCGGGATATGGCATTA	CCTTTCTCTGTGCTGACTGCGGGGGGATGGGGATCTGGGTGGGGGTTCGCTACGATTCTCTGCTTGATGTGGAGACGGGCGGTTGAGATCGGAACTTGTTGGTGATAGATCTGCCTGTATGCTTCGTGTTGCATTGAATGGTGCTTAGATCTGTGGGATTGGTGATGGGATAGTCGGATTTGTCCATGTATTTGATACTTTCCCGGGTTGATTGCCATGGATTTGCGGGATATGGCATTA
CCTTTCTCTGTGCTGACTGCGGGGGGATGGGGATCTGGGTGGGGGTTCGCTACGATTCTCTGCTTGATGTGGAGAC--GCGGTTGAGATCGGAACTTGTTGGTGATAGATCTGCCTGTATGCTTCGTGTTGCATTGAATGGTGCTTAGATCTGTGGGATTGGTGATGGGATAGTCGGATTTGTCCATGTATTTGATACTTTCCCGGGTTGATTGCCATGGATTTGCGGGATATGGCATTA	9	34	Deletion	0.01	-2	PFSVLTAGGWGSGWGFATILCLMWRRG*	PFSVLTAGGWGSGWGFATILCLMWRRAVEIGTCW*	CCTTTCTCTGTGCTGACTGCGGGGGGATGGGGATCTGGGTGGGGGTTCGCTACGATTCTCTGCTTGATGTGGAGAC--GCGGTTGAGATCGGAACTTGTTGGTGATAGATCTGCCTGTATGCTTCGTGTTGCATTGAATGGTGCTTAGATCTGTGGGATTGGTGATGGGATAGTCGGATTTGTCCATGTATTTGATACTTTCCCGGGTTGATTGCCATGGATTTGCGGGATATGGCATTA	CCTTTCTCTGTGCTGACTGCGGGGGGATGGGGATCTGGGTGGGGGTTCGCTACGATTCTCTGCTTGATGTGGAGACGGGCGGTTGAGATCGGAACTTGTTGGTGATAGATCTGCCTGTATGCTTCGTGTTGCATTGAATGGTGCTTAGATCTGTGGGATTGGTGATGGGATAGTCGGATTTGTCCATGTATTTGATACTTTCCCGGGTTGATTGCCATGGATTTGCGGGATATGGCATTA
CCTTTCTCTGTGCTGACTGCGGGGGGATGGGGATCTGGGTGGGGGTTCGCTACGATTCTCTGCTTGATGTGGAGACcAGGCGGTTGAGATCGGAACTTGTTGGTGATAGATCTGCCTGTATGCTTCGTGTTGCATTGAATGGTGCTTAGATCTGTGGGATTGGTGATGGGATAGTCGGATTTGTCCATGTATTTGATACTTTCCCGGGTTGATTGCCATGGATTTGCGGGATATGGCATTA	9	33	Insertion	0.01	1	PFSVLTAGGWGSGWGFATILCLMWRPGG*	PFSVLTAGGWGSGWGFATILCLMWRRAVEIGTCW*	CCTTTCTCTGTGCTGACTGCGGGGGGATGGGGATCTGGGTGGGGGTTCGCTACGATTCTCTGCTTGATGTGGAGACCAGGCGGTTGAGATCGGAACTTGTTGGTGATAGATCTGCCTGTATGCTTCGTGTTGCATTGAATGGTGCTTAGATCTGTGGGATTGGTGATGGGATAGTCGGATTTGTCCATGTATTTGATACTTTCCCGGGTTGATTGCCATGGATTTGCGGGATATGGCATTA	CCTTTCTCTGTGCTGACTGCGGGGGGATGGGGATCTGGGTGGGGGTTCGCTACGATTCTCTGCTTGATGTGGAGACGGGCGGTTGAGATCGGAACTTGTTGGTGATAGATCTGCCTGTATGCTTCGTGTTGCATTGAATGGTGCTTAGATCTGTGGGATTGGTGATGGGATAGTCGGATTTGTCCATGTATTTGATACTTTCCCGGGTTGATTGCCATGGATTTGCGGGATATGGCATTA
CCTTTCTCTGTGCTGACTGCGGGGGGATGGGGATCTGGGTGGGGGTTCGCTACGATTCTCTGCTTGATGTGGAGACcGGGCGGTTGAGATCGGAACTTGTTGGTGATAGATCTGCCTGTATGCTTCGTGTTGCATTGAATGGTGCTTAGATCTGTGGGATTGGTGATGGGATAGTCGGACTTGTCCATGTATTTGATACTTTCCCGGGTTGATTGCCATGGATTTGCGGGATATGGCATTA	9	33	Insertion	0.01	1	PFSVLTAGGWGSGWGFATILCLMWRPGG*	PFSVLTAGGWGSGWGFATILCLMWRRAVEIGTCW*	CCTTTCTCTGTGCTGACTGCGGGGGGATGGGGATCTGGGTGGGGGTTCGCTACGATTCTCTGCTTGATGTGGAGACCGGGCGGTTGAGATCGGAACTTGTTGGTGATAGATCTGCCTGTATGCTTCGTGTTGCATTGAATGGTGCTTAGATCTGTGGGATTGGTGATGGGATAGTCGGACTTGTCCATGTATTTGATACTTTCCCGGGTTGATTGCCATGGATTTGCGGGATATGGCATTA	CCTTTCTCTGTGCTGACTGCGGGGGGATGGGGATCTGGGTGGGGGTTCGCTACGATTCTCTGCTTGATGTGGAGACGGGCGGTTGAGATCGGAACTTGTTGGTGATAGATCTGCCTGTATGCTTCGTGTTGCATTGAATGGTGCTTAGATCTGTGGGATTGGTGATGGGATAGTCGGATTTGTCCATGTATTTGATACTTTCCCGGGTTGATTGCCATGGATTTGCGGGATATGGCATTA
CCTTTCTCTGTGCTGACTGCGGGGGGATGGGGATCTGGGTGGGGGTTCGCTACGATTCTCTGCTTGATGTGGAGACcGGGCGGTTGAGATCGGAACTTGTTGGTGATAGATCTGCCTGTATGCTTCGTGTTGCATTGAATGGTGCTTAGATCTGTGGGATTGGTGATGGGATAGTCGGATTTGTCCATGTATTTGGTACTTTCCCGGGTTGATTGCCATGGATTTGCGGGATATGGCATTA	9	33	Insertion	0.01	1	PFSVLTAGGWGSGWGFATILCLMWRPGG*	PFSVLTAGGWGSGWGFATILCLMWRRAVEIGTCW*	CCTTTCTCTGTGCTGACTGCGGGGGGATGGGGATCTGGGTGGGGGTTCGCTACGATTCTCTGCTTGATGTGGAGACCGGGCGGTTGAGATCGGAACTTGTTGGTGATAGATCTGCCTGTATGCTTCGTGTTGCATTGAATGGTGCTTAGATCTGTGGGATTGGTGATGGGATAGTCGGATTTGTCCATGTATTTGGTACTTTCCCGGGTTGATTGCCATGGATTTGCGGGATATGGCATTA	CCTTTCTCTGTGCTGACTGCGGGGGGATGGGGATCTGGGTGGGGGTTCGCTACGATTCTCTGCTTGATGTGGAGACGGGCGGTTGAGATCGGAACTTGTTGGTGATAGATCTGCCTGTATGCTTCGTGTTGCATTGAATGGTGCTTAGATCTGTGGGATTGGTGATGGGATAGTCGGATTTGTCCATGTATTTGATACTTTCCCGGGTTGATTGCCATGGATTTGCGGGATATGGCATTA
CCTTTCTCTGTGCTGACTGCGGGGGGATGGGGATCTGGGTGGGGGTTCGCTACGATTCTCTGCTTGATGTGGAGACcGGGCGGTTGAGATCGGAACTTGTTGGTGATAGATCTGCCTGTATGCTTCGTGTTGCATTGAATGGTGCTTAGATCTGTGGGATTGGTGATGGGATAGTCGGATTTGTCCATGTGTTTGATACTTTCCCGGGTTGATTGCCATGGATTTGCGGGATATGGCATTA	9	33	Insertion	0.01	1	PFSVLTAGGWGSGWGFATILCLMWRPGG*	PFSVLTAGGWGSGWGFATILCLMWRRAVEIGTCW*	CCTTTCTCTGTGCTGACTGCGGGGGGATGGGGATCTGGGTGGGGGTTCGCTACGATTCTCTGCTTGATGTGGAGACCGGGCGGTTGAGATCGGAACTTGTTGGTGATAGATCTGCCTGTATGCTTCGTGTTGCATTGAATGGTGCTTAGATCTGTGGGATTGGTGATGGGATAGTCGGATTTGTCCATGTGTTTGATACTTTCCCGGGTTGATTGCCATGGATTTGCGGGATATGGCATTA	CCTTTCTCTGTGCTGACTGCGGGGGGATGGGGATCTGGGTGGGGGTTCGCTACGATTCTCTGCTTGATGTGGAGACGGGCGGTTGAGATCGGAACTTGTTGGTGATAGATCTGCCTGTATGCTTCGTGTTGCATTGAATGGTGCTTAGATCTGTGGGATTGGTGATGGGATAGTCGGATTTGTCCATGTATTTGATACTTTCCCGGGTTGATTGCCATGGATTTGCGGGATATGGCATTA
CCTTTCTCTGTGCTGACTGCGGGGGGATGGGGATCTGGGTGGGGGTTCGCTACGATTCTCTGCTTGATGTGGAGACcGGGCGGTTGAGATCGGAACTTGTTGGTGATAGATCTGCCTGTATGCTTCGTGTTGCATTGAATGGTGCTTAGATCTGTGGGATTGGTGATGGGATAGTCGGATTTGTCTATGTATTTGATACTTTCCCGGGTTGATTGCCATGGATTTGCGGGATATGGCATTA	9	33	Insertion	0.01	1	PFSVLTAGGWGSGWGFATILCLMWRPGG*	PFSVLTAGGWGSGWGFATILCLMWRRAVEIGTCW*	CCTTTCTCTGTGCTGACTGCGGGGGGATGGGGATCTGGGTGGGGGTTCGCTACGATTCTCTGCTTGATGTGGAGACCGGGCGGTTGAGATCGGAACTTGTTGGTGATAGATCTGCCTGTATGCTTCGTGTTGCATTGAATGGTGCTTAGATCTGTGGGATTGGTGATGGGATAGTCGGATTTGTCTATGTATTTGATACTTTCCCGGGTTGATTGCCATGGATTTGCGGGATATGGCATTA	CCTTTCTCTGTGCTGACTGCGGGGGGATGGGGATCTGGGTGGGGGTTCGCTACGATTCTCTGCTTGATGTGGAGACGGGCGGTTGAGATCGGAACTTGTTGGTGATAGATCTGCCTGTATGCTTCGTGTTGCATTGAATGGTGCTTAGATCTGTGGGATTGGTGATGGGATAGTCGGATTTGTCCATGTATTTGATACTTTCCCGGGTTGATTGCCATGGATTTGCGGGATATGGCATTA
CCTTTCTCTGTGCTGACTGCGGGGGGATGGGGATCTGGGTGGGGGTTCGCTACGATTCTCTGCTTGATGTGGAGACcGGGCGGTTGAGATCGGAACTTGTTGGTGATAGATCTGCCTGTATGCTTCGTGTTGCATTGAATGGTGCTTAGGTCTGTGGGATTGGTGATGGGATAGTCGGATTTGTCCATGTATTTGATACTTTCCCGGGTTGATTGCCATGGATTTGCGGGATATGGCATTA	9	33	Insertion	0.01	1	PFSVLTAGGWGSGWGFATILCLMWRPGG*	PFSVLTAGGWGSGWGFATILCLMWRRAVEIGTCW*	CCTTTCTCTGTGCTGACTGCGGGGGGATGGGGATCTGGGTGGGGGTTCGCTACGATTCTCTGCTTGATGTGGAGACCGGGCGGTTGAGATCGGAACTTGTTGGTGATAGATCTGCCTGTATGCTTCGTGTTGCATTGAATGGTGCTTAGGTCTGTGGGATTGGTGATGGGATAGTCGGATTTGTCCATGTATTTGATACTTTCCCGGGTTGATTGCCATGGATTTGCGGGATATGGCATTA	CCTTTCTCTGTGCTGACTGCGGGGGGATGGGGATCTGGGTGGGGGTTCGCTACGATTCTCTGCTTGATGTGGAGACGGGCGGTTGAGATCGGAACTTGTTGGTGATAGATCTGCCTGTATGCTTCGTGTTGCATTGAATGGTGCTTAGATCTGTGGGATTGGTGATGGGATAGTCGGATTTGTCCATGTATTTGATACTTTCCCGGGTTGATTGCCATGGATTTGCGGGATATGGCATTA
CCTTTCTCTGTGCTGACTGCGGGGGGATGGGGATCTGGGTGGGGGTTCGCTACGATTCTCTGCTTGATGTGGAGACcGGGCGGTTGAGATCGGAACTTGTTGGTGATAGGTCTGCCTGTATGCTTCGTGTTGCATTGAATGGTGCTTAGATCTGTGGGATTGGTGATGGGATAGTCGGATTTGTCCATGTATTTGATACTTTCCCGGGTTGATTGCCATGGATTTGCGGGATATGGCATTA	9	34	Insertion	0.01	1	PFSVLTAGGWGSGWGFATILCLMWRPGG*	PFSVLTAGGWGSGWGFATILCLMWRRAVEIGTCW*	CCTTTCTCTGTGCTGACTGCGGGGGGATGGGGATCTGGGTGGGGGTTCGCTACGATTCTCTGCTTGATGTGGAGACCGGGCGGTTGAGATCGGAACTTGTTGGTGATAGGTCTGCCTGTATGCTTCGTGTTGCATTGAATGGTGCTTAGATCTGTGGGATTGGTGATGGGATAGTCGGATTTGTCCATGTATTTGATACTTTCCCGGGTTGATTGCCATGGATTTGCGGGATATGGCATTA	CCTTTCTCTGTGCTGACTGCGGGGGGATGGGGATCTGGGTGGGGGTTCGCTACGATTCTCTGCTTGATGTGGAGACGGGCGGTTGAGATCGGAACTTGTTGGTGATAGATCTGCCTGTATGCTTCGTGTTGCATTGAATGGTGCTTAGATCTGTGGGATTGGTGATGGGATAGTCGGATTTGTCCATGTATTTGATACTTTCCCGGGTTGATTGCCATGGATTTGCGGGATATGGCATTA
CCTTTCTCTGTGCTGACTGCGGGGGGATGGGGATCTGGGTGGGGGTTCGCTACGATTCTCTGCTTGATGTGGAGACGGGCGGTTGAGACCGGAACTTGTTGGTGATAGATCTGCCTGTATGCTTCGTGTTGCATTGAATGGTGCTTAGATCTGTGGGATTGGTGATGGGATAGTCGGATTTGTCCATGTATTTGATACTTTCCCGGGTTGATTGCCATGGATTTGCGGGATATGGCATTA	9	33	1 Base Change	0.01	0	PFSVLTAGGWGSGWGFATILCLMWRRAVETGTCW*	PFSVLTAGGWGSGWGFATILCLMWRRAVEIGTCW*	CCTTTCTCTGTGCTGACTGCGGGGGGATGGGGATCTGGGTGGGGGTTCGCTACGATTCTCTGCTTGATGTGGAGACGGGCGGTTGAGACCGGAACTTGTTGGTGATAGATCTGCCTGTATGCTTCGTGTTGCATTGAATGGTGCTTAGATCTGTGGGATTGGTGATGGGATAGTCGGATTTGTCCATGTATTTGATACTTTCCCGGGTTGATTGCCATGGATTTGCGGGATATGGCATTA	CCTTTCTCTGTGCTGACTGCGGGGGGATGGGGATCTGGGTGGGGGTTCGCTACGATTCTCTGCTTGATGTGGAGACGGGCGGTTGAGATCGGAACTTGTTGGTGATAGATCTGCCTGTATGCTTCGTGTTGCATTGAATGGTGCTTAGATCTGTGGGATTGGTGATGGGATAGTCGGATTTGTCCATGTATTTGATACTTTCCCGGGTTGATTGCCATGGATTTGCGGGATATGGCATTA
CCTTTCTCTGTGCTGACTGCGGGGGGATGGGGATCTGGGTGGGGGTTCGCTACGATTCTCTGCTTGATGTGGAGACGGGCGGTTGAGATCGGAACTTGTTGGTGATAGATCTGCCTGTATGCTTCGTGTTGCATTGAATGGTGCTTAGATCTGTGAGATTGGTGATGGGATAGTCGGATTTGTCCATGTATTTGATACTTTCCCGGGTTGATTGCCATGGATTTGCGGGATATGGCATTA	9	30	1 Base Change	0.01	0	PFSVLTAGGWGSGWGFATILCLMWRRAVEIGTCW*	PFSVLTAGGWGSGWGFATILCLMWRRAVEIGTCW*	CCTTTCTCTGTGCTGACTGCGGGGGGATGGGGATCTGGGTGGGGGTTCGCTACGATTCTCTGCTTGATGTGGAGACGGGCGGTTGAGATCGGAACTTGTTGGTGATAGATCTGCCTGTATGCTTCGTGTTGCATTGAATGGTGCTTAGATCTGTGAGATTGGTGATGGGATAGTCGGATTTGTCCATGTATTTGATACTTTCCCGGGTTGATTGCCATGGATTTGCGGGATATGGCATTA	CCTTTCTCTGTGCTGACTGCGGGGGGATGGGGATCTGGGTGGGGGTTCGCTACGATTCTCTGCTTGATGTGGAGACGGGCGGTTGAGATCGGAACTTGTTGGTGATAGATCTGCCTGTATGCTTCGTGTTGCATTGAATGGTGCTTAGATCTGTGGGATTGGTGATGGGATAGTCGGATTTGTCCATGTATTTGATACTTTCCCGGGTTGATTGCCATGGATTTGCGGGATATGGCATTA
CCTTTCTCTGTGCTGACTGCGGGGGGATGGGGATCTGGGTGGGGGTTCGCTACGATTCTCTGCTTGATGTGGAGACGGGCGGTTGAGATCGGAACTTGTTGGTGATAGATCTGCCTGTATGCTTCGTGTTGCATTGAATGGTGCTTAGATCTGTGGAATTGGTGATGGGATAGTCGGATTTGTCCATGTATTTGATACTTTCCCGGGTTGATTGCCATGGATTTGCGGGATATGGCATTA	9	33	1 Base Change	0.01	0	PFSVLTAGGWGSGWGFATILCLMWRRAVEIGTCW*	PFSVLTAGGWGSGWGFATILCLMWRRAVEIGTCW*	CCTTTCTCTGTGCTGACTGCGGGGGGATGGGGATCTGGGTGGGGGTTCGCTACGATTCTCTGCTTGATGTGGAGACGGGCGGTTGAGATCGGAACTTGTTGGTGATAGATCTGCCTGTATGCTTCGTGTTGCATTGAATGGTGCTTAGATCTGTGGAATTGGTGATGGGATAGTCGGATTTGTCCATGTATTTGATACTTTCCCGGGTTGATTGCCATGGATTTGCGGGATATGGCATTA	CCTTTCTCTGTGCTGACTGCGGGGGGATGGGGATCTGGGTGGGGGTTCGCTACGATTCTCTGCTTGATGTGGAGACGGGCGGTTGAGATCGGAACTTGTTGGTGATAGATCTGCCTGTATGCTTCGTGTTGCATTGAATGGTGCTTAGATCTGTGGGATTGGTGATGGGATAGTCGGATTTGTCCATGTATTTGATACTTTCCCGGGTTGATTGCCATGGATTTGCGGGATATGGCATTA
CCTTTCTCTGTGCTGACTGCGGGGGGATGGGGATCTGGGTGGGGGTTCGCTACGATTCTCTGCTTGATGTGGAGACGGGCGGTTGAGATCGGAACTTGTTGGTGATAGATCTGCCTGTATGCTTCGTGTTGCATTGAATGGTGCTTAGATCTGTGGGATTGGTGATGGGACAGTCGGATTTGTCCATGTATTTGATACTTTCCCGGGTTGATTGCCATGGATTTGCGGGATATGGCATTA	9	33	1 Base Change	0.01	0	PFSVLTAGGWGSGWGFATILCLMWRRAVEIGTCW*	PFSVLTAGGWGSGWGFATILCLMWRRAVEIGTCW*	CCTTTCTCTGTGCTGACTGCGGGGGGATGGGGATCTGGGTGGGGGTTCGCTACGATTCTCTGCTTGATGTGGAGACGGGCGGTTGAGATCGGAACTTGTTGGTGATAGATCTGCCTGTATGCTTCGTGTTGCATTGAATGGTGCTTAGATCTGTGGGATTGGTGATGGGACAGTCGGATTTGTCCATGTATTTGATACTTTCCCGGGTTGATTGCCATGGATTTGCGGGATATGGCATTA	CCTTTCTCTGTGCTGACTGCGGGGGGATGGGGATCTGGGTGGGGGTTCGCTACGATTCTCTGCTTGATGTGGAGACGGGCGGTTGAGATCGGAACTTGTTGGTGATAGATCTGCCTGTATGCTTCGTGTTGCATTGAATGGTGCTTAGATCTGTGGGATTGGTGATGGGATAGTCGGATTTGTCCATGTATTTGATACTTTCCCGGGTTGATTGCCATGGATTTGCGGGATATGGCATTA
CCTTTCTCTGTGCTGACTGCGGGGGGATGGGGATCTGGGTGGGGGTTCGCTACGATTCTCTGCTTGATGTGGAGACGGGCGGTTGAGATCGGAACTTGTTGGTGATAGATCTGCCTGTATGCTTCGTGTTGCATTGAATGGTGCTTAGATCTGTGGGATTGGTGATGGGATAGTCGGATTTGTCCATGCATTTGATACTTTCCCGGGTTGATTGCCATGGATTTGCGGGATATGGCATTA	9	33	1 Base Change	0.01	0	PFSVLTAGGWGSGWGFATILCLMWRRAVEIGTCW*	PFSVLTAGGWGSGWGFATILCLMWRRAVEIGTCW*	CCTTTCTCTGTGCTGACTGCGGGGGGATGGGGATCTGGGTGGGGGTTCGCTACGATTCTCTGCTTGATGTGGAGACGGGCGGTTGAGATCGGAACTTGTTGGTGATAGATCTGCCTGTATGCTTCGTGTTGCATTGAATGGTGCTTAGATCTGTGGGATTGGTGATGGGATAGTCGGATTTGTCCATGCATTTGATACTTTCCCGGGTTGATTGCCATGGATTTGCGGGATATGGCATTA	CCTTTCTCTGTGCTGACTGCGGGGGGATGGGGATCTGGGTGGGGGTTCGCTACGATTCTCTGCTTGATGTGGAGACGGGCGGTTGAGATCGGAACTTGTTGGTGATAGATCTGCCTGTATGCTTCGTGTTGCATTGAATGGTGCTTAGATCTGTGGGATTGGTGATGGGATAGTCGGATTTGTCCATGTATTTGATACTTTCCCGGGTTGATTGCCATGGATTTGCGGGATATGGCATTA
CCTTTCTCTGTGCTGACTGCGGGGGGATGGGGATCTGGGTGGGGGTTCGCTACGATTCTCTGCTTGATGTGGAGACGGGCGGTTGAGATCGGAACTTGTTGGTGATAGATCTGCCTGTATGCTTCGTGTTGCATTGAATGGTGCTTAGATCTGTGGGATTGGTGATGGGATAGTCGGATTTGTCCATGTATTTGATACTTTCCCGGGTTAATTGCCATGGATTTGCGGGATATGGCATTA	9	34	1 Base Change	0.01	0	PFSVLTAGGWGSGWGFATILCLMWRRAVEIGTCW*	PFSVLTAGGWGSGWGFATILCLMWRRAVEIGTCW*	CCTTTCTCTGTGCTGACTGCGGGGGGATGGGGATCTGGGTGGGGGTTCGCTACGATTCTCTGCTTGATGTGGAGACGGGCGGTTGAGATCGGAACTTGTTGGTGATAGATCTGCCTGTATGCTTCGTGTTGCATTGAATGGTGCTTAGATCTGTGGGATTGGTGATGGGATAGTCGGATTTGTCCATGTATTTGATACTTTCCCGGGTTAATTGCCATGGATTTGCGGGATATGGCATTA	CCTTTCTCTGTGCTGACTGCGGGGGGATGGGGATCTGGGTGGGGGTTCGCTACGATTCTCTGCTTGATGTGGAGACGGGCGGTTGAGATCGGAACTTGTTGGTGATAGATCTGCCTGTATGCTTCGTGTTGCATTGAATGGTGCTTAGATCTGTGGGATTGGTGATGGGATAGTCGGATTTGTCCATGTATTTGATACTTTCCCGGGTTGATTGCCATGGATTTGCGGGATATGGCATTA
CCTTTCTCTGTGCTGACTGCGGGGGGATGGGGATCTGGGTGGGGGTTCGCTACGATTCTCTGCTTGATGTGGAGACGGGCGGTTGAGATCGGAACTTGTTGGTGATAGATCTGCCTGTATGCTTCGTGTTGCATTGAATGGTGCTTAGATCTGTGGGATTGGTGATGGGATAGTCGGATTTGTCCATGTATTTGATACTTTCCCGGGTTGATTGCCATGGATTTGCGGGA-ATGGCATTA	9	34	Deletion	0.01	-1	PFSVLTAGGWGSGWGFATILCLMWRRAVEIGTCW*	PFSVLTAGGWGSGWGFATILCLMWRRAVEIGTCW*	CCTTTCTCTGTGCTGACTGCGGGGGGATGGGGATCTGGGTGGGGGTTCGCTACGATTCTCTGCTTGATGTGGAGACGGGCGGTTGAGATCGGAACTTGTTGGTGATAGATCTGCCTGTATGCTTCGTGTTGCATTGAATGGTGCTTAGATCTGTGGGATTGGTGATGGGATAGTCGGATTTGTCCATGTATTTGATACTTTCCCGGGTTGATTGCCATGGATTTGCGGGA-ATGGCATTA	CCTTTCTCTGTGCTGACTGCGGGGGGATGGGGATCTGGGTGGGGGTTCGCTACGATTCTCTGCTTGATGTGGAGACGGGCGGTTGAGATCGGAACTTGTTGGTGATAGATCTGCCTGTATGCTTCGTGTTGCATTGAATGGTGCTTAGATCTGTGGGATTGGTGATGGGATAGTCGGATTTGTCCATGTATTTGATACTTTCCCGGGTTGATTGCCATGGATTTGCGGGATATGGCATTA
CCTTTCTCTGTGCTGACTGCGGGGGGATGGGGATCTGGGTGGGGGTTCGCTACGATTCTCTGCTTGATGTGGAGACGGGCGGTTGAGATCGGAACTTGTTGGTGATAGATCTGCCTGTATGCTTCGTGTTGCATTGAATGGTGCTTAGATCTGTGGGATTGGTGATGGGATAGTCGGATTTGTCCATGTATTTGATACTTTCCCGGGTTGATTGCCATGGATTTGCGGGATATGGTATTA	9	33	1 Base Change	0.01	0	PFSVLTAGGWGSGWGFATILCLMWRRAVEIGTCW*	PFSVLTAGGWGSGWGFATILCLMWRRAVEIGTCW*	CCTTTCTCTGTGCTGACTGCGGGGGGATGGGGATCTGGGTGGGGGTTCGCTACGATTCTCTGCTTGATGTGGAGACGGGCGGTTGAGATCGGAACTTGTTGGTGATAGATCTGCCTGTATGCTTCGTGTTGCATTGAATGGTGCTTAGATCTGTGGGATTGGTGATGGGATAGTCGGATTTGTCCATGTATTTGATACTTTCCCGGGTTGATTGCCATGGATTTGCGGGATATGGTATTA	CCTTTCTCTGTGCTGACTGCGGGGGGATGGGGATCTGGGTGGGGGTTCGCTACGATTCTCTGCTTGATGTGGAGACGGGCGGTTGAGATCGGAACTTGTTGGTGATAGATCTGCCTGTATGCTTCGTGTTGCATTGAATGGTGCTTAGATCTGTGGGATTGGTGATGGGATAGTCGGATTTGTCCATGTATTTGATACTTTCCCGGGTTGATTGCCATGGATTTGCGGGATATGGCATTA
CCTTTCTCTGTGCTGACTGCGGGGGGATGGGGATCTGGGTGGGGGTTCGCTACGATTCTCTGCTTGATGTGGAGACGGGCGGTTGAGATCGGAACTTGTTGGTGATAGATCTGCCTGTATGCTTCGTGTTGCATTGAATGGTGCTTAGATCTGTGGGATTGGTGATGGGATAGTCGGATTTGTCCATGTATTTGATACTTTCCCGGGTTGATTGCCATGGATTTGCGGGGTATGGCATTA	9	33	1 Base Change	0.01	0	PFSVLTAGGWGSGWGFATILCLMWRRAVEIGTCW*	PFSVLTAGGWGSGWGFATILCLMWRRAVEIGTCW*	CCTTTCTCTGTGCTGACTGCGGGGGGATGGGGATCTGGGTGGGGGTTCGCTACGATTCTCTGCTTGATGTGGAGACGGGCGGTTGAGATCGGAACTTGTTGGTGATAGATCTGCCTGTATGCTTCGTGTTGCATTGAATGGTGCTTAGATCTGTGGGATTGGTGATGGGATAGTCGGATTTGTCCATGTATTTGATACTTTCCCGGGTTGATTGCCATGGATTTGCGGGGTATGGCATTA	CCTTTCTCTGTGCTGACTGCGGGGGGATGGGGATCTGGGTGGGGGTTCGCTACGATTCTCTGCTTGATGTGGAGACGGGCGGTTGAGATCGGAACTTGTTGGTGATAGATCTGCCTGTATGCTTCGTGTTGCATTGAATGGTGCTTAGATCTGTGGGATTGGTGATGGGATAGTCGGATTTGTCCATGTATTTGATACTTTCCCGGGTTGATTGCCATGGATTTGCGGGATATGGCATTA
CCTTTCTCTGTGCTGACTGCGGGGGGATGGGGATCTGGGTGGGGGTTCGCTACGATTCTCTGCTTGATGTGGAGACGGGCGGTTGAGATCGGAACTTGTTGGTGATAGATCTGCCTGTATGCTTCGTGTTGCATTGAATGGTGCTTAGATCTGTGGGATTGGTGATGGGATAGTTGGATTTGTCCATGTATTTGATACTTTCCCGGGTTGATTGCCATGGATTTGCGGGATATGGCATTA	9	32	1 Base Change	0.01	0	PFSVLTAGGWGSGWGFATILCLMWRRAVEIGTCW*	PFSVLTAGGWGSGWGFATILCLMWRRAVEIGTCW*	CCTTTCTCTGTGCTGACTGCGGGGGGATGGGGATCTGGGTGGGGGTTCGCTACGATTCTCTGCTTGATGTGGAGACGGGCGGTTGAGATCGGAACTTGTTGGTGATAGATCTGCCTGTATGCTTCGTGTTGCATTGAATGGTGCTTAGATCTGTGGGATTGGTGATGGGATAGTTGGATTTGTCCATGTATTTGATACTTTCCCGGGTTGATTGCCATGGATTTGCGGGATATGGCATTA	CCTTTCTCTGTGCTGACTGCGGGGGGATGGGGATCTGGGTGGGGGTTCGCTACGATTCTCTGCTTGATGTGGAGACGGGCGGTTGAGATCGGAACTTGTTGGTGATAGATCTGCCTGTATGCTTCGTGTTGCATTGAATGGTGCTTAGATCTGTGGGATTGGTGATGGGATAGTCGGATTTGTCCATGTATTTGATACTTTCCCGGGTTGATTGCCATGGATTTGCGGGATATGGCATTA
CCTTTCTCTGTGCTGACTGCGGGGGGATGGGGATCTGGGTGGGGGTTCGCTACGATTCTCTGCTTGATGTGGAGACGGGCGGTTGAGATCGGAACTTGTTGGTGATAGATCTGCCTGTATGCTTCGTGTTGCATTGAATGGTGCTTAGATCTGTGGGATTGGTGATGGGATGGTCGGATTTGTCCATGTATTTGATACTTTCCCGGGTTGATTGCCATGGATTTGCGGGATATGGCATTA	9	33	1 Base Change	0.01	0	PFSVLTAGGWGSGWGFATILCLMWRRAVEIGTCW*	PFSVLTAGGWGSGWGFATILCLMWRRAVEIGTCW*	CCTTTCTCTGTGCTGACTGCGGGGGGATGGGGATCTGGGTGGGGGTTCGCTACGATTCTCTGCTTGATGTGGAGACGGGCGGTTGAGATCGGAACTTGTTGGTGATAGATCTGCCTGTATGCTTCGTGTTGCATTGAATGGTGCTTAGATCTGTGGGATTGGTGATGGGATGGTCGGATTTGTCCATGTATTTGATACTTTCCCGGGTTGATTGCCATGGATTTGCGGGATATGGCATTA	CCTTTCTCTGTGCTGACTGCGGGGGGATGGGGATCTGGGTGGGGGTTCGCTACGATTCTCTGCTTGATGTGGAGACGGGCGGTTGAGATCGGAACTTGTTGGTGATAGATCTGCCTGTATGCTTCGTGTTGCATTGAATGGTGCTTAGATCTGTGGGATTGGTGATGGGATAGTCGGATTTGTCCATGTATTTGATACTTTCCCGGGTTGATTGCCATGGATTTGCGGGATATGGCATTA
CCTTTCTCTGTGCTGACTGCGGGGGGATGGGGATCTGGGTGGGGGTTCGCTACGATTCTCTGCTTGATGTGGAGACGGGCGGTTGAGATCGGGACTTGTTGGTGATAGATCTGCCTGTATGCTTCGTGTTGCATTGAATGGTGCTTAGATCTGTGGGATTGGTGATGGGATAGTCGGATTTGTCCATGTATTTGATACTTTCCCGGGTTGATTGCCATGGATTTGCGGGATATGGCATTA	9	33	1 Base Change	0.01	0	PFSVLTAGGWGSGWGFATILCLMWRRAVEIGTCW*	PFSVLTAGGWGSGWGFATILCLMWRRAVEIGTCW*	CCTTTCTCTGTGCTGACTGCGGGGGGATGGGGATCTGGGTGGGGGTTCGCTACGATTCTCTGCTTGATGTGGAGACGGGCGGTTGAGATCGGGACTTGTTGGTGATAGATCTGCCTGTATGCTTCGTGTTGCATTGAATGGTGCTTAGATCTGTGGGATTGGTGATGGGATAGTCGGATTTGTCCATGTATTTGATACTTTCCCGGGTTGATTGCCATGGATTTGCGGGATATGGCATTA	CCTTTCTCTGTGCTGACTGCGGGGGGATGGGGATCTGGGTGGGGGTTCGCTACGATTCTCTGCTTGATGTGGAGACGGGCGGTTGAGATCGGAACTTGTTGGTGATAGATCTGCCTGTATGCTTCGTGTTGCATTGAATGGTGCTTAGATCTGTGGGATTGGTGATGGGATAGTCGGATTTGTCCATGTATTTGATACTTTCCCGGGTTGATTGCCATGGATTTGCGGGATATGGCATTA
CCTTTCTCTGTGCTGACTGCGGGGGGATGGGGATCTGGGTGGGGGTTCGCTACGATTCTCTGCTTGATGTGGAGACTgGGCGGTTGAGATCAGAACTTGTTGGTGATAGATCTGCCTGTATGCTTCGTGTTGCATTGAATGGTGCTTAGATCTGTGGGATTGGTGATGGGATAGTCGGATTTGTCCATGTATTTGATACTTTCCCGGGTTGATTGCCATGGATTTGCGGGATATGGCATTA	9	33	Insertion	0.01	1	PFSVLTAGGWGSGWGFATILCLMWRLGG*	PFSVLTAGGWGSGWGFATILCLMWRRAVEIGTCW*	CCTTTCTCTGTGCTGACTGCGGGGGGATGGGGATCTGGGTGGGGGTTCGCTACGATTCTCTGCTTGATGTGGAGACTGGGCGGTTGAGATCAGAACTTGTTGGTGATAGATCTGCCTGTATGCTTCGTGTTGCATTGAATGGTGCTTAGATCTGTGGGATTGGTGATGGGATAGTCGGATTTGTCCATGTATTTGATACTTTCCCGGGTTGATTGCCATGGATTTGCGGGATATGGCATTA	CCTTTCTCTGTGCTGACTGCGGGGGGATGGGGATCTGGGTGGGGGTTCGCTACGATTCTCTGCTTGATGTGGAGACGGGCGGTTGAGATCGGAACTTGTTGGTGATAGATCTGCCTGTATGCTTCGTGTTGCATTGAATGGTGCTTAGATCTGTGGGATTGGTGATGGGATAGTCGGATTTGTCCATGTATTTGATACTTTCCCGGGTTGATTGCCATGGATTTGCGGGATATGGCATTA
CCTTTCTCTGTGCTGACTGCGGGGGGATGGGGATCTGGGTGGGGGTTCGCTACGATTCTCTGCTTGATGTGGAGACTgGGCGGTTGAGATCGGAACTTGTTGGTGATAGATCTGCCTGTACGCTTCGTGTTGCATTGAATGGTGCTTAGATCTGTGGGATTGGTGATGGGATAGTCGGATTTGTCCATGTATTTGATACTTTCCCGGGTTGATTGCCATGGATTTGCGGGATATGGCATTA	9	33	Insertion	0.01	1	PFSVLTAGGWGSGWGFATILCLMWRLGG*	PFSVLTAGGWGSGWGFATILCLMWRRAVEIGTCW*	CCTTTCTCTGTGCTGACTGCGGGGGGATGGGGATCTGGGTGGGGGTTCGCTACGATTCTCTGCTTGATGTGGAGACTGGGCGGTTGAGATCGGAACTTGTTGGTGATAGATCTGCCTGTACGCTTCGTGTTGCATTGAATGGTGCTTAGATCTGTGGGATTGGTGATGGGATAGTCGGATTTGTCCATGTATTTGATACTTTCCCGGGTTGATTGCCATGGATTTGCGGGATATGGCATTA	CCTTTCTCTGTGCTGACTGCGGGGGGATGGGGATCTGGGTGGGGGTTCGCTACGATTCTCTGCTTGATGTGGAGACGGGCGGTTGAGATCGGAACTTGTTGGTGATAGATCTGCCTGTATGCTTCGTGTTGCATTGAATGGTGCTTAGATCTGTGGGATTGGTGATGGGATAGTCGGATTTGTCCATGTATTTGATACTTTCCCGGGTTGATTGCCATGGATTTGCGGGATATGGCATTA
CCTTTCTCTGTGCTGACTGCGGGGGGATGGGGATCTGGGTGGGGGTTCGCTACGATTCTCTGCTTGATGTGGAGACTgGGCGGTTGAGATCGGAACTTGTTGGTGATAGATCTGCCTGTATGCTTCGTGTTGCATCGAATGGTGCTTAGATCTGTGGGATTGGTGATGGGATAGTCGGATTTGTCCATGTATTTGATACTTTCCCGGGTTGATTGCCATGGATTTGCGGGATATGGCATTA	9	33	Insertion	0.01	1	PFSVLTAGGWGSGWGFATILCLMWRLGG*	PFSVLTAGGWGSGWGFATILCLMWRRAVEIGTCW*	CCTTTCTCTGTGCTGACTGCGGGGGGATGGGGATCTGGGTGGGGGTTCGCTACGATTCTCTGCTTGATGTGGAGACTGGGCGGTTGAGATCGGAACTTGTTGGTGATAGATCTGCCTGTATGCTTCGTGTTGCATCGAATGGTGCTTAGATCTGTGGGATTGGTGATGGGATAGTCGGATTTGTCCATGTATTTGATACTTTCCCGGGTTGATTGCCATGGATTTGCGGGATATGGCATTA	CCTTTCTCTGTGCTGACTGCGGGGGGATGGGGATCTGGGTGGGGGTTCGCTACGATTCTCTGCTTGATGTGGAGACGGGCGGTTGAGATCGGAACTTGTTGGTGATAGATCTGCCTGTATGCTTCGTGTTGCATTGAATGGTGCTTAGATCTGTGGGATTGGTGATGGGATAGTCGGATTTGTCCATGTATTTGATACTTTCCCGGGTTGATTGCCATGGATTTGCGGGATATGGCATTA
CCTTTCTCTGTGCTGACTGCGGGGGGATGGGGATCTGGGTGGGGGTTCGCTACGATTCTCTGCTTGATGTGGAGACTgGGCGGTTGAGATCGGAACTTGTTGGTGATAGATCTGCCTGTATGCTTCGTGTTGCATTGAATGGCGCTTAGATCTGTGGGATTGGTGATGGGATAGTCGGATTTGTCCATGTATTTGATACTTTCCCGGGTTGATTGCCATGGATTTGCGGGATATGGCATTA	9	34	Insertion	0.01	1	PFSVLTAGGWGSGWGFATILCLMWRLGG*	PFSVLTAGGWGSGWGFATILCLMWRRAVEIGTCW*	CCTTTCTCTGTGCTGACTGCGGGGGGATGGGGATCTGGGTGGGGGTTCGCTACGATTCTCTGCTTGATGTGGAGACTGGGCGGTTGAGATCGGAACTTGTTGGTGATAGATCTGCCTGTATGCTTCGTGTTGCATTGAATGGCGCTTAGATCTGTGGGATTGGTGATGGGATAGTCGGATTTGTCCATGTATTTGATACTTTCCCGGGTTGATTGCCATGGATTTGCGGGATATGGCATTA	CCTTTCTCTGTGCTGACTGCGGGGGGATGGGGATCTGGGTGGGGGTTCGCTACGATTCTCTGCTTGATGTGGAGACGGGCGGTTGAGATCGGAACTTGTTGGTGATAGATCTGCCTGTATGCTTCGTGTTGCATTGAATGGTGCTTAGATCTGTGGGATTGGTGATGGGATAGTCGGATTTGTCCATGTATTTGATACTTTCCCGGGTTGATTGCCATGGATTTGCGGGATATGGCATTA
CCTTTCTCTGTGCTGACTGCGGGGGGATGGGGATCTGGGTGGGGGTTCGCTACGATTCTCTGCTTGATGTGGAGACTgGGCGGTTGAGATCGGAACTTGTTGGTGATAGATCTGCCTGTATGCTTCGTGTTGCATTGAATGGTGCTTAGATCTGTGGGATTGGTGATGGGATAGTCGGACTTGTCCATGTATTTGATACTTTCCCGGGTTGATTGCCATGGATTTGCGGGATATGGCATTA	9	32	Insertion	0.01	1	PFSVLTAGGWGSGWGFATILCLMWRLGG*	PFSVLTAGGWGSGWGFATILCLMWRRAVEIGTCW*	CCTTTCTCTGTGCTGACTGCGGGGGGATGGGGATCTGGGTGGGGGTTCGCTACGATTCTCTGCTTGATGTGGAGACTGGGCGGTTGAGATCGGAACTTGTTGGTGATAGATCTGCCTGTATGCTTCGTGTTGCATTGAATGGTGCTTAGATCTGTGGGATTGGTGATGGGATAGTCGGACTTGTCCATGTATTTGATACTTTCCCGGGTTGATTGCCATGGATTTGCGGGATATGGCATTA	CCTTTCTCTGTGCTGACTGCGGGGGGATGGGGATCTGGGTGGGGGTTCGCTACGATTCTCTGCTTGATGTGGAGACGGGCGGTTGAGATCGGAACTTGTTGGTGATAGATCTGCCTGTATGCTTCGTGTTGCATTGAATGGTGCTTAGATCTGTGGGATTGGTGATGGGATAGTCGGATTTGTCCATGTATTTGATACTTTCCCGGGTTGATTGCCATGGATTTGCGGGATATGGCATTA
CCTTTCTCTGTGCTGACTGCGGGGGGATGGGGATCTGGGTGGGGGTTCGCTACGATTCTCTGCTTGATGTGGAGACTgGGCGGTTGAGATCGGAACTTGTTGGTGATAGATCTGCCTGTATGCTTCGTGTTGCATTGAATGGTGCTTAGATCTGTGGGATTGGTGATGGGATAGTCGGATTTGTCCATGTATTTGATGCTTTCCCGGGTTGATTGCCATGGATTTGCGGGATATGGCATTA	9	33	Insertion	0.01	1	PFSVLTAGGWGSGWGFATILCLMWRLGG*	PFSVLTAGGWGSGWGFATILCLMWRRAVEIGTCW*	CCTTTCTCTGTGCTGACTGCGGGGGGATGGGGATCTGGGTGGGGGTTCGCTACGATTCTCTGCTTGATGTGGAGACTGGGCGGTTGAGATCGGAACTTGTTGGTGATAGATCTGCCTGTATGCTTCGTGTTGCATTGAATGGTGCTTAGATCTGTGGGATTGGTGATGGGATAGTCGGATTTGTCCATGTATTTGATGCTTTCCCGGGTTGATTGCCATGGATTTGCGGGATATGGCATTA	CCTTTCTCTGTGCTGACTGCGGGGGGATGGGGATCTGGGTGGGGGTTCGCTACGATTCTCTGCTTGATGTGGAGACGGGCGGTTGAGATCGGAACTTGTTGGTGATAGATCTGCCTGTATGCTTCGTGTTGCATTGAATGGTGCTTAGATCTGTGGGATTGGTGATGGGATAGTCGGATTTGTCCATGTATTTGATACTTTCCCGGGTTGATTGCCATGGATTTGCGGGATATGGCATTA
CCTTTCTCTGTGCTGACTGCGGGGGGATGGGGATCTGGGTGGGGGTTCGCTACGATTCTCTGCTTGATGTGGAGACTgGGCGGTTGAGATCGGAACTTGTTGGTGATGGATCTGCCTGTATGCTTCGTGTTGCATTGAATGGTGCTTAGATCTGTGGGATTGGTGATGGGATAGTCGGATTTGTCCATGTATTTGATACTTTCCCGGGTTGATTGCCATGGATTTGCGGGATATGGCATTA	9	34	Insertion	0.01	1	PFSVLTAGGWGSGWGFATILCLMWRLGG*	PFSVLTAGGWGSGWGFATILCLMWRRAVEIGTCW*	CCTTTCTCTGTGCTGACTGCGGGGGGATGGGGATCTGGGTGGGGGTTCGCTACGATTCTCTGCTTGATGTGGAGACTGGGCGGTTGAGATCGGAACTTGTTGGTGATGGATCTGCCTGTATGCTTCGTGTTGCATTGAATGGTGCTTAGATCTGTGGGATTGGTGATGGGATAGTCGGATTTGTCCATGTATTTGATACTTTCCCGGGTTGATTGCCATGGATTTGCGGGATATGGCATTA	CCTTTCTCTGTGCTGACTGCGGGGGGATGGGGATCTGGGTGGGGGTTCGCTACGATTCTCTGCTTGATGTGGAGACGGGCGGTTGAGATCGGAACTTGTTGGTGATAGATCTGCCTGTATGCTTCGTGTTGCATTGAATGGTGCTTAGATCTGTGGGATTGGTGATGGGATAGTCGGATTTGTCCATGTATTTGATACTTTCCCGGGTTGATTGCCATGGATTTGCGGGATATGGCATTA
CCTTTCTCTGTGCTGACTGCGGGGGGATGGGGATCTGGGTGGGGGTTCGCTACGATTCTCTGCTTGGTGTG-------------GAGATCGGAACTTGTTGGTGATAGATCTGCCTGTATGCTTCGTGTTGCATTGAATGGTGCTTAGATCTGTGGGATTGGTGATGGGATAGTCGGATTTGTCCATGTATTTGATACTTTCCCGGGTTGATTGCCATGGATTTGCGGGATATGGCATTA	9	33	Deletion	0.01	-13	PFSVLTAGGWGSGWGFATILCLVWRSELVGDRSACMLRVALNGA*	PFSVLTAGGWGSGWGFATILCLMWRRAVEIGTCW*	CCTTTCTCTGTGCTGACTGCGGGGGGATGGGGATCTGGGTGGGGGTTCGCTACGATTCTCTGCTTGGTGTG-------------GAGATCGGAACTTGTTGGTGATAGATCTGCCTGTATGCTTCGTGTTGCATTGAATGGTGCTTAGATCTGTGGGATTGGTGATGGGATAGTCGGATTTGTCCATGTATTTGATACTTTCCCGGGTTGATTGCCATGGATTTGCGGGATATGGCATTA	CCTTTCTCTGTGCTGACTGCGGGGGGATGGGGATCTGGGTGGGGGTTCGCTACGATTCTCTGCTTGATGTGGAGACGGGCGGTTGAGATCGGAACTTGTTGGTGATAGATCTGCCTGTATGCTTCGTGTTGCATTGAATGGTGCTTAGATCTGTGGGATTGGTGATGGGATAGTCGGATTTGTCCATGTATTTGATACTTTCCCGGGTTGATTGCCATGGATTTGCGGGATATGGCATTA
CCTTTCTCTGTGCTGACTGCGGGGGGATGGGGATCTGGGTGGGGGTTCGCTACGGTTCTCTGCTTGATGTGGAGACTgGGCGGTTGAGATCGGAACTTGTTGGTGATAGATCTGCCTGTATGCTTCGTGTTGCATTGAATGGTGCTTAGATCTGTGGGATTGGTGATGGGATAGTCGGATTTGTCCATGTATTTGATACTTTCCCGGGTTGATTGCCATGGATTTGCGGGATATGGCATTA	9	33	Insertion	0.01	1	PFSVLTAGGWGSGWGFATVLCLMWRLGG*	PFSVLTAGGWGSGWGFATILCLMWRRAVEIGTCW*	CCTTTCTCTGTGCTGACTGCGGGGGGATGGGGATCTGGGTGGGGGTTCGCTACGGTTCTCTGCTTGATGTGGAGACTGGGCGGTTGAGATCGGAACTTGTTGGTGATAGATCTGCCTGTATGCTTCGTGTTGCATTGAATGGTGCTTAGATCTGTGGGATTGGTGATGGGATAGTCGGATTTGTCCATGTATTTGATACTTTCCCGGGTTGATTGCCATGGATTTGCGGGATATGGCATTA	CCTTTCTCTGTGCTGACTGCGGGGGGATGGGGATCTGGGTGGGGGTTCGCTACGATTCTCTGCTTGATGTGGAGACGGGCGGTTGAGATCGGAACTTGTTGGTGATAGATCTGCCTGTATGCTTCGTGTTGCATTGAATGGTGCTTAGATCTGTGGGATTGGTGATGGGATAGTCGGATTTGTCCATGTATTTGATACTTTCCCGGGTTGATTGCCATGGATTTGCGGGATATGGCATTA
CCTTTCTCTGTGCTGACTGCGGGGGGATGGGGGTCTGGGTGGGGGTTCGCTACGATTCTCTGCTTGATGTGG---CGGGCGGTTGAGATCGGAACTTGTTGGTGATAGATCTGCCTGTATGCTTCGTGTTGCATTGAATGGTGCTTAGATCTGTGGGATTGGTGATGGGATAGTCGGATTTGTCCATGTATTTGATACTTTCCCGGGTTGATTGCCATGGATTTGCGGGATATGGCATTA	9	28	Deletion	0.01	-3	PFSVLTAGGWGSGWGFATILCLMWRAVEIGTCW*	PFSVLTAGGWGSGWGFATILCLMWRRAVEIGTCW*	CCTTTCTCTGTGCTGACTGCGGGGGGATGGGGGTCTGGGTGGGGGTTCGCTACGATTCTCTGCTTGATGTGG---CGGGCGGTTGAGATCGGAACTTGTTGGTGATAGATCTGCCTGTATGCTTCGTGTTGCATTGAATGGTGCTTAGATCTGTGGGATTGGTGATGGGATAGTCGGATTTGTCCATGTATTTGATACTTTCCCGGGTTGATTGCCATGGATTTGCGGGATATGGCATTA	CCTTTCTCTGTGCTGACTGCGGGGGGATGGGGATCTGGGTGGGGGTTCGCTACGATTCTCTGCTTGATGTGGAGACGGGCGGTTGAGATCGGAACTTGTTGGTGATAGATCTGCCTGTATGCTTCGTGTTGCATTGAATGGTGCTTAGATCTGTGGGATTGGTGATGGGATAGTCGGATTTGTCCATGTATTTGATACTTTCCCGGGTTGATTGCCATGGATTTGCGGGATATGGCATTA
CCTTTCTCTGTGCTGACTGCGgGGGGGATGGGGATCTGGGTGGGGGTTCGCTACGATTCTCTGCTTGATGTGGAGACGGGCGGTTGAGATCGGAACTTGTTGGTGATAGATCTGCCTGTATGCTTCGTGTTGCATTGAATGGTGCTTAGATCTGTGGGATTGGTGATGGGATAGTCGGATTTGTCCATGTATTTGATACTTTCCCGGGTTGATTGCCATGGATTTGCGGGATATGGCATTA	9	33	Insertion	0.01	1	PFSVLTAGGMGIWVGVRYDSLLDVETGG*	PFSVLTAGGWGSGWGFATILCLMWRRAVEIGTCW*	CCTTTCTCTGTGCTGACTGCGGGGGGGATGGGGATCTGGGTGGGGGTTCGCTACGATTCTCTGCTTGATGTGGAGACGGGCGGTTGAGATCGGAACTTGTTGGTGATAGATCTGCCTGTATGCTTCGTGTTGCATTGAATGGTGCTTAGATCTGTGGGATTGGTGATGGGATAGTCGGATTTGTCCATGTATTTGATACTTTCCCGGGTTGATTGCCATGGATTTGCGGGATATGGCATTA	CCTTTCTCTGTGCTGACTGCGGGGGGATGGGGATCTGGGTGGGGGTTCGCTACGATTCTCTGCTTGATGTGGAGACGGGCGGTTGAGATCGGAACTTGTTGGTGATAGATCTGCCTGTATGCTTCGTGTTGCATTGAATGGTGCTTAGATCTGTGGGATTGGTGATGGGATAGTCGGATTTGTCCATGTATTTGATACTTTCCCGGGTTGATTGCCATGGATTTGCGGGATATGGCATTA
CCTTTCT-TGTGCTGACTGCGGGGGGATGGGGATCTGGGTGGGGGTTCGCTACGATTCTCTGCTTGATGTGGA---GGGCGGTTGAGATCGGAACTTGTTGGTGATAGATCTGCCTGTATGCTTCGTGTTGCATTGAATGGTGCTTAGATCTGTGGGATTGGTGATGGGATAGTCGGATTTGTCCATGTATTTGATACTTTCCCGGGTTGATTGCCATGGATTTGCGGGATATGGCATTA	8	31	Deletion	0.01	-4	PFLC*	PFSVLTAGGWGSGWGFATILCLMWRRAVEIGTCW*	CCTTTCT-TGTGCTGACTGCGGGGGGATGGGGATCTGGGTGGGGGTTCGCTACGATTCTCTGCTTGATGTGGA---GGGCGGTTGAGATCGGAACTTGTTGGTGATAGATCTGCCTGTATGCTTCGTGTTGCATTGAATGGTGCTTAGATCTGTGGGATTGGTGATGGGATAGTCGGATTTGTCCATGTATTTGATACTTTCCCGGGTTGATTGCCATGGATTTGCGGGATATGGCATTA	CCTTTCTCTGTGCTGACTGCGGGGGGATGGGGATCTGGGTGGGGGTTCGCTACGATTCTCTGCTTGATGTGGAGACGGGCGGTTGAGATCGGAACTTGTTGGTGATAGATCTGCCTGTATGCTTCGTGTTGCATTGAATGGTGCTTAGATCTGTGGGATTGGTGATGGGATAGTCGGATTTGTCCATGTATTTGATACTTTCCCGGGTTGATTGCCATGGATTTGCGGGATATGGCATTA
CCTTTCTC-GTGCTGACTGCGGGGGGATGGGGATCTGGGTGGGGGTTCGCTACGATTCTCTGCTTGATGTGG----GGGCGGTTGAGATCGGAACTTGTTGGTGATAGATCTGCCTGTATGCTTCGTGTTGCATTGAATGGTGCTTAGATCTGTGGGATTGGTGATGGGATAGTCGGATTTGTCCATGTATTTGATACTTTCCCGGGTTGATTGCCATGGATTTGCGGGATATGGCATTA	8	32	Deletion	0.01	-5	PFSC*	PFSVLTAGGWGSGWGFATILCLMWRRAVEIGTCW*	CCTTTCTC-GTGCTGACTGCGGGGGGATGGGGATCTGGGTGGGGGTTCGCTACGATTCTCTGCTTGATGTGG----GGGCGGTTGAGATCGGAACTTGTTGGTGATAGATCTGCCTGTATGCTTCGTGTTGCATTGAATGGTGCTTAGATCTGTGGGATTGGTGATGGGATAGTCGGATTTGTCCATGTATTTGATACTTTCCCGGGTTGATTGCCATGGATTTGCGGGATATGGCATTA	CCTTTCTCTGTGCTGACTGCGGGGGGATGGGGATCTGGGTGGGGGTTCGCTACGATTCTCTGCTTGATGTGGAGACGGGCGGTTGAGATCGGAACTTGTTGGTGATAGATCTGCCTGTATGCTTCGTGTTGCATTGAATGGTGCTTAGATCTGTGGGATTGGTGATGGGATAGTCGGATTTGTCCATGTATTTGATACTTTCCCGGGTTGATTGCCATGGATTTGCGGGATATGGCATTA
CCTTTCTC-GTGCTGACTGCGGGGGGATGGGGATCTGGGTGGGGGTTCGCTACGATTCTCTGCTTGATGTGG---CGGGCGGTTGAGATCGGAACTTGTTGGTGATAGATCTGCCTGTATGCTTCGTGTTGCATTGAATGGTGCTTAGATCTGTGGGATTGGTGATGGGATAGTCGGATTTGTCCATGTATTTGATACTTTCCCGGGTTGATTGCCATGGATTTGCGGGATATGGCATTA	8	30	Deletion	0.01	-4	PFSC*	PFSVLTAGGWGSGWGFATILCLMWRRAVEIGTCW*	CCTTTCTC-GTGCTGACTGCGGGGGGATGGGGATCTGGGTGGGGGTTCGCTACGATTCTCTGCTTGATGTGG---CGGGCGGTTGAGATCGGAACTTGTTGGTGATAGATCTGCCTGTATGCTTCGTGTTGCATTGAATGGTGCTTAGATCTGTGGGATTGGTGATGGGATAGTCGGATTTGTCCATGTATTTGATACTTTCCCGGGTTGATTGCCATGGATTTGCGGGATATGGCATTA	CCTTTCTCTGTGCTGACTGCGGGGGGATGGGGATCTGGGTGGGGGTTCGCTACGATTCTCTGCTTGATGTGGAGACGGGCGGTTGAGATCGGAACTTGTTGGTGATAGATCTGCCTGTATGCTTCGTGTTGCATTGAATGGTGCTTAGATCTGTGGGATTGGTGATGGGATAGTCGGATTTGTCCATGTATTTGATACTTTCCCGGGTTGATTGCCATGGATTTGCGGGATATGGCATTA
CCTTTCTCTGTGC-GACTGCGGGGGGATGGGGATCTGGGTGGGGGTTCGCTACGATTCTCTGCTTGATGTGGAGACTgGGCGGTTGAGATCGGAACTTGTTGGTGATAGATCTGCCTGTATGCTTCGTGTTGCATTGAATGGTGCTTAGATCTGTGGGATTGGTGATGGGATAGTCGGATTTGTCCATGTATTTGATACTTTCCCGGGTTGATTGCCATGGATTTGCGGGATATGGCATTA	8	34	Insertion and Deletion	0.01	0	PFSVRLRGDGDLGGGSLRFSA*	PFSVLTAGGWGSGWGFATILCLMWRRAVEIGTCW*	CCTTTCTCTGTGC-GACTGCGGGGGGATGGGGATCTGGGTGGGGGTTCGCTACGATTCTCTGCTTGATGTGGAGACTGGGCGGTTGAGATCGGAACTTGTTGGTGATAGATCTGCCTGTATGCTTCGTGTTGCATTGAATGGTGCTTAGATCTGTGGGATTGGTGATGGGATAGTCGGATTTGTCCATGTATTTGATACTTTCCCGGGTTGATTGCCATGGATTTGCGGGATATGGCATTA	CCTTTCTCTGTGCTGACTGCGGGGGGATGGGGATCTGGGTGGGGGTTCGCTACGATTCTCTGCTTGATGTGGAGACGGGCGGTTGAGATCGGAACTTGTTGGTGATAGATCTGCCTGTATGCTTCGTGTTGCATTGAATGGTGCTTAGATCTGTGGGATTGGTGATGGGATAGTCGGATTTGTCCATGTATTTGATACTTTCCCGGGTTGATTGCCATGGATTTGCGGGATATGGCATTA
CCTTTCTCTGTGCTGACTGCGGGAGGATGGGGATCTGGGTGGGGGTTCGCTACGATTCTCTGCTTGATGTGGAGACTgGGCGGTTGAGATCGGAACTTGTTGGTGATAGATCTGCCTGTATGCTTCGTGTTGCATTGAATGGTGCTTAGATCTGTGGGATTGGTGATGGGATAGTCGGATTTGTCCATGTATTTGATACTTTCCCGGGTTGATTGCCATGGATTTGCGGGATATGGCATTA	8	34	Insertion	0.01	1	PFSVLTAGGWGSGWGFATILCLMWRLGG*	PFSVLTAGGWGSGWGFATILCLMWRRAVEIGTCW*	CCTTTCTCTGTGCTGACTGCGGGAGGATGGGGATCTGGGTGGGGGTTCGCTACGATTCTCTGCTTGATGTGGAGACTGGGCGGTTGAGATCGGAACTTGTTGGTGATAGATCTGCCTGTATGCTTCGTGTTGCATTGAATGGTGCTTAGATCTGTGGGATTGGTGATGGGATAGTCGGATTTGTCCATGTATTTGATACTTTCCCGGGTTGATTGCCATGGATTTGCGGGATATGGCATTA	CCTTTCTCTGTGCTGACTGCGGGGGGATGGGGATCTGGGTGGGGGTTCGCTACGATTCTCTGCTTGATGTGGAGACGGGCGGTTGAGATCGGAACTTGTTGGTGATAGATCTGCCTGTATGCTTCGTGTTGCATTGAATGGTGCTTAGATCTGTGGGATTGGTGATGGGATAGTCGGATTTGTCCATGTATTTGATACTTTCCCGGGTTGATTGCCATGGATTTGCGGGATATGGCATTA
CCTTTCTCTGTGCTGACTGCGGGGGGACGGGGATCTGGGTGGGGGTTCGCTACGATTCTCTGCTTGATGTGG---CGGGCGGTTGAGATCGGAACTTGTTGGTGATAGATCTGCCTGTATGCTTCGTGTTGCATTGAATGGTGCTTAGATCTGTGGGATTGGTGATGGGATAGTCGGATTTGTCCATGTATTTGATACTTTCCCGGGTTGATTGCCATGGATTTGCGGGATATGGCATTA	8	29	Deletion	0.01	-3	PFSVLTAGGRGSGWGFATILCLMWRAVEIGTCW*	PFSVLTAGGWGSGWGFATILCLMWRRAVEIGTCW*	CCTTTCTCTGTGCTGACTGCGGGGGGACGGGGATCTGGGTGGGGGTTCGCTACGATTCTCTGCTTGATGTGG---CGGGCGGTTGAGATCGGAACTTGTTGGTGATAGATCTGCCTGTATGCTTCGTGTTGCATTGAATGGTGCTTAGATCTGTGGGATTGGTGATGGGATAGTCGGATTTGTCCATGTATTTGATACTTTCCCGGGTTGATTGCCATGGATTTGCGGGATATGGCATTA	CCTTTCTCTGTGCTGACTGCGGGGGGATGGGGATCTGGGTGGGGGTTCGCTACGATTCTCTGCTTGATGTGGAGACGGGCGGTTGAGATCGGAACTTGTTGGTGATAGATCTGCCTGTATGCTTCGTGTTGCATTGAATGGTGCTTAGATCTGTGGGATTGGTGATGGGATAGTCGGATTTGTCCATGTATTTGATACTTTCCCGGGTTGATTGCCATGGATTTGCGGGATATGGCATTA
CCTTTCTCTGTGCTGACTGCGGGGGGATGGGGACCTGGGTGGGGGTTCGCTACGATTCTCTGCTTGATGTGGAGACTgGGCGGTTGAGATCGGAACTTGTTGGTGATAGATCTGCCTGTATGCTTCGTGTTGCATTGAATGGTGCTTAGATCTGTGGGATTGGTGATGGGATAGTCGGATTTGTCCATGTATTTGATACTTTCCCGGGTTGATTGCCATGGATTTGCGGGATATGGCATTA	8	33	Insertion	0.01	1	PFSVLTAGGWGPGWGFATILCLMWRLGG*	PFSVLTAGGWGSGWGFATILCLMWRRAVEIGTCW*	CCTTTCTCTGTGCTGACTGCGGGGGGATGGGGACCTGGGTGGGGGTTCGCTACGATTCTCTGCTTGATGTGGAGACTGGGCGGTTGAGATCGGAACTTGTTGGTGATAGATCTGCCTGTATGCTTCGTGTTGCATTGAATGGTGCTTAGATCTGTGGGATTGGTGATGGGATAGTCGGATTTGTCCATGTATTTGATACTTTCCCGGGTTGATTGCCATGGATTTGCGGGATATGGCATTA	CCTTTCTCTGTGCTGACTGCGGGGGGATGGGGATCTGGGTGGGGGTTCGCTACGATTCTCTGCTTGATGTGGAGACGGGCGGTTGAGATCGGAACTTGTTGGTGATAGATCTGCCTGTATGCTTCGTGTTGCATTGAATGGTGCTTAGATCTGTGGGATTGGTGATGGGATAGTCGGATTTGTCCATGTATTTGATACTTTCCCGGGTTGATTGCCATGGATTTGCGGGATATGGCATTA
CCTTTCTCTGTGCTGACTGCGGGGGGATGGGGATCTGGGAGGGGGTTCGCTACGATTCTCTGCTTGATGTGG----GGGCGGTTGAGATCGGAACTTGTTGGTGATAGATCTGCCTGTATGCTTCGTGTTGCATTGAATGGTGCTTAGATCTGTGGGATTGGTGATGGGATAGTCGGATTTGTCCATGTATTTGATACTTTCCCGGGTTGATTGCCATGGATTTGCGGGATATGGCATTA	8	28	Deletion	0.01	-4	PFSVLTAGGWGSGRGFATILCLMWGRLRSELVGDRSACMLRVALNGA*	PFSVLTAGGWGSGWGFATILCLMWRRAVEIGTCW*	CCTTTCTCTGTGCTGACTGCGGGGGGATGGGGATCTGGGAGGGGGTTCGCTACGATTCTCTGCTTGATGTGG----GGGCGGTTGAGATCGGAACTTGTTGGTGATAGATCTGCCTGTATGCTTCGTGTTGCATTGAATGGTGCTTAGATCTGTGGGATTGGTGATGGGATAGTCGGATTTGTCCATGTATTTGATACTTTCCCGGGTTGATTGCCATGGATTTGCGGGATATGGCATTA	CCTTTCTCTGTGCTGACTGCGGGGGGATGGGGATCTGGGTGGGGGTTCGCTACGATTCTCTGCTTGATGTGGAGACGGGCGGTTGAGATCGGAACTTGTTGGTGATAGATCTGCCTGTATGCTTCGTGTTGCATTGAATGGTGCTTAGATCTGTGGGATTGGTGATGGGATAGTCGGATTTGTCCATGTATTTGATACTTTCCCGGGTTGATTGCCATGGATTTGCGGGATATGGCATTA
CCTTTCTCTGTGCTGACTGCGGGGGGATGGGGATCTGGGAGGGGGTTCGCTACGATTCTCTGCTTGATGTGGAGACGGGCGGTTGAGATCGGAACTTGTTGGTGATAGATCTGCCTGTATGCTTCGTGTTGCATTGAATGGTGCTTAGATCTGTGGGATTGGTGATGGGATAGTCGGATTTGTCCATGTATTTGATACTTTCCCGGGTTGATTGCCATGGATTTGCGGGATATGGCATTA	8	28	1 Base Change	0.01	0	PFSVLTAGGWGSGRGFATILCLMWRRAVEIGTCW*	PFSVLTAGGWGSGWGFATILCLMWRRAVEIGTCW*	CCTTTCTCTGTGCTGACTGCGGGGGGATGGGGATCTGGGAGGGGGTTCGCTACGATTCTCTGCTTGATGTGGAGACGGGCGGTTGAGATCGGAACTTGTTGGTGATAGATCTGCCTGTATGCTTCGTGTTGCATTGAATGGTGCTTAGATCTGTGGGATTGGTGATGGGATAGTCGGATTTGTCCATGTATTTGATACTTTCCCGGGTTGATTGCCATGGATTTGCGGGATATGGCATTA	CCTTTCTCTGTGCTGACTGCGGGGGGATGGGGATCTGGGTGGGGGTTCGCTACGATTCTCTGCTTGATGTGGAGACGGGCGGTTGAGATCGGAACTTGTTGGTGATAGATCTGCCTGTATGCTTCGTGTTGCATTGAATGGTGCTTAGATCTGTGGGATTGGTGATGGGATAGTCGGATTTGTCCATGTATTTGATACTTTCCCGGGTTGATTGCCATGGATTTGCGGGATATGGCATTA
CCTTTCTCTGTGCTGACTGCGGGGGGATGGGGATCTGGGCGGGGGTTCGCTACGATTCTCTGCTTGATGTGG----GGGCGGTTGAGATCGGAACTTGTTGGTGATAGATCTGCCTGTATGCTTCGTGTTGCATTGAATGGTGCTTAGATCTGTGGGATTGGTGATGGGATAGTCGGATTTGTCCATGTATTTGATACTTTCCCGGGTTGATTGCCATGGATTTGCGGGATATGGCATTA	8	29	Deletion	0.01	-4	PFSVLTAGGWGSGRGFATILCLMWGRLRSELVGDRSACMLRVALNGA*	PFSVLTAGGWGSGWGFATILCLMWRRAVEIGTCW*	CCTTTCTCTGTGCTGACTGCGGGGGGATGGGGATCTGGGCGGGGGTTCGCTACGATTCTCTGCTTGATGTGG----GGGCGGTTGAGATCGGAACTTGTTGGTGATAGATCTGCCTGTATGCTTCGTGTTGCATTGAATGGTGCTTAGATCTGTGGGATTGGTGATGGGATAGTCGGATTTGTCCATGTATTTGATACTTTCCCGGGTTGATTGCCATGGATTTGCGGGATATGGCATTA	CCTTTCTCTGTGCTGACTGCGGGGGGATGGGGATCTGGGTGGGGGTTCGCTACGATTCTCTGCTTGATGTGGAGACGGGCGGTTGAGATCGGAACTTGTTGGTGATAGATCTGCCTGTATGCTTCGTGTTGCATTGAATGGTGCTTAGATCTGTGGGATTGGTGATGGGATAGTCGGATTTGTCCATGTATTTGATACTTTCCCGGGTTGATTGCCATGGATTTGCGGGATATGGCATTA
CCTTTCTCTGTGCTGACTGCGGGGGGATGGGGATCTGGGTGGGGGTTCGCTACGATTCTCTGC-------------------TTGAGATCGGAACTTGTTGGTGATAGATCTGCCTGTATGCTTCGTGTTGCATTGAATGGTGCTTAGATCTGTGGGATTGGTGATGGGATAGTCGGATTTGTCCATGTATTTGATACTTTCCCGGGTTGATTGCCATGGATTTGCGGGATAT-GCATTA	8	34	Deletion	0.01	-20	PFSVLTAGGWGSGWGFATILCLRSELVGDRSACMLRVALNGA*	PFSVLTAGGWGSGWGFATILCLMWRRAVEIGTCW*	CCTTTCTCTGTGCTGACTGCGGGGGGATGGGGATCTGGGTGGGGGTTCGCTACGATTCTCTGC-------------------TTGAGATCGGAACTTGTTGGTGATAGATCTGCCTGTATGCTTCGTGTTGCATTGAATGGTGCTTAGATCTGTGGGATTGGTGATGGGATAGTCGGATTTGTCCATGTATTTGATACTTTCCCGGGTTGATTGCCATGGATTTGCGGGATAT-GCATTA	CCTTTCTCTGTGCTGACTGCGGGGGGATGGGGATCTGGGTGGGGGTTCGCTACGATTCTCTGCTTGATGTGGAGACGGGCGGTTGAGATCGGAACTTGTTGGTGATAGATCTGCCTGTATGCTTCGTGTTGCATTGAATGGTGCTTAGATCTGTGGGATTGGTGATGGGATAGTCGGATTTGTCCATGTATTTGATACTTTCCCGGGTTGATTGCCATGGATTTGCGGGATATGGCATTA
CCTTTCTCTGTGCTGACTGCGGGGGGATGGGGATCTGGGTGGGGGTTCGCTACGATTCTCTGCTCGATGTGGAGACTgGGCGGTTGAGATCGGAACTTGTTGGTGATAGATCTGCCTGTATGCTTCGTGTTGCATTGAATGGTGCTTAGATCTGTGGGATTGGTGATGGGATAGTCGGATTTGTCCATGTATTTGATACTTTCCCGGGTTGATTGCCATGGATTTGCGGGATATGGCATTA	8	34	Insertion	0.01	1	PFSVLTAGGWGSGWGFATILCSMWRLGG*	PFSVLTAGGWGSGWGFATILCLMWRRAVEIGTCW*	CCTTTCTCTGTGCTGACTGCGGGGGGATGGGGATCTGGGTGGGGGTTCGCTACGATTCTCTGCTCGATGTGGAGACTGGGCGGTTGAGATCGGAACTTGTTGGTGATAGATCTGCCTGTATGCTTCGTGTTGCATTGAATGGTGCTTAGATCTGTGGGATTGGTGATGGGATAGTCGGATTTGTCCATGTATTTGATACTTTCCCGGGTTGATTGCCATGGATTTGCGGGATATGGCATTA	CCTTTCTCTGTGCTGACTGCGGGGGGATGGGGATCTGGGTGGGGGTTCGCTACGATTCTCTGCTTGATGTGGAGACGGGCGGTTGAGATCGGAACTTGTTGGTGATAGATCTGCCTGTATGCTTCGTGTTGCATTGAATGGTGCTTAGATCTGTGGGATTGGTGATGGGATAGTCGGATTTGTCCATGTATTTGATACTTTCCCGGGTTGATTGCCATGGATTTGCGGGATATGGCATTA
CCTTTCTCTGTGCTGACTGCGGGGGGATGGGGATCTGGGTGGGGGTTCGCTACGATTCTCTGCTTGATCTGG----GTgGCGGTTGAGATCGGAACTTGTTGGTGATAGATCTGCCTGTATGCTTCGTGTTGCATTGAATGGTGCTTAGATCTGTGGGATTGGTGATGGGATAGTCGGATTTGTCCATGTATTTGATACTTTCCCGGGTTGATTGCCATGGATTTGCGGGATATGGCATTA	8	33	Insertion and Deletion	0.01	-3	PFSVLTAGGWGSGWGFATILCLIWVAVEIGTCW*	PFSVLTAGGWGSGWGFATILCLMWRRAVEIGTCW*	CCTTTCTCTGTGCTGACTGCGGGGGGATGGGGATCTGGGTGGGGGTTCGCTACGATTCTCTGCTTGATCTGG----GTGGCGGTTGAGATCGGAACTTGTTGGTGATAGATCTGCCTGTATGCTTCGTGTTGCATTGAATGGTGCTTAGATCTGTGGGATTGGTGATGGGATAGTCGGATTTGTCCATGTATTTGATACTTTCCCGGGTTGATTGCCATGGATTTGCGGGATATGGCATTA	CCTTTCTCTGTGCTGACTGCGGGGGGATGGGGATCTGGGTGGGGGTTCGCTACGATTCTCTGCTTGATGTGGAGACGGGCGGTTGAGATCGGAACTTGTTGGTGATAGATCTGCCTGTATGCTTCGTGTTGCATTGAATGGTGCTTAGATCTGTGGGATTGGTGATGGGATAGTCGGATTTGTCCATGTATTTGATACTTTCCCGGGTTGATTGCCATGGATTTGCGGGATATGGCATTA
CCTTTCTCTGTGCTGACTGCGGGGGGATGGGGATCTGGGTGGGGGTTCGCTACGATTCTCTGCTTGATGTGG----GGGCGGTTGAGATCGGAACTTGTTGGTGATAGGTCTGCCTGTATGCTTCGTGTTGCATTGAATGGTGCTTAGATCTGTGGGATTGGTGATGGGATAGTCGGATTTGTCCATGTATTTGATACTTTCCCGGGTTGATTGCCATGGATTTGCGGGATATGGCATTA	8	32	Deletion	0.01	-4	PFSVLTAGGWGSGWGFATILCLMWGRLRSELVGDRSACMLRVALNGA*	PFSVLTAGGWGSGWGFATILCLMWRRAVEIGTCW*	CCTTTCTCTGTGCTGACTGCGGGGGGATGGGGATCTGGGTGGGGGTTCGCTACGATTCTCTGCTTGATGTGG----GGGCGGTTGAGATCGGAACTTGTTGGTGATAGGTCTGCCTGTATGCTTCGTGTTGCATTGAATGGTGCTTAGATCTGTGGGATTGGTGATGGGATAGTCGGATTTGTCCATGTATTTGATACTTTCCCGGGTTGATTGCCATGGATTTGCGGGATATGGCATTA	CCTTTCTCTGTGCTGACTGCGGGGGGATGGGGATCTGGGTGGGGGTTCGCTACGATTCTCTGCTTGATGTGGAGACGGGCGGTTGAGATCGGAACTTGTTGGTGATAGATCTGCCTGTATGCTTCGTGTTGCATTGAATGGTGCTTAGATCTGTGGGATTGGTGATGGGATAGTCGGATTTGTCCATGTATTTGATACTTTCCCGGGTTGATTGCCATGGATTTGCGGGATATGGCATTA
CCTTTCTCTGTGCTGACTGCGGGGGGATGGGGATCTGGGTGGGGGTTCGCTACGATTCTCTGCTTGATGTGG---CAGGCGGTTGAGATCGGAACTTGTTGGTGATAGATCTGCCTGTATGCTTCGTGTTGCATTGAATGGTGCTTAGATCTGTGGGATTGGTGATGGGATAGTCGGATTTGTCCATGTATTTGATACTTTCCCGGGTTGATTGCCATGGATTTGCGGGATATGGCATTA	8	32	Deletion	0.01	-3	PFSVLTAGGWGSGWGFATILCLMWQAVEIGTCW*	PFSVLTAGGWGSGWGFATILCLMWRRAVEIGTCW*	CCTTTCTCTGTGCTGACTGCGGGGGGATGGGGATCTGGGTGGGGGTTCGCTACGATTCTCTGCTTGATGTGG---CAGGCGGTTGAGATCGGAACTTGTTGGTGATAGATCTGCCTGTATGCTTCGTGTTGCATTGAATGGTGCTTAGATCTGTGGGATTGGTGATGGGATAGTCGGATTTGTCCATGTATTTGATACTTTCCCGGGTTGATTGCCATGGATTTGCGGGATATGGCATTA	CCTTTCTCTGTGCTGACTGCGGGGGGATGGGGATCTGGGTGGGGGTTCGCTACGATTCTCTGCTTGATGTGGAGACGGGCGGTTGAGATCGGAACTTGTTGGTGATAGATCTGCCTGTATGCTTCGTGTTGCATTGAATGGTGCTTAGATCTGTGGGATTGGTGATGGGATAGTCGGATTTGTCCATGTATTTGATACTTTCCCGGGTTGATTGCCATGGATTTGCGGGATATGGCATTA
CCTTTCTCTGTGCTGACTGCGGGGGGATGGGGATCTGGGTGGGGGTTCGCTACGATTCTCTGCTTGATGTGG---CGGGCGGTTGAGATCGGAACTTGTTGGTGATAGATCTGCCTGTATGCTTCGTGTTGCACTGAATGGTGCTTAGATCTGTGGGATTGGTGATGGGATAGTCGGATTTGTCCATGTATTTGATACTTTCCCGGGTTGATTGCCATGGATTTGCGGGATATGGCATTA	8	29	Deletion	0.01	-3	PFSVLTAGGWGSGWGFATILCLMWRAVEIGTCW*	PFSVLTAGGWGSGWGFATILCLMWRRAVEIGTCW*	CCTTTCTCTGTGCTGACTGCGGGGGGATGGGGATCTGGGTGGGGGTTCGCTACGATTCTCTGCTTGATGTGG---CGGGCGGTTGAGATCGGAACTTGTTGGTGATAGATCTGCCTGTATGCTTCGTGTTGCACTGAATGGTGCTTAGATCTGTGGGATTGGTGATGGGATAGTCGGATTTGTCCATGTATTTGATACTTTCCCGGGTTGATTGCCATGGATTTGCGGGATATGGCATTA	CCTTTCTCTGTGCTGACTGCGGGGGGATGGGGATCTGGGTGGGGGTTCGCTACGATTCTCTGCTTGATGTGGAGACGGGCGGTTGAGATCGGAACTTGTTGGTGATAGATCTGCCTGTATGCTTCGTGTTGCATTGAATGGTGCTTAGATCTGTGGGATTGGTGATGGGATAGTCGGATTTGTCCATGTATTTGATACTTTCCCGGGTTGATTGCCATGGATTTGCGGGATATGGCATTA
CCTTTCTCTGTGCTGACTGCGGGGGGATGGGGATCTGGGTGGGGGTTCGCTACGATTCTCTGCTTGATGTGG---CGGGCGGTTGAGATCGGAACTTGTTGGTGATAGATCTGCCTGTATGCTTCGTGTTGCATTGAATGGTGCTTAGATCTGTGGGATTGGTGATGGGATAGTCGGATTTGTCCATGTATGTGATACTTTCCCGGGTTGATTGCCATGGATTTGCGGGATATGGCATTA	8	31	Deletion	0.01	-3	PFSVLTAGGWGSGWGFATILCLMWRAVEIGTCW*	PFSVLTAGGWGSGWGFATILCLMWRRAVEIGTCW*	CCTTTCTCTGTGCTGACTGCGGGGGGATGGGGATCTGGGTGGGGGTTCGCTACGATTCTCTGCTTGATGTGG---CGGGCGGTTGAGATCGGAACTTGTTGGTGATAGATCTGCCTGTATGCTTCGTGTTGCATTGAATGGTGCTTAGATCTGTGGGATTGGTGATGGGATAGTCGGATTTGTCCATGTATGTGATACTTTCCCGGGTTGATTGCCATGGATTTGCGGGATATGGCATTA	CCTTTCTCTGTGCTGACTGCGGGGGGATGGGGATCTGGGTGGGGGTTCGCTACGATTCTCTGCTTGATGTGGAGACGGGCGGTTGAGATCGGAACTTGTTGGTGATAGATCTGCCTGTATGCTTCGTGTTGCATTGAATGGTGCTTAGATCTGTGGGATTGGTGATGGGATAGTCGGATTTGTCCATGTATTTGATACTTTCCCGGGTTGATTGCCATGGATTTGCGGGATATGGCATTA
CCTTTCTCTGTGCTGACTGCGGGGGGATGGGGATCTGGGTGGGGGTTCGCTACGATTCTCTGCTTGATGTGG---CGGGCGGTTGAGATCGGAACTTGTTGGTGATAGATCTGCCTGTATGCTTCGTGTTGCATTGAATGGTGCTTAGATCTGTGGGATTGGTGATGGGATAGTCGGATTTGTCCATGTATTCGATACTTTCCCGGGTTGATTGCCATGGATTTGCGGGATATGGCATTA	8	29	Deletion	0.01	-3	PFSVLTAGGWGSGWGFATILCLMWRAVEIGTCW*	PFSVLTAGGWGSGWGFATILCLMWRRAVEIGTCW*	CCTTTCTCTGTGCTGACTGCGGGGGGATGGGGATCTGGGTGGGGGTTCGCTACGATTCTCTGCTTGATGTGG---CGGGCGGTTGAGATCGGAACTTGTTGGTGATAGATCTGCCTGTATGCTTCGTGTTGCATTGAATGGTGCTTAGATCTGTGGGATTGGTGATGGGATAGTCGGATTTGTCCATGTATTCGATACTTTCCCGGGTTGATTGCCATGGATTTGCGGGATATGGCATTA	CCTTTCTCTGTGCTGACTGCGGGGGGATGGGGATCTGGGTGGGGGTTCGCTACGATTCTCTGCTTGATGTGGAGACGGGCGGTTGAGATCGGAACTTGTTGGTGATAGATCTGCCTGTATGCTTCGTGTTGCATTGAATGGTGCTTAGATCTGTGGGATTGGTGATGGGATAGTCGGATTTGTCCATGTATTTGATACTTTCCCGGGTTGATTGCCATGGATTTGCGGGATATGGCATTA
CCTTTCTCTGTGCTGACTGCGGGGGGATGGGGATCTGGGTGGGGGTTCGCTACGATTCTCTGCTTGATGTGG---CGGGCGGTTGAGATCGGAACTTGTTGGTGATAGATCTGCCTGTATGCTTCGTGTTGCATTGAATGGTGCTTAGATCTGTGGGATTGGTGATGGGATAGTCGGATTTGTCCATGTATTTGATACTTCCCCGGGTTGATTGCCATGGATTTGCGGGATATGGCATTA	8	29	Deletion	0.01	-3	PFSVLTAGGWGSGWGFATILCLMWRAVEIGTCW*	PFSVLTAGGWGSGWGFATILCLMWRRAVEIGTCW*	CCTTTCTCTGTGCTGACTGCGGGGGGATGGGGATCTGGGTGGGGGTTCGCTACGATTCTCTGCTTGATGTGG---CGGGCGGTTGAGATCGGAACTTGTTGGTGATAGATCTGCCTGTATGCTTCGTGTTGCATTGAATGGTGCTTAGATCTGTGGGATTGGTGATGGGATAGTCGGATTTGTCCATGTATTTGATACTTCCCCGGGTTGATTGCCATGGATTTGCGGGATATGGCATTA	CCTTTCTCTGTGCTGACTGCGGGGGGATGGGGATCTGGGTGGGGGTTCGCTACGATTCTCTGCTTGATGTGGAGACGGGCGGTTGAGATCGGAACTTGTTGGTGATAGATCTGCCTGTATGCTTCGTGTTGCATTGAATGGTGCTTAGATCTGTGGGATTGGTGATGGGATAGTCGGATTTGTCCATGTATTTGATACTTTCCCGGGTTGATTGCCATGGATTTGCGGGATATGGCATTA
CCTTTCTCTGTGCTGACTGCGGGGGGATGGGGATCTGGGTGGGGGTTCGCTACGATTCTCTGCTTGATGTGG---CGGGCGGTTGAGATCGGAACTTGTTGGTGATAGATCTGCCTGTATGCTTCGTGTTGCATTGAATGGTGCTTAGATCTGTGGGATTGGTGATGGGATAGTCGGATTTGTCCATGTATTTGATACTTTCCCGGGTTGACTGCCATGGATTTGCGGGATATGGCATTA	8	30	Deletion	0.01	-3	PFSVLTAGGWGSGWGFATILCLMWRAVEIGTCW*	PFSVLTAGGWGSGWGFATILCLMWRRAVEIGTCW*	CCTTTCTCTGTGCTGACTGCGGGGGGATGGGGATCTGGGTGGGGGTTCGCTACGATTCTCTGCTTGATGTGG---CGGGCGGTTGAGATCGGAACTTGTTGGTGATAGATCTGCCTGTATGCTTCGTGTTGCATTGAATGGTGCTTAGATCTGTGGGATTGGTGATGGGATAGTCGGATTTGTCCATGTATTTGATACTTTCCCGGGTTGACTGCCATGGATTTGCGGGATATGGCATTA	CCTTTCTCTGTGCTGACTGCGGGGGGATGGGGATCTGGGTGGGGGTTCGCTACGATTCTCTGCTTGATGTGGAGACGGGCGGTTGAGATCGGAACTTGTTGGTGATAGATCTGCCTGTATGCTTCGTGTTGCATTGAATGGTGCTTAGATCTGTGGGATTGGTGATGGGATAGTCGGATTTGTCCATGTATTTGATACTTTCCCGGGTTGATTGCCATGGATTTGCGGGATATGGCATTA
CCTTTCTCTGTGCTGACTGCGGGGGGATGGGGATCTGGGTGGGGGTTCGCTACGATTCTCTGCTTGATGTGG---CGGGCGGTTGAGATCGGAACTTGTTGGTGATAGATCTGCCTGTATGCTTCGTGTTGCATTGAATGGTGCTTAGATCTGTGGGATTGGTGATGGGATAGTCGGATTTGTCCATGTATTTGATACTTTCCCGGGTTGATTGCCATGGATTTGCGGGATATGG-ATTA	8	29	Deletion	0.01	-4	PFSVLTAGGWGSGWGFATILCLMWRAVEIGTCW*	PFSVLTAGGWGSGWGFATILCLMWRRAVEIGTCW*	CCTTTCTCTGTGCTGACTGCGGGGGGATGGGGATCTGGGTGGGGGTTCGCTACGATTCTCTGCTTGATGTGG---CGGGCGGTTGAGATCGGAACTTGTTGGTGATAGATCTGCCTGTATGCTTCGTGTTGCATTGAATGGTGCTTAGATCTGTGGGATTGGTGATGGGATAGTCGGATTTGTCCATGTATTTGATACTTTCCCGGGTTGATTGCCATGGATTTGCGGGATATGG-ATTA	CCTTTCTCTGTGCTGACTGCGGGGGGATGGGGATCTGGGTGGGGGTTCGCTACGATTCTCTGCTTGATGTGGAGACGGGCGGTTGAGATCGGAACTTGTTGGTGATAGATCTGCCTGTATGCTTCGTGTTGCATTGAATGGTGCTTAGATCTGTGGGATTGGTGATGGGATAGTCGGATTTGTCCATGTATTTGATACTTTCCCGGGTTGATTGCCATGGATTTGCGGGATATGGCATTA
CCTTTCTCTGTGCTGACTGCGGGGGGATGGGGATCTGGGTGGGGGTTCGCTACGATTCTCTGCTTGATGTGG---CGGGCGGTTGAGATCGGAACTTGTTGGTGATAGATCTGCCTGTATGCTTCGTGTTGCATTGGATGGTGCTTAGATCTGTGGGATTGGTGATGGGATAGTCGGATTTGTCCATGTATTTGATACTTTCCCGGGTTGATTGCCATGGATTTGCGGGATATGGCATTA	8	33	Deletion	0.01	-3	PFSVLTAGGWGSGWGFATILCLMWRAVEIGTCW*	PFSVLTAGGWGSGWGFATILCLMWRRAVEIGTCW*	CCTTTCTCTGTGCTGACTGCGGGGGGATGGGGATCTGGGTGGGGGTTCGCTACGATTCTCTGCTTGATGTGG---CGGGCGGTTGAGATCGGAACTTGTTGGTGATAGATCTGCCTGTATGCTTCGTGTTGCATTGGATGGTGCTTAGATCTGTGGGATTGGTGATGGGATAGTCGGATTTGTCCATGTATTTGATACTTTCCCGGGTTGATTGCCATGGATTTGCGGGATATGGCATTA	CCTTTCTCTGTGCTGACTGCGGGGGGATGGGGATCTGGGTGGGGGTTCGCTACGATTCTCTGCTTGATGTGGAGACGGGCGGTTGAGATCGGAACTTGTTGGTGATAGATCTGCCTGTATGCTTCGTGTTGCATTGAATGGTGCTTAGATCTGTGGGATTGGTGATGGGATAGTCGGATTTGTCCATGTATTTGATACTTTCCCGGGTTGATTGCCATGGATTTGCGGGATATGGCATTA
CCTTTCTCTGTGCTGACTGCGGGGGGATGGGGATCTGGGTGGGGGTTCGCTACGATTCTCTGCTTGATGTGGA---GGGCGGTTGAGATCGGAACTTGTTGGTGATAGATCCGCCTGTATGCTTCGTGTTGCATTGAATGGTGCTTAGATCTGTGGGATTGGTGATGGGATAGTCGGATTTGTCCATGTATTTGATACTTTCCCGGGTTGATTGCCATGGATTTGCGGGATATGGCATTA	8	32	Deletion	0.01	-3	PFSVLTAGGWGSGWGFATILCLMWRAVEIGTCW*	PFSVLTAGGWGSGWGFATILCLMWRRAVEIGTCW*	CCTTTCTCTGTGCTGACTGCGGGGGGATGGGGATCTGGGTGGGGGTTCGCTACGATTCTCTGCTTGATGTGGA---GGGCGGTTGAGATCGGAACTTGTTGGTGATAGATCCGCCTGTATGCTTCGTGTTGCATTGAATGGTGCTTAGATCTGTGGGATTGGTGATGGGATAGTCGGATTTGTCCATGTATTTGATACTTTCCCGGGTTGATTGCCATGGATTTGCGGGATATGGCATTA	CCTTTCTCTGTGCTGACTGCGGGGGGATGGGGATCTGGGTGGGGGTTCGCTACGATTCTCTGCTTGATGTGGAGACGGGCGGTTGAGATCGGAACTTGTTGGTGATAGATCTGCCTGTATGCTTCGTGTTGCATTGAATGGTGCTTAGATCTGTGGGATTGGTGATGGGATAGTCGGATTTGTCCATGTATTTGATACTTTCCCGGGTTGATTGCCATGGATTTGCGGGATATGGCATTA
CCTTTCTCTGTGCTGACTGCGGGGGGATGGGGATCTGGGTGGGGGTTCGCTACGATTCTCTGCTTGATGTGGA---GGGCGGTTGAGATCGGAACTTGTTGGTGATAGATCTGCCTGTATGCTTCGTGTCGCATTGAATGGTGCTTAGATCTGTGGGATTGGTGATGGGATAGTCGGATTTGTCCATGTATTTGATACTTTCCCGGGTTGATTGCCATGGATTTGCGGGATATGGCATTA	8	34	Deletion	0.01	-3	PFSVLTAGGWGSGWGFATILCLMWRAVEIGTCW*	PFSVLTAGGWGSGWGFATILCLMWRRAVEIGTCW*	CCTTTCTCTGTGCTGACTGCGGGGGGATGGGGATCTGGGTGGGGGTTCGCTACGATTCTCTGCTTGATGTGGA---GGGCGGTTGAGATCGGAACTTGTTGGTGATAGATCTGCCTGTATGCTTCGTGTCGCATTGAATGGTGCTTAGATCTGTGGGATTGGTGATGGGATAGTCGGATTTGTCCATGTATTTGATACTTTCCCGGGTTGATTGCCATGGATTTGCGGGATATGGCATTA	CCTTTCTCTGTGCTGACTGCGGGGGGATGGGGATCTGGGTGGGGGTTCGCTACGATTCTCTGCTTGATGTGGAGACGGGCGGTTGAGATCGGAACTTGTTGGTGATAGATCTGCCTGTATGCTTCGTGTTGCATTGAATGGTGCTTAGATCTGTGGGATTGGTGATGGGATAGTCGGATTTGTCCATGTATTTGATACTTTCCCGGGTTGATTGCCATGGATTTGCGGGATATGGCATTA
CCTTTCTCTGTGCTGACTGCGGGGGGATGGGGATCTGGGTGGGGGTTCGCTACGATTCTCTGCTTGATGTGGA---GGGCGGTTGAGATCGGAACTTGTTGGTGATGGATCTGCCTGTATGCTTCGTGTTGCATTGAATGGTGCTTAGATCTGTGGGATTGGTGATGGGATAGTCGGATTTGTCCATGTATTTGATACTTTCCCGGGTTGATTGCCATGGATTTGCGGGATATGGCATTA	8	34	Deletion	0.01	-3	PFSVLTAGGWGSGWGFATILCLMWRAVEIGTCW*	PFSVLTAGGWGSGWGFATILCLMWRRAVEIGTCW*	CCTTTCTCTGTGCTGACTGCGGGGGGATGGGGATCTGGGTGGGGGTTCGCTACGATTCTCTGCTTGATGTGGA---GGGCGGTTGAGATCGGAACTTGTTGGTGATGGATCTGCCTGTATGCTTCGTGTTGCATTGAATGGTGCTTAGATCTGTGGGATTGGTGATGGGATAGTCGGATTTGTCCATGTATTTGATACTTTCCCGGGTTGATTGCCATGGATTTGCGGGATATGGCATTA	CCTTTCTCTGTGCTGACTGCGGGGGGATGGGGATCTGGGTGGGGGTTCGCTACGATTCTCTGCTTGATGTGGAGACGGGCGGTTGAGATCGGAACTTGTTGGTGATAGATCTGCCTGTATGCTTCGTGTTGCATTGAATGGTGCTTAGATCTGTGGGATTGGTGATGGGATAGTCGGATTTGTCCATGTATTTGATACTTTCCCGGGTTGATTGCCATGGATTTGCGGGATATGGCATTA
CCTTTCTCTGTGCTGACTGCGGGGGGATGGGGATCTGGGTGGGGGTTCGCTACGATTCTCTGCTTGATGTGGAGACcGGGCGGTTGAGACCGGAACTTGTTGGTGATAGATCTGCCTGTATGCTTCGTGTTGCATTGAATGGTGCTTAGATCTGTGGGATTGGTGATGGGATAGTCGGATTTGTCCATGTATTTGATACTTTCCCGGGTTGATTGCCATGGATTTGCGGGATATGGCATTA	8	34	Insertion	0.01	1	PFSVLTAGGWGSGWGFATILCLMWRPGG*	PFSVLTAGGWGSGWGFATILCLMWRRAVEIGTCW*	CCTTTCTCTGTGCTGACTGCGGGGGGATGGGGATCTGGGTGGGGGTTCGCTACGATTCTCTGCTTGATGTGGAGACCGGGCGGTTGAGACCGGAACTTGTTGGTGATAGATCTGCCTGTATGCTTCGTGTTGCATTGAATGGTGCTTAGATCTGTGGGATTGGTGATGGGATAGTCGGATTTGTCCATGTATTTGATACTTTCCCGGGTTGATTGCCATGGATTTGCGGGATATGGCATTA	CCTTTCTCTGTGCTGACTGCGGGGGGATGGGGATCTGGGTGGGGGTTCGCTACGATTCTCTGCTTGATGTGGAGACGGGCGGTTGAGATCGGAACTTGTTGGTGATAGATCTGCCTGTATGCTTCGTGTTGCATTGAATGGTGCTTAGATCTGTGGGATTGGTGATGGGATAGTCGGATTTGTCCATGTATTTGATACTTTCCCGGGTTGATTGCCATGGATTTGCGGGATATGGCATTA
CCTTTCTCTGTGCTGACTGCGGGGGGATGGGGATCTGGGTGGGGGTTCGCTACGATTCTCTGCTTGATGTGGAGACcGGGCGGTTGAGATCGGAACCTGTTGGTGATAGATCTGCCTGTATGCTTCGTGTTGCATTGAATGGTGCTTAGATCTGTGGGATTGGTGATGGGATAGTCGGATTTGTCCATGTATTTGATACTTTCCCGGGTTGATTGCCATGGATTTGCGGGATATGGCATTA	8	32	Insertion	0.01	1	PFSVLTAGGWGSGWGFATILCLMWRPGG*	PFSVLTAGGWGSGWGFATILCLMWRRAVEIGTCW*	CCTTTCTCTGTGCTGACTGCGGGGGGATGGGGATCTGGGTGGGGGTTCGCTACGATTCTCTGCTTGATGTGGAGACCGGGCGGTTGAGATCGGAACCTGTTGGTGATAGATCTGCCTGTATGCTTCGTGTTGCATTGAATGGTGCTTAGATCTGTGGGATTGGTGATGGGATAGTCGGATTTGTCCATGTATTTGATACTTTCCCGGGTTGATTGCCATGGATTTGCGGGATATGGCATTA	CCTTTCTCTGTGCTGACTGCGGGGGGATGGGGATCTGGGTGGGGGTTCGCTACGATTCTCTGCTTGATGTGGAGACGGGCGGTTGAGATCGGAACTTGTTGGTGATAGATCTGCCTGTATGCTTCGTGTTGCATTGAATGGTGCTTAGATCTGTGGGATTGGTGATGGGATAGTCGGATTTGTCCATGTATTTGATACTTTCCCGGGTTGATTGCCATGGATTTGCGGGATATGGCATTA
CCTTTCTCTGTGCTGACTGCGGGGGGATGGGGATCTGGGTGGGGGTTCGCTACGATTCTCTGCTTGATGTGGAGACcGGGCGGTTGAGATCGGAACTTGTTGGTGATAGATCTGCCTGTATGCTTCGTGTTGCATTGAATGGTGCTTAGATCTGTGGGATTGGTGATGGGATAGTCGGATTTGTCCATGTATTTGATACTCTCCCGGGTTGATTGCCATGGATTTGCGGGATATGGCATTA	8	33	Insertion	0.01	1	PFSVLTAGGWGSGWGFATILCLMWRPGG*	PFSVLTAGGWGSGWGFATILCLMWRRAVEIGTCW*	CCTTTCTCTGTGCTGACTGCGGGGGGATGGGGATCTGGGTGGGGGTTCGCTACGATTCTCTGCTTGATGTGGAGACCGGGCGGTTGAGATCGGAACTTGTTGGTGATAGATCTGCCTGTATGCTTCGTGTTGCATTGAATGGTGCTTAGATCTGTGGGATTGGTGATGGGATAGTCGGATTTGTCCATGTATTTGATACTCTCCCGGGTTGATTGCCATGGATTTGCGGGATATGGCATTA	CCTTTCTCTGTGCTGACTGCGGGGGGATGGGGATCTGGGTGGGGGTTCGCTACGATTCTCTGCTTGATGTGGAGACGGGCGGTTGAGATCGGAACTTGTTGGTGATAGATCTGCCTGTATGCTTCGTGTTGCATTGAATGGTGCTTAGATCTGTGGGATTGGTGATGGGATAGTCGGATTTGTCCATGTATTTGATACTTTCCCGGGTTGATTGCCATGGATTTGCGGGATATGGCATTA
CCTTTCTCTGTGCTGACTGCGGGGGGATGGGGATCTGGGTGGGGGTTCGCTACGATTCTCTGCTTGATGTGGAGACcGGGCGGTTGAGATCGGAACTTGTTGGTGATAGATCTGCCTGTATGCTTCGTGTTGCATTGAATGGTGCTTAGATCTGTGGGATTGGTGATGGGATAGTCGGATTTGTCCATGTATTTGATACTTTCCCGGGTCGATTGCCATGGATTTGCGGGATATGGCATTA	8	33	Insertion	0.01	1	PFSVLTAGGWGSGWGFATILCLMWRPGG*	PFSVLTAGGWGSGWGFATILCLMWRRAVEIGTCW*	CCTTTCTCTGTGCTGACTGCGGGGGGATGGGGATCTGGGTGGGGGTTCGCTACGATTCTCTGCTTGATGTGGAGACCGGGCGGTTGAGATCGGAACTTGTTGGTGATAGATCTGCCTGTATGCTTCGTGTTGCATTGAATGGTGCTTAGATCTGTGGGATTGGTGATGGGATAGTCGGATTTGTCCATGTATTTGATACTTTCCCGGGTCGATTGCCATGGATTTGCGGGATATGGCATTA	CCTTTCTCTGTGCTGACTGCGGGGGGATGGGGATCTGGGTGGGGGTTCGCTACGATTCTCTGCTTGATGTGGAGACGGGCGGTTGAGATCGGAACTTGTTGGTGATAGATCTGCCTGTATGCTTCGTGTTGCATTGAATGGTGCTTAGATCTGTGGGATTGGTGATGGGATAGTCGGATTTGTCCATGTATTTGATACTTTCCCGGGTTGATTGCCATGGATTTGCGGGATATGGCATTA
CCTTTCTCTGTGCTGACTGCGGGGGGATGGGGATCTGGGTGGGGGTTCGCTACGATTCTCTGCTTGATGTGGAGACcGGGCGGTTGAGATCGGAACTTGTTGGTGATAGATCTGCCTGTATGCTTCGTGTTGCATTGAATGGTGCTTAGATCTGTGGGATTGGTGATGGGATAGTCGGATTTGTCCATGTATTTGATACTTTCCCGGGTTGATTGCCATGGATTTGCGGGATATGGC-TTA	8	33	Insertion and Deletion	0.01	0	PFSVLTAGGWGSGWGFATILCLMWRPGG*	PFSVLTAGGWGSGWGFATILCLMWRRAVEIGTCW*	CCTTTCTCTGTGCTGACTGCGGGGGGATGGGGATCTGGGTGGGGGTTCGCTACGATTCTCTGCTTGATGTGGAGACCGGGCGGTTGAGATCGGAACTTGTTGGTGATAGATCTGCCTGTATGCTTCGTGTTGCATTGAATGGTGCTTAGATCTGTGGGATTGGTGATGGGATAGTCGGATTTGTCCATGTATTTGATACTTTCCCGGGTTGATTGCCATGGATTTGCGGGATATGGC-TTA	CCTTTCTCTGTGCTGACTGCGGGGGGATGGGGATCTGGGTGGGGGTTCGCTACGATTCTCTGCTTGATGTGGAGACGGGCGGTTGAGATCGGAACTTGTTGGTGATAGATCTGCCTGTATGCTTCGTGTTGCATTGAATGGTGCTTAGATCTGTGGGATTGGTGATGGGATAGTCGGATTTGTCCATGTATTTGATACTTTCCCGGGTTGATTGCCATGGATTTGCGGGATATGGCATTA
CCTTTCTCTGTGCTGACTGCGGGGGGATGGGGATCTGGGTGGGGGTTCGCTACGATTCTCTGCTTGATGTGGAGACGGGCGGTTGAGATCGGAACTTGTTGGTGATAGATCTGCCTGTATACTTCGTGTTGCATTGAATGGTGCTTAGATCTGTGGGATTGGTGATGGGATAGTCGGATTTGTCCATGTATTTGATACTTTCCCGGGTTGATTGCCATGGATTTGCGGGATATGGCATTA	8	33	1 Base Change	0.01	0	PFSVLTAGGWGSGWGFATILCLMWRRAVEIGTCW*	PFSVLTAGGWGSGWGFATILCLMWRRAVEIGTCW*	CCTTTCTCTGTGCTGACTGCGGGGGGATGGGGATCTGGGTGGGGGTTCGCTACGATTCTCTGCTTGATGTGGAGACGGGCGGTTGAGATCGGAACTTGTTGGTGATAGATCTGCCTGTATACTTCGTGTTGCATTGAATGGTGCTTAGATCTGTGGGATTGGTGATGGGATAGTCGGATTTGTCCATGTATTTGATACTTTCCCGGGTTGATTGCCATGGATTTGCGGGATATGGCATTA	CCTTTCTCTGTGCTGACTGCGGGGGGATGGGGATCTGGGTGGGGGTTCGCTACGATTCTCTGCTTGATGTGGAGACGGGCGGTTGAGATCGGAACTTGTTGGTGATAGATCTGCCTGTATGCTTCGTGTTGCATTGAATGGTGCTTAGATCTGTGGGATTGGTGATGGGATAGTCGGATTTGTCCATGTATTTGATACTTTCCCGGGTTGATTGCCATGGATTTGCGGGATATGGCATTA
CCTTTCTCTGTGCTGACTGCGGGGGGATGGGGATCTGGGTGGGGGTTCGCTACGATTCTCTGCTTGATGTGGAGACGGGCGGTTGAGATCGGAACTTGTTGGTGATAGATCTGCCTGTATGCTTCATGTTGCATTGAATGGTGCTTAGATCTGTGGGATTGGTGATGGGATAGTCGGATTTGTCCATGTATTTGATACTTTCCCGGGTTGATTGCCATGGATTTGCGGGATATGGCATTA	8	34	1 Base Change	0.01	0	PFSVLTAGGWGSGWGFATILCLMWRRAVEIGTCW*	PFSVLTAGGWGSGWGFATILCLMWRRAVEIGTCW*	CCTTTCTCTGTGCTGACTGCGGGGGGATGGGGATCTGGGTGGGGGTTCGCTACGATTCTCTGCTTGATGTGGAGACGGGCGGTTGAGATCGGAACTTGTTGGTGATAGATCTGCCTGTATGCTTCATGTTGCATTGAATGGTGCTTAGATCTGTGGGATTGGTGATGGGATAGTCGGATTTGTCCATGTATTTGATACTTTCCCGGGTTGATTGCCATGGATTTGCGGGATATGGCATTA	CCTTTCTCTGTGCTGACTGCGGGGGGATGGGGATCTGGGTGGGGGTTCGCTACGATTCTCTGCTTGATGTGGAGACGGGCGGTTGAGATCGGAACTTGTTGGTGATAGATCTGCCTGTATGCTTCGTGTTGCATTGAATGGTGCTTAGATCTGTGGGATTGGTGATGGGATAGTCGGATTTGTCCATGTATTTGATACTTTCCCGGGTTGATTGCCATGGATTTGCGGGATATGGCATTA
CCTTTCTCTGTGCTGACTGCGGGGGGATGGGGATCTGGGTGGGGGTTCGCTACGATTCTCTGCTTGATGTGGAGACGGGCGGTTGAGATCGGAACTTGTTGGTGATAGATCTGCCTGTATGCTTCGTGTTGCATTGAATGGTGCTTAGATCTGTGGGATTGGTGATGAGATAGTCGGATTTGTCCATGTATTTGATACTTTCCCGGGTTGATTGCCATGGATTTGCGGGATATGGCATTA	8	33	1 Base Change	0.01	0	PFSVLTAGGWGSGWGFATILCLMWRRAVEIGTCW*	PFSVLTAGGWGSGWGFATILCLMWRRAVEIGTCW*	CCTTTCTCTGTGCTGACTGCGGGGGGATGGGGATCTGGGTGGGGGTTCGCTACGATTCTCTGCTTGATGTGGAGACGGGCGGTTGAGATCGGAACTTGTTGGTGATAGATCTGCCTGTATGCTTCGTGTTGCATTGAATGGTGCTTAGATCTGTGGGATTGGTGATGAGATAGTCGGATTTGTCCATGTATTTGATACTTTCCCGGGTTGATTGCCATGGATTTGCGGGATATGGCATTA	CCTTTCTCTGTGCTGACTGCGGGGGGATGGGGATCTGGGTGGGGGTTCGCTACGATTCTCTGCTTGATGTGGAGACGGGCGGTTGAGATCGGAACTTGTTGGTGATAGATCTGCCTGTATGCTTCGTGTTGCATTGAATGGTGCTTAGATCTGTGGGATTGGTGATGGGATAGTCGGATTTGTCCATGTATTTGATACTTTCCCGGGTTGATTGCCATGGATTTGCGGGATATGGCATTA
CCTTTCTCTGTGCTGACTGCGGGGGGATGGGGATCTGGGTGGGGGTTCGCTACGATTCTCTGCTTGATGTGGAGACGGGCGGTTGAGATCGGAACTTGTTGGTGATAGATCTGCCTGTATGCTTCGTGTTGCATTGAATGGTGCTTAGATCTGTGGGATTGGTGATGGGATAGTCGGATTTGTCCATGTATTTGATACTTTCCCGGGTTGATTGCCATGGATTTGCGGGATATGG-ATTA	8	33	Deletion	0.01	-1	PFSVLTAGGWGSGWGFATILCLMWRRAVEIGTCW*	PFSVLTAGGWGSGWGFATILCLMWRRAVEIGTCW*	CCTTTCTCTGTGCTGACTGCGGGGGGATGGGGATCTGGGTGGGGGTTCGCTACGATTCTCTGCTTGATGTGGAGACGGGCGGTTGAGATCGGAACTTGTTGGTGATAGATCTGCCTGTATGCTTCGTGTTGCATTGAATGGTGCTTAGATCTGTGGGATTGGTGATGGGATAGTCGGATTTGTCCATGTATTTGATACTTTCCCGGGTTGATTGCCATGGATTTGCGGGATATGG-ATTA	CCTTTCTCTGTGCTGACTGCGGGGGGATGGGGATCTGGGTGGGGGTTCGCTACGATTCTCTGCTTGATGTGGAGACGGGCGGTTGAGATCGGAACTTGTTGGTGATAGATCTGCCTGTATGCTTCGTGTTGCATTGAATGGTGCTTAGATCTGTGGGATTGGTGATGGGATAGTCGGATTTGTCCATGTATTTGATACTTTCCCGGGTTGATTGCCATGGATTTGCGGGATATGGCATTA
CCTTTCTCTGTGCTGACTGCGGGGGGATGGGGATCTGGGTGGGGGTTCGCTACGATTCTCTGCTTGATGTGGAGACGGGCGGTTGAGATCGGAACTTGTTGGTGATAGATCTGCCTGTATGCTTCGTGTTGCATTGAATGGTGCTTAGATCTGTGGGATTGGTGATGGGATAGTCGGATTTGTCCATGTATTTGATACTTTCCTGGGTTGATTGCCATGGATTTGCGGGATATGGCATTA	8	33	1 Base Change	0.01	0	PFSVLTAGGWGSGWGFATILCLMWRRAVEIGTCW*	PFSVLTAGGWGSGWGFATILCLMWRRAVEIGTCW*	CCTTTCTCTGTGCTGACTGCGGGGGGATGGGGATCTGGGTGGGGGTTCGCTACGATTCTCTGCTTGATGTGGAGACGGGCGGTTGAGATCGGAACTTGTTGGTGATAGATCTGCCTGTATGCTTCGTGTTGCATTGAATGGTGCTTAGATCTGTGGGATTGGTGATGGGATAGTCGGATTTGTCCATGTATTTGATACTTTCCTGGGTTGATTGCCATGGATTTGCGGGATATGGCATTA	CCTTTCTCTGTGCTGACTGCGGGGGGATGGGGATCTGGGTGGGGGTTCGCTACGATTCTCTGCTTGATGTGGAGACGGGCGGTTGAGATCGGAACTTGTTGGTGATAGATCTGCCTGTATGCTTCGTGTTGCATTGAATGGTGCTTAGATCTGTGGGATTGGTGATGGGATAGTCGGATTTGTCCATGTATTTGATACTTTCCCGGGTTGATTGCCATGGATTTGCGGGATATGGCATTA
CCTTTCTCTGTGCTGACTGCGGGGGGATGGGGATCTGGGTGGGGGTTCGCTACGATTCTCTGCTTGATGTGGAGACGGGCGGTTGAGATCGGAACTTGTTGGTGATAGATCTGCCTGTATGCTTCGTGTTGCATTGAATGGTGCTTAGATCTGTGGGATTGGTGATGGGATAGTCGGGTTTGTCCATGTATTTGATACTTTCCCGGGTTGATTGCCATGGATTTGCGGGATATGGCATTA	8	34	1 Base Change	0.01	0	PFSVLTAGGWGSGWGFATILCLMWRRAVEIGTCW*	PFSVLTAGGWGSGWGFATILCLMWRRAVEIGTCW*	CCTTTCTCTGTGCTGACTGCGGGGGGATGGGGATCTGGGTGGGGGTTCGCTACGATTCTCTGCTTGATGTGGAGACGGGCGGTTGAGATCGGAACTTGTTGGTGATAGATCTGCCTGTATGCTTCGTGTTGCATTGAATGGTGCTTAGATCTGTGGGATTGGTGATGGGATAGTCGGGTTTGTCCATGTATTTGATACTTTCCCGGGTTGATTGCCATGGATTTGCGGGATATGGCATTA	CCTTTCTCTGTGCTGACTGCGGGGGGATGGGGATCTGGGTGGGGGTTCGCTACGATTCTCTGCTTGATGTGGAGACGGGCGGTTGAGATCGGAACTTGTTGGTGATAGATCTGCCTGTATGCTTCGTGTTGCATTGAATGGTGCTTAGATCTGTGGGATTGGTGATGGGATAGTCGGATTTGTCCATGTATTTGATACTTTCCCGGGTTGATTGCCATGGATTTGCGGGATATGGCATTA
CCTTTCTCTGTGCTGACTGCGGGGGGATGGGGATCTGGGTGGGGGTTCGCTACGATTCTCTGCTTGATGTGGAGACGGGCGGTTGAGATCGGAACTTGTTGGTGATAGATCTGCCTGTATGCTTCGTGTTGCATTGAATGGTGTTTAGATCTGTGGGATTGGTGATGGGATAGTCGGATTTGTCCATGTATTTGATACTTTCCCGGGTTGATTGCCATGGATTTGCGGGATATGGCATTA	8	31	1 Base Change	0.01	0	PFSVLTAGGWGSGWGFATILCLMWRRAVEIGTCW*	PFSVLTAGGWGSGWGFATILCLMWRRAVEIGTCW*	CCTTTCTCTGTGCTGACTGCGGGGGGATGGGGATCTGGGTGGGGGTTCGCTACGATTCTCTGCTTGATGTGGAGACGGGCGGTTGAGATCGGAACTTGTTGGTGATAGATCTGCCTGTATGCTTCGTGTTGCATTGAATGGTGTTTAGATCTGTGGGATTGGTGATGGGATAGTCGGATTTGTCCATGTATTTGATACTTTCCCGGGTTGATTGCCATGGATTTGCGGGATATGGCATTA	CCTTTCTCTGTGCTGACTGCGGGGGGATGGGGATCTGGGTGGGGGTTCGCTACGATTCTCTGCTTGATGTGGAGACGGGCGGTTGAGATCGGAACTTGTTGGTGATAGATCTGCCTGTATGCTTCGTGTTGCATTGAATGGTGCTTAGATCTGTGGGATTGGTGATGGGATAGTCGGATTTGTCCATGTATTTGATACTTTCCCGGGTTGATTGCCATGGATTTGCGGGATATGGCATTA
CCTTTCTCTGTGCTGACTGCGGGGGGATGGGGATCTGGGTGGGGGTTCGCTACGATTCTCTGCTTGATGTGGAGACGGGCGGTTGAGATCGGAACTTGTTGGTGATAGATCTGCCTGTATGTTTCGTGTTGCATTGAATGGTGCTTAGATCTGTGGGATTGGTGATGGGATAGTCGGATTTGTCCATGTATTTGATACTTTCCCGGGTTGATTGCCATGGATTTGCGGGATATGGCATTA	8	34	1 Base Change	0.01	0	PFSVLTAGGWGSGWGFATILCLMWRRAVEIGTCW*	PFSVLTAGGWGSGWGFATILCLMWRRAVEIGTCW*	CCTTTCTCTGTGCTGACTGCGGGGGGATGGGGATCTGGGTGGGGGTTCGCTACGATTCTCTGCTTGATGTGGAGACGGGCGGTTGAGATCGGAACTTGTTGGTGATAGATCTGCCTGTATGTTTCGTGTTGCATTGAATGGTGCTTAGATCTGTGGGATTGGTGATGGGATAGTCGGATTTGTCCATGTATTTGATACTTTCCCGGGTTGATTGCCATGGATTTGCGGGATATGGCATTA	CCTTTCTCTGTGCTGACTGCGGGGGGATGGGGATCTGGGTGGGGGTTCGCTACGATTCTCTGCTTGATGTGGAGACGGGCGGTTGAGATCGGAACTTGTTGGTGATAGATCTGCCTGTATGCTTCGTGTTGCATTGAATGGTGCTTAGATCTGTGGGATTGGTGATGGGATAGTCGGATTTGTCCATGTATTTGATACTTTCCCGGGTTGATTGCCATGGATTTGCGGGATATGGCATTA
CCTTTCTCTGTGCTGACTGCGGGGGGATGGGGATCTGGGTGGGGGTTCGCTACGATTCTCTGCTTGATGTGGAGACGGGCGGTTGAGATCGGAACTTGTTGGTGATAGATCTGTCTGTATGCTTCGTGTTGCATTGAATGGTGCTTAGATCTGTGGGATTGGTGATGGGATAGTCGGATTTGTCCATGTATTTGATACTTTCCCGGGTTGATTGCCATGGATTTGCGGGATATGGCATTA	8	32	1 Base Change	0.01	0	PFSVLTAGGWGSGWGFATILCLMWRRAVEIGTCW*	PFSVLTAGGWGSGWGFATILCLMWRRAVEIGTCW*	CCTTTCTCTGTGCTGACTGCGGGGGGATGGGGATCTGGGTGGGGGTTCGCTACGATTCTCTGCTTGATGTGGAGACGGGCGGTTGAGATCGGAACTTGTTGGTGATAGATCTGTCTGTATGCTTCGTGTTGCATTGAATGGTGCTTAGATCTGTGGGATTGGTGATGGGATAGTCGGATTTGTCCATGTATTTGATACTTTCCCGGGTTGATTGCCATGGATTTGCGGGATATGGCATTA	CCTTTCTCTGTGCTGACTGCGGGGGGATGGGGATCTGGGTGGGGGTTCGCTACGATTCTCTGCTTGATGTGGAGACGGGCGGTTGAGATCGGAACTTGTTGGTGATAGATCTGCCTGTATGCTTCGTGTTGCATTGAATGGTGCTTAGATCTGTGGGATTGGTGATGGGATAGTCGGATTTGTCCATGTATTTGATACTTTCCCGGGTTGATTGCCATGGATTTGCGGGATATGGCATTA
CCTTTCTCTGTGCTGACTGCGGGGGGATGGGGATCTGGGTGGGGGTTCGCTACGATTCTCTGCTTGATGTGGAGACGGGTGGTTGAGATCGGAACTTGTTGGTGATAGATCTGCCTGTATGCTTCGTGTTGCATTGAATGGTGCTTAGATCTGTGGGATTGGTGATGGGATAGTCGGATTTGTCCATGTATTTGATACTTTCCCGGGTTGATTGCCATGGATTTGCGGGATATGGCATTA	8	34	1 Base Change	0.01	0	PFSVLTAGGWGSGWGFATILCLMWRRVVEIGTCW*	PFSVLTAGGWGSGWGFATILCLMWRRAVEIGTCW*	CCTTTCTCTGTGCTGACTGCGGGGGGATGGGGATCTGGGTGGGGGTTCGCTACGATTCTCTGCTTGATGTGGAGACGGGTGGTTGAGATCGGAACTTGTTGGTGATAGATCTGCCTGTATGCTTCGTGTTGCATTGAATGGTGCTTAGATCTGTGGGATTGGTGATGGGATAGTCGGATTTGTCCATGTATTTGATACTTTCCCGGGTTGATTGCCATGGATTTGCGGGATATGGCATTA	CCTTTCTCTGTGCTGACTGCGGGGGGATGGGGATCTGGGTGGGGGTTCGCTACGATTCTCTGCTTGATGTGGAGACGGGCGGTTGAGATCGGAACTTGTTGGTGATAGATCTGCCTGTATGCTTCGTGTTGCATTGAATGGTGCTTAGATCTGTGGGATTGGTGATGGGATAGTCGGATTTGTCCATGTATTTGATACTTTCCCGGGTTGATTGCCATGGATTTGCGGGATATGGCATTA
CCTTTCTCTGTGCTGACTGCGGGGGGATGGGGATCTGGGTGGGGGTTCGCTACGATTCTCTGCTTGATGTGGAGACTgAGCGGTTGAGATCGGAACTTGTTGGTGATAGATCTGCCTGTATGCTTCGTGTTGCATTGAATGGTGCTTAGATCTGTGGGATTGGTGATGGGATAGTCGGATTTGTCCATGTATTTGATACTTTCCCGGGTTGATTGCCATGGATTTGCGGGATATGGCATTA	8	33	Insertion	0.01	1	PFSVLTAGGWGSGWGFATILCLMWRLSG*	PFSVLTAGGWGSGWGFATILCLMWRRAVEIGTCW*	CCTTTCTCTGTGCTGACTGCGGGGGGATGGGGATCTGGGTGGGGGTTCGCTACGATTCTCTGCTTGATGTGGAGACTGAGCGGTTGAGATCGGAACTTGTTGGTGATAGATCTGCCTGTATGCTTCGTGTTGCATTGAATGGTGCTTAGATCTGTGGGATTGGTGATGGGATAGTCGGATTTGTCCATGTATTTGATACTTTCCCGGGTTGATTGCCATGGATTTGCGGGATATGGCATTA	CCTTTCTCTGTGCTGACTGCGGGGGGATGGGGATCTGGGTGGGGGTTCGCTACGATTCTCTGCTTGATGTGGAGACGGGCGGTTGAGATCGGAACTTGTTGGTGATAGATCTGCCTGTATGCTTCGTGTTGCATTGAATGGTGCTTAGATCTGTGGGATTGGTGATGGGATAGTCGGATTTGTCCATGTATTTGATACTTTCCCGGGTTGATTGCCATGGATTTGCGGGATATGGCATTA
CCTTTCTCTGTGCTGACTGCGGGGGGATGGGGATCTGGGTGGGGGTTCGCTACGATTCTCTGCTTGATGTGGAGACTgGGCGGTCGAGATCGGAACTTGTTGGTGATAGATCTGCCTGTATGCTTCGTGTTGCATTGAATGGTGCTTAGATCTGTGGGATTGGTGATGGGATAGTCGGATTTGTCCATGTATTTGATACTTTCCCGGGTTGATTGCCATGGATTTGCGGGATATGGCATTA	8	33	Insertion	0.01	1	PFSVLTAGGWGSGWGFATILCLMWRLGGRDRNLLVIDLPVCFVLH*	PFSVLTAGGWGSGWGFATILCLMWRRAVEIGTCW*	CCTTTCTCTGTGCTGACTGCGGGGGGATGGGGATCTGGGTGGGGGTTCGCTACGATTCTCTGCTTGATGTGGAGACTGGGCGGTCGAGATCGGAACTTGTTGGTGATAGATCTGCCTGTATGCTTCGTGTTGCATTGAATGGTGCTTAGATCTGTGGGATTGGTGATGGGATAGTCGGATTTGTCCATGTATTTGATACTTTCCCGGGTTGATTGCCATGGATTTGCGGGATATGGCATTA	CCTTTCTCTGTGCTGACTGCGGGGGGATGGGGATCTGGGTGGGGGTTCGCTACGATTCTCTGCTTGATGTGGAGACGGGCGGTTGAGATCGGAACTTGTTGGTGATAGATCTGCCTGTATGCTTCGTGTTGCATTGAATGGTGCTTAGATCTGTGGGATTGGTGATGGGATAGTCGGATTTGTCCATGTATTTGATACTTTCCCGGGTTGATTGCCATGGATTTGCGGGATATGGCATTA
CCTTTCTCTGTGCTGACTGCGGGGGGATGGGGATCTGGGTGGGGGTTCGCTACGATTCTCTGCTTGATGTGGAGACTgGGCGGTTGAGATCGGAACTTGTTGGTGATAGATCTGCCTGTATGCTTCGTGTTGCATTGAATGGTGCTTAGATCTGTGGGATTAGTGATGGGATAGTCGGATTTGTCCATGTATTTGATACTTTCCCGGGTTGATTGCCATGGATTTGCGGGATATGGCATTA	8	34	Insertion	0.01	1	PFSVLTAGGWGSGWGFATILCLMWRLGG*	PFSVLTAGGWGSGWGFATILCLMWRRAVEIGTCW*	CCTTTCTCTGTGCTGACTGCGGGGGGATGGGGATCTGGGTGGGGGTTCGCTACGATTCTCTGCTTGATGTGGAGACTGGGCGGTTGAGATCGGAACTTGTTGGTGATAGATCTGCCTGTATGCTTCGTGTTGCATTGAATGGTGCTTAGATCTGTGGGATTAGTGATGGGATAGTCGGATTTGTCCATGTATTTGATACTTTCCCGGGTTGATTGCCATGGATTTGCGGGATATGGCATTA	CCTTTCTCTGTGCTGACTGCGGGGGGATGGGGATCTGGGTGGGGGTTCGCTACGATTCTCTGCTTGATGTGGAGACGGGCGGTTGAGATCGGAACTTGTTGGTGATAGATCTGCCTGTATGCTTCGTGTTGCATTGAATGGTGCTTAGATCTGTGGGATTGGTGATGGGATAGTCGGATTTGTCCATGTATTTGATACTTTCCCGGGTTGATTGCCATGGATTTGCGGGATATGGCATTA
CCTTTCTCTGTGCTGACTGCGGGGGGATGGGGATCTGGGTGGGGGTTCGCTACGATTCTCTGCTTGATGTGGAGACTgGGCGGTTGAGATCGGAACTTGTTGGTGATAGATCTGCCTGTATGCTTCGTGTTGCATTGAATGGTGCTTAGATCTGTGGGATTGGTGATGGGATAGTCGGATTCGTCCATGTATTTGATACTTTCCCGGGTTGATTGCCATGGATTTGCGGGATATGGCATTA	8	34	Insertion	0.01	1	PFSVLTAGGWGSGWGFATILCLMWRLGG*	PFSVLTAGGWGSGWGFATILCLMWRRAVEIGTCW*	CCTTTCTCTGTGCTGACTGCGGGGGGATGGGGATCTGGGTGGGGGTTCGCTACGATTCTCTGCTTGATGTGGAGACTGGGCGGTTGAGATCGGAACTTGTTGGTGATAGATCTGCCTGTATGCTTCGTGTTGCATTGAATGGTGCTTAGATCTGTGGGATTGGTGATGGGATAGTCGGATTCGTCCATGTATTTGATACTTTCCCGGGTTGATTGCCATGGATTTGCGGGATATGGCATTA	CCTTTCTCTGTGCTGACTGCGGGGGGATGGGGATCTGGGTGGGGGTTCGCTACGATTCTCTGCTTGATGTGGAGACGGGCGGTTGAGATCGGAACTTGTTGGTGATAGATCTGCCTGTATGCTTCGTGTTGCATTGAATGGTGCTTAGATCTGTGGGATTGGTGATGGGATAGTCGGATTTGTCCATGTATTTGATACTTTCCCGGGTTGATTGCCATGGATTTGCGGGATATGGCATTA
CCTTTCTCTGTGCTGACTGCGGGGGGATGGGGATCTGGGTGGGGGTTCGCTACGATTCTCTGCTTGATGTGGAGACTgGGCGGTTGAGATCGGAACTTGTTGGTGATAGATCTGCCTGTATGCTTCGTGTTGCATTGAATGGTGCTTAGATCTGTGGGATTGGTGATGGGATAGTCGGATTTGTCCATGTATCTGATACTTTCCCGGGTTGATTGCCATGGATTTGCGGGATATGGCATTA	8	33	Insertion	0.01	1	PFSVLTAGGWGSGWGFATILCLMWRLGG*	PFSVLTAGGWGSGWGFATILCLMWRRAVEIGTCW*	CCTTTCTCTGTGCTGACTGCGGGGGGATGGGGATCTGGGTGGGGGTTCGCTACGATTCTCTGCTTGATGTGGAGACTGGGCGGTTGAGATCGGAACTTGTTGGTGATAGATCTGCCTGTATGCTTCGTGTTGCATTGAATGGTGCTTAGATCTGTGGGATTGGTGATGGGATAGTCGGATTTGTCCATGTATCTGATACTTTCCCGGGTTGATTGCCATGGATTTGCGGGATATGGCATTA	CCTTTCTCTGTGCTGACTGCGGGGGGATGGGGATCTGGGTGGGGGTTCGCTACGATTCTCTGCTTGATGTGGAGACGGGCGGTTGAGATCGGAACTTGTTGGTGATAGATCTGCCTGTATGCTTCGTGTTGCATTGAATGGTGCTTAGATCTGTGGGATTGGTGATGGGATAGTCGGATTTGTCCATGTATTTGATACTTTCCCGGGTTGATTGCCATGGATTTGCGGGATATGGCATTA
CCTTTCTCTGTGCTGACTGCGGGGGGATGGGGATCTGGGTGGGGGTTCGCTACGATTCTCTGCTTGATGTGGAGACTgGGCGGTTGAGATCGGAACTTGTTGGTGATAGATCTGCCTGTATGCTTCGTGTTGCATTGAATGGTGCTTAGATCTGTGGGATTGGTGATGGGATAGTCGGATTTGTCCATGTATTTGATACTTTCCCGGGTTGATTGCCATGGATTTGTGGGATATGGCATTA	8	32	Insertion	0.01	1	PFSVLTAGGWGSGWGFATILCLMWRLGG*	PFSVLTAGGWGSGWGFATILCLMWRRAVEIGTCW*	CCTTTCTCTGTGCTGACTGCGGGGGGATGGGGATCTGGGTGGGGGTTCGCTACGATTCTCTGCTTGATGTGGAGACTGGGCGGTTGAGATCGGAACTTGTTGGTGATAGATCTGCCTGTATGCTTCGTGTTGCATTGAATGGTGCTTAGATCTGTGGGATTGGTGATGGGATAGTCGGATTTGTCCATGTATTTGATACTTTCCCGGGTTGATTGCCATGGATTTGTGGGATATGGCATTA	CCTTTCTCTGTGCTGACTGCGGGGGGATGGGGATCTGGGTGGGGGTTCGCTACGATTCTCTGCTTGATGTGGAGACGGGCGGTTGAGATCGGAACTTGTTGGTGATAGATCTGCCTGTATGCTTCGTGTTGCATTGAATGGTGCTTAGATCTGTGGGATTGGTGATGGGATAGTCGGATTTGTCCATGTATTTGATACTTTCCCGGGTTGATTGCCATGGATTTGCGGGATATGGCATTA
CCTTTCTCTGTGCTGACTGCGGGGGGATGGGGATCTGGGTGGGGGTTCGCTACGATTCTCTGCTTGATGTGGAGgCCGGGCGGTTGAGATCGGAACTTGTTGGTGATAGATCTGCCTGTATGCTTCGTGTTGCATTGAATGGTGCTTAGATCTGTGGGATTGGTGATGGGATAGTCGGATTTGTCCATGTATTTGATACTTTCCCGGGTTGATTGCCATGGATTTGCGGGATATGGCATTA	8	33	Insertion	0.01	1	PFSVLTAGGWGSGWGFATILCLMWRPGG*	PFSVLTAGGWGSGWGFATILCLMWRRAVEIGTCW*	CCTTTCTCTGTGCTGACTGCGGGGGGATGGGGATCTGGGTGGGGGTTCGCTACGATTCTCTGCTTGATGTGGAGGCCGGGCGGTTGAGATCGGAACTTGTTGGTGATAGATCTGCCTGTATGCTTCGTGTTGCATTGAATGGTGCTTAGATCTGTGGGATTGGTGATGGGATAGTCGGATTTGTCCATGTATTTGATACTTTCCCGGGTTGATTGCCATGGATTTGCGGGATATGGCATTA	CCTTTCTCTGTGCTGACTGCGGGGGGATGGGGATCTGGGTGGGGGTTCGCTACGATTCTCTGCTTGATGTGGAGACGGGCGGTTGAGATCGGAACTTGTTGGTGATAGATCTGCCTGTATGCTTCGTGTTGCATTGAATGGTGCTTAGATCTGTGGGATTGGTGATGGGATAGTCGGATTTGTCCATGTATTTGATACTTTCCCGGGTTGATTGCCATGGATTTGCGGGATATGGCATTA
CCTTTCTCTGTGCTGACTGCGGGGGGATGGGGATCTGGGTGGGGGTTCGCTACGGTTCTCTGCTTGATGTGG---CGGGCGGTTGAGATCGGAACTTGTTGGTGATAGATCTGCCTGTATGCTTCGTGTTGCATTGAATGGTGCTTAGATCTGTGGGATTGGTGATGGGATAGTCGGATTTGTCCATGTATTTGATACTTTCCCGGGTTGATTGCCATGGATTTGCGGGATATGGCATTA	8	30	Deletion	0.01	-3	PFSVLTAGGWGSGWGFATVLCLMWRAVEIGTCW*	PFSVLTAGGWGSGWGFATILCLMWRRAVEIGTCW*	CCTTTCTCTGTGCTGACTGCGGGGGGATGGGGATCTGGGTGGGGGTTCGCTACGGTTCTCTGCTTGATGTGG---CGGGCGGTTGAGATCGGAACTTGTTGGTGATAGATCTGCCTGTATGCTTCGTGTTGCATTGAATGGTGCTTAGATCTGTGGGATTGGTGATGGGATAGTCGGATTTGTCCATGTATTTGATACTTTCCCGGGTTGATTGCCATGGATTTGCGGGATATGGCATTA	CCTTTCTCTGTGCTGACTGCGGGGGGATGGGGATCTGGGTGGGGGTTCGCTACGATTCTCTGCTTGATGTGGAGACGGGCGGTTGAGATCGGAACTTGTTGGTGATAGATCTGCCTGTATGCTTCGTGTTGCATTGAATGGTGCTTAGATCTGTGGGATTGGTGATGGGATAGTCGGATTTGTCCATGTATTTGATACTTTCCCGGGTTGATTGCCATGGATTTGCGGGATATGGCATTA
CCTTTCTCTGTGCTGACTGCGGGGGGATGGGGATCTGGGTGGGGGTTCGCTGCGATTCTCTGCTTGATGTGG---CGGGCGGTTGAGATCGGAACTTGTTGGTGATAGATCTGCCTGTATGCTTCGTGTTGCATTGAATGGTGCTTAGATCTGTGGGATTGGTGATGGGATAGTCGGATTTGTCCATGTATTTGATACTTTCCCGGGTTGATTGCCATGGATTTGCGGGATATGGCATTA	8	30	Deletion	0.01	-3	PFSVLTAGGWGSGWGFAAILCLMWRAVEIGTCW*	PFSVLTAGGWGSGWGFATILCLMWRRAVEIGTCW*	CCTTTCTCTGTGCTGACTGCGGGGGGATGGGGATCTGGGTGGGGGTTCGCTGCGATTCTCTGCTTGATGTGG---CGGGCGGTTGAGATCGGAACTTGTTGGTGATAGATCTGCCTGTATGCTTCGTGTTGCATTGAATGGTGCTTAGATCTGTGGGATTGGTGATGGGATAGTCGGATTTGTCCATGTATTTGATACTTTCCCGGGTTGATTGCCATGGATTTGCGGGATATGGCATTA	CCTTTCTCTGTGCTGACTGCGGGGGGATGGGGATCTGGGTGGGGGTTCGCTACGATTCTCTGCTTGATGTGGAGACGGGCGGTTGAGATCGGAACTTGTTGGTGATAGATCTGCCTGTATGCTTCGTGTTGCATTGAATGGTGCTTAGATCTGTGGGATTGGTGATGGGATAGTCGGATTTGTCCATGTATTTGATACTTTCCCGGGTTGATTGCCATGGATTTGCGGGATATGGCATTA
CCTTTCTCTGTGCTGACTGCGGGGGGATGGGGGTCTGGGTGGGGGTTCGCTACGATTCTCTGCTTGATGTGGAGACcGGGCGGTTGAGATCGGAACTTGTTGGTGATAGATCTGCCTGTATGCTTCGTGTTGCATTGAATGGTGCTTAGATCTGTGGGATTGGTGATGGGATAGTCGGATTTGTCCATGTATTTGATACTTTCCCGGGTTGATTGCCATGGATTTGCGGGATATGGCATTA	8	33	Insertion	0.01	1	PFSVLTAGGWGSGWGFATILCLMWRPGG*	PFSVLTAGGWGSGWGFATILCLMWRRAVEIGTCW*	CCTTTCTCTGTGCTGACTGCGGGGGGATGGGGGTCTGGGTGGGGGTTCGCTACGATTCTCTGCTTGATGTGGAGACCGGGCGGTTGAGATCGGAACTTGTTGGTGATAGATCTGCCTGTATGCTTCGTGTTGCATTGAATGGTGCTTAGATCTGTGGGATTGGTGATGGGATAGTCGGATTTGTCCATGTATTTGATACTTTCCCGGGTTGATTGCCATGGATTTGCGGGATATGGCATTA	CCTTTCTCTGTGCTGACTGCGGGGGGATGGGGATCTGGGTGGGGGTTCGCTACGATTCTCTGCTTGATGTGGAGACGGGCGGTTGAGATCGGAACTTGTTGGTGATAGATCTGCCTGTATGCTTCGTGTTGCATTGAATGGTGCTTAGATCTGTGGGATTGGTGATGGGATAGTCGGATTTGTCCATGTATTTGATACTTTCCCGGGTTGATTGCCATGGATTTGCGGGATATGGCATTA
CCTTTCTCTGTGCTGACTGTGGGGGGATGGGGATCTGGGTGGGGGTTCGCTACGATTCTCTGCTTGATGTGGAGACGGGCGGTTGAGATCGGAACTTGTTGGTGATAGATCTGCCTGTATGCTTCGTGTTGCATTGAATGGTGCTTAGATCTGTGGGATTGGTGATGGGATAGTCGGATTTGTCCATGTATTTGATACTTTCCCGGGTTGATTGCCATGGATTTGCGGGATATGGCATTA	8	32	1 Base Change	0.01	0	PFSVLTVGGWGSGWGFATILCLMWRRAVEIGTCW*	PFSVLTAGGWGSGWGFATILCLMWRRAVEIGTCW*	CCTTTCTCTGTGCTGACTGTGGGGGGATGGGGATCTGGGTGGGGGTTCGCTACGATTCTCTGCTTGATGTGGAGACGGGCGGTTGAGATCGGAACTTGTTGGTGATAGATCTGCCTGTATGCTTCGTGTTGCATTGAATGGTGCTTAGATCTGTGGGATTGGTGATGGGATAGTCGGATTTGTCCATGTATTTGATACTTTCCCGGGTTGATTGCCATGGATTTGCGGGATATGGCATTA	CCTTTCTCTGTGCTGACTGCGGGGGGATGGGGATCTGGGTGGGGGTTCGCTACGATTCTCTGCTTGATGTGGAGACGGGCGGTTGAGATCGGAACTTGTTGGTGATAGATCTGCCTGTATGCTTCGTGTTGCATTGAATGGTGCTTAGATCTGTGGGATTGGTGATGGGATAGTCGGATTTGTCCATGTATTTGATACTTTCCCGGGTTGATTGCCATGGATTTGCGGGATATGGCATTA
CCCTTCTCTGTGCTGACTGCGGGGGGATGGGGATCTGGGTGGGGGTTCGCTACGATTCTCTGCTTGATGTGGAGACGGGCGGTTGAGATCGGAACTTGTTGGTGATAGATCTGCCTGTATGCTTCGTGTTGCATTGAATGGTGCTTAGATCTGTGGGATTGGTGATGGGATAGTCGGATTTGTCCATGTATTTGATACTTTCCCGGGTTGATTGCCATGGATTTGCGGGATATGGCATTA	7	32	1 Base Change	0.01	0	PFSVLTAGGWGSGWGFATILCLMWRRAVEIGTCW*	PFSVLTAGGWGSGWGFATILCLMWRRAVEIGTCW*	CCCTTCTCTGTGCTGACTGCGGGGGGATGGGGATCTGGGTGGGGGTTCGCTACGATTCTCTGCTTGATGTGGAGACGGGCGGTTGAGATCGGAACTTGTTGGTGATAGATCTGCCTGTATGCTTCGTGTTGCATTGAATGGTGCTTAGATCTGTGGGATTGGTGATGGGATAGTCGGATTTGTCCATGTATTTGATACTTTCCCGGGTTGATTGCCATGGATTTGCGGGATATGGCATTA	CCTTTCTCTGTGCTGACTGCGGGGGGATGGGGATCTGGGTGGGGGTTCGCTACGATTCTCTGCTTGATGTGGAGACGGGCGGTTGAGATCGGAACTTGTTGGTGATAGATCTGCCTGTATGCTTCGTGTTGCATTGAATGGTGCTTAGATCTGTGGGATTGGTGATGGGATAGTCGGATTTGTCCATGTATTTGATACTTTCCCGGGTTGATTGCCATGGATTTGCGGGATATGGCATTA
CCTTCCTCTGTGCTGACTGCGGGGGGATGGGGATCTGGGTGGGGGTTCGCTACGATTCTCTGCTTGATGTGGAGACGGGCGGTTGAGATCGGAACTTGTTGGTGATAGATCTGCCTGTATGCTTCGTGTTGCATTGAATGGTGCTTAGATCTGTGGGATTGGTGATGGGATAGTCGGATTTGTCCATGTATTTGATACTTTCCCGGGTTGATTGCCATGGATTTGCGGGATATGGCATTA	7	33	1 Base Change	0.01	0	PSSVLTAGGWGSGWGFATILCLMWRRAVEIGTCW*	PFSVLTAGGWGSGWGFATILCLMWRRAVEIGTCW*	CCTTCCTCTGTGCTGACTGCGGGGGGATGGGGATCTGGGTGGGGGTTCGCTACGATTCTCTGCTTGATGTGGAGACGGGCGGTTGAGATCGGAACTTGTTGGTGATAGATCTGCCTGTATGCTTCGTGTTGCATTGAATGGTGCTTAGATCTGTGGGATTGGTGATGGGATAGTCGGATTTGTCCATGTATTTGATACTTTCCCGGGTTGATTGCCATGGATTTGCGGGATATGGCATTA	CCTTTCTCTGTGCTGACTGCGGGGGGATGGGGATCTGGGTGGGGGTTCGCTACGATTCTCTGCTTGATGTGGAGACGGGCGGTTGAGATCGGAACTTGTTGGTGATAGATCTGCCTGTATGCTTCGTGTTGCATTGAATGGTGCTTAGATCTGTGGGATTGGTGATGGGATAGTCGGATTTGTCCATGTATTTGATACTTTCCCGGGTTGATTGCCATGGATTTGCGGGATATGGCATTA
CCTTTCCCTGTGCTGACTGCGGGGGGATGGGGATCTGGGTGGGGGTTCGCTACGATTCTCTGCTTGATGTGGAGACTgGGCGGTTGAGATCGGAACTTGTTGGTGATAGATCTGCCTGTATGCTTCGTGTTGCATTGAATGGTGCTTAGATCTGTGGGATTGGTGATGGGATAGTCGGATTTGTCCATGTATTTGATACTTTCCCGGGTTGATTGCCATGGATTTGCGGGATATGGCATTA	7	32	Insertion	0.01	1	PFPVLTAGGWGSGWGFATILCLMWRLGG*	PFSVLTAGGWGSGWGFATILCLMWRRAVEIGTCW*	CCTTTCCCTGTGCTGACTGCGGGGGGATGGGGATCTGGGTGGGGGTTCGCTACGATTCTCTGCTTGATGTGGAGACTGGGCGGTTGAGATCGGAACTTGTTGGTGATAGATCTGCCTGTATGCTTCGTGTTGCATTGAATGGTGCTTAGATCTGTGGGATTGGTGATGGGATAGTCGGATTTGTCCATGTATTTGATACTTTCCCGGGTTGATTGCCATGGATTTGCGGGATATGGCATTA	CCTTTCTCTGTGCTGACTGCGGGGGGATGGGGATCTGGGTGGGGGTTCGCTACGATTCTCTGCTTGATGTGGAGACGGGCGGTTGAGATCGGAACTTGTTGGTGATAGATCTGCCTGTATGCTTCGTGTTGCATTGAATGGTGCTTAGATCTGTGGGATTGGTGATGGGATAGTCGGATTTGTCCATGTATTTGATACTTTCCCGGGTTGATTGCCATGGATTTGCGGGATATGGCATTA
CCTTTCTCTATGCTGACTGCGGGGGGATGGGGATCTGGGTGGGGGTTCGCTACGATTCTCTGCTTGATGTGGAGACTgGGCGGTTGAGATCGGAACTTGTTGGTGATAGATCTGCCTGTATGCTTCGTGTTGCATTGAATGGTGCTTAGATCTGTGGGATTGGTGATGGGATAGTCGGATTTGTCCATGTATTTGATACTTTCCCGGGTTGATTGCCATGGATTTGCGGGATATGGCATTA	7	33	Insertion	0.01	1	PFSMLTAGGWGSGWGFATILCLMWRLGG*	PFSVLTAGGWGSGWGFATILCLMWRRAVEIGTCW*	CCTTTCTCTATGCTGACTGCGGGGGGATGGGGATCTGGGTGGGGGTTCGCTACGATTCTCTGCTTGATGTGGAGACTGGGCGGTTGAGATCGGAACTTGTTGGTGATAGATCTGCCTGTATGCTTCGTGTTGCATTGAATGGTGCTTAGATCTGTGGGATTGGTGATGGGATAGTCGGATTTGTCCATGTATTTGATACTTTCCCGGGTTGATTGCCATGGATTTGCGGGATATGGCATTA	CCTTTCTCTGTGCTGACTGCGGGGGGATGGGGATCTGGGTGGGGGTTCGCTACGATTCTCTGCTTGATGTGGAGACGGGCGGTTGAGATCGGAACTTGTTGGTGATAGATCTGCCTGTATGCTTCGTGTTGCATTGAATGGTGCTTAGATCTGTGGGATTGGTGATGGGATAGTCGGATTTGTCCATGTATTTGATACTTTCCCGGGTTGATTGCCATGGATTTGCGGGATATGGCATTA
CCTTTCTCTG-GCTGACTGCGGGGGGATGGGGATCTGGGTGGGGGTTCGCTACGATTCTCTGCTTGATGTGGAGACTgGGCGGTTGAGATCGGAACTTGTTGGTGATAGATCTGCCTGTATGCTTCGTGTTGCATTGAATGGTGCTTAGATCTGTGGGATTGGTGATGGGATAGTCGGATTTGTCCATGTATTTGATACTTTCCCGGGTTGATTGCCATGGATTTGCGGGATATGGCATTA	7	32	Insertion and Deletion	0.01	0	PFSG*	PFSVLTAGGWGSGWGFATILCLMWRRAVEIGTCW*	CCTTTCTCTG-GCTGACTGCGGGGGGATGGGGATCTGGGTGGGGGTTCGCTACGATTCTCTGCTTGATGTGGAGACTGGGCGGTTGAGATCGGAACTTGTTGGTGATAGATCTGCCTGTATGCTTCGTGTTGCATTGAATGGTGCTTAGATCTGTGGGATTGGTGATGGGATAGTCGGATTTGTCCATGTATTTGATACTTTCCCGGGTTGATTGCCATGGATTTGCGGGATATGGCATTA	CCTTTCTCTGTGCTGACTGCGGGGGGATGGGGATCTGGGTGGGGGTTCGCTACGATTCTCTGCTTGATGTGGAGACGGGCGGTTGAGATCGGAACTTGTTGGTGATAGATCTGCCTGTATGCTTCGTGTTGCATTGAATGGTGCTTAGATCTGTGGGATTGGTGATGGGATAGTCGGATTTGTCCATGTATTTGATACTTTCCCGGGTTGATTGCCATGGATTTGCGGGATATGGCATTA
CCTTTCTCTGTGCTGACTACGGGGGGATGGGGATCTGGGTGGGGGTTCGCTACGATTCTCTGCTTGATGTGG---CGGGCGGTTGAGATCGGAACTTGTTGGTGATAGATCTGCCTGTATGCTTCGTGTTGCATTGAATGGTGCTTAGATCTGTGGGATTGGTGATGGGATAGTCGGATTTGTCCATGTATTTGATACTTTCCCGGGTTGATTGCCATGGATTTGCGGGATATGGCATTA	7	27	Deletion	0.01	-3	PFSVLTTGGWGSGWGFATILCLMWRAVEIGTCW*	PFSVLTAGGWGSGWGFATILCLMWRRAVEIGTCW*	CCTTTCTCTGTGCTGACTACGGGGGGATGGGGATCTGGGTGGGGGTTCGCTACGATTCTCTGCTTGATGTGG---CGGGCGGTTGAGATCGGAACTTGTTGGTGATAGATCTGCCTGTATGCTTCGTGTTGCATTGAATGGTGCTTAGATCTGTGGGATTGGTGATGGGATAGTCGGATTTGTCCATGTATTTGATACTTTCCCGGGTTGATTGCCATGGATTTGCGGGATATGGCATTA	CCTTTCTCTGTGCTGACTGCGGGGGGATGGGGATCTGGGTGGGGGTTCGCTACGATTCTCTGCTTGATGTGGAGACGGGCGGTTGAGATCGGAACTTGTTGGTGATAGATCTGCCTGTATGCTTCGTGTTGCATTGAATGGTGCTTAGATCTGTGGGATTGGTGATGGGATAGTCGGATTTGTCCATGTATTTGATACTTTCCCGGGTTGATTGCCATGGATTTGCGGGATATGGCATTA
CCTTTCTCTGTGCTGACTGCGGGGGGATGGGGATCCGGGTGGGGGTTCGCTACGATTCTCTGCTTGATGTGG---CGGGCGGTTGAGATCGGAACTTGTTGGTGATAGATCTGCCTGTATGCTTCGTGTTGCATTGAATGGTGCTTAGATCTGTGGGATTGGTGATGGGATAGTCGGATTTGTCCATGTATTTGATACTTTCCCGGGTTGATTGCCATGGATTTGCGGGATATGGCATTA	7	28	Deletion	0.01	-3	PFSVLTAGGWGSGWGFATILCLMWRAVEIGTCW*	PFSVLTAGGWGSGWGFATILCLMWRRAVEIGTCW*	CCTTTCTCTGTGCTGACTGCGGGGGGATGGGGATCCGGGTGGGGGTTCGCTACGATTCTCTGCTTGATGTGG---CGGGCGGTTGAGATCGGAACTTGTTGGTGATAGATCTGCCTGTATGCTTCGTGTTGCATTGAATGGTGCTTAGATCTGTGGGATTGGTGATGGGATAGTCGGATTTGTCCATGTATTTGATACTTTCCCGGGTTGATTGCCATGGATTTGCGGGATATGGCATTA	CCTTTCTCTGTGCTGACTGCGGGGGGATGGGGATCTGGGTGGGGGTTCGCTACGATTCTCTGCTTGATGTGGAGACGGGCGGTTGAGATCGGAACTTGTTGGTGATAGATCTGCCTGTATGCTTCGTGTTGCATTGAATGGTGCTTAGATCTGTGGGATTGGTGATGGGATAGTCGGATTTGTCCATGTATTTGATACTTTCCCGGGTTGATTGCCATGGATTTGCGGGATATGGCATTA
CCTTTCTCTGTGCTGACTGCGGGGGGATGGGGATCTGGGT-GGGGTTCGCTACGATTCTCTGCTTGATGTGG---CGGGCGGTTGAGATCGGAACTTGTTGGTGATAGATCTGCCTGTATGCTTCGTGTTGCATTGAATGGTGCTTAGATCTGTGGGATTGGTGATGGGATAGTCGGATTTGTCCATGTATTTGATACTTTCCCGGGTTGATTGCCATGGATTTGCGGGATATGGCATTA	7	32	Deletion	0.01	-4	PFSVLTAGGWGSGWGSLRFSA*	PFSVLTAGGWGSGWGFATILCLMWRRAVEIGTCW*	CCTTTCTCTGTGCTGACTGCGGGGGGATGGGGATCTGGGT-GGGGTTCGCTACGATTCTCTGCTTGATGTGG---CGGGCGGTTGAGATCGGAACTTGTTGGTGATAGATCTGCCTGTATGCTTCGTGTTGCATTGAATGGTGCTTAGATCTGTGGGATTGGTGATGGGATAGTCGGATTTGTCCATGTATTTGATACTTTCCCGGGTTGATTGCCATGGATTTGCGGGATATGGCATTA	CCTTTCTCTGTGCTGACTGCGGGGGGATGGGGATCTGGGTGGGGGTTCGCTACGATTCTCTGCTTGATGTGGAGACGGGCGGTTGAGATCGGAACTTGTTGGTGATAGATCTGCCTGTATGCTTCGTGTTGCATTGAATGGTGCTTAGATCTGTGGGATTGGTGATGGGATAGTCGGATTTGTCCATGTATTTGATACTTTCCCGGGTTGATTGCCATGGATTTGCGGGATATGGCATTA
CCTTTCTCTGTGCTGACTGCGGGGGGATGGGGATCTGGGTAGGGGTTCGCTACGATTCTCTGCTTGATGTGGAGACTgGGCGGTTGAGATCGGAACTTGTTGGTGATAGATCTGCCTGTATGCTTCGTGTTGCATTGAATGGTGCTTAGATCTGTGGGATTGGTGATGGGATAGTCGGATTTGTCCATGTATTTGATACTTTCCCGGGTTGATTGCCATGGATTTGCGGGATATGGCATTA	7	34	Insertion	0.01	1	PFSVLTAGGWGSG*	PFSVLTAGGWGSGWGFATILCLMWRRAVEIGTCW*	CCTTTCTCTGTGCTGACTGCGGGGGGATGGGGATCTGGGTAGGGGTTCGCTACGATTCTCTGCTTGATGTGGAGACTGGGCGGTTGAGATCGGAACTTGTTGGTGATAGATCTGCCTGTATGCTTCGTGTTGCATTGAATGGTGCTTAGATCTGTGGGATTGGTGATGGGATAGTCGGATTTGTCCATGTATTTGATACTTTCCCGGGTTGATTGCCATGGATTTGCGGGATATGGCATTA	CCTTTCTCTGTGCTGACTGCGGGGGGATGGGGATCTGGGTGGGGGTTCGCTACGATTCTCTGCTTGATGTGGAGACGGGCGGTTGAGATCGGAACTTGTTGGTGATAGATCTGCCTGTATGCTTCGTGTTGCATTGAATGGTGCTTAGATCTGTGGGATTGGTGATGGGATAGTCGGATTTGTCCATGTATTTGATACTTTCCCGGGTTGATTGCCATGGATTTGCGGGATATGGCATTA
CCTTTCTCTGTGCTGACTGCGGGGGGATGGGGATCTGGGTGAGGGTTCGCTACGATTCTCTGCTTGATGTGGAGACcGGGCGGTTGAGATCGGAACTTGTTGGTGATAGATCTGCCTGTATGCTTCGTGTTGCATTGAATGGTGCTTAGATCTGTGGGATTGGTGATGGGATAGTCGGATTTGTCCATGTATTTGATACTTTCCCGGGTTGATTGCCATGGATTTGCGGGATATGGCATTA	7	31	Insertion	0.01	1	PFSVLTAGGWGSG*	PFSVLTAGGWGSGWGFATILCLMWRRAVEIGTCW*	CCTTTCTCTGTGCTGACTGCGGGGGGATGGGGATCTGGGTGAGGGTTCGCTACGATTCTCTGCTTGATGTGGAGACCGGGCGGTTGAGATCGGAACTTGTTGGTGATAGATCTGCCTGTATGCTTCGTGTTGCATTGAATGGTGCTTAGATCTGTGGGATTGGTGATGGGATAGTCGGATTTGTCCATGTATTTGATACTTTCCCGGGTTGATTGCCATGGATTTGCGGGATATGGCATTA	CCTTTCTCTGTGCTGACTGCGGGGGGATGGGGATCTGGGTGGGGGTTCGCTACGATTCTCTGCTTGATGTGGAGACGGGCGGTTGAGATCGGAACTTGTTGGTGATAGATCTGCCTGTATGCTTCGTGTTGCATTGAATGGTGCTTAGATCTGTGGGATTGGTGATGGGATAGTCGGATTTGTCCATGTATTTGATACTTTCCCGGGTTGATTGCCATGGATTTGCGGGATATGGCATTA
CCTTTCTCTGTGCTGACTGCGGGGGGATGGGGATCTGGGTGGGAGTTCGCTACGATTCTCTGCTTGATGTGGAGACGGGCGGTTGAGATCGGAACTTGTTGGTGATAGATCTGCCTGTATGCTTCGTGTTGCATTGAATGGTGCTTAGATCTGTGGGATTGGTGATGGGATAGTCGGATTTGTCCATGTATTTGATACTTTCCCGGGTTGATTGCCATGGATTTGCGGGATATGGCATTA	7	34	1 Base Change	0.01	0	PFSVLTAGGWGSGWEFATILCLMWRRAVEIGTCW*	PFSVLTAGGWGSGWGFATILCLMWRRAVEIGTCW*	CCTTTCTCTGTGCTGACTGCGGGGGGATGGGGATCTGGGTGGGAGTTCGCTACGATTCTCTGCTTGATGTGGAGACGGGCGGTTGAGATCGGAACTTGTTGGTGATAGATCTGCCTGTATGCTTCGTGTTGCATTGAATGGTGCTTAGATCTGTGGGATTGGTGATGGGATAGTCGGATTTGTCCATGTATTTGATACTTTCCCGGGTTGATTGCCATGGATTTGCGGGATATGGCATTA	CCTTTCTCTGTGCTGACTGCGGGGGGATGGGGATCTGGGTGGGGGTTCGCTACGATTCTCTGCTTGATGTGGAGACGGGCGGTTGAGATCGGAACTTGTTGGTGATAGATCTGCCTGTATGCTTCGTGTTGCATTGAATGGTGCTTAGATCTGTGGGATTGGTGATGGGATAGTCGGATTTGTCCATGTATTTGATACTTTCCCGGGTTGATTGCCATGGATTTGCGGGATATGGCATTA
CCTTTCTCTGTGCTGACTGCGGGGGGATGGGGATCTGGGTGGGGGT------------------------------------------TCGGAACTTGTTGGTGATAGATCTGCCTGTATGCTTCGTGTTGCATTGAATGGTGCTTAGATCTGTGGGATTGGTGATGGGATAGTCGGATTTGTCCATGTATTTGATACTTTCCCGGGTTGATTGCCATGGATTTGCGGGATATGGCATTA	7	33	Deletion	0.01	-42	PFSVLTAGGWGSGWGFGTCW*	PFSVLTAGGWGSGWGFATILCLMWRRAVEIGTCW*	CCTTTCTCTGTGCTGACTGCGGGGGGATGGGGATCTGGGTGGGGGT------------------------------------------TCGGAACTTGTTGGTGATAGATCTGCCTGTATGCTTCGTGTTGCATTGAATGGTGCTTAGATCTGTGGGATTGGTGATGGGATAGTCGGATTTGTCCATGTATTTGATACTTTCCCGGGTTGATTGCCATGGATTTGCGGGATATGGCATTA	CCTTTCTCTGTGCTGACTGCGGGGGGATGGGGATCTGGGTGGGGGTTCGCTACGATTCTCTGCTTGATGTGGAGACGGGCGGTTGAGATCGGAACTTGTTGGTGATAGATCTGCCTGTATGCTTCGTGTTGCATTGAATGGTGCTTAGATCTGTGGGATTGGTGATGGGATAGTCGGATTTGTCCATGTATTTGATACTTTCCCGGGTTGATTGCCATGGATTTGCGGGATATGGCATTA
CCTTTCTCTGTGCTGACTGCGGGGGGATGGGGATCTGGGTGGGGGTCCGCTACGATTCTCTGCTTGATGTGGA---GGGCGGTTGAGATCGGAACTTGTTGGTGATAGATCTGCCTGTATGCTTCGTGTTGCATTGAATGGTGCTTAGATCTGTGGGATTGGTGATGGGATAGTCGGATTTGTCCATGTATTTGATACTTTCCCGGGTTGATTGCCATGGATTTGCGGGATATGGCATTA	7	33	Deletion	0.01	-3	PFSVLTAGGWGSGWGSATILCLMWRAVEIGTCW*	PFSVLTAGGWGSGWGFATILCLMWRRAVEIGTCW*	CCTTTCTCTGTGCTGACTGCGGGGGGATGGGGATCTGGGTGGGGGTCCGCTACGATTCTCTGCTTGATGTGGA---GGGCGGTTGAGATCGGAACTTGTTGGTGATAGATCTGCCTGTATGCTTCGTGTTGCATTGAATGGTGCTTAGATCTGTGGGATTGGTGATGGGATAGTCGGATTTGTCCATGTATTTGATACTTTCCCGGGTTGATTGCCATGGATTTGCGGGATATGGCATTA	CCTTTCTCTGTGCTGACTGCGGGGGGATGGGGATCTGGGTGGGGGTTCGCTACGATTCTCTGCTTGATGTGGAGACGGGCGGTTGAGATCGGAACTTGTTGGTGATAGATCTGCCTGTATGCTTCGTGTTGCATTGAATGGTGCTTAGATCTGTGGGATTGGTGATGGGATAGTCGGATTTGTCCATGTATTTGATACTTTCCCGGGTTGATTGCCATGGATTTGCGGGATATGGCATTA
CCTTTCTCTGTGCTGACTGCGGGGGGATGGGGATCTGGGTGGGGGTTCGCCACGATTCTCTGCTTGATGTGG----GGGCGGTTGAGATCGGAACTTGTTGGTGATAGATCTGCCTGTATGCTTCGTGTTGCATTGAATGGTGCTTAGATCTGTGGGATTGGTGATGGGATAGTCGGATTTGTCCATGTATTTGATACTTTCCCGGGTTGATTGCCATGGATTTGCGGGATATGGCATTA	7	33	Deletion	0.01	-4	PFSVLTAGGWGSGWGFATILCLMWGRLRSELVGDRSACMLRVALNGA*	PFSVLTAGGWGSGWGFATILCLMWRRAVEIGTCW*	CCTTTCTCTGTGCTGACTGCGGGGGGATGGGGATCTGGGTGGGGGTTCGCCACGATTCTCTGCTTGATGTGG----GGGCGGTTGAGATCGGAACTTGTTGGTGATAGATCTGCCTGTATGCTTCGTGTTGCATTGAATGGTGCTTAGATCTGTGGGATTGGTGATGGGATAGTCGGATTTGTCCATGTATTTGATACTTTCCCGGGTTGATTGCCATGGATTTGCGGGATATGGCATTA	CCTTTCTCTGTGCTGACTGCGGGGGGATGGGGATCTGGGTGGGGGTTCGCTACGATTCTCTGCTTGATGTGGAGACGGGCGGTTGAGATCGGAACTTGTTGGTGATAGATCTGCCTGTATGCTTCGTGTTGCATTGAATGGTGCTTAGATCTGTGGGATTGGTGATGGGATAGTCGGATTTGTCCATGTATTTGATACTTTCCCGGGTTGATTGCCATGGATTTGCGGGATATGGCATTA
CCTTTCTCTGTGCTGACTGCGGGGGGATGGGGATCTGGGTGGGGGTTCGCTACAATTCTCTGCTTGATGTGGAGACcGGGCGGTTGAGATCGGAACTTGTTGGTGATAGATCTGCCTGTATGCTTCGTGTTGCATTGAATGGTGCTTAGATCTGTGGGATTGGTGATGGGATAGTCGGATTTGTCCATGTATTTGATACTTTCCCGGGTTGATTGCCATGGATTTGCGGGATATGGCATTA	7	33	Insertion	0.01	1	PFSVLTAGGWGSGWGFATILCLMWRPGG*	PFSVLTAGGWGSGWGFATILCLMWRRAVEIGTCW*	CCTTTCTCTGTGCTGACTGCGGGGGGATGGGGATCTGGGTGGGGGTTCGCTACAATTCTCTGCTTGATGTGGAGACCGGGCGGTTGAGATCGGAACTTGTTGGTGATAGATCTGCCTGTATGCTTCGTGTTGCATTGAATGGTGCTTAGATCTGTGGGATTGGTGATGGGATAGTCGGATTTGTCCATGTATTTGATACTTTCCCGGGTTGATTGCCATGGATTTGCGGGATATGGCATTA	CCTTTCTCTGTGCTGACTGCGGGGGGATGGGGATCTGGGTGGGGGTTCGCTACGATTCTCTGCTTGATGTGGAGACGGGCGGTTGAGATCGGAACTTGTTGGTGATAGATCTGCCTGTATGCTTCGTGTTGCATTGAATGGTGCTTAGATCTGTGGGATTGGTGATGGGATAGTCGGATTTGTCCATGTATTTGATACTTTCCCGGGTTGATTGCCATGGATTTGCGGGATATGGCATTA
CCTTTCTCTGTGCTGACTGCGGGGGGATGGGGATCTGGGTGGGGGTTCGCTACGACTCTCTGCTTGATGTGGA---GGGCGGTTGAGATCGGAACTTGTTGGTGATAGATCTGCCTGTATGCTTCGTGTTGCATTGAATGGTGCTTAGATCTGTGGGATTGGTGATGGGATAGTCGGATTTGTCCATGTATTTGATACTTTCCCGGGTTGATTGCCATGGATTTGCGGGATATGGCATTA	7	32	Deletion	0.01	-3	PFSVLTAGGWGSGWGFATTLCLMWRAVEIGTCW*	PFSVLTAGGWGSGWGFATILCLMWRRAVEIGTCW*	CCTTTCTCTGTGCTGACTGCGGGGGGATGGGGATCTGGGTGGGGGTTCGCTACGACTCTCTGCTTGATGTGGA---GGGCGGTTGAGATCGGAACTTGTTGGTGATAGATCTGCCTGTATGCTTCGTGTTGCATTGAATGGTGCTTAGATCTGTGGGATTGGTGATGGGATAGTCGGATTTGTCCATGTATTTGATACTTTCCCGGGTTGATTGCCATGGATTTGCGGGATATGGCATTA	CCTTTCTCTGTGCTGACTGCGGGGGGATGGGGATCTGGGTGGGGGTTCGCTACGATTCTCTGCTTGATGTGGAGACGGGCGGTTGAGATCGGAACTTGTTGGTGATAGATCTGCCTGTATGCTTCGTGTTGCATTGAATGGTGCTTAGATCTGTGGGATTGGTGATGGGATAGTCGGATTTGTCCATGTATTTGATACTTTCCCGGGTTGATTGCCATGGATTTGCGGGATATGGCATTA
CCTTTCTCTGTGCTGACTGCGGGGGGATGGGGATCTGGGTGGGGGTTCGCTACGATCCTCTGCTTGATGTGG---CGGGCGGTTGAGATCGGAACTTGTTGGTGATAGATCTGCCTGTATGCTTCGTGTTGCATTGAATGGTGCTTAGATCTGTGGGATTGGTGATGGGATAGTCGGATTTGTCCATGTATTTGATACTTTCCCGGGTTGATTGCCATGGATTTGCGGGATATGGCATTA	7	27	Deletion	0.01	-3	PFSVLTAGGWGSGWGFATILCLMWRAVEIGTCW*	PFSVLTAGGWGSGWGFATILCLMWRRAVEIGTCW*	CCTTTCTCTGTGCTGACTGCGGGGGGATGGGGATCTGGGTGGGGGTTCGCTACGATCCTCTGCTTGATGTGG---CGGGCGGTTGAGATCGGAACTTGTTGGTGATAGATCTGCCTGTATGCTTCGTGTTGCATTGAATGGTGCTTAGATCTGTGGGATTGGTGATGGGATAGTCGGATTTGTCCATGTATTTGATACTTTCCCGGGTTGATTGCCATGGATTTGCGGGATATGGCATTA	CCTTTCTCTGTGCTGACTGCGGGGGGATGGGGATCTGGGTGGGGGTTCGCTACGATTCTCTGCTTGATGTGGAGACGGGCGGTTGAGATCGGAACTTGTTGGTGATAGATCTGCCTGTATGCTTCGTGTTGCATTGAATGGTGCTTAGATCTGTGGGATTGGTGATGGGATAGTCGGATTTGTCCATGTATTTGATACTTTCCCGGGTTGATTGCCATGGATTTGCGGGATATGGCATTA
CCTTTCTCTGTGCTGACTGCGGGGGGATGGGGATCTGGGTGGGGGTTCGCTACGATTCTCTGC-------------------TTGAGATCGGAACTTGTTGGTGATAGATCCGCCTGTATGCTTCGTGTTGCATTGAATGGTGCTTAGATCTGTGGGATTGGTGATGGGATAGTCGGATTTGTCCATGTATTTGATACTTTCCCGGGTTGATTGCCATGGATTTGCGGGATATGGCATTA	7	33	Deletion	0.01	-19	PFSVLTAGGWGSGWGFATILCLRSELVGDRSACMLRVALNGA*	PFSVLTAGGWGSGWGFATILCLMWRRAVEIGTCW*	CCTTTCTCTGTGCTGACTGCGGGGGGATGGGGATCTGGGTGGGGGTTCGCTACGATTCTCTGC-------------------TTGAGATCGGAACTTGTTGGTGATAGATCCGCCTGTATGCTTCGTGTTGCATTGAATGGTGCTTAGATCTGTGGGATTGGTGATGGGATAGTCGGATTTGTCCATGTATTTGATACTTTCCCGGGTTGATTGCCATGGATTTGCGGGATATGGCATTA	CCTTTCTCTGTGCTGACTGCGGGGGGATGGGGATCTGGGTGGGGGTTCGCTACGATTCTCTGCTTGATGTGGAGACGGGCGGTTGAGATCGGAACTTGTTGGTGATAGATCTGCCTGTATGCTTCGTGTTGCATTGAATGGTGCTTAGATCTGTGGGATTGGTGATGGGATAGTCGGATTTGTCCATGTATTTGATACTTTCCCGGGTTGATTGCCATGGATTTGCGGGATATGGCATTA
CCTTTCTCTGTGCTGACTGCGGGGGGATGGGGATCTGGGTGGGGGTTCGCTACGATTCTCTGCTTGACGTGGAGACcGGGCGGTTGAGATCGGAACTTGTTGGTGATAGATCTGCCTGTATGCTTCGTGTTGCATTGAATGGTGCTTAGATCTGTGGGATTGGTGATGGGATAGTCGGATTTGTCCATGTATTTGATACTTTCCCGGGTTGATTGCCATGGATTTGCGGGATATGGCATTA	7	33	Insertion	0.01	1	PFSVLTAGGWGSGWGFATILCLTWRPGG*	PFSVLTAGGWGSGWGFATILCLMWRRAVEIGTCW*	CCTTTCTCTGTGCTGACTGCGGGGGGATGGGGATCTGGGTGGGGGTTCGCTACGATTCTCTGCTTGACGTGGAGACCGGGCGGTTGAGATCGGAACTTGTTGGTGATAGATCTGCCTGTATGCTTCGTGTTGCATTGAATGGTGCTTAGATCTGTGGGATTGGTGATGGGATAGTCGGATTTGTCCATGTATTTGATACTTTCCCGGGTTGATTGCCATGGATTTGCGGGATATGGCATTA	CCTTTCTCTGTGCTGACTGCGGGGGGATGGGGATCTGGGTGGGGGTTCGCTACGATTCTCTGCTTGATGTGGAGACGGGCGGTTGAGATCGGAACTTGTTGGTGATAGATCTGCCTGTATGCTTCGTGTTGCATTGAATGGTGCTTAGATCTGTGGGATTGGTGATGGGATAGTCGGATTTGTCCATGTATTTGATACTTTCCCGGGTTGATTGCCATGGATTTGCGGGATATGGCATTA
CCTTTCTCTGTGCTGACTGCGGGGGGATGGGGATCTGGGTGGGGGTTCGCTACGATTCTCTGCTTGATGT-----CGGGCGGTTGAGATCGGAACTTGTTGGTGATAGATCTGCCTGTATGCTTCGTGTTGCATTGAATGGTGCTTAGATCTGTGGGATTGGTGATGGGATAGTCGGATTTGTCCATGTATTTGATACTTTCCCGGGTTGATTGCCATGGATTTGCGGGATATGGCATTA	7	32	Deletion	0.01	-5	PFSVLTAGGWGSGWGFATILCLMSGG*	PFSVLTAGGWGSGWGFATILCLMWRRAVEIGTCW*	CCTTTCTCTGTGCTGACTGCGGGGGGATGGGGATCTGGGTGGGGGTTCGCTACGATTCTCTGCTTGATGT-----CGGGCGGTTGAGATCGGAACTTGTTGGTGATAGATCTGCCTGTATGCTTCGTGTTGCATTGAATGGTGCTTAGATCTGTGGGATTGGTGATGGGATAGTCGGATTTGTCCATGTATTTGATACTTTCCCGGGTTGATTGCCATGGATTTGCGGGATATGGCATTA	CCTTTCTCTGTGCTGACTGCGGGGGGATGGGGATCTGGGTGGGGGTTCGCTACGATTCTCTGCTTGATGTGGAGACGGGCGGTTGAGATCGGAACTTGTTGGTGATAGATCTGCCTGTATGCTTCGTGTTGCATTGAATGGTGCTTAGATCTGTGGGATTGGTGATGGGATAGTCGGATTTGTCCATGTATTTGATACTTTCCCGGGTTGATTGCCATGGATTTGCGGGATATGGCATTA
CCTTTCTCTGTGCTGACTGCGGGGGGATGGGGATCTGGGTGGGGGTTCGCTACGATTCTCTGCTTGATGTG-------------GAGATCGGAACTTGTTGGTGATAGATCTGCCTGTATGCTTCGCGTTGCATTGAATGGTGCTTAGATCTGTGGGATTGGTGATGGGATAGTCGGATTTGTCCATGTATTTGATACTTTCCCGGGTTGATTGCCATGGATTTGCGGGATATGGCATTA	7	34	Deletion	0.01	-13	PFSVLTAGGWGSGWGFATILCLMWRSELVGDRSACMLRVALNGA*	PFSVLTAGGWGSGWGFATILCLMWRRAVEIGTCW*	CCTTTCTCTGTGCTGACTGCGGGGGGATGGGGATCTGGGTGGGGGTTCGCTACGATTCTCTGCTTGATGTG-------------GAGATCGGAACTTGTTGGTGATAGATCTGCCTGTATGCTTCGCGTTGCATTGAATGGTGCTTAGATCTGTGGGATTGGTGATGGGATAGTCGGATTTGTCCATGTATTTGATACTTTCCCGGGTTGATTGCCATGGATTTGCGGGATATGGCATTA	CCTTTCTCTGTGCTGACTGCGGGGGGATGGGGATCTGGGTGGGGGTTCGCTACGATTCTCTGCTTGATGTGGAGACGGGCGGTTGAGATCGGAACTTGTTGGTGATAGATCTGCCTGTATGCTTCGTGTTGCATTGAATGGTGCTTAGATCTGTGGGATTGGTGATGGGATAGTCGGATTTGTCCATGTATTTGATACTTTCCCGGGTTGATTGCCATGGATTTGCGGGATATGGCATTA
CCTTTCTCTGTGCTGACTGCGGGGGGATGGGGATCTGGGTGGGGGTTCGCTACGATTCTCTGCTTGATGTG-------------GAGATCGGAACTTGTTGGTGATAGATCTGCCTGTATGCTTCGTGTTGCATTGAATGGTGCTTAGATCTGTGGGATTGGTGATGGGATAGTCGGATTTGTCCATGTATTTGATACTTTCCCGGGTTGATTGCCATGGATTTGC-GGATATGGCATTA	7	34	Deletion	0.01	-14	PFSVLTAGGWGSGWGFATILCLMWRSELVGDRSACMLRVALNGA*	PFSVLTAGGWGSGWGFATILCLMWRRAVEIGTCW*	CCTTTCTCTGTGCTGACTGCGGGGGGATGGGGATCTGGGTGGGGGTTCGCTACGATTCTCTGCTTGATGTG-------------GAGATCGGAACTTGTTGGTGATAGATCTGCCTGTATGCTTCGTGTTGCATTGAATGGTGCTTAGATCTGTGGGATTGGTGATGGGATAGTCGGATTTGTCCATGTATTTGATACTTTCCCGGGTTGATTGCCATGGATTTGC-GGATATGGCATTA	CCTTTCTCTGTGCTGACTGCGGGGGGATGGGGATCTGGGTGGGGGTTCGCTACGATTCTCTGCTTGATGTGGAGACGGGCGGTTGAGATCGGAACTTGTTGGTGATAGATCTGCCTGTATGCTTCGTGTTGCATTGAATGGTGCTTAGATCTGTGGGATTGGTGATGGGATAGTCGGATTTGTCCATGTATTTGATACTTTCCCGGGTTGATTGCCATGGATTTGCGGGATATGGCATTA
CCTTTCTCTGTGCTGACTGCGGGGGGATGGGGATCTGGGTGGGGGTTCGCTACGATTCTCTGCTTGATGTGG----GGGCGGCTGAGATCGGAACTTGTTGGTGATAGATCTGCCTGTATGCTTCGTGTTGCATTGAATGGTGCTTAGATCTGTGGGATTGGTGATGGGATAGTCGGATTTGTCCATGTATTTGATACTTTCCCGGGTTGATTGCCATGGATTTGCGGGATATGGCATTA	7	33	Deletion	0.01	-4	PFSVLTAGGWGSGWGFATILCLMWGRLRSELVGDRSACMLRVALNGA*	PFSVLTAGGWGSGWGFATILCLMWRRAVEIGTCW*	CCTTTCTCTGTGCTGACTGCGGGGGGATGGGGATCTGGGTGGGGGTTCGCTACGATTCTCTGCTTGATGTGG----GGGCGGCTGAGATCGGAACTTGTTGGTGATAGATCTGCCTGTATGCTTCGTGTTGCATTGAATGGTGCTTAGATCTGTGGGATTGGTGATGGGATAGTCGGATTTGTCCATGTATTTGATACTTTCCCGGGTTGATTGCCATGGATTTGCGGGATATGGCATTA	CCTTTCTCTGTGCTGACTGCGGGGGGATGGGGATCTGGGTGGGGGTTCGCTACGATTCTCTGCTTGATGTGGAGACGGGCGGTTGAGATCGGAACTTGTTGGTGATAGATCTGCCTGTATGCTTCGTGTTGCATTGAATGGTGCTTAGATCTGTGGGATTGGTGATGGGATAGTCGGATTTGTCCATGTATTTGATACTTTCCCGGGTTGATTGCCATGGATTTGCGGGATATGGCATTA
CCTTTCTCTGTGCTGACTGCGGGGGGATGGGGATCTGGGTGGGGGTTCGCTACGATTCTCTGCTTGATGTGG----GGGCGGTTGAGATCGGAACTTGTTGGCGATAGATCTGCCTGTATGCTTCGTGTTGCATTGAATGGTGCTTAGATCTGTGGGATTGGTGATGGGATAGTCGGATTTGTCCATGTATTTGATACTTTCCCGGGTTGATTGCCATGGATTTGCGGGATATGGCATTA	7	32	Deletion	0.01	-4	PFSVLTAGGWGSGWGFATILCLMWGRLRSELVGDRSACMLRVALNGA*	PFSVLTAGGWGSGWGFATILCLMWRRAVEIGTCW*	CCTTTCTCTGTGCTGACTGCGGGGGGATGGGGATCTGGGTGGGGGTTCGCTACGATTCTCTGCTTGATGTGG----GGGCGGTTGAGATCGGAACTTGTTGGCGATAGATCTGCCTGTATGCTTCGTGTTGCATTGAATGGTGCTTAGATCTGTGGGATTGGTGATGGGATAGTCGGATTTGTCCATGTATTTGATACTTTCCCGGGTTGATTGCCATGGATTTGCGGGATATGGCATTA	CCTTTCTCTGTGCTGACTGCGGGGGGATGGGGATCTGGGTGGGGGTTCGCTACGATTCTCTGCTTGATGTGGAGACGGGCGGTTGAGATCGGAACTTGTTGGTGATAGATCTGCCTGTATGCTTCGTGTTGCATTGAATGGTGCTTAGATCTGTGGGATTGGTGATGGGATAGTCGGATTTGTCCATGTATTTGATACTTTCCCGGGTTGATTGCCATGGATTTGCGGGATATGGCATTA
CCTTTCTCTGTGCTGACTGCGGGGGGATGGGGATCTGGGTGGGGGTTCGCTACGATTCTCTGCTTGATGTGG----GGGCGGTTGAGATCGGAACTTGTTGGTGATAGATCTGCCTGTATGCCTCGTGTTGCATTGAATGGTGCTTAGATCTGTGGGATTGGTGATGGGATAGTCGGATTTGTCCATGTATTTGATACTTTCCCGGGTTGATTGCCATGGATTTGCGGGATATGGCATTA	7	33	Deletion	0.01	-4	PFSVLTAGGWGSGWGFATILCLMWGRLRSELVGDRSACMPRVALNGA*	PFSVLTAGGWGSGWGFATILCLMWRRAVEIGTCW*	CCTTTCTCTGTGCTGACTGCGGGGGGATGGGGATCTGGGTGGGGGTTCGCTACGATTCTCTGCTTGATGTGG----GGGCGGTTGAGATCGGAACTTGTTGGTGATAGATCTGCCTGTATGCCTCGTGTTGCATTGAATGGTGCTTAGATCTGTGGGATTGGTGATGGGATAGTCGGATTTGTCCATGTATTTGATACTTTCCCGGGTTGATTGCCATGGATTTGCGGGATATGGCATTA	CCTTTCTCTGTGCTGACTGCGGGGGGATGGGGATCTGGGTGGGGGTTCGCTACGATTCTCTGCTTGATGTGGAGACGGGCGGTTGAGATCGGAACTTGTTGGTGATAGATCTGCCTGTATGCTTCGTGTTGCATTGAATGGTGCTTAGATCTGTGGGATTGGTGATGGGATAGTCGGATTTGTCCATGTATTTGATACTTTCCCGGGTTGATTGCCATGGATTTGCGGGATATGGCATTA
CCTTTCTCTGTGCTGACTGCGGGGGGATGGGGATCTGGGTGGGGGTTCGCTACGATTCTCTGCTTGATGTGG----GGGCGGTTGAGATCGGAACTTGTTGGTGATAGATCTGCCTGTATGCTTCGTGTTGCATTGAATGGCGCTTAGATCTGTGGGATTGGTGATGGGATAGTCGGATTTGTCCATGTATTTGATACTTTCCCGGGTTGATTGCCATGGATTTGCGGGATATGGCATTA	7	33	Deletion	0.01	-4	PFSVLTAGGWGSGWGFATILCLMWGRLRSELVGDRSACMLRVALNGA*	PFSVLTAGGWGSGWGFATILCLMWRRAVEIGTCW*	CCTTTCTCTGTGCTGACTGCGGGGGGATGGGGATCTGGGTGGGGGTTCGCTACGATTCTCTGCTTGATGTGG----GGGCGGTTGAGATCGGAACTTGTTGGTGATAGATCTGCCTGTATGCTTCGTGTTGCATTGAATGGCGCTTAGATCTGTGGGATTGGTGATGGGATAGTCGGATTTGTCCATGTATTTGATACTTTCCCGGGTTGATTGCCATGGATTTGCGGGATATGGCATTA	CCTTTCTCTGTGCTGACTGCGGGGGGATGGGGATCTGGGTGGGGGTTCGCTACGATTCTCTGCTTGATGTGGAGACGGGCGGTTGAGATCGGAACTTGTTGGTGATAGATCTGCCTGTATGCTTCGTGTTGCATTGAATGGTGCTTAGATCTGTGGGATTGGTGATGGGATAGTCGGATTTGTCCATGTATTTGATACTTTCCCGGGTTGATTGCCATGGATTTGCGGGATATGGCATTA
CCTTTCTCTGTGCTGACTGCGGGGGGATGGGGATCTGGGTGGGGGTTCGCTACGATTCTCTGCTTGATGTGG----GGGCGGTTGAGATCGGAACTTGTTGGTGATAGATCTGCCTGTATGCTTCGTGTTGCATTGAGTGGTGCTTAGATCTGTGGGATTGGTGATGGGATAGTCGGATTTGTCCATGTATTTGATACTTTCCCGGGTTGATTGCCATGGATTTGCGGGATATGGCATTA	7	30	Deletion	0.01	-4	PFSVLTAGGWGSGWGFATILCLMWGRLRSELVGDRSACMLRVALSGA*	PFSVLTAGGWGSGWGFATILCLMWRRAVEIGTCW*	CCTTTCTCTGTGCTGACTGCGGGGGGATGGGGATCTGGGTGGGGGTTCGCTACGATTCTCTGCTTGATGTGG----GGGCGGTTGAGATCGGAACTTGTTGGTGATAGATCTGCCTGTATGCTTCGTGTTGCATTGAGTGGTGCTTAGATCTGTGGGATTGGTGATGGGATAGTCGGATTTGTCCATGTATTTGATACTTTCCCGGGTTGATTGCCATGGATTTGCGGGATATGGCATTA	CCTTTCTCTGTGCTGACTGCGGGGGGATGGGGATCTGGGTGGGGGTTCGCTACGATTCTCTGCTTGATGTGGAGACGGGCGGTTGAGATCGGAACTTGTTGGTGATAGATCTGCCTGTATGCTTCGTGTTGCATTGAATGGTGCTTAGATCTGTGGGATTGGTGATGGGATAGTCGGATTTGTCCATGTATTTGATACTTTCCCGGGTTGATTGCCATGGATTTGCGGGATATGGCATTA
CCTTTCTCTGTGCTGACTGCGGGGGGATGGGGATCTGGGTGGGGGTTCGCTACGATTCTCTGCTTGATGTGG----GGGCGGTTGAGATCGGAGCTTGTTGGTGATAGATCTGCCTGTATGCTTCGTGTTGCATTGAATGGTGCTTAGATCTGTGGGATTGGTGATGGGATAGTCGGATTTGTCCATGTATTTGATACTTTCCCGGGTTGATTGCCATGGATTTGCGGGATATGGCATTA	7	31	Deletion	0.01	-4	PFSVLTAGGWGSGWGFATILCLMWGRLRSELVGDRSACMLRVALNGA*	PFSVLTAGGWGSGWGFATILCLMWRRAVEIGTCW*	CCTTTCTCTGTGCTGACTGCGGGGGGATGGGGATCTGGGTGGGGGTTCGCTACGATTCTCTGCTTGATGTGG----GGGCGGTTGAGATCGGAGCTTGTTGGTGATAGATCTGCCTGTATGCTTCGTGTTGCATTGAATGGTGCTTAGATCTGTGGGATTGGTGATGGGATAGTCGGATTTGTCCATGTATTTGATACTTTCCCGGGTTGATTGCCATGGATTTGCGGGATATGGCATTA	CCTTTCTCTGTGCTGACTGCGGGGGGATGGGGATCTGGGTGGGGGTTCGCTACGATTCTCTGCTTGATGTGGAGACGGGCGGTTGAGATCGGAACTTGTTGGTGATAGATCTGCCTGTATGCTTCGTGTTGCATTGAATGGTGCTTAGATCTGTGGGATTGGTGATGGGATAGTCGGATTTGTCCATGTATTTGATACTTTCCCGGGTTGATTGCCATGGATTTGCGGGATATGGCATTA
CCTTTCTCTGTGCTGACTGCGGGGGGATGGGGATCTGGGTGGGGGTTCGCTACGATTCTCTGCTTGATGTGG----GGGCGGTTGAGGTCGGAACTTGTTGGTGATAGATCTGCCTGTATGCTTCGTGTTGCATTGAATGGTGCTTAGATCTGTGGGATTGGTGATGGGATAGTCGGATTTGTCCATGTATTTGATACTTTCCCGGGTTGATTGCCATGGATTTGCGGGATATGGCATTA	7	32	Deletion	0.01	-4	PFSVLTAGGWGSGWGFATILCLMWGRLRSELVGDRSACMLRVALNGA*	PFSVLTAGGWGSGWGFATILCLMWRRAVEIGTCW*	CCTTTCTCTGTGCTGACTGCGGGGGGATGGGGATCTGGGTGGGGGTTCGCTACGATTCTCTGCTTGATGTGG----GGGCGGTTGAGGTCGGAACTTGTTGGTGATAGATCTGCCTGTATGCTTCGTGTTGCATTGAATGGTGCTTAGATCTGTGGGATTGGTGATGGGATAGTCGGATTTGTCCATGTATTTGATACTTTCCCGGGTTGATTGCCATGGATTTGCGGGATATGGCATTA	CCTTTCTCTGTGCTGACTGCGGGGGGATGGGGATCTGGGTGGGGGTTCGCTACGATTCTCTGCTTGATGTGGAGACGGGCGGTTGAGATCGGAACTTGTTGGTGATAGATCTGCCTGTATGCTTCGTGTTGCATTGAATGGTGCTTAGATCTGTGGGATTGGTGATGGGATAGTCGGATTTGTCCATGTATTTGATACTTTCCCGGGTTGATTGCCATGGATTTGCGGGATATGGCATTA
CCTTTCTCTGTGCTGACTGCGGGGGGATGGGGATCTGGGTGGGGGTTCGCTACGATTCTCTGCTTGATGTGG---CGGGCGGCTGAGATCGGAACTTGTTGGTGATAGATCTGCCTGTATGCTTCGTGTTGCATTGAATGGTGCTTAGATCTGTGGGATTGGTGATGGGATAGTCGGATTTGTCCATGTATTTGATACTTTCCCGGGTTGATTGCCATGGATTTGCGGGATATGGCATTA	7	35	Deletion	0.01	-3	PFSVLTAGGWGSGWGFATILCLMWRAAEIGTCW*	PFSVLTAGGWGSGWGFATILCLMWRRAVEIGTCW*	CCTTTCTCTGTGCTGACTGCGGGGGGATGGGGATCTGGGTGGGGGTTCGCTACGATTCTCTGCTTGATGTGG---CGGGCGGCTGAGATCGGAACTTGTTGGTGATAGATCTGCCTGTATGCTTCGTGTTGCATTGAATGGTGCTTAGATCTGTGGGATTGGTGATGGGATAGTCGGATTTGTCCATGTATTTGATACTTTCCCGGGTTGATTGCCATGGATTTGCGGGATATGGCATTA	CCTTTCTCTGTGCTGACTGCGGGGGGATGGGGATCTGGGTGGGGGTTCGCTACGATTCTCTGCTTGATGTGGAGACGGGCGGTTGAGATCGGAACTTGTTGGTGATAGATCTGCCTGTATGCTTCGTGTTGCATTGAATGGTGCTTAGATCTGTGGGATTGGTGATGGGATAGTCGGATTTGTCCATGTATTTGATACTTTCCCGGGTTGATTGCCATGGATTTGCGGGATATGGCATTA
CCTTTCTCTGTGCTGACTGCGGGGGGATGGGGATCTGGGTGGGGGTTCGCTACGATTCTCTGCTTGATGTGG---CGGGCGGTTGAGACCGGAACTTGTTGGTGATAGATCTGCCTGTATGCTTCGTGTTGCATTGAATGGTGCTTAGATCTGTGGGATTGGTGATGGGATAGTCGGATTTGTCCATGTATTTGATACTTTCCCGGGTTGATTGCCATGGATTTGCGGGATATGGCATTA	7	30	Deletion	0.01	-3	PFSVLTAGGWGSGWGFATILCLMWRAVETGTCW*	PFSVLTAGGWGSGWGFATILCLMWRRAVEIGTCW*	CCTTTCTCTGTGCTGACTGCGGGGGGATGGGGATCTGGGTGGGGGTTCGCTACGATTCTCTGCTTGATGTGG---CGGGCGGTTGAGACCGGAACTTGTTGGTGATAGATCTGCCTGTATGCTTCGTGTTGCATTGAATGGTGCTTAGATCTGTGGGATTGGTGATGGGATAGTCGGATTTGTCCATGTATTTGATACTTTCCCGGGTTGATTGCCATGGATTTGCGGGATATGGCATTA	CCTTTCTCTGTGCTGACTGCGGGGGGATGGGGATCTGGGTGGGGGTTCGCTACGATTCTCTGCTTGATGTGGAGACGGGCGGTTGAGATCGGAACTTGTTGGTGATAGATCTGCCTGTATGCTTCGTGTTGCATTGAATGGTGCTTAGATCTGTGGGATTGGTGATGGGATAGTCGGATTTGTCCATGTATTTGATACTTTCCCGGGTTGATTGCCATGGATTTGCGGGATATGGCATTA
CCTTTCTCTGTGCTGACTGCGGGGGGATGGGGATCTGGGTGGGGGTTCGCTACGATTCTCTGCTTGATGTGG---CGGGCGGTTGAGATCGGAACCTGTTGGTGATAGATCTGCCTGTATGCTTCGTGTTGCATTGAATGGTGCTTAGATCTGTGGGATTGGTGATGGGATAGTCGGATTTGTCCATGTATTTGATACTTTCCCGGGTTGATTGCCATGGATTTGCGGGATATGGCATTA	7	30	Deletion	0.01	-3	PFSVLTAGGWGSGWGFATILCLMWRAVEIGTCW*	PFSVLTAGGWGSGWGFATILCLMWRRAVEIGTCW*	CCTTTCTCTGTGCTGACTGCGGGGGGATGGGGATCTGGGTGGGGGTTCGCTACGATTCTCTGCTTGATGTGG---CGGGCGGTTGAGATCGGAACCTGTTGGTGATAGATCTGCCTGTATGCTTCGTGTTGCATTGAATGGTGCTTAGATCTGTGGGATTGGTGATGGGATAGTCGGATTTGTCCATGTATTTGATACTTTCCCGGGTTGATTGCCATGGATTTGCGGGATATGGCATTA	CCTTTCTCTGTGCTGACTGCGGGGGGATGGGGATCTGGGTGGGGGTTCGCTACGATTCTCTGCTTGATGTGGAGACGGGCGGTTGAGATCGGAACTTGTTGGTGATAGATCTGCCTGTATGCTTCGTGTTGCATTGAATGGTGCTTAGATCTGTGGGATTGGTGATGGGATAGTCGGATTTGTCCATGTATTTGATACTTTCCCGGGTTGATTGCCATGGATTTGCGGGATATGGCATTA
CCTTTCTCTGTGCTGACTGCGGGGGGATGGGGATCTGGGTGGGGGTTCGCTACGATTCTCTGCTTGATGTGG---CGGGCGGTTGAGATCGGAACTTGCTGGTGATAGATCTGCCTGTATGCTTCGTGTTGCATTGAATGGTGCTTAGATCTGTGGGATTGGTGATGGGATAGTCGGATTTGTCCATGTATTTGATACTTTCCCGGGTTGATTGCCATGGATTTGCGGGATATGGCATTA	7	27	Deletion	0.01	-3	PFSVLTAGGWGSGWGFATILCLMWRAVEIGTCW*	PFSVLTAGGWGSGWGFATILCLMWRRAVEIGTCW*	CCTTTCTCTGTGCTGACTGCGGGGGGATGGGGATCTGGGTGGGGGTTCGCTACGATTCTCTGCTTGATGTGG---CGGGCGGTTGAGATCGGAACTTGCTGGTGATAGATCTGCCTGTATGCTTCGTGTTGCATTGAATGGTGCTTAGATCTGTGGGATTGGTGATGGGATAGTCGGATTTGTCCATGTATTTGATACTTTCCCGGGTTGATTGCCATGGATTTGCGGGATATGGCATTA	CCTTTCTCTGTGCTGACTGCGGGGGGATGGGGATCTGGGTGGGGGTTCGCTACGATTCTCTGCTTGATGTGGAGACGGGCGGTTGAGATCGGAACTTGTTGGTGATAGATCTGCCTGTATGCTTCGTGTTGCATTGAATGGTGCTTAGATCTGTGGGATTGGTGATGGGATAGTCGGATTTGTCCATGTATTTGATACTTTCCCGGGTTGATTGCCATGGATTTGCGGGATATGGCATTA
CCTTTCTCTGTGCTGACTGCGGGGGGATGGGGATCTGGGTGGGGGTTCGCTACGATTCTCTGCTTGATGTGG---CGGGCGGTTGAGATCGGAACTTGTTGGTGATAGATCTGCCTGTATGCTTCATGTTGCATTGAATGGTGCTTAGATCTGTGGGATTGGTGATGGGATAGTCGGATTTGTCCATGTATTTGATACTTTCCCGGGTTGATTGCCATGGATTTGCGGGATATGGCATTA	7	29	Deletion	0.01	-3	PFSVLTAGGWGSGWGFATILCLMWRAVEIGTCW*	PFSVLTAGGWGSGWGFATILCLMWRRAVEIGTCW*	CCTTTCTCTGTGCTGACTGCGGGGGGATGGGGATCTGGGTGGGGGTTCGCTACGATTCTCTGCTTGATGTGG---CGGGCGGTTGAGATCGGAACTTGTTGGTGATAGATCTGCCTGTATGCTTCATGTTGCATTGAATGGTGCTTAGATCTGTGGGATTGGTGATGGGATAGTCGGATTTGTCCATGTATTTGATACTTTCCCGGGTTGATTGCCATGGATTTGCGGGATATGGCATTA	CCTTTCTCTGTGCTGACTGCGGGGGGATGGGGATCTGGGTGGGGGTTCGCTACGATTCTCTGCTTGATGTGGAGACGGGCGGTTGAGATCGGAACTTGTTGGTGATAGATCTGCCTGTATGCTTCGTGTTGCATTGAATGGTGCTTAGATCTGTGGGATTGGTGATGGGATAGTCGGATTTGTCCATGTATTTGATACTTTCCCGGGTTGATTGCCATGGATTTGCGGGATATGGCATTA
CCTTTCTCTGTGCTGACTGCGGGGGGATGGGGATCTGGGTGGGGGTTCGCTACGATTCTCTGCTTGATGTGG---CGGGCGGTTGAGATCGGAACTTGTTGGTGATAGATCTGCCTGTATGCTTCGTGTTGCATTGAATGGCGCTTAGATCTGTGGGATTGGTGATGGGATAGTCGGATTTGTCCATGTATTTGATACTTTCCCGGGTTGATTGCCATGGATTTGCGGGATATGGCATTA	7	29	Deletion	0.01	-3	PFSVLTAGGWGSGWGFATILCLMWRAVEIGTCW*	PFSVLTAGGWGSGWGFATILCLMWRRAVEIGTCW*	CCTTTCTCTGTGCTGACTGCGGGGGGATGGGGATCTGGGTGGGGGTTCGCTACGATTCTCTGCTTGATGTGG---CGGGCGGTTGAGATCGGAACTTGTTGGTGATAGATCTGCCTGTATGCTTCGTGTTGCATTGAATGGCGCTTAGATCTGTGGGATTGGTGATGGGATAGTCGGATTTGTCCATGTATTTGATACTTTCCCGGGTTGATTGCCATGGATTTGCGGGATATGGCATTA	CCTTTCTCTGTGCTGACTGCGGGGGGATGGGGATCTGGGTGGGGGTTCGCTACGATTCTCTGCTTGATGTGGAGACGGGCGGTTGAGATCGGAACTTGTTGGTGATAGATCTGCCTGTATGCTTCGTGTTGCATTGAATGGTGCTTAGATCTGTGGGATTGGTGATGGGATAGTCGGATTTGTCCATGTATTTGATACTTTCCCGGGTTGATTGCCATGGATTTGCGGGATATGGCATTA
CCTTTCTCTGTGCTGACTGCGGGGGGATGGGGATCTGGGTGGGGGTTCGCTACGATTCTCTGCTTGATGTGG---CGGGCGGTTGAGATCGGAACTTGTTGGTGATAGATCTGCCTGTATGCTTCGTGTTGCATTGAATGGTGCTTAGATCTGTGGGACTGGTGATGGGATAGTCGGATTTGTCCATGTATTTGATACTTTCCCGGGTTGATTGCCATGGATTTGCGGGATATGGCATTA	7	29	Deletion	0.01	-3	PFSVLTAGGWGSGWGFATILCLMWRAVEIGTCW*	PFSVLTAGGWGSGWGFATILCLMWRRAVEIGTCW*	CCTTTCTCTGTGCTGACTGCGGGGGGATGGGGATCTGGGTGGGGGTTCGCTACGATTCTCTGCTTGATGTGG---CGGGCGGTTGAGATCGGAACTTGTTGGTGATAGATCTGCCTGTATGCTTCGTGTTGCATTGAATGGTGCTTAGATCTGTGGGACTGGTGATGGGATAGTCGGATTTGTCCATGTATTTGATACTTTCCCGGGTTGATTGCCATGGATTTGCGGGATATGGCATTA	CCTTTCTCTGTGCTGACTGCGGGGGGATGGGGATCTGGGTGGGGGTTCGCTACGATTCTCTGCTTGATGTGGAGACGGGCGGTTGAGATCGGAACTTGTTGGTGATAGATCTGCCTGTATGCTTCGTGTTGCATTGAATGGTGCTTAGATCTGTGGGATTGGTGATGGGATAGTCGGATTTGTCCATGTATTTGATACTTTCCCGGGTTGATTGCCATGGATTTGCGGGATATGGCATTA
CCTTTCTCTGTGCTGACTGCGGGGGGATGGGGATCTGGGTGGGGGTTCGCTACGATTCTCTGCTTGATGTGG---CGGGCGGTTGAGATCGGAACTTGTTGGTGATAGATCTGCCTGTATGCTTCGTGTTGCATTGAATGGTGCTTAGATCTGTGGGATTGGTGACGGGATAGTCGGATTTGTCCATGTATTTGATACTTTCCCGGGTTGATTGCCATGGATTTGCGGGATATGGCATTA	7	30	Deletion	0.01	-3	PFSVLTAGGWGSGWGFATILCLMWRAVEIGTCW*	PFSVLTAGGWGSGWGFATILCLMWRRAVEIGTCW*	CCTTTCTCTGTGCTGACTGCGGGGGGATGGGGATCTGGGTGGGGGTTCGCTACGATTCTCTGCTTGATGTGG---CGGGCGGTTGAGATCGGAACTTGTTGGTGATAGATCTGCCTGTATGCTTCGTGTTGCATTGAATGGTGCTTAGATCTGTGGGATTGGTGACGGGATAGTCGGATTTGTCCATGTATTTGATACTTTCCCGGGTTGATTGCCATGGATTTGCGGGATATGGCATTA	CCTTTCTCTGTGCTGACTGCGGGGGGATGGGGATCTGGGTGGGGGTTCGCTACGATTCTCTGCTTGATGTGGAGACGGGCGGTTGAGATCGGAACTTGTTGGTGATAGATCTGCCTGTATGCTTCGTGTTGCATTGAATGGTGCTTAGATCTGTGGGATTGGTGATGGGATAGTCGGATTTGTCCATGTATTTGATACTTTCCCGGGTTGATTGCCATGGATTTGCGGGATATGGCATTA
CCTTTCTCTGTGCTGACTGCGGGGGGATGGGGATCTGGGTGGGGGTTCGCTACGATTCTCTGCTTGATGTGG---CGGGCGGTTGAGATCGGAACTTGTTGGTGATAGATCTGCCTGTATGCTTCGTGTTGCATTGAATGGTGCTTAGATCTGTGGGATTGGTGATGGGATAGTCGGATTTGTCCATGTATTTGACACTTTCCCGGGTTGATTGCCATGGATTTGCGGGATATGGCATTA	7	30	Deletion	0.01	-3	PFSVLTAGGWGSGWGFATILCLMWRAVEIGTCW*	PFSVLTAGGWGSGWGFATILCLMWRRAVEIGTCW*	CCTTTCTCTGTGCTGACTGCGGGGGGATGGGGATCTGGGTGGGGGTTCGCTACGATTCTCTGCTTGATGTGG---CGGGCGGTTGAGATCGGAACTTGTTGGTGATAGATCTGCCTGTATGCTTCGTGTTGCATTGAATGGTGCTTAGATCTGTGGGATTGGTGATGGGATAGTCGGATTTGTCCATGTATTTGACACTTTCCCGGGTTGATTGCCATGGATTTGCGGGATATGGCATTA	CCTTTCTCTGTGCTGACTGCGGGGGGATGGGGATCTGGGTGGGGGTTCGCTACGATTCTCTGCTTGATGTGGAGACGGGCGGTTGAGATCGGAACTTGTTGGTGATAGATCTGCCTGTATGCTTCGTGTTGCATTGAATGGTGCTTAGATCTGTGGGATTGGTGATGGGATAGTCGGATTTGTCCATGTATTTGATACTTTCCCGGGTTGATTGCCATGGATTTGCGGGATATGGCATTA
CCTTTCTCTGTGCTGACTGCGGGGGGATGGGGATCTGGGTGGGGGTTCGCTACGATTCTCTGCTTGATGTGG---CGGGCGGTTGAGATCGGAACTTGTTGGTGATAGATCTGCCTGTATGCTTCGTGTTGCATTGAATGGTGCTTAGATCTGTGGGATTGGTGATGGGATAGTCGGATTTGTCCATGTATTTGATACCTTCCCGGGTTGATTGCCATGGATTTGCGGGATATGGCATTA	7	32	Deletion	0.01	-3	PFSVLTAGGWGSGWGFATILCLMWRAVEIGTCW*	PFSVLTAGGWGSGWGFATILCLMWRRAVEIGTCW*	CCTTTCTCTGTGCTGACTGCGGGGGGATGGGGATCTGGGTGGGGGTTCGCTACGATTCTCTGCTTGATGTGG---CGGGCGGTTGAGATCGGAACTTGTTGGTGATAGATCTGCCTGTATGCTTCGTGTTGCATTGAATGGTGCTTAGATCTGTGGGATTGGTGATGGGATAGTCGGATTTGTCCATGTATTTGATACCTTCCCGGGTTGATTGCCATGGATTTGCGGGATATGGCATTA	CCTTTCTCTGTGCTGACTGCGGGGGGATGGGGATCTGGGTGGGGGTTCGCTACGATTCTCTGCTTGATGTGGAGACGGGCGGTTGAGATCGGAACTTGTTGGTGATAGATCTGCCTGTATGCTTCGTGTTGCATTGAATGGTGCTTAGATCTGTGGGATTGGTGATGGGATAGTCGGATTTGTCCATGTATTTGATACTTTCCCGGGTTGATTGCCATGGATTTGCGGGATATGGCATTA
CCTTTCTCTGTGCTGACTGCGGGGGGATGGGGATCTGGGTGGGGGTTCGCTACGATTCTCTGCTTGATGTGG---CGGGCGGTTGAGATCGGAACTTGTTGGTGATAGGTCTGCCTGTATGCTTCGTGTTGCATTGAATGGTGCTTAGATCTGTGGGATTGGTGATGGGATAGTCGGATTTGTCCATGTATTTGATACTTTCCCGGGTTGATTGCCATGGATTTGCGGGATATGGCATTA	7	31	Deletion	0.01	-3	PFSVLTAGGWGSGWGFATILCLMWRAVEIGTCW*	PFSVLTAGGWGSGWGFATILCLMWRRAVEIGTCW*	CCTTTCTCTGTGCTGACTGCGGGGGGATGGGGATCTGGGTGGGGGTTCGCTACGATTCTCTGCTTGATGTGG---CGGGCGGTTGAGATCGGAACTTGTTGGTGATAGGTCTGCCTGTATGCTTCGTGTTGCATTGAATGGTGCTTAGATCTGTGGGATTGGTGATGGGATAGTCGGATTTGTCCATGTATTTGATACTTTCCCGGGTTGATTGCCATGGATTTGCGGGATATGGCATTA	CCTTTCTCTGTGCTGACTGCGGGGGGATGGGGATCTGGGTGGGGGTTCGCTACGATTCTCTGCTTGATGTGGAGACGGGCGGTTGAGATCGGAACTTGTTGGTGATAGATCTGCCTGTATGCTTCGTGTTGCATTGAATGGTGCTTAGATCTGTGGGATTGGTGATGGGATAGTCGGATTTGTCCATGTATTTGATACTTTCCCGGGTTGATTGCCATGGATTTGCGGGATATGGCATTA
CCTTTCTCTGTGCTGACTGCGGGGGGATGGGGATCTGGGTGGGGGTTCGCTACGATTCTCTGCTTGATGTGG---CGGGGGGTTGAGATCGGAACTTGTTGGTGATAGATCTGCCTGTATGCTTCGTGTTGCATTGAATGGTGCTTAGATCTGTGGGATTGGTGATGGGATAGTCGGATTTGTCCATGTATTTGATACTTTCCCGGGTTGATTGCCATGGATTTGCGGGATATGGCATTA	7	29	Deletion	0.01	-3	PFSVLTAGGWGSGWGFATILCLMWRGVEIGTCW*	PFSVLTAGGWGSGWGFATILCLMWRRAVEIGTCW*	CCTTTCTCTGTGCTGACTGCGGGGGGATGGGGATCTGGGTGGGGGTTCGCTACGATTCTCTGCTTGATGTGG---CGGGGGGTTGAGATCGGAACTTGTTGGTGATAGATCTGCCTGTATGCTTCGTGTTGCATTGAATGGTGCTTAGATCTGTGGGATTGGTGATGGGATAGTCGGATTTGTCCATGTATTTGATACTTTCCCGGGTTGATTGCCATGGATTTGCGGGATATGGCATTA	CCTTTCTCTGTGCTGACTGCGGGGGGATGGGGATCTGGGTGGGGGTTCGCTACGATTCTCTGCTTGATGTGGAGACGGGCGGTTGAGATCGGAACTTGTTGGTGATAGATCTGCCTGTATGCTTCGTGTTGCATTGAATGGTGCTTAGATCTGTGGGATTGGTGATGGGATAGTCGGATTTGTCCATGTATTTGATACTTTCCCGGGTTGATTGCCATGGATTTGCGGGATATGGCATTA
CCTTTCTCTGTGCTGACTGCGGGGGGATGGGGATCTGGGTGGGGGTTCGCTACGATTCTCTGCTTGATGTGGA---GGGCGGTTGAGATCGGAACTTGTTGGCGATAGATCTGCCTGTATGCTTCGTGTTGCATTGAATGGTGCTTAGATCTGTGGGATTGGTGATGGGATAGTCGGATTTGTCCATGTATTTGATACTTTCCCGGGTTGATTGCCATGGATTTGCGGGATATGGCATTA	7	32	Deletion	0.01	-3	PFSVLTAGGWGSGWGFATILCLMWRAVEIGTCWR*	PFSVLTAGGWGSGWGFATILCLMWRRAVEIGTCW*	CCTTTCTCTGTGCTGACTGCGGGGGGATGGGGATCTGGGTGGGGGTTCGCTACGATTCTCTGCTTGATGTGGA---GGGCGGTTGAGATCGGAACTTGTTGGCGATAGATCTGCCTGTATGCTTCGTGTTGCATTGAATGGTGCTTAGATCTGTGGGATTGGTGATGGGATAGTCGGATTTGTCCATGTATTTGATACTTTCCCGGGTTGATTGCCATGGATTTGCGGGATATGGCATTA	CCTTTCTCTGTGCTGACTGCGGGGGGATGGGGATCTGGGTGGGGGTTCGCTACGATTCTCTGCTTGATGTGGAGACGGGCGGTTGAGATCGGAACTTGTTGGTGATAGATCTGCCTGTATGCTTCGTGTTGCATTGAATGGTGCTTAGATCTGTGGGATTGGTGATGGGATAGTCGGATTTGTCCATGTATTTGATACTTTCCCGGGTTGATTGCCATGGATTTGCGGGATATGGCATTA
CCTTTCTCTGTGCTGACTGCGGGGGGATGGGGATCTGGGTGGGGGTTCGCTACGATTCTCTGCTTGATGTGGA---GGGCGGTTGAGATCGGAACTTGTTGGTGATAGATCTGCCTGTATGCTTCGTGTTGCATTGAATGGTGCTTAGATCTGTGGGATTGGTGATGGGATAGTCGGACTTGTCCATGTATTTGATACTTTCCCGGGTTGATTGCCATGGATTTGCGGGATATGGCATTA	7	34	Deletion	0.01	-3	PFSVLTAGGWGSGWGFATILCLMWRAVEIGTCW*	PFSVLTAGGWGSGWGFATILCLMWRRAVEIGTCW*	CCTTTCTCTGTGCTGACTGCGGGGGGATGGGGATCTGGGTGGGGGTTCGCTACGATTCTCTGCTTGATGTGGA---GGGCGGTTGAGATCGGAACTTGTTGGTGATAGATCTGCCTGTATGCTTCGTGTTGCATTGAATGGTGCTTAGATCTGTGGGATTGGTGATGGGATAGTCGGACTTGTCCATGTATTTGATACTTTCCCGGGTTGATTGCCATGGATTTGCGGGATATGGCATTA	CCTTTCTCTGTGCTGACTGCGGGGGGATGGGGATCTGGGTGGGGGTTCGCTACGATTCTCTGCTTGATGTGGAGACGGGCGGTTGAGATCGGAACTTGTTGGTGATAGATCTGCCTGTATGCTTCGTGTTGCATTGAATGGTGCTTAGATCTGTGGGATTGGTGATGGGATAGTCGGATTTGTCCATGTATTTGATACTTTCCCGGGTTGATTGCCATGGATTTGCGGGATATGGCATTA
CCTTTCTCTGTGCTGACTGCGGGGGGATGGGGATCTGGGTGGGGGTTCGCTACGATTCTCTGCTTGATGTGGA---GGGCGGTTGAGATCGGAACTTGTTGGTGATAGATCTGCCTGTATGCTTCGTGTTGCATTGAATGGTGCTTAGATCTGTGGGATTGGTGATGGGATAGTCGGATTCGTCCATGTATTTGATACTTTCCCGGGTTGATTGCCATGGATTTGCGGGATATGGCATTA	7	32	Deletion	0.01	-3	PFSVLTAGGWGSGWGFATILCLMWRAVEIGTCW*	PFSVLTAGGWGSGWGFATILCLMWRRAVEIGTCW*	CCTTTCTCTGTGCTGACTGCGGGGGGATGGGGATCTGGGTGGGGGTTCGCTACGATTCTCTGCTTGATGTGGA---GGGCGGTTGAGATCGGAACTTGTTGGTGATAGATCTGCCTGTATGCTTCGTGTTGCATTGAATGGTGCTTAGATCTGTGGGATTGGTGATGGGATAGTCGGATTCGTCCATGTATTTGATACTTTCCCGGGTTGATTGCCATGGATTTGCGGGATATGGCATTA	CCTTTCTCTGTGCTGACTGCGGGGGGATGGGGATCTGGGTGGGGGTTCGCTACGATTCTCTGCTTGATGTGGAGACGGGCGGTTGAGATCGGAACTTGTTGGTGATAGATCTGCCTGTATGCTTCGTGTTGCATTGAATGGTGCTTAGATCTGTGGGATTGGTGATGGGATAGTCGGATTTGTCCATGTATTTGATACTTTCCCGGGTTGATTGCCATGGATTTGCGGGATATGGCATTA
CCTTTCTCTGTGCTGACTGCGGGGGGATGGGGATCTGGGTGGGGGTTCGCTACGATTCTCTGCTTGATGTGGA---GGGCGGTTGAGATCGGAACTTGTTGGTGATAGATCTGCCTGTATGCTTCGTGTTGCATTGAATGGTGCTTAGATCTGTGGGATTGGTGATGGGATAGTCGGATTTGTCCATGTATTTGATACTTCCCCGGGTTGATTGCCATGGATTTGCGGGATATGGCATTA	7	33	Deletion	0.01	-3	PFSVLTAGGWGSGWGFATILCLMWRAVEIGTCW*	PFSVLTAGGWGSGWGFATILCLMWRRAVEIGTCW*	CCTTTCTCTGTGCTGACTGCGGGGGGATGGGGATCTGGGTGGGGGTTCGCTACGATTCTCTGCTTGATGTGGA---GGGCGGTTGAGATCGGAACTTGTTGGTGATAGATCTGCCTGTATGCTTCGTGTTGCATTGAATGGTGCTTAGATCTGTGGGATTGGTGATGGGATAGTCGGATTTGTCCATGTATTTGATACTTCCCCGGGTTGATTGCCATGGATTTGCGGGATATGGCATTA	CCTTTCTCTGTGCTGACTGCGGGGGGATGGGGATCTGGGTGGGGGTTCGCTACGATTCTCTGCTTGATGTGGAGACGGGCGGTTGAGATCGGAACTTGTTGGTGATAGATCTGCCTGTATGCTTCGTGTTGCATTGAATGGTGCTTAGATCTGTGGGATTGGTGATGGGATAGTCGGATTTGTCCATGTATTTGATACTTTCCCGGGTTGATTGCCATGGATTTGCGGGATATGGCATTA
CCTTTCTCTGTGCTGACTGCGGGGGGATGGGGATCTGGGTGGGGGTTCGCTACGATTCTCTGCTTGATGTGGA---GGGCGGTTGAGATCGGAACTTGTTGGTGATAGATCTGCCTGTATGCTTCGTGTTGCATTGAATGGTGCTTAGATCTGTGGGATTGGTGATGGGATAGTCGGATTTGTCCATGTATTTGATACTTTCCCGGGTTGATTGCCATGGATTTGCGGGAT-TGGCATTA	7	33	Deletion	0.01	-4	PFSVLTAGGWGSGWGFATILCLMWRAVEIGTCW*	PFSVLTAGGWGSGWGFATILCLMWRRAVEIGTCW*	CCTTTCTCTGTGCTGACTGCGGGGGGATGGGGATCTGGGTGGGGGTTCGCTACGATTCTCTGCTTGATGTGGA---GGGCGGTTGAGATCGGAACTTGTTGGTGATAGATCTGCCTGTATGCTTCGTGTTGCATTGAATGGTGCTTAGATCTGTGGGATTGGTGATGGGATAGTCGGATTTGTCCATGTATTTGATACTTTCCCGGGTTGATTGCCATGGATTTGCGGGAT-TGGCATTA	CCTTTCTCTGTGCTGACTGCGGGGGGATGGGGATCTGGGTGGGGGTTCGCTACGATTCTCTGCTTGATGTGGAGACGGGCGGTTGAGATCGGAACTTGTTGGTGATAGATCTGCCTGTATGCTTCGTGTTGCATTGAATGGTGCTTAGATCTGTGGGATTGGTGATGGGATAGTCGGATTTGTCCATGTATTTGATACTTTCCCGGGTTGATTGCCATGGATTTGCGGGATATGGCATTA
CCTTTCTCTGTGCTGACTGCGGGGGGATGGGGATCTGGGTGGGGGTTCGCTACGATTCTCTGCTTGATGTGGA---GGGCGGTTGAGATCGGAACTTGTTGGTGATAGATCTGCCTGTATGCTTCGTGTTGCATTGAATGGTGCTTAGATCTGTGGGATTGGTGATGGGATAGTCGGATTTGTCCATGTATTTGATACTTTCCCGGGTTGATTGCCATGGATTTGCGGGATA-GGCATTA	7	33	Deletion	0.01	-4	PFSVLTAGGWGSGWGFATILCLMWRAVEIGTCW*	PFSVLTAGGWGSGWGFATILCLMWRRAVEIGTCW*	CCTTTCTCTGTGCTGACTGCGGGGGGATGGGGATCTGGGTGGGGGTTCGCTACGATTCTCTGCTTGATGTGGA---GGGCGGTTGAGATCGGAACTTGTTGGTGATAGATCTGCCTGTATGCTTCGTGTTGCATTGAATGGTGCTTAGATCTGTGGGATTGGTGATGGGATAGTCGGATTTGTCCATGTATTTGATACTTTCCCGGGTTGATTGCCATGGATTTGCGGGATA-GGCATTA	CCTTTCTCTGTGCTGACTGCGGGGGGATGGGGATCTGGGTGGGGGTTCGCTACGATTCTCTGCTTGATGTGGAGACGGGCGGTTGAGATCGGAACTTGTTGGTGATAGATCTGCCTGTATGCTTCGTGTTGCATTGAATGGTGCTTAGATCTGTGGGATTGGTGATGGGATAGTCGGATTTGTCCATGTATTTGATACTTTCCCGGGTTGATTGCCATGGATTTGCGGGATATGGCATTA
CCTTTCTCTGTGCTGACTGCGGGGGGATGGGGATCTGGGTGGGGGTTCGCTACGATTCTCTGCTTGATGTGGA---GGGCGGTTGAGATCGGAACTTGTTGGTGATAGATCTGCCTGTATGCTTCGTGTTGCATTGAGTGGTGCTTAGATCTGTGGGATTGGTGATGGGATAGTCGGATTTGTCCATGTATTTGATACTTTCCCGGGTTGATTGCCATGGATTTGCGGGATATGGCATTA	7	32	Deletion	0.01	-3	PFSVLTAGGWGSGWGFATILCLMWRAVEIGTCW*	PFSVLTAGGWGSGWGFATILCLMWRRAVEIGTCW*	CCTTTCTCTGTGCTGACTGCGGGGGGATGGGGATCTGGGTGGGGGTTCGCTACGATTCTCTGCTTGATGTGGA---GGGCGGTTGAGATCGGAACTTGTTGGTGATAGATCTGCCTGTATGCTTCGTGTTGCATTGAGTGGTGCTTAGATCTGTGGGATTGGTGATGGGATAGTCGGATTTGTCCATGTATTTGATACTTTCCCGGGTTGATTGCCATGGATTTGCGGGATATGGCATTA	CCTTTCTCTGTGCTGACTGCGGGGGGATGGGGATCTGGGTGGGGGTTCGCTACGATTCTCTGCTTGATGTGGAGACGGGCGGTTGAGATCGGAACTTGTTGGTGATAGATCTGCCTGTATGCTTCGTGTTGCATTGAATGGTGCTTAGATCTGTGGGATTGGTGATGGGATAGTCGGATTTGTCCATGTATTTGATACTTTCCCGGGTTGATTGCCATGGATTTGCGGGATATGGCATTA
CCTTTCTCTGTGCTGACTGCGGGGGGATGGGGATCTGGGTGGGGGTTCGCTACGATTCTCTGCTTGATGTGGAGACAGGCGGTTGAGATCGGAACTTGTTGGTGATAGATCTGCCTGTATGCTTCGTGTTGCATTGAATGGTGCTTAGATCTGTGGGATTGGTGATGGGATAGTCGGATTTGTCCATGTATTTGATACTTTCCCGGGTTGATTGCCATGGATTTGCGGGATATGGCATTA	7	28	1 Base Change	0.01	0	PFSVLTAGGWGSGWGFATILCLMWRQAVEIGTCW*	PFSVLTAGGWGSGWGFATILCLMWRRAVEIGTCW*	CCTTTCTCTGTGCTGACTGCGGGGGGATGGGGATCTGGGTGGGGGTTCGCTACGATTCTCTGCTTGATGTGGAGACAGGCGGTTGAGATCGGAACTTGTTGGTGATAGATCTGCCTGTATGCTTCGTGTTGCATTGAATGGTGCTTAGATCTGTGGGATTGGTGATGGGATAGTCGGATTTGTCCATGTATTTGATACTTTCCCGGGTTGATTGCCATGGATTTGCGGGATATGGCATTA	CCTTTCTCTGTGCTGACTGCGGGGGGATGGGGATCTGGGTGGGGGTTCGCTACGATTCTCTGCTTGATGTGGAGACGGGCGGTTGAGATCGGAACTTGTTGGTGATAGATCTGCCTGTATGCTTCGTGTTGCATTGAATGGTGCTTAGATCTGTGGGATTGGTGATGGGATAGTCGGATTTGTCCATGTATTTGATACTTTCCCGGGTTGATTGCCATGGATTTGCGGGATATGGCATTA
[truncated: 5,477 more rows]

## Sheet: Plate1-A2
TargetSequence	Reads	AvgQScore	Type	Pct	IndelLength	TargetAA	ReferenceAA	WideTargetSeq	WideReference	TargetLeftFlank	TargetRightFlank
[truncated: 4,102 more rows]
